# Supplementary material for: Analysis of the Relationship between Genomic GC Content and Patterns of Base Usage, Codon Usage and Amino Acid Usage in Prokaryotes: Similar GC Content Adopts Similar Compositional Frequencies Regardless of the Phylogenetic Lineages
Source: PLoS One. 2014 Sep 25;9(9):e107319. doi: 10.1371/journal.pone.0107319 (PMC4177787; doi:10.1371/journal.pone.0107319)
Supplement: Table S3 — Mean usage frequencies of 64 codons of all samples included in the analyses. (XLS) [file pone.0107319.s003.xls]

## Sheet: code_new
Table S3. The 64 kinds of codon usage frequencies of all samples included in the analyses.
	AAA	AAT	AAC	AAG	ATA	ATT	ATC	ATG	ACA	ACT	ACC	ACG	AGA	AGT	AGC	AGG	TAA	TAT	TAC	TAG	TTA	TTT	TTC	TTG	TCA	TCT	TCC	TCG	TGA	TGT	TGC	TGG	CAA	CAT	CAC	CAG	CTA	CTT	CTC	CTG	CCA	CCT	CCC	CCG	CGA	CGT	CGC	CGG	GAA
Acaryochloris marina MBIC11017 uid58167	0.024861	0.023367	0.01316	0.016219	0.004686	0.035574	0.019509	0.01926	0.009685	0.012725	0.02349	0.012138	0.004829	0.012715	0.011139	0.002476	0.001606	0.019527	0.008779	0.001054	0.022698	0.027691	0.011282	0.022796	0.008862	0.014537	0.011885	0.006037	0.000772	0.006249	0.004632	0.01535	0.034641	0.015246	0.006927	0.026521	0.014502	0.011138	0.01737	0.022561	0.010465	0.015304	0.017597	0.007734	0.011491	0.008969	0.012933	0.01058	0.034864
Acetobacter pasteurianus 386B uid214433	0.02027	0.014181	0.016456	0.01555	0.005992	0.030089	0.0141	0.025812	0.019018	0.005992	0.018138	0.014665	0.002494	0.005834	0.013497	0.002457	0.001553	0.014277	0.009147	0.000241	0.006375	0.024947	0.011126	0.017682	0.006135	0.014597	0.013573	0.004064	0.001284	0.004261	0.006932	0.014207	0.011175	0.015346	0.008927	0.028438	0.004889	0.020137	0.00705	0.045584	0.012292	0.012166	0.014148	0.016253	0.002522	0.017943	0.025149	0.011495	0.04008
Acetobacter pasteurianus IFO 3283 01 42C uid158377	0.020311	0.013667	0.016482	0.01573	0.005881	0.029622	0.014413	0.025813	0.018613	0.005604	0.018308	0.014623	0.002631	0.005795	0.013479	0.002733	0.001525	0.014392	0.009067	0.000257	0.006219	0.024731	0.011284	0.017387	0.006074	0.01437	0.013671	0.004121	0.001261	0.004442	0.007039	0.014309	0.010928	0.015566	0.008991	0.028532	0.004792	0.019689	0.007181	0.046326	0.012053	0.011833	0.014067	0.016151	0.002625	0.018077	0.025684	0.012161	0.040127
Acetobacter pasteurianus IFO 3283 01 uid59279	0.020272	0.013742	0.016445	0.015659	0.005921	0.02964	0.014531	0.025733	0.018636	0.005627	0.018297	0.014634	0.00265	0.005858	0.013477	0.002776	0.001502	0.014523	0.009084	0.000258	0.006251	0.024796	0.0114	0.017298	0.006141	0.014315	0.013604	0.004172	0.001267	0.00447	0.007033	0.014361	0.010918	0.015679	0.008982	0.028451	0.004836	0.019695	0.007336	0.046155	0.012047	0.011857	0.014021	0.016004	0.002687	0.018121	0.025703	0.01225	0.040018
Acetobacter pasteurianus IFO 3283 03 uid158373	0.020244	0.013718	0.016444	0.015653	0.005908	0.029623	0.014553	0.025739	0.018635	0.005618	0.018319	0.014635	0.002642	0.005855	0.013496	0.002775	0.001502	0.014502	0.009099	0.000257	0.006214	0.024771	0.011412	0.0173	0.006127	0.014306	0.013604	0.004166	0.001269	0.004471	0.007035	0.014339	0.010921	0.015688	0.008986	0.028475	0.004836	0.01968	0.007352	0.04619	0.012043	0.01185	0.014039	0.016008	0.002686	0.018131	0.025734	0.012271	0.040008
Acetobacter pasteurianus IFO 3283 07 uid158381	0.020271	0.013746	0.016446	0.015655	0.005923	0.029642	0.014535	0.025735	0.018637	0.005628	0.0183	0.014627	0.002649	0.005856	0.013481	0.002773	0.001502	0.014519	0.009087	0.000257	0.006251	0.0248	0.011399	0.017304	0.006138	0.014318	0.013604	0.004167	0.001268	0.004471	0.007033	0.01435	0.010922	0.015681	0.008982	0.028453	0.004839	0.019694	0.007337	0.046157	0.012045	0.01186	0.014028	0.016002	0.002682	0.018122	0.025702	0.012249	0.040025
Acetobacter pasteurianus IFO 3283 12 uid158379	0.020269	0.013749	0.016447	0.015654	0.005925	0.029646	0.014537	0.025738	0.018639	0.005628	0.018302	0.014621	0.002645	0.005854	0.013486	0.002771	0.001503	0.014515	0.009091	0.000257	0.006251	0.024802	0.0114	0.017306	0.006133	0.01432	0.013604	0.00416	0.001268	0.004472	0.007033	0.014341	0.010924	0.01568	0.008981	0.028455	0.004841	0.019691	0.007338	0.046163	0.012046	0.011862	0.014034	0.016	0.002678	0.018124	0.025705	0.012242	0.040027
Acetobacter pasteurianus IFO 3283 22 uid158383	0.020268	0.013748	0.016447	0.015652	0.005927	0.029628	0.014556	0.02573	0.018635	0.005625	0.018308	0.014628	0.00265	0.005858	0.013491	0.002776	0.0015	0.014513	0.009098	0.000258	0.006247	0.024793	0.011413	0.017297	0.006141	0.014311	0.0136	0.004167	0.001269	0.004475	0.00704	0.014341	0.010921	0.015691	0.008985	0.028459	0.004838	0.019681	0.007353	0.046166	0.012037	0.011855	0.014033	0.015999	0.002687	0.018125	0.02572	0.012264	0.040016
Acetobacter pasteurianus IFO 3283 26 uid158531	0.020267	0.013747	0.016447	0.015652	0.005927	0.029627	0.014556	0.02573	0.018637	0.005625	0.018308	0.014628	0.00265	0.005858	0.013491	0.002778	0.0015	0.014512	0.009097	0.000258	0.006247	0.024793	0.011413	0.017297	0.006141	0.014311	0.0136	0.004167	0.001269	0.004475	0.00704	0.014341	0.010921	0.015691	0.008984	0.028462	0.004838	0.019681	0.007353	0.046164	0.012039	0.011854	0.014033	0.015999	0.002687	0.018124	0.025719	0.012263	0.040015
Acetobacter pasteurianus IFO 3283 32 uid158375	0.020268	0.013749	0.016446	0.015655	0.005924	0.029646	0.014537	0.025737	0.018642	0.005628	0.018303	0.014621	0.002645	0.005854	0.013486	0.002774	0.001503	0.014515	0.009091	0.000257	0.006251	0.024801	0.0114	0.017306	0.006134	0.014319	0.013603	0.00416	0.001268	0.004472	0.007033	0.014341	0.010923	0.01568	0.008982	0.028458	0.004839	0.019691	0.007338	0.046163	0.012043	0.011862	0.014034	0.016001	0.002677	0.018124	0.025705	0.012242	0.040027
Acetobacterium woodii DSM 1030 uid88073	0.057024	0.037612	0.013917	0.014005	0.010701	0.052229	0.023976	0.028673	0.012579	0.010115	0.020648	0.011937	0.006638	0.013847	0.008299	0.001652	0.001861	0.029338	0.007289	0.00058	0.028166	0.036427	0.006933	0.019692	0.012357	0.006833	0.006966	0.009055	0.000583	0.008715	0.003772	0.008005	0.019615	0.01312	0.003703	0.014902	0.005756	0.015501	0.006216	0.018461	0.008666	0.006052	0.006848	0.011549	0.007866	0.007093	0.005571	0.007949	0.055879
Acetohalobium arabaticum DSM 5501 uid51423	0.039511	0.040128	0.006626	0.031373	0.020813	0.04879	0.013253	0.021788	0.014255	0.026092	0.006145	0.003424	0.016373	0.015374	0.006832	0.004764	0.002246	0.02839	0.004716	0.00064	0.048567	0.029754	0.006823	0.015191	0.01027	0.014313	0.004497	0.003542	0.000359	0.007117	0.001382	0.007156	0.011536	0.012254	0.00228	0.024635	0.010687	0.010546	0.003574	0.012404	0.008005	0.013009	0.003031	0.008822	0.004403	0.004519	0.003513	0.006363	0.059098
Acholeplasma laidlawii PG 8A uid58901	0.061038	0.037689	0.017486	0.016923	0.020572	0.049944	0.018851	0.02528	0.029787	0.017278	0.007441	0.004533	0.019077	0.017696	0.003296	0.001474	0.002044	0.035288	0.010478	0.000446	0.05516	0.038122	0.010162	0.00553	0.01835	0.015822	0.004005	0.002032	0.000559	0.002967	0.000535	0.007348	0.028064	0.01493	0.005901	0.002901	0.016096	0.016604	0.003809	0.002609	0.016154	0.010377	0.001129	0.0027	0.001648	0.009	0.001926	0.000133	0.053514
Achromobacter xylosoxidans A8 uid59899	0.00436	0.006309	0.01977	0.024741	0.002192	0.004791	0.037279	0.024895	0.001485	0.002187	0.027615	0.01871	0.00064	0.001622	0.018642	0.001952	0.000541	0.007763	0.01721	0.000612	0.000344	0.004587	0.028564	0.011938	0.001241	0.001377	0.013847	0.017545	0.001868	0.000877	0.007988	0.014181	0.00785	0.007848	0.012848	0.031751	0.001596	0.003111	0.010684	0.080147	0.00213	0.003775	0.021099	0.026055	0.001539	0.00535	0.049112	0.011456	0.026832
Achromobacter xylosoxidans uid205255	0.003639	0.00515	0.020318	0.023864	0.000819	0.003615	0.038307	0.023462	0.00124	0.001387	0.029636	0.017571	0.000409	0.001411	0.017786	0.001556	0.00045	0.006506	0.017797	0.000542	0.000258	0.003467	0.029543	0.009481	0.00104	0.000885	0.010457	0.019901	0.002146	0.00094	0.007723	0.014882	0.006586	0.006496	0.014397	0.032478	0.000909	0.002471	0.011558	0.084012	0.001936	0.00214	0.019257	0.031034	0.001686	0.00516	0.052462	0.012555	0.023518
Acidaminococcus fermentans DSM 20731 uid43471	0.030583	0.012882	0.022319	0.028832	0.001822	0.013323	0.042853	0.028269	0.003425	0.004425	0.035292	0.011134	0.00313	0.00487	0.017099	0.002387	0.001527	0.015911	0.016668	0.000304	0.001824	0.011974	0.026576	0.00525	0.001189	0.004582	0.020395	0.002148	0.001173	0.003597	0.009516	0.010312	0.003017	0.011319	0.008901	0.033822	0.000642	0.005365	0.013362	0.074805	0.001377	0.005803	0.019925	0.015295	0.001045	0.00455	0.005588	0.036392	0.052483
Acidaminococcus intestini RyC MR95 uid74445	0.030457	0.017909	0.016136	0.033309	0.002932	0.02632	0.033774	0.030485	0.00975	0.00534	0.020018	0.021079	0.003595	0.007815	0.014205	0.00414	0.001758	0.0219	0.01222	0.000381	0.004201	0.024322	0.01669	0.011116	0.004346	0.00663	0.017443	0.005217	0.001213	0.004279	0.008259	0.009504	0.009065	0.014964	0.007076	0.021325	0.003737	0.03257	0.020117	0.025435	0.004513	0.011014	0.012586	0.012421	0.003082	0.010865	0.016408	0.012444	0.049323
Acidianus hospitalis W1 uid66875	0.050674	0.032114	0.014788	0.031907	0.053663	0.035858	0.007895	0.021597	0.013543	0.022946	0.004245	0.00446	0.024391	0.012499	0.008219	0.013684	0.001983	0.031239	0.015653	0.000604	0.045317	0.029126	0.015713	0.011489	0.016334	0.019935	0.006278	0.004253	0.001153	0.004453	0.003424	0.009597	0.015085	0.008134	0.004587	0.005152	0.016455	0.018057	0.004942	0.003671	0.01445	0.017296	0.003214	0.003708	0.000528	0.000989	0.000414	0.000161	0.049977
Acidilobus saccharovorans 345 15 uid51395	0.005075	0.004205	0.024084	0.037804	0.04205	0.006508	0.007488	0.023094	0.006184	0.007599	0.016908	0.013861	0.005782	0.002739	0.025729	0.053366	0.000894	0.00838	0.031414	0.000745	0.004591	0.008045	0.024884	0.005024	0.011536	0.005117	0.015096	0.01241	0.001686	0.000963	0.005412	0.01223	0.001748	0.002506	0.010797	0.020386	0.008098	0.019825	0.033834	0.037004	0.008713	0.009926	0.018374	0.012472	0.000408	0.000943	0.0033	0.001153	0.007657
Acidimicrobidae bacterium YM16 304 uid193703	0.001946	0.001445	0.021713	0.016312	0.000165	0.001721	0.044674	0.01939	0.002546	0.001647	0.035531	0.025685	0.000744	0.002428	0.014729	0.001018	5.6e-05	0.001802	0.016416	0.000243	4.1e-05	0.000992	0.03095	0.007129	0.002345	0.000999	0.008395	0.030748	0.002569	0.001726	0.006535	0.014152	0.004664	0.003095	0.018211	0.020919	0.000332	0.001965	0.052142	0.028494	0.003079	0.00223	0.017849	0.031332	0.010528	0.009634	0.031387	0.01349	0.019717
Acidimicrobium ferrooxidans DSM 10331 uid59215	0.000502	0.002109	0.013644	0.012337	0.000326	0.002365	0.038199	0.014278	0.002451	0.001978	0.02556	0.023814	0.001067	0.003406	0.013533	0.003462	0.000222	0.003567	0.014507	0.001003	0.000154	0.003008	0.024104	0.007857	0.002381	0.00203	0.009817	0.02375	0.00184	0.001683	0.00445	0.014268	0.004406	0.00488	0.017133	0.021071	0.000966	0.00618	0.066291	0.026855	0.006472	0.005163	0.016559	0.02639	0.012594	0.014573	0.037059	0.018194	0.009386
Acidiphilium cryptum JF 5 uid58447	0.004178	0.00656	0.01604	0.018353	0.001033	0.005291	0.044661	0.022854	0.002425	0.001233	0.028759	0.018761	0.000813	0.001684	0.013487	0.002757	0.000261	0.009517	0.010075	0.000316	0.000423	0.004118	0.030925	0.004276	0.001604	0.001113	0.010967	0.017601	0.002377	0.00087	0.007675	0.012595	0.00297	0.010562	0.011773	0.023505	0.000858	0.006636	0.039531	0.052539	0.002288	0.002175	0.016637	0.036407	0.002357	0.004425	0.045226	0.024856	0.016365
Acidiphilium multivorum AIU301 uid63345	0.004421	0.006668	0.015957	0.018365	0.001057	0.005546	0.044552	0.022966	0.002604	0.001352	0.028423	0.01874	0.000829	0.001861	0.013686	0.002868	0.000291	0.009695	0.010099	0.000329	0.000432	0.00436	0.030941	0.004826	0.001754	0.001201	0.010768	0.017462	0.002396	0.000924	0.007638	0.01297	0.003206	0.010606	0.011832	0.023379	0.001003	0.006874	0.039085	0.052492	0.002592	0.002296	0.016386	0.036162	0.002539	0.004661	0.044648	0.025039	0.016439
Acidithiobacillus caldus SM 1 uid70791	0.009178	0.010402	0.014024	0.01974	0.003438	0.010844	0.032149	0.020826	0.002605	0.003233	0.025388	0.014386	0.001557	0.007762	0.017483	0.002513	0.000507	0.010347	0.014965	0.000544	0.001921	0.015202	0.020588	0.016247	0.001555	0.003397	0.013905	0.009001	0.002279	0.003199	0.005909	0.017414	0.009746	0.00892	0.016655	0.033181	0.004117	0.009526	0.029938	0.055408	0.005944	0.005071	0.024297	0.018807	0.005655	0.013328	0.034785	0.019139	0.021209
Acidithiobacillus ferrivorans SS3 uid67387	0.015996	0.015038	0.014292	0.01718	0.006452	0.019695	0.027682	0.025023	0.006043	0.006223	0.024521	0.013703	0.002455	0.008935	0.015513	0.002781	0.000996	0.01526	0.01134	0.000508	0.005783	0.018207	0.017358	0.019385	0.004249	0.006066	0.012102	0.007625	0.001775	0.00378	0.005953	0.015796	0.013532	0.014987	0.01189	0.030417	0.004573	0.010075	0.022004	0.048226	0.007223	0.007601	0.017664	0.018543	0.004609	0.013809	0.027003	0.015908	0.028716
Acidithiobacillus ferrooxidans ATCC 23270 uid57649	0.013503	0.012878	0.015014	0.016898	0.005263	0.015524	0.031395	0.024691	0.0046	0.004738	0.026247	0.013847	0.002255	0.007438	0.015996	0.003545	0.000851	0.014405	0.011758	0.000563	0.003722	0.016473	0.018968	0.017782	0.003171	0.004662	0.014453	0.008031	0.002109	0.003538	0.006611	0.015976	0.011324	0.014734	0.012314	0.030661	0.003369	0.00899	0.022164	0.053417	0.006062	0.006932	0.019796	0.020542	0.004725	0.013496	0.027738	0.018476	0.027795
Acidithiobacillus ferrooxidans ATCC 53993 uid58613	0.013323	0.012754	0.014811	0.016897	0.005125	0.015299	0.031505	0.024635	0.004501	0.004696	0.026593	0.013734	0.002068	0.00739	0.015922	0.003344	0.000751	0.01446	0.011824	0.00052	0.003647	0.01616	0.01904	0.017105	0.003052	0.00443	0.014262	0.007772	0.002026	0.003304	0.006185	0.015932	0.011287	0.014642	0.012329	0.031235	0.003319	0.009163	0.023094	0.054524	0.005734	0.006835	0.020277	0.020172	0.004571	0.013654	0.028403	0.018365	0.028032
Acidobacterium capsulatum ATCC 51196 uid59127	0.008679	0.012785	0.019325	0.025166	0.001717	0.019634	0.027041	0.022919	0.005246	0.005113	0.023808	0.021853	0.001967	0.003618	0.019085	0.002463	0.000785	0.012466	0.015591	0.000855	0.001247	0.017987	0.019637	0.009715	0.004859	0.005238	0.012263	0.015723	0.001196	0.001334	0.007689	0.014037	0.007993	0.011399	0.014463	0.03435	0.00188	0.010224	0.028847	0.049854	0.004742	0.007227	0.017721	0.024514	0.003379	0.006911	0.037532	0.013057	0.021081
Acidobacterium MP5ACTX9 uid50551	0.007318	0.008643	0.024098	0.031272	0.001925	0.010414	0.037499	0.02226	0.005077	0.005241	0.032644	0.022689	0.00183	0.004017	0.016218	0.003636	0.000979	0.009148	0.017073	0.001078	0.001357	0.011356	0.027038	0.009555	0.004836	0.0048	0.018467	0.013046	0.000876	0.001783	0.00667	0.012356	0.006466	0.008619	0.014228	0.031101	0.002914	0.010949	0.037441	0.038444	0.005421	0.007199	0.020687	0.021024	0.003631	0.007716	0.026063	0.014643	0.017203
Acidothermus cellulolyticus 11B uid58501	0.004963	0.006142	0.012888	0.012095	0.001383	0.010922	0.029538	0.014864	0.004202	0.002887	0.029639	0.022237	0.00099	0.00391	0.013101	0.001802	0.000327	0.004936	0.016275	0.000613	0.00104	0.006043	0.023156	0.012451	0.003284	0.001913	0.013229	0.015245	0.002007	0.001878	0.006605	0.013838	0.006511	0.006014	0.015705	0.021046	0.001246	0.010638	0.039653	0.035235	0.004331	0.003775	0.014076	0.039412	0.007052	0.009405	0.028385	0.037105	0.018864
Acidovorax avenae ATCC 19860 uid42497	0.002703	0.003444	0.018657	0.022637	0.000731	0.002378	0.035777	0.023186	0.001449	0.001276	0.026071	0.020932	0.000476	0.001317	0.018062	0.002194	0.000217	0.004551	0.016369	0.000282	0.000185	0.002103	0.030832	0.004187	0.000828	0.001275	0.015243	0.014968	0.00237	0.000532	0.008763	0.015171	0.003486	0.006396	0.01718	0.03728	0.000476	0.0026	0.025488	0.07263	0.002116	0.003392	0.024758	0.027482	0.001382	0.004001	0.04965	0.017441	0.018062
Acidovorax citrulli AAC00 1 uid58429	0.003265	0.003665	0.01872	0.023403	0.000867	0.002618	0.035225	0.023176	0.001748	0.001393	0.025765	0.0211	0.000717	0.00152	0.018052	0.002518	0.000257	0.004461	0.016659	0.000305	0.000291	0.002444	0.029911	0.004848	0.001081	0.001565	0.015033	0.014629	0.002397	0.000598	0.008888	0.015277	0.004091	0.006358	0.017226	0.036758	0.000656	0.002844	0.025586	0.068778	0.002494	0.003666	0.024404	0.027231	0.002131	0.004373	0.049573	0.017819	0.01842
Acidovorax ebreus TPSY uid59233	0.003996	0.003695	0.020141	0.026339	0.000761	0.005228	0.034254	0.024457	0.002445	0.001839	0.026538	0.020329	0.000389	0.001973	0.019684	0.001018	0.000516	0.004601	0.016945	0.000334	0.000345	0.006591	0.026293	0.009158	0.001404	0.001643	0.011333	0.013162	0.002222	0.000858	0.008577	0.015075	0.007219	0.006396	0.017687	0.037997	0.001197	0.003063	0.015653	0.078533	0.003019	0.003959	0.025312	0.022111	0.001576	0.006238	0.051135	0.00977	0.016589
Acidovorax JS42 uid58427	0.004867	0.004105	0.019905	0.02665	0.000996	0.00557	0.033796	0.024229	0.002721	0.002079	0.026356	0.019786	0.000674	0.002286	0.019612	0.001512	0.000497	0.004813	0.016804	0.000336	0.000503	0.007025	0.025763	0.010023	0.001723	0.001974	0.011077	0.013098	0.002242	0.000972	0.008782	0.015359	0.007873	0.006852	0.017811	0.0374	0.001383	0.003695	0.016516	0.075837	0.003593	0.00427	0.02431	0.022034	0.002229	0.006604	0.049941	0.011009	0.01743
Acidovorax KKS102 uid176500	0.0059	0.004225	0.021508	0.026949	0.000859	0.008087	0.032248	0.024876	0.003636	0.002785	0.030431	0.017711	0.000527	0.002651	0.020625	0.001192	0.000502	0.004648	0.016755	0.000367	0.000457	0.012987	0.020426	0.01108	0.001945	0.002759	0.01011	0.014408	0.002203	0.001254	0.00768	0.014889	0.008719	0.005696	0.017915	0.035664	0.001379	0.003498	0.015671	0.074472	0.004227	0.005714	0.026063	0.017672	0.002066	0.006862	0.044489	0.010694	0.019727
Aciduliprofundum boonei T469 uid43333	0.046	0.033172	0.012523	0.036476	0.04978	0.031734	0.011379	0.028402	0.01604	0.012525	0.008519	0.005534	0.024372	0.009806	0.010462	0.0141	0.001487	0.027996	0.017951	0.000451	0.018542	0.02523	0.016979	0.020306	0.009602	0.013472	0.008057	0.002883	0.001347	0.002691	0.004194	0.011657	0.009187	0.012242	0.005238	0.009113	0.010332	0.020589	0.012298	0.008351	0.014045	0.01187	0.008234	0.0038	0.001583	0.003106	0.003779	0.00094	0.037157
Aciduliprofundum MAR08 339 uid184407	0.033479	0.023798	0.017943	0.037969	0.045734	0.027447	0.014186	0.029873	0.014524	0.00746	0.014106	0.008142	0.02047	0.008869	0.010818	0.021423	0.001172	0.01911	0.024909	0.000461	0.007076	0.022167	0.020313	0.013144	0.010114	0.00876	0.012263	0.003192	0.00173	0.002342	0.004708	0.011508	0.004938	0.010202	0.00846	0.013826	0.007708	0.024926	0.018274	0.019931	0.011934	0.008833	0.012782	0.005105	0.001841	0.004677	0.005673	0.002313	0.031424
Acinetobacter ADP1 uid61597	0.04071	0.032318	0.010966	0.012089	0.006189	0.047545	0.016446	0.024371	0.016672	0.01371	0.01478	0.008189	0.003845	0.015269	0.008547	0.000782	0.002303	0.025707	0.007008	0.000348	0.031262	0.034566	0.008311	0.022232	0.014368	0.013984	0.003465	0.006572	0.00049	0.006895	0.002614	0.012728	0.032649	0.020115	0.0054	0.023222	0.008709	0.017858	0.008623	0.016882	0.016714	0.013541	0.004015	0.005273	0.005509	0.023109	0.008176	0.002343	0.041165
Acinetobacter baumannii 1656 2 uid158677	0.044421	0.029768	0.014746	0.012356	0.006021	0.049366	0.012783	0.023457	0.016638	0.018809	0.011406	0.007216	0.004302	0.014217	0.008953	0.000846	0.002472	0.024471	0.007758	0.000364	0.042723	0.031348	0.011364	0.017046	0.014511	0.014827	0.002439	0.004999	0.000424	0.006572	0.002871	0.012831	0.036284	0.017193	0.006091	0.015908	0.009337	0.019672	0.007279	0.007446	0.016578	0.014319	0.002603	0.006924	0.004704	0.023215	0.00775	0.001895	0.044091
Acinetobacter baumannii AB0057 uid59083	0.044013	0.029847	0.014746	0.012681	0.006122	0.048897	0.012833	0.023721	0.016624	0.018857	0.011489	0.007191	0.004513	0.014294	0.009005	0.000824	0.002475	0.024666	0.007917	0.000378	0.042468	0.031361	0.011485	0.016848	0.014493	0.014977	0.002494	0.005156	0.000432	0.006707	0.002877	0.012876	0.035653	0.017105	0.006196	0.015775	0.009324	0.019695	0.007306	0.007547	0.016574	0.014306	0.002579	0.007057	0.004641	0.023017	0.007835	0.001964	0.044196
Acinetobacter baumannii AB307 0294 uid59271	0.044041	0.029637	0.014755	0.011848	0.005963	0.049795	0.012544	0.023495	0.016768	0.018868	0.011597	0.007143	0.004192	0.01437	0.009035	0.000676	0.00249	0.024809	0.007684	0.000341	0.04339	0.031648	0.011361	0.016911	0.014304	0.014944	0.002344	0.00512	0.000367	0.006634	0.002743	0.012634	0.036248	0.017242	0.006159	0.01575	0.009287	0.019818	0.007239	0.007214	0.016746	0.014462	0.002444	0.007036	0.004438	0.023396	0.007658	0.001663	0.044306
Acinetobacter baumannii ACICU uid58765	0.044457	0.030008	0.014776	0.012304	0.006113	0.049389	0.012625	0.023585	0.016595	0.01903	0.011352	0.007188	0.004468	0.014504	0.008964	0.000805	0.002478	0.024671	0.007823	0.00036	0.043172	0.031522	0.011365	0.016855	0.014574	0.01504	0.002456	0.005173	0.000445	0.006601	0.002819	0.012711	0.03611	0.017208	0.006081	0.015724	0.009416	0.019706	0.007247	0.00725	0.016512	0.014369	0.002559	0.006909	0.004565	0.023001	0.007647	0.001781	0.044183
Acinetobacter baumannii ATCC 17978 uid58731	0.043342	0.029375	0.014955	0.012068	0.005564	0.049623	0.012658	0.023475	0.016182	0.018547	0.011378	0.007187	0.004294	0.014146	0.008871	0.000779	0.002629	0.024665	0.007917	0.000404	0.042956	0.030762	0.011713	0.017364	0.01424	0.014606	0.00236	0.005239	0.000473	0.006564	0.002738	0.012938	0.035917	0.017416	0.006226	0.016062	0.009333	0.019587	0.007156	0.007311	0.016884	0.014416	0.0025	0.00715	0.004493	0.023854	0.007781	0.00181	0.04432
Acinetobacter baumannii AYE uid61637	0.04387	0.029463	0.014823	0.012388	0.006337	0.048851	0.013022	0.023879	0.016678	0.018641	0.0116	0.007265	0.004476	0.014112	0.009016	0.000936	0.002386	0.024441	0.007848	0.000362	0.042477	0.031378	0.011681	0.017334	0.014453	0.01488	0.002545	0.005161	0.000419	0.006783	0.002944	0.012861	0.035525	0.017094	0.006216	0.015876	0.009331	0.019769	0.007533	0.007867	0.016497	0.014311	0.002609	0.007077	0.004588	0.023142	0.007972	0.00194	0.043761
Acinetobacter baumannii BJAB07104 uid210971	0.044803	0.030245	0.014673	0.012534	0.006175	0.049517	0.012776	0.023536	0.016605	0.018979	0.011274	0.007123	0.0046	0.01445	0.00891	0.00079	0.002487	0.024625	0.007781	0.000373	0.043176	0.031683	0.011352	0.016922	0.0147	0.014999	0.002427	0.005054	0.000405	0.006667	0.002827	0.012801	0.036052	0.017124	0.006063	0.015679	0.009468	0.019722	0.007224	0.007165	0.016502	0.014315	0.002593	0.006822	0.004607	0.02296	0.007584	0.001787	0.044448
Acinetobacter baumannii BJAB0715 uid210972	0.045117	0.030435	0.014684	0.012687	0.006428	0.049398	0.012738	0.023634	0.016606	0.018786	0.011256	0.007072	0.004583	0.014463	0.008928	0.000849	0.002483	0.02486	0.007826	0.000387	0.043232	0.031773	0.011362	0.01697	0.014779	0.015074	0.002446	0.005052	0.000435	0.006686	0.002832	0.012688	0.036107	0.017206	0.006117	0.015744	0.009401	0.019798	0.007283	0.007223	0.016336	0.014345	0.002596	0.006836	0.004597	0.022908	0.007679	0.00184	0.044539
Acinetobacter baumannii BJAB0868 uid210973	0.0446	0.030108	0.014686	0.012376	0.006101	0.049529	0.012746	0.023536	0.016647	0.01888	0.011363	0.007156	0.004518	0.014437	0.008954	0.000783	0.002477	0.024674	0.007754	0.000366	0.043233	0.031595	0.011345	0.016976	0.014661	0.015035	0.002429	0.005109	0.000409	0.006617	0.002825	0.012811	0.036105	0.017208	0.006114	0.015711	0.009462	0.01975	0.00727	0.007266	0.016551	0.014263	0.002628	0.006815	0.004559	0.023017	0.007611	0.001794	0.044255
Acinetobacter baumannii D1279779 uid190222	0.044403	0.02953	0.01482	0.012061	0.005885	0.049849	0.012524	0.023832	0.016234	0.018742	0.011321	0.007157	0.004118	0.014298	0.008989	0.000714	0.002481	0.024542	0.007693	0.000334	0.043724	0.031499	0.011418	0.017147	0.014288	0.014935	0.002356	0.00512	0.000394	0.006709	0.002744	0.012711	0.03651	0.017463	0.006187	0.016037	0.009321	0.019707	0.007247	0.007217	0.016573	0.014387	0.002503	0.006973	0.004429	0.023641	0.007668	0.001676	0.044473
Acinetobacter baumannii MDR TJ uid162739	0.044378	0.029923	0.014667	0.012593	0.006295	0.049257	0.012856	0.02371	0.016589	0.018868	0.011349	0.007224	0.004538	0.014406	0.009011	0.000854	0.002447	0.024615	0.007886	0.000343	0.04289	0.031456	0.011407	0.016938	0.014619	0.015007	0.002513	0.005165	0.000422	0.006664	0.002889	0.012787	0.035843	0.017183	0.0061	0.015753	0.009452	0.019764	0.007344	0.007464	0.016455	0.014311	0.002628	0.006916	0.004629	0.022902	0.007791	0.001859	0.044044
Acinetobacter baumannii MDR ZJ06 uid158685	0.044797	0.030143	0.01475	0.012793	0.006468	0.048994	0.012975	0.024014	0.016549	0.018842	0.01125	0.007186	0.004657	0.014461	0.009019	0.000973	0.002476	0.024508	0.007825	0.000377	0.042736	0.031699	0.011439	0.016985	0.014767	0.014936	0.002503	0.005092	0.000441	0.006739	0.002958	0.012763	0.035749	0.017156	0.006141	0.015799	0.009494	0.019752	0.007258	0.007371	0.016415	0.014249	0.002658	0.00688	0.004702	0.0228	0.00764	0.001894	0.044212
Acinetobacter baumannii SDF uid61601	0.045622	0.028122	0.014686	0.014598	0.00572	0.048285	0.013252	0.023464	0.017768	0.01874	0.010893	0.006479	0.004511	0.014136	0.009188	0.001555	0.002416	0.024297	0.008093	0.000299	0.042087	0.029362	0.012012	0.01761	0.014876	0.015453	0.002832	0.004924	0.000524	0.00719	0.00333	0.013137	0.035879	0.018144	0.006286	0.01598	0.009581	0.020584	0.007191	0.006744	0.016065	0.014363	0.002558	0.006363	0.006081	0.024983	0.007475	0.001812	0.043012
Acinetobacter baumannii TCDC AB0715 uid158679	0.044728	0.030265	0.014769	0.012828	0.006246	0.048892	0.012799	0.023435	0.016742	0.019001	0.011186	0.007068	0.004638	0.014455	0.008974	0.000878	0.002439	0.024573	0.007894	0.000347	0.042654	0.031417	0.011337	0.016726	0.014787	0.014993	0.002479	0.005038	0.000437	0.006579	0.002876	0.012745	0.03597	0.017072	0.006091	0.015622	0.009474	0.019707	0.007214	0.007367	0.016463	0.014211	0.002638	0.006842	0.00467	0.022771	0.007746	0.001945	0.044662
Acinetobacter baumannii TYTH 1 uid176498	0.04464	0.030129	0.014719	0.012507	0.006266	0.049261	0.012877	0.023885	0.016548	0.018951	0.011309	0.007148	0.004507	0.014503	0.008971	0.000815	0.002452	0.024683	0.007834	0.000349	0.042877	0.031607	0.011389	0.017003	0.014648	0.015114	0.002478	0.00511	0.00041	0.006614	0.002861	0.012765	0.035868	0.017225	0.006116	0.015726	0.009428	0.01974	0.00727	0.007432	0.016559	0.014275	0.002601	0.006891	0.004599	0.022982	0.00765	0.001801	0.044197
Acinetobacter calcoaceticus PHEA 2 uid83123	0.044285	0.03007	0.014628	0.011626	0.005688	0.049936	0.012704	0.023431	0.016587	0.019016	0.011004	0.007327	0.004149	0.014611	0.009293	0.000676	0.002468	0.024813	0.007779	0.000356	0.043121	0.032034	0.011223	0.017299	0.014679	0.015427	0.002018	0.005177	0.000372	0.006575	0.00274	0.012746	0.036964	0.017373	0.006007	0.015534	0.009856	0.019404	0.007474	0.007375	0.017059	0.014271	0.0027	0.006057	0.004885	0.022738	0.00786	0.001471	0.044016
Acinetobacter oleivorans DR1 uid50119	0.044739	0.030478	0.014263	0.011966	0.006193	0.050099	0.012259	0.023556	0.016819	0.018833	0.010705	0.007408	0.004552	0.014831	0.009084	0.000695	0.002516	0.024832	0.00774	0.00031	0.043098	0.032662	0.011219	0.017218	0.014996	0.015608	0.002164	0.005182	0.000386	0.006545	0.002752	0.012857	0.036428	0.017278	0.006074	0.015423	0.009795	0.019682	0.007377	0.007251	0.017217	0.014257	0.002781	0.005829	0.005108	0.022032	0.0078	0.001572	0.044261
Actinobacillus pleuropneumoniae serovar 3 JL03 uid58891	0.054059	0.029859	0.016424	0.008139	0.004122	0.043095	0.020919	0.02381	0.008455	0.011452	0.018503	0.012845	0.004097	0.010667	0.0111	0.000526	0.002494	0.023045	0.00871	0.000479	0.052442	0.028477	0.016878	0.017087	0.009693	0.008814	0.006493	0.010713	0.000204	0.005945	0.00394	0.011563	0.038351	0.012848	0.00773	0.00979	0.006623	0.014612	0.006145	0.008374	0.004332	0.007538	0.001989	0.023448	0.00511	0.023949	0.009092	0.001478	0.051672
Actinobacillus pleuropneumoniae serovar 5b L20 uid58789	0.054217	0.029907	0.016809	0.007999	0.003886	0.042651	0.020892	0.02367	0.008624	0.01162	0.01869	0.013312	0.004118	0.010531	0.011224	0.000498	0.002417	0.022667	0.008686	0.000466	0.051919	0.027822	0.016696	0.01695	0.009736	0.008719	0.00645	0.010771	0.000191	0.005849	0.003889	0.011408	0.038106	0.012647	0.007624	0.009789	0.006533	0.014373	0.006156	0.008428	0.004258	0.007434	0.001969	0.023432	0.005189	0.02391	0.009144	0.001496	0.051687
Actinobacillus pleuropneumoniae serovar 7 AP76 uid59231	0.054264	0.030449	0.016786	0.008459	0.004383	0.042636	0.020588	0.023652	0.009146	0.011679	0.018458	0.013055	0.004191	0.010812	0.011249	0.000582	0.002427	0.022911	0.008834	0.000466	0.051349	0.028095	0.016525	0.016866	0.009919	0.008923	0.006497	0.010543	0.000222	0.005965	0.003975	0.011685	0.037897	0.012705	0.007625	0.009801	0.006712	0.014505	0.006128	0.008422	0.0045	0.007554	0.002012	0.02275	0.005332	0.023537	0.009097	0.001585	0.051152
Actinobacillus succinogenes 130Z uid58247	0.05063	0.027201	0.018695	0.006929	0.004737	0.039323	0.022748	0.024772	0.007436	0.009673	0.021174	0.015041	0.002563	0.009546	0.010723	0.000483	0.002239	0.020988	0.009993	0.00041	0.035783	0.02538	0.018562	0.02628	0.006082	0.007635	0.012619	0.009306	0.00041	0.005406	0.00495	0.011679	0.026946	0.012732	0.007679	0.016709	0.003656	0.010214	0.005402	0.02205	0.002426	0.007017	0.005055	0.023998	0.004531	0.019242	0.014251	0.007278	0.052148
Actinobacillus suis H91 0380 uid176363	0.052797	0.032093	0.015876	0.00859	0.003684	0.044593	0.018683	0.023455	0.01272	0.013792	0.015991	0.010444	0.003803	0.011517	0.011246	0.000484	0.002384	0.02284	0.00856	0.000524	0.052394	0.029194	0.015425	0.014917	0.013432	0.010528	0.004136	0.008003	0.00019	0.006162	0.003312	0.011621	0.038119	0.012552	0.007628	0.010384	0.007876	0.014939	0.00592	0.007279	0.009471	0.007962	0.001479	0.017993	0.0051	0.023842	0.008527	0.000994	0.050476
Actinoplanes missouriensis 431 uid158169	0.002583	0.001176	0.01806	0.016894	0.000433	0.001096	0.03581	0.016587	0.001831	0.001335	0.039716	0.019361	0.0006	0.001764	0.0153	0.00209	0.00023	0.002127	0.018302	0.0005	0.000184	0.00062	0.027168	0.003594	0.001548	0.000704	0.015322	0.0167	0.002335	0.000837	0.006071	0.015719	0.001486	0.002581	0.018179	0.026129	0.000529	0.002231	0.035701	0.06063	0.001574	0.001545	0.015609	0.041194	0.002951	0.006454	0.029937	0.036719	0.006971
Actinoplanes N902 109 uid202219	0.001577	0.00113	0.017514	0.016069	0.000303	0.001008	0.032792	0.015537	0.001714	0.001281	0.043024	0.018563	0.000535	0.001679	0.016515	0.001607	0.000196	0.002565	0.017564	0.000441	0.00014	0.000695	0.026247	0.005461	0.001283	0.000606	0.013142	0.017529	0.002332	0.000896	0.006187	0.015368	0.002229	0.002865	0.018836	0.027387	0.000528	0.00182	0.029361	0.065818	0.001761	0.001392	0.019284	0.03943	0.002408	0.004993	0.034638	0.034393	0.007634
Actinoplanes SE50 110 uid162333	0.00266	0.001449	0.017166	0.015045	0.000353	0.001193	0.034221	0.015837	0.00149	0.001257	0.045511	0.015729	0.000647	0.001979	0.014948	0.00198	0.000196	0.002777	0.01752	0.000514	0.000149	0.000775	0.026314	0.004319	0.001261	0.000637	0.013968	0.016171	0.002322	0.000984	0.006436	0.015647	0.001835	0.002777	0.019158	0.026392	0.000757	0.001802	0.028181	0.06795	0.001738	0.001251	0.01557	0.042985	0.003114	0.005097	0.031292	0.03909	0.007574
Actinosynnema mirum DSM 43827 uid58951	0.000473	0.000234	0.016494	0.016919	0.00016	0.000277	0.023987	0.012609	0.000642	0.000616	0.039975	0.016079	0.000431	0.000503	0.013746	0.006919	8.1e-05	0.000192	0.016691	0.000484	0.000106	0.000211	0.025956	0.003625	0.000674	0.000338	0.016436	0.018507	0.002321	0.000154	0.007128	0.015002	0.000778	0.00028	0.021639	0.024507	0.000239	0.000721	0.028205	0.074025	0.001225	0.001196	0.023095	0.03647	0.001796	0.001601	0.03876	0.032895	0.003767
Advenella kashmirensis WT001 uid80859	0.021351	0.017709	0.015248	0.017449	0.0054	0.025512	0.025926	0.026564	0.009579	0.006184	0.023836	0.015499	0.002887	0.006852	0.015582	0.003513	0.001334	0.0155	0.010475	0.000615	0.004122	0.021176	0.01602	0.018062	0.006976	0.006407	0.01129	0.012784	0.001916	0.00348	0.007389	0.013606	0.013856	0.013705	0.009294	0.030668	0.003526	0.011078	0.008659	0.056961	0.007393	0.007997	0.013803	0.019819	0.004571	0.012423	0.02594	0.010414	0.031066
Aequorivita sublithincola DSM 14238 uid168181	0.061648	0.038389	0.023687	0.016174	0.021323	0.045665	0.011764	0.022147	0.017158	0.018679	0.013982	0.007901	0.010523	0.013622	0.010413	0.002162	0.002046	0.027626	0.012197	0.00057	0.026142	0.038977	0.01422	0.022077	0.014058	0.014003	0.007773	0.00529	0.000389	0.004307	0.002914	0.010086	0.024066	0.00856	0.007379	0.008611	0.009558	0.02366	0.004798	0.005947	0.015156	0.01053	0.004085	0.004665	0.004939	0.008305	0.00566	0.001804	0.058176
Aerococcus urinae ACS 120 V Col10a uid64757	0.035193	0.029536	0.015268	0.027063	0.005825	0.042699	0.02252	0.023588	0.007058	0.015389	0.021466	0.005609	0.005411	0.015027	0.009584	0.002363	0.001984	0.026049	0.013688	0.000851	0.035762	0.028229	0.01289	0.016151	0.009541	0.011918	0.010756	0.004441	0.000296	0.003948	0.002227	0.008511	0.038042	0.012606	0.007898	0.011882	0.011487	0.011235	0.013837	0.010449	0.010457	0.012791	0.008103	0.004371	0.003534	0.011702	0.009214	0.008779	0.053694
Aeromonas hydrophila ATCC 7966 uid58617	0.00891	0.006716	0.023589	0.028975	0.002766	0.007055	0.04027	0.02532	0.001964	0.00343	0.03728	0.005379	0.001606	0.004044	0.023809	0.001948	0.00096	0.010207	0.015822	0.000326	0.001332	0.010102	0.025992	0.009303	0.002221	0.002821	0.015467	0.007719	0.001691	0.002552	0.008752	0.014673	0.007102	0.006408	0.016932	0.041519	0.001439	0.004048	0.027019	0.077573	0.002867	0.003239	0.018209	0.023006	0.001981	0.008976	0.030906	0.013423	0.017386
Aeromonas hydrophila ML09 119 uid205540	0.009521	0.006899	0.023607	0.029196	0.002632	0.007445	0.040288	0.025412	0.002086	0.003621	0.037128	0.005412	0.001574	0.004302	0.023458	0.001971	0.001035	0.010249	0.015836	0.000348	0.001407	0.010236	0.025716	0.009531	0.002235	0.002793	0.01521	0.007655	0.001736	0.002466	0.008676	0.014835	0.007564	0.006477	0.016697	0.041061	0.001609	0.004246	0.026714	0.076539	0.003052	0.003346	0.017763	0.022549	0.002117	0.009184	0.030837	0.013289	0.017696
Aeromonas salmonicida A449 uid58631	0.01193	0.009814	0.02124	0.027824	0.006638	0.009525	0.035203	0.026314	0.004733	0.005393	0.0324	0.006422	0.002242	0.006195	0.020991	0.002737	0.001145	0.012652	0.013808	0.000376	0.002067	0.01268	0.023548	0.013659	0.003581	0.004388	0.014828	0.006659	0.001663	0.003463	0.007717	0.015061	0.010604	0.008969	0.014701	0.037816	0.002015	0.006106	0.024465	0.071372	0.004662	0.00563	0.018169	0.018214	0.003322	0.012573	0.026962	0.011186	0.020853
Aeromonas veronii B565 uid66323	0.013416	0.009698	0.022206	0.02726	0.002548	0.010785	0.039137	0.026341	0.002901	0.005207	0.035819	0.004839	0.001799	0.006098	0.021352	0.001391	0.001245	0.012457	0.014069	0.000317	0.001871	0.01429	0.022107	0.011843	0.003159	0.004063	0.014542	0.007264	0.00152	0.003139	0.007889	0.014722	0.010087	0.008388	0.0146	0.037727	0.00207	0.006062	0.025767	0.070706	0.003744	0.004379	0.016953	0.021196	0.002486	0.011866	0.028382	0.01127	0.020168
Aeropyrum pernix K1 uid57757	0.008546	0.003851	0.015482	0.032732	0.037582	0.008299	0.010828	0.019679	0.009878	0.008238	0.013479	0.010314	0.011418	0.005744	0.024411	0.052397	0.000768	0.010936	0.024553	0.001879	0.004078	0.005616	0.023641	0.006909	0.005806	0.006771	0.011368	0.00836	0.000796	0.001836	0.004856	0.013143	0.002262	0.004262	0.010693	0.014533	0.020238	0.015346	0.034923	0.030041	0.007219	0.010869	0.020866	0.011907	0.001409	0.002521	0.004378	0.005257	0.011199
Aggregatibacter actinomycetemcomitans ANH9381 uid80743	0.052166	0.026782	0.019686	0.008119	0.003866	0.041556	0.022976	0.024074	0.007455	0.008025	0.025377	0.010546	0.003027	0.008664	0.012684	0.000673	0.002432	0.021568	0.010509	0.000579	0.035763	0.02588	0.019194	0.028969	0.005646	0.008265	0.014566	0.005614	0.000487	0.005063	0.005339	0.011654	0.033366	0.012025	0.00943	0.014587	0.004879	0.011961	0.007897	0.017542	0.005238	0.006979	0.004208	0.022142	0.00281	0.018245	0.017192	0.003941	0.049651
Aggregatibacter actinomycetemcomitans D11S 1 uid41333	0.052316	0.026786	0.01978	0.008295	0.003894	0.041515	0.022898	0.023914	0.007537	0.008042	0.025274	0.010606	0.003189	0.008767	0.01287	0.00065	0.002488	0.021577	0.01049	0.00056	0.035741	0.026038	0.018846	0.029099	0.005652	0.008179	0.014584	0.005616	0.000557	0.004894	0.005382	0.011804	0.033578	0.011941	0.009417	0.014777	0.004785	0.011972	0.007811	0.01775	0.005289	0.006957	0.004196	0.022059	0.002775	0.018179	0.017439	0.003955	0.049606
Aggregatibacter actinomycetemcomitans D7S 1 uid46989	0.052088	0.027544	0.019234	0.009088	0.004529	0.041313	0.022248	0.023664	0.007905	0.008008	0.024467	0.010772	0.003597	0.009076	0.012899	0.000967	0.002426	0.022674	0.010227	0.000644	0.035443	0.02664	0.018542	0.028425	0.005864	0.00822	0.014103	0.005641	0.000559	0.005018	0.005382	0.012078	0.033289	0.012524	0.009213	0.014857	0.005188	0.012049	0.00768	0.01771	0.005385	0.007264	0.004402	0.021882	0.002974	0.017882	0.016598	0.004194	0.049776
Aggregatibacter aphrophilus NJ8700 uid59407	0.052303	0.029125	0.01832	0.008791	0.004471	0.043862	0.019497	0.023884	0.01042	0.010607	0.021112	0.009995	0.003132	0.010647	0.011318	0.000548	0.002385	0.0234	0.009267	0.000552	0.041071	0.028785	0.016378	0.02844	0.007079	0.011429	0.011435	0.004751	0.000417	0.005941	0.004433	0.012025	0.037314	0.013244	0.008627	0.010904	0.006884	0.013076	0.007011	0.009416	0.009422	0.008487	0.003255	0.017544	0.003604	0.020843	0.013375	0.003155	0.049404
Agrobacterium fabrum C58 uid57865	0.011482	0.012858	0.016841	0.029642	0.002591	0.012693	0.042767	0.026342	0.00459	0.002553	0.025955	0.020004	0.001828	0.002207	0.014037	0.003287	0.000869	0.014372	0.008563	0.000351	0.00081	0.010801	0.029705	0.007422	0.003123	0.003173	0.018061	0.017525	0.002103	0.001495	0.006292	0.011866	0.004669	0.0112	0.008553	0.025886	0.001392	0.017054	0.026557	0.044724	0.002989	0.004758	0.012728	0.026785	0.002291	0.011749	0.033497	0.011655	0.034717
Agrobacterium H13 3 uid63403	0.011917	0.011816	0.018186	0.029493	0.003132	0.013388	0.041504	0.026302	0.005431	0.003048	0.024801	0.02016	0.002105	0.002368	0.014047	0.003614	0.000868	0.013243	0.00966	0.000383	0.000793	0.010956	0.029494	0.008678	0.00327	0.003548	0.018049	0.017243	0.002052	0.001523	0.006247	0.011844	0.005088	0.010652	0.009068	0.025498	0.001612	0.019354	0.024273	0.043046	0.003784	0.005174	0.012177	0.026078	0.002572	0.011695	0.033019	0.010908	0.034664
Agrobacterium radiobacter K84 uid58269	0.007549	0.012337	0.017242	0.031774	0.002195	0.009821	0.046504	0.025338	0.004263	0.002879	0.02591	0.021089	0.001588	0.00236	0.015485	0.003107	0.000837	0.014762	0.009069	0.000587	0.000732	0.008296	0.03077	0.009205	0.00262	0.002592	0.015373	0.019422	0.001829	0.001262	0.006475	0.012567	0.005714	0.012736	0.007868	0.026018	0.002164	0.012973	0.028736	0.044858	0.003663	0.003659	0.011547	0.029516	0.002958	0.009415	0.035859	0.01146	0.02717
Agrobacterium vitis S4 uid58249	0.012937	0.015646	0.013783	0.027024	0.002299	0.017424	0.03617	0.025935	0.006484	0.003603	0.028399	0.016473	0.001888	0.003774	0.01587	0.003075	0.000886	0.015551	0.007528	0.000359	0.001414	0.015119	0.023042	0.014575	0.004318	0.004499	0.015706	0.015868	0.00182	0.001815	0.006396	0.012068	0.009157	0.013777	0.006694	0.025571	0.002447	0.013894	0.016096	0.051274	0.006748	0.006145	0.011695	0.023607	0.003348	0.009864	0.029557	0.015778	0.031934
Agromonas oligotrophica S58 uid192186	0.004077	0.008309	0.018263	0.028931	0.000789	0.005201	0.046162	0.023055	0.002545	0.001991	0.029262	0.02111	0.001086	0.00183	0.017282	0.003329	0.000324	0.010757	0.011213	0.000665	0.000322	0.005031	0.031219	0.007915	0.002206	0.001553	0.011579	0.02229	0.002065	0.001182	0.007411	0.013072	0.004239	0.009621	0.010635	0.028633	0.001008	0.004999	0.033109	0.052764	0.002864	0.00308	0.012737	0.034008	0.002943	0.006469	0.040093	0.015936	0.012913
Akkermansia muciniphila ATCC BAA 835 uid58985	0.024295	0.015471	0.020793	0.023195	0.004733	0.022038	0.026564	0.028314	0.005069	0.005594	0.020574	0.020691	0.003891	0.003021	0.013937	0.008739	0.001304	0.013071	0.016452	0.000377	0.002474	0.016115	0.023522	0.010652	0.002804	0.006105	0.034222	0.002663	0.001082	0.002858	0.011187	0.014447	0.00673	0.011218	0.00947	0.025244	0.001113	0.014738	0.015077	0.054757	0.002077	0.008456	0.021363	0.018933	0.001365	0.008447	0.025956	0.01387	0.045972
Alcanivorax borkumensis SK2 uid58169	0.020464	0.014766	0.018616	0.01778	0.003519	0.023617	0.022179	0.02585	0.005415	0.008313	0.027788	0.009019	0.001685	0.008454	0.018078	0.001883	0.001353	0.01215	0.013336	0.000485	0.00774	0.018616	0.017682	0.02494	0.004796	0.007309	0.012104	0.00652	0.001183	0.004193	0.005752	0.014468	0.016904	0.011225	0.012141	0.028363	0.010238	0.010586	0.011177	0.046063	0.007303	0.008507	0.013485	0.017608	0.005702	0.016718	0.024622	0.010896	0.035968
Alcanivorax dieselolei B5 uid176364	0.011388	0.009866	0.018615	0.017213	0.001837	0.010806	0.030967	0.023619	0.00258	0.003959	0.034263	0.009707	0.001438	0.005849	0.017278	0.002008	0.000739	0.010544	0.015169	0.000459	0.002182	0.008598	0.026206	0.017161	0.002478	0.002231	0.017314	0.008374	0.001813	0.002736	0.006462	0.015203	0.010655	0.009854	0.013099	0.029659	0.001758	0.005881	0.013688	0.071417	0.003597	0.003674	0.015183	0.027966	0.003399	0.014151	0.031514	0.020664	0.030529
Alicycliphilus denitrificans BC uid49953	0.003193	0.002793	0.02056	0.026802	0.002012	0.003161	0.035982	0.025278	0.001603	0.001374	0.024812	0.020812	0.00049	0.001205	0.020263	0.002792	0.000367	0.003526	0.018383	0.000385	0.000253	0.003344	0.029069	0.005153	0.000993	0.001109	0.01097	0.014242	0.00232	0.000534	0.009209	0.014665	0.004528	0.005142	0.018188	0.038828	0.001037	0.002814	0.020419	0.077484	0.002197	0.002567	0.026937	0.022516	0.00125	0.003445	0.053898	0.010356	0.012417
Alicycliphilus denitrificans K601 uid66307	0.003294	0.002997	0.02036	0.026757	0.001947	0.00333	0.035811	0.024846	0.001712	0.001417	0.024931	0.02065	0.000529	0.001383	0.019917	0.002812	0.000362	0.00369	0.018353	0.000385	0.00029	0.003551	0.029301	0.005835	0.001138	0.001157	0.011013	0.014474	0.002315	0.000613	0.009229	0.014766	0.004937	0.005473	0.018209	0.038261	0.001114	0.003037	0.020739	0.076817	0.002407	0.002621	0.026091	0.023152	0.001617	0.003754	0.053169	0.011196	0.012889
Alicyclobacillus acidocaldarius DSM 446 uid59199	0.007113	0.006804	0.01758	0.023236	0.001215	0.013416	0.034669	0.024685	0.003791	0.001863	0.015192	0.027342	0.002085	0.003025	0.013311	0.004487	0.000463	0.008987	0.019201	0.000368	0.001451	0.01355	0.022124	0.014992	0.002262	0.003284	0.011806	0.018851	0.002424	0.002253	0.006662	0.015966	0.008803	0.007229	0.016697	0.02613	0.001646	0.011684	0.03769	0.032817	0.004228	0.005698	0.013593	0.026702	0.008852	0.005118	0.035986	0.020281	0.020448
Alicyclobacillus acidocaldarius Tc 4 1 uid158681	0.007817	0.007422	0.017136	0.022988	0.001366	0.015	0.032349	0.024682	0.004421	0.002397	0.015007	0.026698	0.002225	0.003503	0.013014	0.004581	0.000532	0.009544	0.018576	0.000413	0.001642	0.014372	0.021154	0.01592	0.002832	0.003572	0.011575	0.018432	0.002547	0.002619	0.006694	0.015779	0.009783	0.007843	0.016599	0.025452	0.002195	0.012287	0.036066	0.031741	0.005143	0.0063	0.013081	0.025302	0.009345	0.006067	0.035073	0.020201	0.022287
Aliivibrio salmonicida LFI1238 uid59251	0.046958	0.028921	0.015911	0.01314	0.010269	0.040629	0.018889	0.02673	0.016273	0.01599	0.010816	0.012049	0.005653	0.013823	0.008815	0.001111	0.002344	0.019237	0.011277	0.000528	0.043368	0.030153	0.011746	0.014289	0.016698	0.018429	0.002785	0.00547	0.000392	0.008075	0.003244	0.01229	0.033658	0.014914	0.007717	0.007908	0.012359	0.020513	0.004781	0.007505	0.01574	0.015135	0.00234	0.004598	0.007605	0.02132	0.007061	0.000985	0.047629
Alistipes finegoldii DSM 17242 uid168180	0.023066	0.012528	0.028108	0.027852	0.007045	0.01183	0.040066	0.025722	0.005031	0.003952	0.022486	0.026588	0.002541	0.003637	0.01341	0.002873	0.001457	0.015701	0.025577	0.000631	0.002982	0.00865	0.03389	0.007832	0.002453	0.002786	0.009618	0.025907	0.000802	0.003106	0.009955	0.012607	0.006157	0.006823	0.010678	0.024937	0.001538	0.009071	0.024522	0.042773	0.001224	0.00404	0.016709	0.018944	0.002885	0.009492	0.030399	0.015028	0.031183
Alistipes shahii WAL 8301 uid197175	0.021877	0.010672	0.029827	0.028588	0.005325	0.011043	0.041307	0.025443	0.004387	0.003138	0.022909	0.027172	0.002004	0.003055	0.012827	0.002698	0.001416	0.013508	0.027214	0.000636	0.002531	0.007787	0.034966	0.008287	0.001898	0.002119	0.009434	0.027418	0.00089	0.002569	0.010328	0.013153	0.005913	0.00574	0.01179	0.024406	0.001331	0.008395	0.02514	0.04316	0.000997	0.003426	0.017568	0.018788	0.002709	0.009059	0.031758	0.015822	0.028481
Alkalilimnicola ehrlichii MLHE 1 uid58467	0.003501	0.004637	0.017868	0.017552	0.001146	0.004739	0.034134	0.021529	0.001607	0.001627	0.035315	0.008629	0.000654	0.003664	0.016524	0.001902	0.000464	0.005302	0.017959	0.000431	0.000794	0.006096	0.025293	0.009951	0.001574	0.00107	0.012712	0.008483	0.002003	0.00198	0.007278	0.015247	0.00533	0.005609	0.019787	0.032481	0.001915	0.003972	0.021572	0.074791	0.002652	0.00224	0.022293	0.027691	0.00333	0.008126	0.041418	0.031155	0.012421
Alkaliphilus metalliredigens QYMF uid58171	0.046047	0.035317	0.012843	0.027404	0.023923	0.047358	0.018638	0.029369	0.021842	0.012612	0.012071	0.005467	0.018221	0.015721	0.007339	0.006735	0.001943	0.028328	0.008375	0.000992	0.035298	0.032409	0.008674	0.015375	0.012122	0.012947	0.007019	0.002767	0.000467	0.006641	0.002537	0.00783	0.023596	0.014554	0.004297	0.011197	0.015691	0.015005	0.004773	0.008093	0.012035	0.011447	0.005825	0.00258	0.005947	0.004937	0.001813	0.002592	0.054272
Alkaliphilus oremlandii OhILAs uid58495	0.04952	0.038459	0.013438	0.028154	0.026024	0.044146	0.024707	0.027994	0.019109	0.011805	0.011561	0.008127	0.020003	0.013514	0.009417	0.005614	0.002017	0.028157	0.009189	0.000948	0.03567	0.030812	0.010362	0.014784	0.00869	0.014788	0.009698	0.003266	0.000273	0.006361	0.003016	0.00695	0.01802	0.013688	0.004012	0.011164	0.014554	0.013655	0.004478	0.009718	0.012541	0.010043	0.003927	0.004577	0.005734	0.003763	0.001382	0.002069	0.05391
Allochromatium vinosum DSM 180 uid46083	0.004785	0.007963	0.015887	0.020417	0.000907	0.004091	0.044718	0.020796	0.003274	0.002349	0.029613	0.015876	0.001102	0.005236	0.014866	0.001712	0.000264	0.013314	0.009423	0.000365	0.000759	0.004838	0.028456	0.007896	0.002592	0.001453	0.010166	0.017462	0.002235	0.003264	0.006242	0.013853	0.005557	0.01136	0.011703	0.031075	0.001687	0.002878	0.035616	0.067575	0.003575	0.002662	0.017646	0.029454	0.004242	0.01432	0.042796	0.017304	0.019398
alpha proteobacterium HIMB5 uid175779	0.092739	0.055877	0.012309	0.013146	0.031302	0.055102	0.008888	0.021045	0.022023	0.020226	0.002944	0.002035	0.027118	0.01428	0.004182	0.002311	0.002417	0.027521	0.007036	0.000409	0.05509	0.047312	0.006781	0.010355	0.025102	0.020444	0.002091	0.00213	0.000483	0.008007	0.001846	0.009245	0.022934	0.011981	0.00356	0.003393	0.009277	0.015804	0.001638	0.001598	0.016849	0.011988	0.001526	0.001265	0.001365	0.00124	0.00012	0.000113	0.050018
alpha proteobacterium HIMB59 uid175778	0.071217	0.051163	0.013362	0.014502	0.023074	0.054991	0.016184	0.021295	0.015726	0.019818	0.007051	0.003273	0.017379	0.013494	0.006278	0.002446	0.002274	0.027935	0.008519	0.000473	0.046575	0.047282	0.0096	0.011361	0.020527	0.024723	0.006056	0.003335	0.000539	0.007225	0.002461	0.009008	0.02819	0.013701	0.004759	0.006177	0.011218	0.020639	0.0056	0.003654	0.011823	0.014896	0.004665	0.001997	0.004955	0.004352	0.001671	0.000383	0.043588
Alteromonas macleodii AltDE1 uid179068	0.035221	0.021326	0.023204	0.018311	0.012005	0.033184	0.014991	0.0242	0.012786	0.012363	0.017922	0.013062	0.00602	0.012661	0.016012	0.002702	0.001836	0.016023	0.014388	0.000747	0.024984	0.028152	0.013875	0.015245	0.012986	0.013824	0.003663	0.009122	0.000433	0.005259	0.004236	0.012069	0.024547	0.010206	0.011597	0.016638	0.014486	0.024817	0.006794	0.012557	0.010985	0.013639	0.006665	0.007876	0.006002	0.012654	0.0148	0.002862	0.042302
Alteromonas macleodii ATCC 27126 uid55253	0.03412	0.021454	0.024069	0.018297	0.011173	0.033505	0.015063	0.023827	0.0136	0.013315	0.017085	0.013008	0.006226	0.012897	0.016173	0.002301	0.001761	0.015813	0.014636	0.00077	0.023072	0.027488	0.014967	0.01612	0.013753	0.014405	0.003524	0.009056	0.000351	0.005087	0.004039	0.011775	0.02413	0.009979	0.011453	0.016568	0.014684	0.024922	0.006659	0.012924	0.011624	0.014005	0.005784	0.007245	0.00588	0.012987	0.014047	0.001965	0.042934
Alteromonas macleodii Balearic Sea AD45 uid176366	0.034524	0.021383	0.023779	0.018508	0.011441	0.033486	0.015185	0.023945	0.013507	0.013117	0.016769	0.012864	0.006423	0.012955	0.016115	0.002417	0.001759	0.015935	0.014539	0.000758	0.02315	0.027607	0.014939	0.016221	0.01376	0.014471	0.003568	0.009168	0.000394	0.005197	0.004142	0.011815	0.024219	0.010113	0.011526	0.016706	0.014759	0.024999	0.006796	0.01301	0.011579	0.013992	0.005763	0.007212	0.005929	0.013006	0.014205	0.00205	0.042858
Alteromonas macleodii Black Sea 11 uid176365	0.034555	0.021262	0.023661	0.01876	0.011473	0.033443	0.015279	0.024144	0.013396	0.013547	0.016933	0.012174	0.006439	0.012798	0.015881	0.002515	0.001787	0.015787	0.014706	0.000736	0.023533	0.027159	0.015019	0.015993	0.013629	0.014431	0.003569	0.008943	0.000377	0.005162	0.004057	0.011814	0.024108	0.009933	0.011709	0.016793	0.015179	0.024987	0.006492	0.012846	0.011668	0.014015	0.005844	0.007251	0.005966	0.013201	0.014368	0.001978	0.04329
Alteromonas macleodii Deep ecotype uid58251	0.035784	0.021099	0.02333	0.018275	0.012421	0.032782	0.015039	0.02443	0.012782	0.012444	0.018	0.013105	0.00606	0.012626	0.016062	0.002727	0.001972	0.015823	0.014419	0.000788	0.025237	0.028378	0.013995	0.014954	0.01292	0.013776	0.003631	0.009169	0.000506	0.005295	0.004385	0.01194	0.024496	0.010156	0.011617	0.016543	0.014794	0.024875	0.006815	0.012472	0.010848	0.013418	0.006664	0.007804	0.005929	0.012535	0.014863	0.002859	0.042382
Alteromonas macleodii English Channel 615 uid210781	0.035775	0.020989	0.023287	0.0183	0.012131	0.033186	0.014831	0.024387	0.012718	0.012336	0.018017	0.012873	0.00596	0.012461	0.016077	0.002652	0.002022	0.015897	0.014404	0.000849	0.025187	0.028536	0.013777	0.015041	0.012756	0.013931	0.003563	0.009073	0.000479	0.00529	0.004403	0.011855	0.024356	0.0103	0.011836	0.01672	0.014659	0.025258	0.006732	0.012523	0.010719	0.013469	0.006797	0.007835	0.005869	0.012669	0.014773	0.002805	0.0424
Alteromonas macleodii English Channel 673 uid176367	0.03398	0.021314	0.023936	0.01823	0.010977	0.033571	0.015196	0.023968	0.013723	0.013288	0.017326	0.013116	0.006217	0.012861	0.016211	0.002342	0.001769	0.015623	0.01461	0.000746	0.022888	0.027191	0.015017	0.016157	0.013744	0.014361	0.003488	0.009069	0.00038	0.005061	0.004077	0.011647	0.024195	0.009923	0.011543	0.016601	0.014773	0.02499	0.00674	0.013122	0.011683	0.014026	0.005809	0.007284	0.005824	0.013019	0.014235	0.002005	0.042808
Alteromonas macleodii Ionian Sea U4 uid210780	0.035441	0.021181	0.02342	0.018195	0.012145	0.033382	0.014915	0.024395	0.012754	0.012237	0.018148	0.013072	0.005966	0.012441	0.016103	0.002548	0.001893	0.015865	0.014446	0.000787	0.025168	0.028282	0.01377	0.014959	0.01294	0.014	0.003588	0.009199	0.000468	0.005174	0.004264	0.011783	0.024422	0.010157	0.011755	0.016459	0.014638	0.025148	0.006715	0.012331	0.010876	0.013615	0.00668	0.007778	0.005857	0.012585	0.014939	0.002747	0.042382
Alteromonas macleodii Ionian Sea U7 uid210785	0.035565	0.021276	0.023357	0.018271	0.012176	0.033169	0.014988	0.024256	0.012754	0.012266	0.01802	0.01297	0.006066	0.012458	0.016038	0.002718	0.001862	0.015922	0.014475	0.000762	0.025039	0.028346	0.013795	0.015315	0.013023	0.01398	0.003709	0.009152	0.000476	0.005248	0.004311	0.011831	0.02454	0.010263	0.011736	0.016659	0.014525	0.025024	0.006761	0.012626	0.010885	0.013555	0.006734	0.00778	0.00591	0.012537	0.014811	0.002815	0.042489
Alteromonas macleodii Ionian Sea U8 uid210782	0.035397	0.021201	0.023353	0.01809	0.012128	0.033345	0.014961	0.024371	0.012721	0.012191	0.018164	0.013006	0.005991	0.012445	0.016101	0.002681	0.001883	0.015881	0.014479	0.000776	0.025072	0.028415	0.013784	0.015313	0.012956	0.013893	0.003683	0.0092	0.000465	0.005237	0.004319	0.011795	0.024514	0.010245	0.011787	0.016636	0.014527	0.025133	0.00673	0.012633	0.010841	0.013567	0.006771	0.007781	0.005891	0.012543	0.014855	0.002778	0.042292
Alteromonas macleodii Ionian Sea UM4b uid210784	0.035457	0.021177	0.023221	0.018336	0.011977	0.033268	0.014977	0.024261	0.012687	0.012304	0.017852	0.013043	0.00595	0.012561	0.015955	0.002682	0.001859	0.01598	0.014382	0.000755	0.025146	0.028282	0.013818	0.01531	0.012938	0.013904	0.003622	0.00914	0.000437	0.005301	0.004256	0.012052	0.024528	0.010254	0.011692	0.0166	0.014583	0.025016	0.006722	0.012602	0.010971	0.013671	0.006609	0.007879	0.005947	0.012782	0.014845	0.002833	0.042295
Alteromonas macleodii Ionian Sea UM7 uid210783	0.035305	0.021349	0.023242	0.018284	0.01203	0.03319	0.014926	0.024184	0.012793	0.012369	0.017954	0.013066	0.006014	0.012652	0.016017	0.002701	0.001838	0.015993	0.014375	0.000749	0.025024	0.02815	0.013828	0.015242	0.012999	0.013861	0.003654	0.009124	0.000437	0.005256	0.004244	0.012028	0.024591	0.01018	0.011586	0.016618	0.014504	0.024792	0.006731	0.01251	0.011005	0.013665	0.006653	0.007865	0.005963	0.01265	0.014809	0.002827	0.042334
Alteromonas SN2 uid67349	0.035879	0.023664	0.021316	0.016272	0.012676	0.0362	0.012904	0.024077	0.012263	0.014513	0.019705	0.010962	0.006277	0.014505	0.014949	0.002657	0.001781	0.017126	0.013811	0.000775	0.03037	0.028369	0.013754	0.017767	0.013846	0.014691	0.00391	0.008557	0.000492	0.005275	0.004172	0.012027	0.027209	0.012396	0.009533	0.013598	0.014144	0.021415	0.005917	0.010572	0.011151	0.014717	0.0065	0.006272	0.006372	0.013899	0.011823	0.00295	0.044108
Aminobacterium colombiense DSM 12261 uid47083	0.036569	0.018764	0.01435	0.020435	0.021738	0.031504	0.017627	0.02693	0.015995	0.011924	0.012341	0.007597	0.011571	0.007967	0.011369	0.007861	0.001556	0.019074	0.01001	0.00081	0.011765	0.029216	0.01366	0.014774	0.010499	0.017164	0.010614	0.004649	0.000773	0.006202	0.00603	0.012722	0.011227	0.012802	0.006459	0.018061	0.006075	0.039974	0.016027	0.015424	0.009367	0.015755	0.011984	0.005858	0.007555	0.010234	0.008507	0.007346	0.047526
Ammonifex degensii KC4 uid41053	0.014185	0.004394	0.017927	0.033515	0.013951	0.008511	0.023182	0.015465	0.002594	0.006177	0.024421	0.010367	0.0041	0.003604	0.012956	0.012497	0.001258	0.006145	0.022502	0.000884	0.006401	0.013361	0.024882	0.016039	0.001554	0.006214	0.013369	0.006874	0.001167	0.002943	0.009841	0.01408	0.005471	0.003693	0.013848	0.022862	0.006308	0.019358	0.026564	0.045139	0.002944	0.010555	0.021562	0.018245	0.003399	0.006063	0.025627	0.027823	0.029897
Amphibacillus xylanus NBRC 15112 uid176453	0.046602	0.035339	0.01238	0.018873	0.013296	0.053575	0.017806	0.023993	0.026017	0.014689	0.003741	0.010119	0.011287	0.014617	0.0054	0.002309	0.002344	0.029573	0.008876	0.000507	0.047931	0.033224	0.010316	0.010907	0.020126	0.010812	0.002165	0.0043	0.00047	0.004442	0.001276	0.009068	0.03431	0.015245	0.005709	0.009475	0.014275	0.015468	0.00473	0.00416	0.017371	0.009837	0.001257	0.005461	0.009439	0.01258	0.004537	0.002429	0.054435
Amycolatopsis mediterranei RB uid216089	0.001777	0.000664	0.01854	0.01985	0.000166	0.000826	0.031972	0.01426	0.001217	0.001156	0.035317	0.023788	0.00038	0.001261	0.01379	0.001563	0.000182	0.000827	0.019729	0.000526	6.7e-05	0.000568	0.029332	0.004901	0.000877	0.000535	0.01321	0.019924	0.002328	0.000565	0.006886	0.015448	0.001648	0.000825	0.021168	0.02569	0.000317	0.001557	0.035669	0.062575	0.0013	0.001109	0.016224	0.041409	0.00205	0.003429	0.035696	0.033383	0.015268
Amycolatopsis mediterranei S699 uid158689	0.001807	0.000673	0.018476	0.019847	0.000173	0.000844	0.031945	0.014235	0.001225	0.001171	0.03522	0.023754	0.000388	0.001288	0.013813	0.001606	0.000191	0.000848	0.019683	0.000555	7.4e-05	0.000588	0.029268	0.004944	0.00089	0.000557	0.013231	0.019923	0.002382	0.000584	0.006934	0.015479	0.001669	0.00085	0.021174	0.025652	0.000334	0.001583	0.035614	0.062338	0.001307	0.001151	0.016213	0.041372	0.002121	0.003487	0.035731	0.033446	0.015314
Amycolatopsis mediterranei S699 uid171830	0.001775	0.00066	0.018526	0.019861	0.000166	0.000824	0.031975	0.014264	0.001214	0.00115	0.03532	0.023792	0.000376	0.001261	0.013784	0.001557	0.000182	0.000825	0.019737	0.000527	6.5e-05	0.000566	0.02934	0.004895	0.000873	0.000534	0.013219	0.019937	0.002325	0.000564	0.006885	0.015456	0.001645	0.000818	0.021176	0.025686	0.000311	0.001554	0.035678	0.062556	0.001288	0.001103	0.016228	0.041415	0.002036	0.003423	0.035698	0.03339	0.015272
Amycolatopsis mediterranei U32 uid50565	0.001777	0.000661	0.018533	0.01985	0.000165	0.000825	0.031963	0.014251	0.001219	0.001154	0.03533	0.023791	0.000376	0.001261	0.013782	0.001561	0.000181	0.000825	0.019725	0.000525	6.7e-05	0.000567	0.029316	0.0049	0.000876	0.000534	0.013223	0.019938	0.002324	0.000564	0.006885	0.015449	0.001649	0.000821	0.021174	0.025687	0.000314	0.001553	0.035659	0.062547	0.001288	0.001107	0.016229	0.041416	0.002041	0.003427	0.035687	0.033387	0.015277
Amycolatopsis orientalis HCCB10007 uid203791	0.003935	0.001451	0.018196	0.021863	0.00034	0.000987	0.035114	0.015778	0.001827	0.001662	0.035429	0.020592	0.000746	0.001983	0.012862	0.004097	0.000226	0.002418	0.017588	0.000574	0.000213	0.00071	0.029497	0.007038	0.001313	0.000873	0.014807	0.0207	0.002211	0.001047	0.00627	0.015028	0.002458	0.003912	0.016903	0.023769	0.000583	0.003535	0.038966	0.054632	0.001592	0.002151	0.016914	0.037369	0.003174	0.00677	0.030472	0.030306	0.020284
Amycolicicoccus subflavus DQS3 9A1 uid67253	0.00737	0.005774	0.016389	0.015292	0.002795	0.009626	0.034234	0.019229	0.009055	0.007998	0.022673	0.019259	0.002035	0.005389	0.013736	0.003722	0.000519	0.005254	0.015489	0.000813	0.001423	0.005378	0.02653	0.008862	0.007234	0.004308	0.011931	0.015978	0.001829	0.002048	0.005722	0.014272	0.006296	0.006737	0.015696	0.023419	0.004124	0.012491	0.037869	0.034913	0.008725	0.007054	0.015602	0.022942	0.007604	0.011744	0.028086	0.019163	0.026061
Anabaena 90 uid179383	0.043042	0.03814	0.012105	0.011296	0.014088	0.04741	0.013451	0.017842	0.019171	0.02183	0.012042	0.004196	0.010309	0.018087	0.006844	0.002802	0.002089	0.024138	0.007792	0.000906	0.049506	0.032333	0.00829	0.019426	0.010851	0.017979	0.007229	0.002788	0.000705	0.00754	0.002462	0.014115	0.040738	0.013187	0.005181	0.012004	0.011635	0.010566	0.008266	0.009159	0.014052	0.01591	0.010973	0.004059	0.006011	0.011073	0.008476	0.006616	0.051879
Anabaena cylindrica PCC 7122 uid183339	0.040683	0.035218	0.013695	0.01127	0.014196	0.044626	0.014864	0.018011	0.019574	0.021946	0.012116	0.004116	0.009881	0.017063	0.008382	0.002984	0.001728	0.022364	0.008902	0.000751	0.043906	0.031582	0.008417	0.020963	0.011318	0.017781	0.006495	0.003175	0.000639	0.006756	0.002817	0.013849	0.039987	0.012226	0.005755	0.013516	0.013375	0.010692	0.009266	0.011022	0.014897	0.015733	0.010051	0.003865	0.006352	0.012255	0.009392	0.005699	0.051128
Anabaena variabilis ATCC 29413 uid58043	0.034083	0.029654	0.015544	0.01239	0.011502	0.039694	0.017599	0.017193	0.019392	0.020347	0.013739	0.004892	0.008802	0.016394	0.009649	0.003348	0.001499	0.019698	0.010764	0.000856	0.039914	0.028871	0.009974	0.022356	0.010037	0.01552	0.007764	0.004016	0.000557	0.006247	0.003113	0.014319	0.039967	0.011496	0.007162	0.015344	0.014772	0.009148	0.010542	0.01311	0.015794	0.014493	0.01198	0.004626	0.006562	0.012768	0.012385	0.006399	0.046432
Anaerobaculum mobile DSM 13181 uid168323	0.026367	0.014635	0.017908	0.034971	0.032968	0.017057	0.020852	0.027239	0.007825	0.007982	0.014273	0.01362	0.011023	0.004472	0.015747	0.021276	0.00129	0.015464	0.015102	0.000741	0.015171	0.02545	0.015066	0.027276	0.007201	0.009146	0.012895	0.010071	0.001045	0.005357	0.007988	0.01181	0.011758	0.010167	0.007203	0.013744	0.007318	0.026185	0.010758	0.01827	0.007314	0.011098	0.015335	0.009585	0.004823	0.00513	0.008286	0.002994	0.035807
Anaerococcus prevotii DSM 20548 uid59219	0.047707	0.036367	0.017739	0.041643	0.037755	0.029466	0.024185	0.025039	0.019609	0.015664	0.009167	0.002192	0.023838	0.010497	0.009447	0.011817	0.001811	0.026062	0.015254	0.000768	0.019435	0.030781	0.015096	0.009126	0.015861	0.017753	0.007571	0.002301	0.000474	0.004515	0.002743	0.005721	0.017392	0.006265	0.006222	0.004109	0.023942	0.028538	0.007828	0.002305	0.014281	0.009909	0.002079	0.00119	0.000657	0.002048	0.00053	7e-05	0.057411
Anaerolinea thermophila UNI 1 uid62245	0.021773	0.014065	0.016754	0.013508	0.003035	0.031213	0.022742	0.023419	0.006729	0.007974	0.027494	0.010202	0.003914	0.007383	0.011533	0.003014	0.001274	0.013214	0.016581	0.000497	0.00936	0.021467	0.01962	0.020584	0.00484	0.009201	0.012094	0.00906	0.001142	0.003532	0.004623	0.017009	0.016724	0.010934	0.009429	0.025067	0.002235	0.014456	0.015378	0.052985	0.006609	0.012595	0.020002	0.016277	0.005061	0.012547	0.030219	0.009869	0.042679
Anaeromyxobacter dehalogenans 2CP 1 uid58989	0.000201	0.000274	0.015008	0.023237	7.5e-05	0.000248	0.029381	0.015602	0.000252	0.000267	0.025997	0.017855	0.000238	0.000199	0.01106	0.002161	6.9e-05	0.000595	0.01763	0.000991	3.2e-05	0.000302	0.029295	0.000893	0.000342	0.000338	0.011953	0.018299	0.0019	0.000254	0.008617	0.01288	0.000357	0.000673	0.018863	0.024466	0.000227	0.000854	0.055013	0.051304	0.000864	0.001196	0.020046	0.041104	0.00176	0.001779	0.056521	0.030435	0.001506
Anaeromyxobacter dehalogenans 2CP C uid58135	0.000237	0.000263	0.014958	0.023092	9.2e-05	0.000284	0.028878	0.015434	0.000299	0.000315	0.025526	0.017611	0.000284	0.000248	0.010984	0.002149	6.7e-05	0.000485	0.017703	0.001009	3.4e-05	0.000323	0.029208	0.000886	0.000381	0.000357	0.01194	0.01807	0.001781	0.000239	0.008573	0.012801	0.000432	0.000664	0.018908	0.024259	0.000268	0.000963	0.055464	0.050703	0.000851	0.001214	0.020219	0.041182	0.001774	0.001672	0.05713	0.030583	0.001637
Anaeromyxobacter Fw109 5 uid58755	0.000286	0.000484	0.015095	0.023494	0.000159	0.000356	0.030711	0.014951	0.000404	0.000517	0.022323	0.022421	0.000506	0.000324	0.012579	0.004035	7.6e-05	0.000952	0.01763	0.00089	4e-05	0.000458	0.029992	0.001355	0.000528	0.000782	0.013343	0.01917	0.001856	0.000474	0.008709	0.012595	0.000545	0.001199	0.018904	0.023395	0.000355	0.001275	0.070902	0.033514	0.001352	0.002342	0.022136	0.035336	0.003556	0.003185	0.053596	0.028985	0.002211
Anaeromyxobacter K uid58953	0.00019	0.000281	0.014987	0.02303	8.6e-05	0.000269	0.029411	0.01545	0.000244	0.000265	0.026227	0.0177	0.000241	0.000193	0.011068	0.002033	6e-05	0.000568	0.017646	0.000982	2.7e-05	0.000295	0.029414	0.000824	0.000317	0.000322	0.011996	0.018351	0.00188	0.000245	0.008766	0.012891	0.000329	0.000614	0.018937	0.024328	0.000194	0.000834	0.054963	0.051706	0.000797	0.001061	0.020088	0.041498	0.00156	0.00158	0.056571	0.030234	0.001367
Anaplasma centrale Israel uid42155	0.021072	0.015531	0.017199	0.02944	0.025281	0.018448	0.013421	0.025151	0.012019	0.012288	0.013445	0.009534	0.011083	0.012769	0.01889	0.0182	0.000655	0.013625	0.015676	0.001334	0.007857	0.023584	0.014628	0.02034	0.009855	0.015968	0.013462	0.008359	0.000735	0.00817	0.01036	0.008244	0.012161	0.009755	0.01302	0.017081	0.011677	0.016069	0.011815	0.024785	0.009106	0.009121	0.009451	0.009445	0.002837	0.007698	0.010835	0.006697	0.026148
Anaplasma marginale Florida uid58577	0.022948	0.015883	0.017704	0.02816	0.025675	0.01882	0.013448	0.025258	0.011977	0.012186	0.013663	0.009349	0.011175	0.012402	0.019088	0.017052	0.000702	0.013861	0.015475	0.001395	0.008419	0.024166	0.014497	0.020833	0.010016	0.016271	0.012886	0.008411	0.000641	0.008242	0.010855	0.008542	0.012513	0.009969	0.013226	0.01727	0.011901	0.015962	0.012073	0.024198	0.009314	0.009206	0.009614	0.009748	0.002963	0.00749	0.011059	0.006759	0.026977
Anaplasma marginale Maries uid57629	0.022955	0.015916	0.017721	0.028289	0.025629	0.018801	0.013502	0.025319	0.011995	0.012136	0.013804	0.009462	0.011188	0.012323	0.019175	0.017092	0.000702	0.013815	0.015576	0.001407	0.008555	0.023953	0.014585	0.020732	0.009974	0.016343	0.012961	0.008397	0.000664	0.008189	0.010881	0.008464	0.012545	0.009956	0.013294	0.017256	0.011946	0.015998	0.012092	0.024117	0.009228	0.009105	0.009722	0.009775	0.003008	0.007434	0.01108	0.006732	0.026969
Anaplasma phagocytophilum Dog2 uid213225	0.026338	0.026192	0.013178	0.031557	0.031746	0.023918	0.011021	0.025359	0.013796	0.018534	0.00706	0.008609	0.014283	0.019854	0.012287	0.01363	0.001275	0.02171	0.011728	0.001504	0.019925	0.028801	0.011614	0.021584	0.012522	0.023878	0.007109	0.007467	0.000822	0.011863	0.006983	0.007524	0.013009	0.014383	0.007515	0.01428	0.014083	0.01872	0.008005	0.012777	0.007976	0.014994	0.00401	0.005682	0.003222	0.010102	0.005651	0.003832	0.03308
Anaplasma phagocytophilum HZ uid57951	0.025994	0.026087	0.012725	0.031317	0.032818	0.023936	0.011065	0.025641	0.013466	0.017994	0.006666	0.008302	0.014313	0.019217	0.01233	0.01378	0.001379	0.021454	0.011795	0.001546	0.019896	0.029134	0.011807	0.02236	0.012928	0.023862	0.007124	0.007632	0.000852	0.011699	0.007135	0.007479	0.013344	0.014606	0.007731	0.014379	0.013954	0.018799	0.008098	0.013069	0.008185	0.015108	0.004022	0.005802	0.003233	0.010347	0.005805	0.003918	0.033264
Anaplasma phagocytophilum HZ2 uid213224	0.026139	0.026077	0.013	0.031548	0.031667	0.023767	0.010932	0.025266	0.013714	0.018755	0.007007	0.008566	0.014388	0.019948	0.012243	0.013782	0.001269	0.021475	0.011634	0.001465	0.01984	0.028482	0.011478	0.021501	0.012643	0.023997	0.007064	0.007512	0.000799	0.011674	0.006936	0.007492	0.013122	0.014295	0.007446	0.014377	0.013992	0.018653	0.007988	0.012739	0.00805	0.015267	0.003964	0.005673	0.003202	0.010189	0.005579	0.003811	0.03367
Anaplasma phagocytophilum JM uid213223	0.026321	0.026084	0.01296	0.031572	0.03168	0.023703	0.010834	0.025087	0.013638	0.018805	0.007115	0.008595	0.014451	0.019928	0.012257	0.013827	0.001254	0.021498	0.011554	0.001482	0.019844	0.028421	0.011466	0.021306	0.012582	0.024084	0.007016	0.007426	0.00081	0.011667	0.006892	0.007417	0.013025	0.014194	0.007412	0.014394	0.01392	0.018635	0.007928	0.012734	0.008061	0.015411	0.003939	0.005647	0.003219	0.010176	0.005588	0.003803	0.033919
Anoxybacillus flavithermus WK1 uid59135	0.052783	0.018986	0.016898	0.012997	0.007621	0.046944	0.018796	0.028636	0.022236	0.004561	0.004465	0.023488	0.004358	0.006953	0.009079	0.001654	0.001993	0.024902	0.011476	0.000547	0.034179	0.034808	0.010187	0.018609	0.010083	0.008307	0.004476	0.010778	0.000841	0.005563	0.003189	0.010864	0.035761	0.019572	0.006375	0.007574	0.007507	0.019657	0.009978	0.004545	0.013576	0.006658	0.001543	0.014494	0.009282	0.015694	0.014351	0.004812	0.056433
Aquifex aeolicus VF5 uid57765	0.044961	0.0107	0.025176	0.048877	0.045994	0.017323	0.009747	0.018716	0.008657	0.009687	0.011346	0.012289	0.01905	0.007785	0.007851	0.025972	0.001603	0.007465	0.033755	0.000386	0.017542	0.028811	0.022473	0.008086	0.007052	0.008816	0.012831	0.00345	0.00117	0.003852	0.004052	0.009332	0.00725	0.002573	0.01286	0.013118	0.007712	0.026771	0.031029	0.014536	0.005575	0.010834	0.017189	0.007027	0.000553	0.001498	0.001238	0.000757	0.062536
Arcanobacterium haemolyticum DSM 20595 uid49489	0.014979	0.010673	0.019773	0.023452	0.003115	0.023301	0.031202	0.023085	0.010485	0.012087	0.021016	0.016848	0.001565	0.004383	0.007243	0.001651	0.001219	0.009361	0.014485	0.000503	0.005995	0.01238	0.022319	0.021044	0.008438	0.012166	0.013231	0.01531	0.00129	0.003063	0.004259	0.013949	0.013912	0.008732	0.013933	0.017548	0.006465	0.018786	0.022681	0.017671	0.018091	0.009056	0.004919	0.015079	0.005483	0.018352	0.023207	0.0099	0.045166
Archaeoglobus fulgidus DSM 4304 uid57717	0.024092	0.009945	0.022016	0.044362	0.022849	0.028303	0.020864	0.025256	0.00986	0.008023	0.011796	0.011751	0.022187	0.004565	0.018632	0.029735	0.001221	0.00838	0.027931	0.000556	0.005585	0.018213	0.027555	0.010792	0.009106	0.006343	0.009247	0.006989	0.001839	0.002504	0.009197	0.010357	0.002855	0.00423	0.010836	0.014944	0.00484	0.023557	0.024391	0.025567	0.008336	0.007608	0.011446	0.011058	0.001295	0.000846	0.002433	0.001109	0.028113
Archaeoglobus profundus DSM 5631 uid43493	0.031961	0.014913	0.020145	0.05001	0.038845	0.026143	0.017672	0.022074	0.012852	0.012152	0.005739	0.010531	0.030413	0.009764	0.011647	0.021797	0.001414	0.013313	0.024683	0.000578	0.016279	0.021503	0.023211	0.023711	0.008798	0.008312	0.005176	0.006344	0.0018	0.00621	0.006784	0.009866	0.006108	0.006531	0.008506	0.009574	0.010921	0.018792	0.014956	0.01259	0.012879	0.009503	0.006496	0.008118	0.00141	0.001675	0.00097	0.000609	0.042238
Archaeoglobus sulfaticallidus PM70 1 uid201033	0.034464	0.016917	0.02025	0.042401	0.038128	0.023912	0.024577	0.025522	0.015513	0.008977	0.009556	0.008427	0.025849	0.007766	0.014361	0.02343	0.001309	0.017806	0.019621	0.000749	0.008801	0.020013	0.02563	0.011393	0.012119	0.00942	0.00807	0.006623	0.00159	0.004763	0.006376	0.009744	0.003419	0.007909	0.007206	0.013643	0.006584	0.020151	0.01882	0.026476	0.013372	0.007384	0.005856	0.009449	0.001547	0.000976	0.000918	0.001151	0.034787
Archaeoglobus veneficus SNP6 uid65269	0.027337	0.010513	0.021581	0.042797	0.032122	0.023854	0.021105	0.024536	0.012176	0.008961	0.008768	0.013388	0.024011	0.007492	0.015884	0.023189	0.00132	0.010322	0.025245	0.000758	0.00602	0.017508	0.024833	0.007906	0.008217	0.007464	0.007317	0.007498	0.001615	0.004509	0.008173	0.009912	0.002849	0.005281	0.010905	0.014599	0.005235	0.021985	0.029764	0.022701	0.01066	0.007729	0.009475	0.010629	0.002211	0.002064	0.004288	0.001866	0.040673
archaeon Mx1201 uid196597	0.014688	0.006813	0.026725	0.043646	0.022845	0.003357	0.039895	0.035051	0.005494	0.003063	0.030511	0.012713	0.008894	0.003473	0.011088	0.026295	0.000474	0.012127	0.0234	9.7e-05	0.001189	0.002233	0.034991	0.006159	0.002721	0.00387	0.031018	0.011676	0.002814	0.004131	0.012711	0.008979	0.002328	0.006382	0.010027	0.019147	0.001722	0.008941	0.031881	0.029448	0.001669	0.005926	0.018234	0.012901	0.000292	0.006538	0.010488	0.002178	0.019447
Arcobacter butzleri 7h1h uid200766	0.088496	0.056901	0.009332	0.00672	0.037467	0.050443	0.009312	0.021344	0.026119	0.022976	0.000582	0.001574	0.024031	0.020195	0.003204	0.001044	0.002266	0.034823	0.004758	0.00045	0.057383	0.048623	0.005445	0.00854	0.021709	0.019067	0.000357	0.001192	0.000429	0.007624	0.001005	0.006989	0.026436	0.011176	0.003334	0.001641	0.009335	0.020662	0.000669	0.000709	0.015559	0.010421	0.000415	0.000347	0.00132	0.001124	5.4e-05	4.9e-05	0.057776
Arcobacter butzleri ED 1 uid158699	0.087734	0.057957	0.009318	0.006762	0.037365	0.050619	0.00911	0.021233	0.02642	0.023059	0.000593	0.001596	0.023993	0.020294	0.00318	0.00108	0.002223	0.03477	0.004686	0.000447	0.057532	0.047929	0.005575	0.00851	0.021765	0.019378	0.000368	0.001243	0.000405	0.007513	0.001002	0.006958	0.026491	0.011112	0.003171	0.001632	0.009383	0.02037	0.00066	0.000677	0.015362	0.010395	0.000426	0.00039	0.00131	0.001029	6.4e-05	5e-05	0.057688
Arcobacter butzleri RM4018 uid58557	0.088231	0.057436	0.009492	0.006709	0.037425	0.050188	0.009313	0.021513	0.026325	0.023072	0.000615	0.001583	0.023743	0.020339	0.003266	0.001047	0.002261	0.034717	0.004791	0.000441	0.057451	0.048701	0.005513	0.008518	0.021813	0.019218	0.000342	0.001198	0.000406	0.007462	0.000968	0.006854	0.026533	0.010946	0.003303	0.001602	0.009268	0.020709	0.000692	0.000722	0.015312	0.010397	0.000393	0.000351	0.001346	0.001042	7.6e-05	6.2e-05	0.057434
Arcobacter L uid158135	0.087915	0.060257	0.008027	0.006442	0.036072	0.053639	0.00891	0.021553	0.027988	0.021925	0.000965	0.001527	0.023236	0.019866	0.002185	0.001017	0.002224	0.035781	0.004133	0.000444	0.060195	0.048359	0.005383	0.008142	0.023866	0.019166	0.000597	0.001011	0.000442	0.007516	0.000858	0.006911	0.025631	0.011806	0.002529	0.001635	0.008492	0.0194	0.000731	0.000681	0.014409	0.010755	0.000619	0.000351	0.001302	0.00117	7.2e-05	7.9e-05	0.060265
Arcobacter nitrofigilis DSM 7299 uid49001	0.083467	0.053727	0.009953	0.010814	0.038264	0.047216	0.010203	0.022749	0.025403	0.022748	0.002712	0.001553	0.023116	0.020504	0.003041	0.001876	0.002225	0.034791	0.005581	0.000521	0.052458	0.045739	0.005681	0.009413	0.021782	0.019575	0.001394	0.000942	0.00041	0.007917	0.001032	0.007386	0.024911	0.012072	0.003462	0.001825	0.011508	0.021516	0.001257	0.000972	0.014188	0.011431	0.00164	0.000354	0.001497	0.001167	0.000116	0.000135	0.052374
Aromatoleum aromaticum EbN1 uid58231	0.007634	0.005621	0.019017	0.022908	0.001346	0.005632	0.038618	0.021996	0.002732	0.003829	0.019935	0.022191	0.001359	0.002744	0.016605	0.003186	0.000431	0.006516	0.015794	0.000406	0.000598	0.005698	0.030407	0.007712	0.002174	0.001574	0.009023	0.019844	0.002312	0.001733	0.009533	0.013744	0.005292	0.008025	0.0161	0.027999	0.001345	0.006322	0.036491	0.052775	0.002898	0.003675	0.012692	0.033537	0.004606	0.008336	0.046719	0.016437	0.027353
Arthrobacter arilaitensis Re117 uid53509	0.007696	0.008779	0.020002	0.027634	0.001509	0.012631	0.036574	0.02144	0.003476	0.00706	0.037389	0.008952	0.001189	0.003076	0.015016	0.002325	0.000988	0.005701	0.016147	0.001291	0.001732	0.005122	0.027941	0.018719	0.005214	0.004336	0.019254	0.015997	0.000877	0.000776	0.005913	0.014099	0.009164	0.007739	0.014086	0.028641	0.003808	0.009276	0.01697	0.052897	0.010541	0.006838	0.00941	0.020971	0.004804	0.010263	0.031817	0.009381	0.035916
Arthrobacter aurescens TC1 uid58109	0.007067	0.004751	0.021645	0.023113	0.00191	0.009464	0.033894	0.019668	0.006634	0.006555	0.029941	0.016784	0.001345	0.003623	0.015064	0.005542	0.000751	0.003985	0.016782	0.001075	0.00077	0.005475	0.027519	0.015201	0.005793	0.003326	0.022337	0.011833	0.001161	0.001138	0.005207	0.014735	0.008054	0.005087	0.015997	0.023538	0.001684	0.012133	0.028703	0.042491	0.004625	0.006892	0.020061	0.022353	0.004039	0.009241	0.025555	0.015721	0.026451
Arthrobacter chlorophenolicus A6 uid58969	0.004856	0.002834	0.022352	0.022315	0.000954	0.005904	0.034901	0.018607	0.004083	0.003763	0.035632	0.015431	0.000496	0.002139	0.015615	0.00504	0.000529	0.002511	0.018177	0.00097	0.000312	0.00387	0.028029	0.004736	0.003796	0.001835	0.024046	0.011138	0.001468	0.000573	0.00529	0.014094	0.002971	0.003446	0.016766	0.028481	0.000755	0.008341	0.028036	0.059818	0.002715	0.004081	0.022564	0.026267	0.001377	0.005312	0.02807	0.023154	0.02497
Arthrobacter FB24 uid58141	0.00581	0.003565	0.021153	0.022481	0.00138	0.006777	0.034887	0.019299	0.004615	0.004463	0.031849	0.01729	0.000908	0.002475	0.015674	0.005306	0.000564	0.003366	0.017428	0.001084	0.000436	0.004744	0.027806	0.005738	0.004213	0.001898	0.023245	0.011856	0.001311	0.000745	0.005559	0.014359	0.003417	0.004107	0.016393	0.02718	0.00137	0.009308	0.029967	0.054206	0.002559	0.004297	0.020249	0.028196	0.00229	0.00609	0.027789	0.0222	0.025764
Arthrobacter nitroguajacolicus Rue61a uid174511	0.007047	0.00468	0.021617	0.0229	0.001905	0.009461	0.034187	0.019993	0.006688	0.0066	0.029876	0.016753	0.001294	0.003544	0.015172	0.005441	0.000773	0.004023	0.016936	0.001068	0.000727	0.005453	0.027696	0.015084	0.005729	0.00327	0.022322	0.011763	0.001154	0.001092	0.005112	0.014703	0.008097	0.005026	0.015965	0.023379	0.001691	0.012092	0.028976	0.042379	0.004585	0.006796	0.020045	0.022102	0.004008	0.009133	0.025438	0.01568	0.02665
Arthrobacter phenanthrenivorans Sphe3 uid63629	0.005337	0.003384	0.021239	0.022466	0.001255	0.006642	0.034444	0.019024	0.004329	0.004297	0.032858	0.015313	0.000683	0.002428	0.015413	0.005977	0.000541	0.003174	0.017701	0.001028	0.000357	0.0048	0.027465	0.005364	0.00417	0.001984	0.023492	0.010371	0.001483	0.000685	0.005459	0.014322	0.003276	0.004383	0.01638	0.028785	0.000827	0.00986	0.027968	0.058318	0.003136	0.005045	0.021912	0.025339	0.00166	0.005679	0.027237	0.023658	0.024266
Arthrospira platensis NIES 39 uid197171	0.033571	0.029958	0.015646	0.012443	0.010851	0.039048	0.018897	0.019012	0.011368	0.019036	0.019967	0.006474	0.008175	0.014843	0.009715	0.006051	0.001917	0.022828	0.008717	0.000892	0.032186	0.028582	0.009345	0.020498	0.009477	0.014284	0.010453	0.006615	0.000794	0.0072	0.003418	0.015778	0.033815	0.012135	0.007247	0.018385	0.015133	0.008755	0.011956	0.016034	0.011118	0.01383	0.017272	0.008079	0.009031	0.00857	0.013731	0.009249	0.044136
Aster yellows witches broom phytoplasma AYWB uid58297	0.104716	0.049902	0.020899	0.006191	0.018913	0.058373	0.016119	0.017859	0.016056	0.028807	0.01172	0.001526	0.012146	0.011172	0.005264	0.001278	0.003064	0.030016	0.008408	0.000294	0.061783	0.050892	0.007654	0.016523	0.011092	0.019252	0.005655	0.00197	0.000507	0.007274	0.002931	0.005915	0.054025	0.013131	0.006502	0.001434	0.008057	0.016828	0.003841	0.001255	0.008195	0.01696	0.005471	0.001014	0.001756	0.006813	0.004089	0.000242	0.055528
Asticcacaulis excentricus CB 48 uid55641	0.012659	0.013362	0.016045	0.028068	0.00367	0.012618	0.032976	0.02276	0.005613	0.004255	0.027571	0.020108	0.001704	0.00369	0.013506	0.002244	0.001266	0.016009	0.009979	0.000579	0.002671	0.016656	0.021403	0.010889	0.005588	0.005376	0.0103	0.019237	0.001223	0.002419	0.005581	0.013722	0.008846	0.008023	0.011969	0.02546	0.004557	0.013086	0.017247	0.054167	0.004395	0.006007	0.01457	0.025264	0.003369	0.013406	0.03474	0.008697	0.030944
Atopobium parvulum DSM 20469 uid59195	0.021334	0.019319	0.018993	0.029517	0.004731	0.042086	0.014777	0.023868	0.01291	0.02078	0.016753	0.008839	0.006839	0.007638	0.00878	0.003341	0.001789	0.017055	0.012369	0.000964	0.008122	0.027222	0.012226	0.012452	0.012176	0.023494	0.008778	0.006151	0.000187	0.006058	0.006674	0.009759	0.012326	0.010228	0.009421	0.023132	0.005999	0.040115	0.013044	0.0141	0.015203	0.01672	0.003826	0.003335	0.003765	0.018273	0.014108	0.00073	0.02417
Azoarcus BH72 uid61603	0.002649	0.003848	0.020214	0.024691	0.000533	0.003476	0.038556	0.021399	0.001107	0.001293	0.030938	0.013889	0.000431	0.001657	0.018136	0.001227	0.000446	0.00498	0.017611	0.000344	0.000178	0.004153	0.031206	0.005926	0.000779	0.000749	0.010983	0.015113	0.002203	0.001122	0.008559	0.013822	0.00356	0.00566	0.016986	0.029593	0.000824	0.004656	0.030091	0.068542	0.001501	0.002151	0.017056	0.032507	0.001476	0.006578	0.054302	0.013591	0.026231
Azoarcus KH32C uid193704	0.004369	0.006194	0.020049	0.026739	0.000827	0.005366	0.041162	0.023286	0.002235	0.002516	0.023448	0.021836	0.000862	0.002527	0.016625	0.00206	0.000511	0.006161	0.016299	0.000364	0.000362	0.00446	0.031727	0.008534	0.001536	0.00125	0.010432	0.019956	0.002044	0.001391	0.008716	0.013374	0.00581	0.007332	0.015194	0.027517	0.001749	0.006095	0.038812	0.05003	0.00214	0.002903	0.015205	0.030241	0.003393	0.008782	0.045819	0.013671	0.026853
Azorhizobium caulinodans ORS 571 uid58905	0.002411	0.007678	0.015757	0.026819	0.00068	0.004456	0.041361	0.02269	0.001986	0.001343	0.031505	0.019926	0.000618	0.001259	0.015455	0.001747	0.000176	0.012814	0.008105	0.000273	0.00025	0.003711	0.032412	0.004026	0.001295	0.001702	0.019184	0.013796	0.002481	0.000777	0.007332	0.012426	0.002322	0.008484	0.011	0.027382	0.000697	0.007758	0.04239	0.049308	0.001867	0.002855	0.022474	0.029276	0.001776	0.00568	0.044394	0.017955	0.015401
Azospirillum B510 uid46085	0.003298	0.004903	0.017769	0.026289	0.000587	0.002572	0.040107	0.023178	0.001447	0.001069	0.035677	0.015302	0.000679	0.001081	0.01582	0.002665	0.000448	0.009567	0.009665	0.000352	0.000223	0.00216	0.029883	0.007013	0.001045	0.000907	0.013931	0.016531	0.002234	0.001016	0.007462	0.013111	0.003614	0.010326	0.009627	0.026138	0.000645	0.004838	0.017598	0.074089	0.001999	0.001829	0.01721	0.035507	0.002051	0.006723	0.045712	0.023059	0.01441
Azospirillum brasilense Sp245 uid162161	0.002671	0.002479	0.02099	0.026888	0.000559	0.002794	0.038852	0.023398	0.00122	0.001163	0.03292	0.017379	0.000543	0.0009	0.015036	0.001667	0.000656	0.005086	0.014477	0.000385	0.000234	0.002249	0.030896	0.005347	0.000943	0.000912	0.015408	0.014867	0.002537	0.000737	0.007855	0.012985	0.003098	0.006774	0.014359	0.027243	0.000559	0.005376	0.020371	0.071676	0.001937	0.002106	0.018508	0.035032	0.002356	0.005677	0.047476	0.021511	0.012875
Azospirillum lipoferum 4B uid82343	0.002629	0.00431	0.018888	0.02753	0.000623	0.002792	0.040277	0.02383	0.001271	0.001293	0.035152	0.015331	0.000555	0.001106	0.015847	0.001973	0.000542	0.008784	0.01069	0.000384	0.00021	0.001986	0.030516	0.005762	0.000855	0.001049	0.014547	0.016491	0.002383	0.000838	0.007611	0.012575	0.002711	0.008966	0.010855	0.027632	0.00052	0.004878	0.015382	0.07765	0.001515	0.001894	0.017277	0.035827	0.001672	0.00616	0.047402	0.021093	0.016736
Azotobacter vinelandii CA uid198829	0.004879	0.004967	0.020241	0.023142	0.001698	0.004364	0.03777	0.019994	0.001495	0.002375	0.030585	0.008841	0.001085	0.003316	0.022173	0.003605	0.000383	0.006655	0.01765	0.000447	0.000579	0.003658	0.03168	0.008989	0.000899	0.001191	0.01304	0.012439	0.002457	0.001452	0.008988	0.014407	0.006026	0.007912	0.015256	0.032592	0.00149	0.003414	0.026132	0.081374	0.002422	0.002517	0.015989	0.031116	0.003039	0.008343	0.045144	0.018275	0.02317
Azotobacter vinelandii CA6 uid198830	0.0049	0.004995	0.020272	0.023185	0.001708	0.00438	0.037823	0.02001	0.001494	0.002378	0.030617	0.00886	0.001091	0.00333	0.022192	0.00361	0.000382	0.006688	0.017679	0.000449	0.000582	0.003669	0.0317	0.009003	0.000899	0.001194	0.013062	0.012457	0.002456	0.001457	0.008966	0.014387	0.006038	0.007932	0.015239	0.0326	0.001495	0.003428	0.026063	0.081226	0.002424	0.002511	0.015983	0.031035	0.003033	0.008352	0.045098	0.018247	0.023215
Azotobacter vinelandii DJ uid57597	0.004879	0.004966	0.020242	0.023148	0.001698	0.004363	0.037778	0.019998	0.001495	0.002375	0.030586	0.008843	0.001085	0.003318	0.022182	0.003607	0.000383	0.006656	0.017641	0.000447	0.00058	0.003659	0.031669	0.008987	0.000899	0.001193	0.013039	0.012441	0.002456	0.001456	0.008986	0.014401	0.006025	0.007902	0.015249	0.032598	0.001496	0.00342	0.026134	0.081361	0.002422	0.002523	0.015981	0.031111	0.003034	0.008349	0.045147	0.018283	0.023166
Bacillus 1NLA3E uid81841	0.05095	0.033106	0.013747	0.021589	0.015283	0.04705	0.020003	0.026232	0.019651	0.014185	0.010353	0.009156	0.010525	0.012465	0.007205	0.004558	0.002197	0.0252	0.008776	0.000632	0.035522	0.035188	0.011871	0.016225	0.015584	0.012616	0.007164	0.005982	0.000591	0.005573	0.002556	0.009948	0.026319	0.014869	0.005103	0.010491	0.012059	0.021272	0.006194	0.007048	0.015384	0.011021	0.00327	0.00629	0.006427	0.008848	0.004555	0.004521	0.05123
Bacillus amyloliquefaciens DSM 7 uid53535	0.050252	0.019931	0.017517	0.019273	0.008401	0.032844	0.029809	0.026664	0.017132	0.006747	0.010693	0.020476	0.010158	0.005744	0.014553	0.004034	0.002072	0.020442	0.013296	0.00042	0.016675	0.027871	0.015936	0.012737	0.014085	0.010371	0.009876	0.007077	0.000879	0.0032	0.004677	0.009959	0.015815	0.014348	0.007993	0.021063	0.002349	0.022107	0.013451	0.027979	0.002974	0.008268	0.004532	0.021692	0.002851	0.00714	0.009965	0.009814	0.050505
Bacillus amyloliquefaciens FZB42 uid58271	0.049826	0.019186	0.017328	0.018241	0.008313	0.032354	0.030244	0.02686	0.016427	0.006085	0.010476	0.021202	0.010125	0.005561	0.014903	0.003937	0.001952	0.020412	0.013199	0.000415	0.016748	0.028162	0.016159	0.012841	0.01359	0.010454	0.010223	0.007147	0.000841	0.003322	0.004862	0.0099	0.01566	0.014952	0.008219	0.02121	0.00193	0.021906	0.013827	0.029097	0.002528	0.008115	0.004873	0.022503	0.002592	0.006999	0.010225	0.010191	0.050631
Bacillus amyloliquefaciens IT 45 uid181617	0.050231	0.019146	0.017438	0.018454	0.00817	0.032136	0.030335	0.026782	0.016288	0.006025	0.010506	0.021208	0.010095	0.00546	0.014866	0.003984	0.001999	0.020192	0.013247	0.000426	0.016328	0.027917	0.016229	0.012727	0.013646	0.010412	0.010306	0.007157	0.000897	0.003253	0.004831	0.009907	0.015407	0.014762	0.00819	0.021382	0.001766	0.021922	0.01384	0.029254	0.002379	0.008125	0.004951	0.022835	0.002569	0.007067	0.010202	0.010417	0.050756
Bacillus amyloliquefaciens LL3 uid158133	0.051282	0.020522	0.017536	0.019313	0.008592	0.033223	0.029437	0.026742	0.017331	0.006841	0.010562	0.019906	0.010403	0.005832	0.014524	0.004094	0.002203	0.020786	0.013249	0.000454	0.016952	0.028594	0.016029	0.012823	0.014336	0.010478	0.009877	0.006791	0.000973	0.003293	0.004675	0.009907	0.01594	0.014548	0.007895	0.020927	0.002324	0.022194	0.013334	0.027768	0.002984	0.008351	0.004583	0.021373	0.002747	0.006903	0.009668	0.009607	0.050735
Bacillus amyloliquefaciens plantarum AS43 3 uid183682	0.049983	0.019171	0.017471	0.018415	0.008158	0.03217	0.030249	0.026723	0.016324	0.006249	0.010395	0.021172	0.010058	0.005485	0.014952	0.003947	0.001998	0.020295	0.013222	0.000423	0.016406	0.028023	0.016169	0.01282	0.01371	0.010511	0.010234	0.007142	0.000904	0.003295	0.00486	0.009929	0.015569	0.014802	0.008119	0.021295	0.001915	0.021835	0.013761	0.02905	0.002594	0.008261	0.004994	0.022701	0.0026	0.006996	0.01015	0.010225	0.050543
Bacillus amyloliquefaciens plantarum CAU B946 uid84215	0.050247	0.019281	0.01758	0.018615	0.008145	0.032049	0.030159	0.026764	0.016449	0.006187	0.010617	0.021224	0.01007	0.005511	0.014813	0.003975	0.001969	0.020208	0.013243	0.000407	0.016393	0.027788	0.016115	0.01274	0.013723	0.01042	0.010262	0.007104	0.000866	0.003263	0.00478	0.009879	0.015497	0.014669	0.008145	0.021187	0.001845	0.02183	0.013751	0.029004	0.002545	0.008218	0.004942	0.022722	0.002582	0.007061	0.010057	0.010312	0.050642
Bacillus amyloliquefaciens plantarum UCMB5033 uid215237	0.050371	0.019787	0.01757	0.018752	0.008334	0.032426	0.029962	0.026748	0.016568	0.006315	0.010421	0.020848	0.010287	0.005697	0.014779	0.004022	0.001992	0.020609	0.013313	0.000411	0.016847	0.028142	0.016147	0.012772	0.013708	0.010528	0.010194	0.007062	0.000865	0.003245	0.004764	0.009967	0.015852	0.014703	0.008125	0.02102	0.002069	0.021808	0.013615	0.028609	0.002687	0.008124	0.004851	0.022106	0.002651	0.006957	0.009985	0.009971	0.050984
Bacillus amyloliquefaciens plantarum UCMB5036 uid190705	0.04978	0.018961	0.017437	0.018262	0.008075	0.032132	0.030499	0.026838	0.016269	0.005904	0.010505	0.021384	0.009998	0.005406	0.014987	0.003955	0.001931	0.020373	0.013267	0.000402	0.016372	0.028012	0.016167	0.012722	0.013586	0.010344	0.010315	0.007228	0.000837	0.003199	0.004813	0.009932	0.015493	0.014826	0.008222	0.021431	0.001829	0.021951	0.014002	0.029383	0.002331	0.008089	0.004893	0.022768	0.00256	0.006992	0.010266	0.010226	0.0508
Bacillus amyloliquefaciens plantarum UCMB5113 uid215236	0.049676	0.018876	0.017343	0.01817	0.007946	0.032101	0.030526	0.026905	0.016227	0.005937	0.010534	0.021428	0.010026	0.005418	0.01493	0.003947	0.001951	0.020254	0.013233	0.0004	0.016281	0.02797	0.016265	0.012767	0.013583	0.01034	0.01028	0.0072	0.000847	0.003223	0.004824	0.009967	0.015513	0.014794	0.008213	0.021432	0.001804	0.021965	0.013991	0.029439	0.002407	0.008093	0.004897	0.02281	0.002569	0.00704	0.010286	0.010297	0.050762
Bacillus amyloliquefaciens plantarum YAU B9601 Y2 uid159001	0.050762	0.020373	0.01772	0.019342	0.008797	0.032579	0.029536	0.026696	0.016834	0.006654	0.010325	0.020395	0.010267	0.005947	0.014626	0.004055	0.001965	0.020951	0.013209	0.000408	0.017324	0.028074	0.016005	0.01293	0.013857	0.010682	0.010097	0.007038	0.000849	0.003349	0.004697	0.00993	0.016163	0.014691	0.008035	0.020773	0.00228	0.021752	0.013337	0.028023	0.002883	0.008174	0.004741	0.021509	0.002711	0.006983	0.009745	0.009825	0.051102
Bacillus amyloliquefaciens TA208 uid158701	0.050942	0.020403	0.017574	0.019274	0.00854	0.033223	0.029659	0.026608	0.017076	0.006805	0.01034	0.02008	0.010394	0.005841	0.014555	0.004003	0.002185	0.020771	0.013338	0.000454	0.016939	0.028295	0.016033	0.012767	0.014208	0.010488	0.009797	0.006859	0.00091	0.003292	0.004694	0.009921	0.01581	0.014514	0.007976	0.020889	0.002326	0.022236	0.013463	0.027833	0.002818	0.008368	0.004519	0.021475	0.002719	0.007059	0.009772	0.009622	0.050722
Bacillus amyloliquefaciens XH7 uid158881	0.051006	0.020381	0.017539	0.019188	0.008509	0.033234	0.029566	0.026688	0.017085	0.006747	0.010419	0.020053	0.010411	0.005815	0.014587	0.004024	0.002195	0.020861	0.01332	0.000463	0.016886	0.02856	0.016125	0.012796	0.014264	0.010479	0.009848	0.006866	0.000976	0.003306	0.0047	0.009856	0.015792	0.014557	0.00796	0.020941	0.002274	0.022245	0.013475	0.027868	0.002802	0.008385	0.004578	0.021609	0.002706	0.006936	0.009743	0.009645	0.050729
Bacillus amyloliquefaciens Y2 uid165195	0.051028	0.020356	0.01772	0.019291	0.008857	0.032602	0.029648	0.026943	0.0167	0.006418	0.010327	0.020397	0.010407	0.005804	0.01465	0.004131	0.002089	0.02101	0.013215	0.000444	0.017166	0.028636	0.016245	0.012978	0.013859	0.010577	0.010164	0.00702	0.001002	0.003405	0.004753	0.009932	0.015924	0.014777	0.008007	0.020723	0.002153	0.021755	0.01337	0.028124	0.002725	0.008185	0.004754	0.02154	0.002662	0.006858	0.009799	0.009945	0.050977
Bacillus anthracis A0248 uid59385	0.055424	0.032357	0.013117	0.017894	0.0164	0.050525	0.013364	0.028022	0.027707	0.012226	0.00245	0.013506	0.009256	0.01425	0.005733	0.002328	0.002556	0.027633	0.009225	0.000581	0.049593	0.032194	0.014295	0.009326	0.014552	0.015347	0.003128	0.004552	0.000555	0.006196	0.002121	0.010177	0.029996	0.01632	0.004813	0.006634	0.01052	0.018115	0.004188	0.00321	0.016486	0.009033	0.001012	0.007546	0.005297	0.014195	0.004836	0.001301	0.056945
Bacillus anthracis A2012 uid54101	0.067561	0.044167	0.013777	0.024692	0.02575	0.043278	0.011973	0.024885	0.024644	0.013681	0.00553	0.007958	0.014426	0.016421	0.00577	0.004568	0.002933	0.035031	0.01005	0.00089	0.043037	0.035055	0.0113	0.012334	0.014258	0.016421	0.004881	0.003751	0.00089	0.007333	0.002645	0.010916	0.031833	0.017744	0.005265	0.010892	0.014762	0.015171	0.003919	0.005145	0.013729	0.009521	0.002549	0.004328	0.006972	0.011084	0.002981	0.001899	0.054289
Bacillus anthracis Ames Ancestor uid58083	0.055514	0.032417	0.013055	0.017882	0.016523	0.050539	0.013318	0.028022	0.027638	0.012165	0.002464	0.013476	0.009274	0.014261	0.005715	0.002365	0.002536	0.027691	0.009231	0.000578	0.049629	0.032385	0.014282	0.009377	0.014576	0.015347	0.00314	0.00456	0.000548	0.006256	0.002132	0.010204	0.030006	0.016301	0.004817	0.006684	0.010555	0.018141	0.004198	0.003245	0.016378	0.008991	0.001024	0.007524	0.005318	0.014147	0.004825	0.001317	0.056896
Bacillus anthracis Ames uid57909	0.055595	0.03261	0.013067	0.017901	0.01666	0.050436	0.013291	0.027935	0.027658	0.012263	0.002509	0.013484	0.009304	0.014308	0.005711	0.002379	0.002533	0.02777	0.009218	0.000585	0.049578	0.032399	0.014273	0.009415	0.014581	0.015343	0.003154	0.00456	0.000555	0.006232	0.002125	0.010241	0.030056	0.016292	0.004797	0.006715	0.010554	0.018069	0.004179	0.003247	0.016387	0.009036	0.001018	0.007504	0.005337	0.014093	0.004785	0.001321	0.056883
Bacillus anthracis CDC 684 uid59303	0.055932	0.032828	0.013082	0.017979	0.016791	0.05046	0.013227	0.027934	0.027722	0.012306	0.002512	0.013524	0.009341	0.014397	0.005739	0.002379	0.002588	0.02777	0.009186	0.000612	0.049582	0.032497	0.014175	0.009507	0.014553	0.015316	0.003168	0.004566	0.000604	0.006164	0.002107	0.010263	0.030085	0.016301	0.004757	0.00669	0.01053	0.017993	0.004167	0.003252	0.016344	0.009056	0.001044	0.007488	0.005327	0.013861	0.004742	0.001314	0.056821
Bacillus anthracis H9401 uid162021	0.055958	0.03282	0.013043	0.017961	0.016635	0.050404	0.013154	0.027991	0.027748	0.012232	0.002472	0.013549	0.009328	0.01436	0.005721	0.002403	0.002578	0.027734	0.00917	0.000605	0.04953	0.032328	0.0141	0.009413	0.014526	0.015255	0.003129	0.004539	0.000581	0.006119	0.002078	0.010259	0.03007	0.016333	0.004731	0.006661	0.010416	0.01792	0.004114	0.003198	0.01636	0.00902	0.001027	0.007512	0.005305	0.013881	0.004724	0.001297	0.057129
Bacillus anthracis Sterne uid58091	0.055616	0.032744	0.013103	0.017924	0.016775	0.050416	0.013235	0.028012	0.027698	0.012327	0.002535	0.013514	0.009321	0.014359	0.005722	0.002411	0.002467	0.027807	0.009228	0.00057	0.049499	0.032433	0.014222	0.009533	0.014567	0.015328	0.00318	0.00458	0.000546	0.006215	0.002126	0.010243	0.029997	0.016324	0.004808	0.006706	0.010549	0.018054	0.004183	0.003249	0.016398	0.009046	0.001045	0.007496	0.005368	0.013972	0.004728	0.001327	0.056813
Bacillus atrophaeus 1942 uid59887	0.049691	0.023255	0.016478	0.020926	0.01088	0.036349	0.025983	0.026706	0.021045	0.008616	0.0101	0.014508	0.010808	0.006845	0.013616	0.00407	0.002209	0.022903	0.011673	0.00051	0.020566	0.030836	0.013754	0.015752	0.014886	0.012439	0.008725	0.006328	0.000766	0.003744	0.004135	0.010031	0.020678	0.015451	0.007101	0.017778	0.004519	0.023653	0.010395	0.02213	0.005499	0.010372	0.00387	0.016709	0.00366	0.007258	0.007946	0.006671	0.050669
Bacillus cellulosilyticus DSM 2522 uid43329	0.04613	0.033192	0.014961	0.021141	0.022876	0.043636	0.014802	0.026426	0.023279	0.014489	0.004128	0.012265	0.014302	0.014807	0.00644	0.004722	0.002245	0.026792	0.010009	0.000644	0.04344	0.035687	0.010937	0.010874	0.014651	0.014802	0.00498	0.005053	0.000524	0.005196	0.001795	0.010709	0.026831	0.015969	0.006354	0.008267	0.013931	0.017229	0.006391	0.003738	0.015289	0.0119	0.001531	0.004933	0.006122	0.009784	0.003399	0.001923	0.056314
Bacillus cereus 03BB102 uid59299	0.056092	0.033125	0.013015	0.017974	0.017025	0.050591	0.013131	0.027779	0.027641	0.012388	0.002564	0.013546	0.009386	0.014309	0.005731	0.00242	0.00252	0.027735	0.009146	0.000583	0.049581	0.032559	0.014096	0.00942	0.014524	0.01534	0.0031	0.004585	0.00056	0.006216	0.002071	0.010111	0.030071	0.016379	0.00473	0.006697	0.010503	0.017856	0.004184	0.003188	0.016343	0.009135	0.001034	0.007565	0.005441	0.013725	0.004746	0.001334	0.056731
Bacillus cereus AH187 uid58753	0.05603	0.032709	0.013234	0.018101	0.016632	0.050164	0.013234	0.027671	0.02774	0.012408	0.00261	0.013616	0.009366	0.014257	0.005731	0.002414	0.002515	0.027705	0.009324	0.000595	0.049294	0.032368	0.014142	0.00953	0.014427	0.015358	0.003243	0.004557	0.000565	0.006092	0.00211	0.010188	0.03044	0.016315	0.004751	0.006692	0.010458	0.018023	0.004297	0.003281	0.016337	0.009102	0.001117	0.00758	0.00548	0.013886	0.004641	0.001384	0.056687
Bacillus cereus AH820 uid58751	0.056015	0.032927	0.013126	0.018228	0.017046	0.050075	0.013221	0.027713	0.027515	0.012362	0.002645	0.013517	0.009598	0.014314	0.00587	0.002524	0.002807	0.027984	0.00928	0.000804	0.049327	0.032619	0.014104	0.009558	0.014413	0.015291	0.003223	0.004584	0.00079	0.006257	0.002255	0.010261	0.029967	0.016375	0.004741	0.006867	0.010471	0.017875	0.004203	0.003299	0.016293	0.009108	0.00103	0.007434	0.005496	0.013728	0.004747	0.001411	0.056633
Bacillus cereus ATCC 10987 uid57673	0.055929	0.032976	0.013094	0.018512	0.017137	0.04973	0.013121	0.027658	0.02705	0.012162	0.002751	0.013383	0.009861	0.014254	0.005895	0.002819	0.003017	0.028019	0.009575	0.000893	0.048712	0.032868	0.014279	0.01	0.014476	0.015134	0.003375	0.004641	0.001076	0.006576	0.002465	0.010305	0.029871	0.016413	0.004797	0.006993	0.010491	0.017889	0.004406	0.003446	0.015991	0.009129	0.0012	0.007386	0.005578	0.013802	0.004751	0.001558	0.05612
Bacillus cereus ATCC 14579 uid57975	0.056008	0.033857	0.012964	0.018232	0.01738	0.050232	0.012832	0.027233	0.027674	0.01292	0.002716	0.012866	0.009536	0.014465	0.005771	0.002474	0.002436	0.027937	0.009357	0.000579	0.049058	0.032572	0.013743	0.009846	0.014788	0.015371	0.003079	0.00458	0.000577	0.006231	0.002068	0.010144	0.03016	0.016176	0.004673	0.006973	0.010554	0.018121	0.004013	0.003187	0.016552	0.009359	0.001158	0.007096	0.005317	0.013732	0.004478	0.001312	0.056683
Bacillus cereus B4264 uid58757	0.056299	0.033911	0.01303	0.018271	0.01718	0.050163	0.012795	0.027223	0.027814	0.012851	0.002592	0.012842	0.009528	0.014549	0.005655	0.002386	0.002451	0.027965	0.009321	0.00057	0.048834	0.032389	0.013772	0.00949	0.014919	0.015489	0.003015	0.004541	0.000546	0.006068	0.002011	0.010236	0.030331	0.016156	0.00461	0.006925	0.010571	0.018074	0.00399	0.003182	0.016573	0.009286	0.001096	0.007173	0.005334	0.01367	0.004477	0.00127	0.056741
Bacillus cereus biovar anthracis CI uid50615	0.056036	0.032947	0.012998	0.017955	0.016936	0.050739	0.013176	0.027877	0.027674	0.012152	0.002568	0.01352	0.009315	0.014311	0.005649	0.002387	0.002488	0.027947	0.009157	0.000555	0.049527	0.032648	0.014242	0.009464	0.014493	0.01543	0.003227	0.004574	0.00054	0.006228	0.002071	0.010137	0.029979	0.016406	0.004777	0.006725	0.010508	0.018109	0.00422	0.003213	0.016341	0.009094	0.001045	0.007582	0.005393	0.01394	0.004795	0.001386	0.056555
Bacillus cereus E33L uid58103	0.055873	0.033136	0.013031	0.01796	0.01705	0.050557	0.013071	0.027725	0.027665	0.012483	0.002587	0.013388	0.009323	0.014334	0.005664	0.002426	0.002427	0.02783	0.009174	0.000516	0.049709	0.032757	0.014095	0.009477	0.014588	0.015509	0.00322	0.004642	0.000514	0.006184	0.002066	0.010141	0.029938	0.016482	0.004677	0.006779	0.010664	0.018036	0.004211	0.00323	0.016371	0.009213	0.001093	0.007388	0.005367	0.013739	0.004649	0.001342	0.057005
Bacillus cereus F837 76 uid83611	0.05612	0.033128	0.013007	0.017836	0.017085	0.050701	0.013125	0.027597	0.027594	0.012416	0.002597	0.013411	0.009302	0.014364	0.005696	0.002386	0.002516	0.027815	0.0091	0.000595	0.049661	0.032696	0.014083	0.009442	0.014584	0.015433	0.003159	0.004552	0.000549	0.006229	0.002069	0.010109	0.030056	0.01639	0.004761	0.006689	0.010525	0.017918	0.004208	0.003212	0.01641	0.009119	0.001047	0.007485	0.005332	0.013722	0.004683	0.001324	0.056707
Bacillus cereus FRI 35 uid173403	0.055861	0.032453	0.013046	0.017837	0.016599	0.050593	0.013181	0.027786	0.027586	0.012064	0.00253	0.01359	0.0091	0.014142	0.005651	0.002322	0.002505	0.027591	0.009311	0.000562	0.049745	0.032539	0.014316	0.009346	0.014419	0.015234	0.003234	0.004596	0.000551	0.006141	0.002168	0.010123	0.030296	0.016519	0.004752	0.006729	0.010464	0.018053	0.004346	0.003185	0.016413	0.009167	0.001078	0.007603	0.005321	0.014062	0.004747	0.001387	0.056547
Bacillus cereus G9842 uid58759	0.056083	0.033868	0.012806	0.018266	0.017436	0.050281	0.012759	0.027421	0.02768	0.012747	0.002642	0.012718	0.009427	0.014604	0.005675	0.002521	0.002499	0.027861	0.009209	0.000584	0.049073	0.032562	0.013624	0.009806	0.014817	0.015394	0.00307	0.00462	0.000568	0.006216	0.002053	0.010174	0.030577	0.01618	0.004602	0.006965	0.010644	0.018075	0.004025	0.003268	0.016487	0.009231	0.001143	0.007141	0.005375	0.013689	0.004489	0.001323	0.056864
Bacillus cereus NC7401 uid82815	0.05573	0.032622	0.013254	0.01809	0.016732	0.050142	0.013284	0.027728	0.027669	0.012383	0.002585	0.013637	0.009343	0.01425	0.005733	0.002462	0.002529	0.027739	0.009415	0.000594	0.049288	0.032512	0.01426	0.009585	0.014457	0.015323	0.00329	0.004593	0.000575	0.006216	0.002148	0.010196	0.030321	0.016331	0.004799	0.006703	0.01043	0.018118	0.004367	0.003241	0.016389	0.00908	0.00115	0.00761	0.005466	0.013915	0.004662	0.001397	0.0564
Bacillus cereus Q1 uid58529	0.055753	0.032758	0.013165	0.018043	0.016763	0.050257	0.013174	0.027538	0.027556	0.012425	0.002646	0.013711	0.009249	0.014237	0.005672	0.002417	0.002456	0.027835	0.00928	0.000574	0.049468	0.032482	0.014121	0.009493	0.0145	0.015375	0.003202	0.004596	0.000537	0.006064	0.00209	0.010112	0.030373	0.01632	0.004771	0.006771	0.010443	0.017952	0.004288	0.003237	0.016436	0.009233	0.001087	0.007577	0.00542	0.013866	0.004671	0.001369	0.056717
Bacillus clausii KSM K16 uid58237	0.041351	0.020418	0.01675	0.016157	0.00758	0.039982	0.019056	0.026102	0.020399	0.008085	0.007685	0.018843	0.00463	0.007057	0.01329	0.003832	0.001926	0.020924	0.012282	0.000639	0.022079	0.034096	0.010284	0.024901	0.010375	0.009778	0.006973	0.009019	0.000761	0.00365	0.004083	0.010945	0.028639	0.015498	0.007057	0.011342	0.009382	0.022727	0.010715	0.010778	0.013417	0.011522	0.003402	0.01003	0.005527	0.010258	0.011789	0.00831	0.052544
Bacillus coagulans 2 6 uid68053	0.055428	0.020156	0.017436	0.016349	0.005562	0.034579	0.029201	0.027259	0.015399	0.00466	0.01265	0.018724	0.005459	0.004536	0.013423	0.005873	0.002096	0.019922	0.013592	0.000473	0.013894	0.030519	0.014294	0.019056	0.007376	0.006221	0.012555	0.00974	0.001062	0.002617	0.00563	0.009847	0.015049	0.014719	0.007064	0.020374	0.002245	0.02105	0.014272	0.026136	0.004295	0.005499	0.003962	0.025592	0.001724	0.00639	0.014069	0.014403	0.05771
Bacillus coagulans 36D1 uid54335	0.054815	0.020865	0.017312	0.016333	0.006308	0.036014	0.028372	0.027139	0.015975	0.005203	0.01249	0.018399	0.005878	0.005353	0.012909	0.005636	0.001961	0.020566	0.013432	0.000444	0.01524	0.031227	0.013991	0.019695	0.00798	0.006827	0.012126	0.009599	0.001013	0.002929	0.005331	0.010248	0.015931	0.014816	0.006985	0.019504	0.003085	0.021143	0.014021	0.024433	0.005	0.005835	0.003869	0.024013	0.002169	0.006712	0.012642	0.013517	0.056844
Bacillus cytotoxicus NVH 391 98 uid58317	0.055873	0.032394	0.010976	0.018519	0.014899	0.052828	0.013077	0.028361	0.030301	0.010205	0.003282	0.010877	0.008569	0.012538	0.005944	0.002309	0.002385	0.029429	0.007611	0.000579	0.045969	0.034638	0.01129	0.011429	0.012941	0.015313	0.004086	0.004762	0.000578	0.006204	0.002206	0.009797	0.031866	0.018413	0.004021	0.00774	0.009783	0.018917	0.004495	0.004043	0.016775	0.008931	0.001486	0.007077	0.00653	0.013843	0.006519	0.001999	0.057681
Bacillus halodurans C 125 uid57791	0.037137	0.020083	0.016038	0.021314	0.006722	0.038842	0.023524	0.026789	0.018061	0.007154	0.009617	0.020499	0.006142	0.008549	0.009525	0.003482	0.002022	0.022222	0.01149	0.000639	0.027344	0.031975	0.012426	0.017342	0.011235	0.009764	0.00795	0.008921	0.000735	0.004385	0.002941	0.011342	0.028232	0.016311	0.007764	0.012788	0.011443	0.021874	0.013759	0.008082	0.01309	0.010749	0.003071	0.011151	0.010758	0.011759	0.008627	0.007467	0.049529
Bacillus JS uid162189	0.04886	0.021734	0.016915	0.0208	0.009296	0.036602	0.027347	0.027416	0.02203	0.00821	0.008778	0.014922	0.010511	0.006351	0.014247	0.003887	0.00216	0.022463	0.011913	0.000488	0.018659	0.030946	0.014332	0.015496	0.014624	0.012609	0.008152	0.006486	0.000841	0.003513	0.004367	0.010171	0.019529	0.015308	0.007492	0.018963	0.00473	0.023251	0.010911	0.023849	0.006911	0.010393	0.003259	0.016189	0.003925	0.007493	0.008562	0.006489	0.048713
Bacillus licheniformis 9945A uid207072	0.04914	0.019105	0.018948	0.020774	0.007358	0.029641	0.034484	0.026835	0.017686	0.005816	0.009906	0.019112	0.009811	0.004261	0.015439	0.006208	0.001931	0.020885	0.01326	0.000485	0.014515	0.029849	0.015918	0.017903	0.01235	0.009079	0.009156	0.0099	0.000906	0.002769	0.004993	0.010274	0.016936	0.013789	0.008436	0.018888	0.003068	0.022311	0.01492	0.025363	0.004263	0.009318	0.004541	0.019509	0.003217	0.005245	0.010831	0.008418	0.052062
Bacillus licheniformis ATCC 14580 uid58097	0.049108	0.018689	0.019201	0.021659	0.007122	0.029336	0.034867	0.026519	0.01705	0.005771	0.00979	0.019449	0.00955	0.003748	0.015905	0.006377	0.001988	0.020313	0.013537	0.000554	0.013879	0.02929	0.015985	0.017621	0.012123	0.008828	0.009287	0.010224	0.00091	0.002558	0.0051	0.010273	0.016581	0.013349	0.008427	0.019211	0.003064	0.0224	0.014896	0.025701	0.004142	0.009233	0.004478	0.019464	0.003179	0.005046	0.011205	0.008462	0.051888
Bacillus licheniformis DSM 13 ATCC 14580 uid58199	0.0491	0.01875	0.019174	0.021672	0.007187	0.029372	0.034824	0.026683	0.017078	0.005819	0.009774	0.019454	0.009568	0.003794	0.015877	0.006378	0.001959	0.020274	0.013499	0.000555	0.013946	0.029217	0.016002	0.017599	0.012126	0.008848	0.009272	0.010226	0.000906	0.002567	0.0051	0.010246	0.016612	0.013357	0.008435	0.019197	0.003113	0.022379	0.014886	0.025615	0.004161	0.009212	0.00446	0.019421	0.003212	0.005045	0.011147	0.008461	0.051809
Bacillus megaterium DSM319 uid48371	0.053955	0.025956	0.015526	0.016739	0.010088	0.050139	0.014833	0.026685	0.022391	0.009916	0.006232	0.016389	0.007978	0.010013	0.01113	0.001959	0.002643	0.024559	0.011114	0.000463	0.037329	0.035981	0.009385	0.011589	0.015106	0.016416	0.004797	0.005657	0.000555	0.004596	0.002899	0.010115	0.025939	0.015473	0.007219	0.014054	0.010819	0.023489	0.004881	0.010455	0.010832	0.013932	0.002595	0.007843	0.00695	0.011002	0.007646	0.002067	0.055272
Bacillus megaterium QM B1551 uid15862	0.054097	0.025768	0.015662	0.016836	0.009856	0.049923	0.014887	0.026618	0.022287	0.009778	0.006268	0.016561	0.008001	0.009883	0.011208	0.001968	0.002614	0.024615	0.011136	0.000469	0.037181	0.036052	0.009292	0.011517	0.015069	0.016311	0.004748	0.005749	0.000555	0.004562	0.002956	0.010144	0.025869	0.015358	0.007324	0.014207	0.010816	0.023442	0.00492	0.010544	0.010802	0.013886	0.002593	0.007912	0.006997	0.010951	0.007683	0.00207	0.055292
Bacillus megaterium WSH 002 uid159841	0.054145	0.025807	0.015938	0.017037	0.009953	0.049786	0.014778	0.026807	0.022168	0.009875	0.006214	0.016625	0.00805	0.010014	0.011308	0.002087	0.002701	0.024602	0.011333	0.00052	0.036985	0.036358	0.0095	0.011638	0.015231	0.016328	0.004757	0.005744	0.000619	0.004643	0.002971	0.010308	0.025752	0.015188	0.007432	0.014271	0.01107	0.023568	0.004866	0.010386	0.010777	0.013944	0.002503	0.00772	0.006984	0.011025	0.007615	0.00203	0.055081
Bacillus pseudofirmus OF4 uid45847	0.041465	0.026458	0.013108	0.020328	0.010909	0.043144	0.019503	0.028262	0.022714	0.011462	0.007219	0.013328	0.010878	0.010993	0.009033	0.003953	0.002378	0.023662	0.010096	0.00065	0.034782	0.031539	0.011994	0.010816	0.015523	0.014258	0.004762	0.005214	0.000532	0.004278	0.002449	0.009895	0.025652	0.016157	0.006257	0.012473	0.010777	0.024901	0.007467	0.010158	0.011607	0.0137	0.002044	0.008684	0.005435	0.013191	0.00637	0.002951	0.053444
Bacillus pumilus SAFR 032 uid59017	0.049141	0.022844	0.013691	0.021068	0.007547	0.041942	0.023599	0.028374	0.025626	0.008146	0.008235	0.013762	0.010815	0.009837	0.008973	0.002855	0.002217	0.023873	0.009835	0.000486	0.026538	0.031276	0.013724	0.013222	0.015935	0.014148	0.006067	0.005474	0.000722	0.004369	0.002871	0.009436	0.027107	0.018023	0.00691	0.015988	0.009725	0.024168	0.01117	0.013094	0.014163	0.01066	0.002099	0.00898	0.005973	0.010319	0.006234	0.003699	0.050947
Bacillus selenitireducens MLS10 uid49513	0.031145	0.01903	0.017494	0.020563	0.005038	0.029329	0.032863	0.030745	0.015117	0.00533	0.014292	0.021804	0.007761	0.009159	0.009572	0.004949	0.001469	0.019406	0.012627	0.000272	0.008029	0.025488	0.017816	0.012232	0.010989	0.007575	0.012152	0.00942	0.00141	0.003044	0.002925	0.010313	0.010091	0.013672	0.009349	0.026934	0.001722	0.021386	0.023395	0.02636	0.005165	0.008454	0.004634	0.01933	0.005193	0.010368	0.009518	0.011838	0.050729
Bacillus subtilis 168 uid57675	0.049368	0.022233	0.017111	0.020984	0.009392	0.037094	0.026969	0.026985	0.02226	0.0087	0.008581	0.014482	0.010703	0.006614	0.014115	0.003813	0.002143	0.022743	0.012025	0.000481	0.019156	0.030729	0.014126	0.015374	0.01478	0.012836	0.007956	0.006269	0.000769	0.003537	0.004283	0.010298	0.019609	0.015229	0.007379	0.018639	0.004917	0.023147	0.010867	0.023247	0.00696	0.010461	0.003243	0.015872	0.004025	0.007422	0.008427	0.006362	0.049204
Bacillus subtilis 6051 HGW uid193706	0.049384	0.022199	0.017109	0.020978	0.009378	0.037066	0.026992	0.02699	0.022248	0.008668	0.008578	0.014496	0.010696	0.006597	0.014129	0.003813	0.002151	0.02272	0.012005	0.00048	0.019142	0.030699	0.014124	0.01537	0.014789	0.012821	0.007964	0.006271	0.00077	0.003547	0.004286	0.010289	0.019592	0.015226	0.007397	0.018657	0.004902	0.02316	0.010882	0.023243	0.006956	0.010462	0.003248	0.015892	0.004023	0.007433	0.008452	0.006376	0.049261
Bacillus subtilis BAB 1 uid195461	0.049148	0.021583	0.017012	0.02069	0.00902	0.03698	0.02752	0.02705	0.02216	0.008202	0.008743	0.014888	0.010538	0.006264	0.014303	0.003731	0.002157	0.022455	0.011962	0.000485	0.018672	0.030807	0.014319	0.015306	0.014661	0.012652	0.008051	0.006388	0.000789	0.003451	0.004323	0.010185	0.019318	0.015338	0.007451	0.018901	0.004605	0.023343	0.011093	0.023943	0.006769	0.010402	0.003248	0.016426	0.003902	0.007486	0.008677	0.006526	0.048965
Bacillus subtilis BSn5 uid62463	0.048992	0.0217	0.016998	0.020839	0.009253	0.037006	0.027339	0.027076	0.022247	0.008376	0.008698	0.014808	0.010579	0.006363	0.014192	0.003787	0.00216	0.022421	0.011862	0.000494	0.018762	0.030663	0.014249	0.015363	0.014658	0.012597	0.008009	0.006355	0.000819	0.003496	0.00431	0.010255	0.01933	0.015211	0.007421	0.018938	0.00463	0.023277	0.011011	0.023682	0.006908	0.01046	0.00326	0.016242	0.003922	0.007492	0.008579	0.006553	0.048824
Bacillus subtilis BSP1 uid184010	0.048761	0.021429	0.016917	0.020654	0.008957	0.036955	0.027388	0.027219	0.022254	0.008296	0.008685	0.0149	0.010477	0.00636	0.014317	0.003802	0.002104	0.022345	0.011957	0.000481	0.018709	0.03077	0.014355	0.015427	0.014791	0.012693	0.008062	0.006454	0.000802	0.003594	0.004369	0.010258	0.019338	0.015337	0.007468	0.018863	0.004628	0.023289	0.011091	0.023841	0.006882	0.010448	0.003294	0.016359	0.003954	0.007518	0.008735	0.00656	0.048527
Bacillus subtilis natto BEST195 uid183001	0.050224	0.021975	0.017238	0.021193	0.009259	0.037022	0.027148	0.027187	0.02222	0.008352	0.008661	0.014777	0.010689	0.006478	0.013909	0.003855	0.002314	0.022692	0.012122	0.000568	0.019114	0.030981	0.014333	0.01534	0.014562	0.012644	0.007995	0.006284	0.000926	0.003638	0.004298	0.01009	0.019466	0.015097	0.007506	0.018688	0.004837	0.023264	0.010928	0.023327	0.006776	0.010224	0.003277	0.015982	0.004102	0.007564	0.008624	0.006447	0.049186
Bacillus subtilis QB928 uid173926	0.049212	0.022081	0.017102	0.02093	0.009428	0.037027	0.027098	0.027138	0.022254	0.008609	0.00861	0.014565	0.010747	0.006584	0.014183	0.003946	0.002135	0.022707	0.012039	0.000472	0.019079	0.030841	0.014164	0.015506	0.014752	0.012785	0.008016	0.006284	0.000765	0.003632	0.004336	0.010313	0.019447	0.015247	0.007411	0.018644	0.0049	0.02315	0.010939	0.023502	0.006939	0.010418	0.00327	0.015928	0.003998	0.007347	0.008476	0.006404	0.048866
Bacillus subtilis RO NN 1 uid158879	0.049095	0.021528	0.017024	0.020694	0.008889	0.036923	0.027554	0.027181	0.022285	0.008134	0.008787	0.014942	0.01043	0.006261	0.014278	0.003713	0.002191	0.022445	0.011972	0.000514	0.018639	0.030821	0.014361	0.015245	0.014683	0.012619	0.008116	0.006398	0.000838	0.003451	0.004397	0.010199	0.019398	0.015224	0.007489	0.018866	0.004705	0.023331	0.011107	0.023993	0.006796	0.01035	0.003256	0.016398	0.003914	0.00749	0.008631	0.006496	0.048877
Bacillus subtilis spizizenii TU B 10 uid73967	0.049084	0.021782	0.017126	0.020791	0.008991	0.036615	0.027688	0.027191	0.021908	0.008179	0.008705	0.015252	0.010629	0.006479	0.01407	0.003627	0.002202	0.02241	0.01214	0.000488	0.018954	0.03066	0.014384	0.015152	0.014566	0.012793	0.008073	0.006498	0.000848	0.003537	0.004286	0.010194	0.019632	0.015178	0.007516	0.019011	0.004605	0.022709	0.011167	0.024026	0.006551	0.010456	0.003099	0.016489	0.003838	0.007469	0.008592	0.006525	0.049386
Bacillus subtilis spizizenii W23 uid51879	0.04882	0.021483	0.017137	0.020633	0.008867	0.036598	0.027801	0.027246	0.021967	0.008117	0.008698	0.015457	0.010606	0.006384	0.014155	0.003666	0.002168	0.022369	0.012238	0.000468	0.018847	0.030409	0.014362	0.015262	0.014429	0.012637	0.008098	0.006506	0.000789	0.003523	0.004311	0.010076	0.019685	0.015302	0.007564	0.019093	0.00477	0.022634	0.011244	0.023988	0.006589	0.010446	0.003057	0.016672	0.003844	0.007607	0.008619	0.006595	0.049411
Bacillus subtilis XF 1 uid189187	0.04917	0.02167	0.017117	0.020794	0.008837	0.037018	0.02745	0.027172	0.022218	0.008109	0.008677	0.014921	0.010579	0.006205	0.014314	0.003794	0.002145	0.022446	0.011935	0.000481	0.018379	0.030808	0.014368	0.015165	0.014604	0.012592	0.008049	0.006383	0.0008	0.003364	0.004274	0.010192	0.019366	0.015239	0.007329	0.018922	0.004509	0.023228	0.011029	0.023995	0.006708	0.010355	0.003274	0.01641	0.003813	0.007368	0.008607	0.006504	0.049268
Bacillus thuringiensis Al Hakam uid58795	0.056158	0.033312	0.01308	0.017969	0.017159	0.050298	0.013013	0.027658	0.027732	0.01249	0.002609	0.013478	0.009434	0.014234	0.005695	0.002665	0.002276	0.027742	0.009154	0.000517	0.049329	0.032199	0.013916	0.009625	0.014542	0.015429	0.00314	0.004542	0.00047	0.006144	0.002073	0.009855	0.029929	0.016442	0.004792	0.00672	0.010474	0.017804	0.004174	0.003242	0.016456	0.0092	0.001079	0.007571	0.005355	0.013772	0.00469	0.001361	0.056802
Bacillus thuringiensis BMB171 uid49135	0.05621	0.033594	0.01284	0.017977	0.016897	0.050313	0.012854	0.02745	0.027663	0.012463	0.002659	0.012996	0.009355	0.014322	0.005672	0.002335	0.002457	0.027819	0.009329	0.000555	0.049306	0.032581	0.014012	0.009771	0.014746	0.015339	0.003163	0.004541	0.000544	0.00614	0.002075	0.010281	0.029975	0.016371	0.004714	0.006753	0.010411	0.018163	0.004033	0.003186	0.01664	0.009094	0.001184	0.007161	0.005276	0.014081	0.004572	0.00137	0.057143
Bacillus thuringiensis Bt407 uid177931	0.056271	0.033485	0.012955	0.018348	0.017059	0.049814	0.012961	0.027423	0.027705	0.012725	0.002656	0.012957	0.009457	0.014301	0.005743	0.002445	0.00246	0.027673	0.009341	0.000573	0.048672	0.032414	0.013832	0.009682	0.014784	0.015338	0.00309	0.004637	0.000564	0.00616	0.002035	0.010303	0.03055	0.016178	0.004691	0.007057	0.01074	0.018042	0.004132	0.003214	0.016496	0.009286	0.001124	0.007238	0.005493	0.013921	0.004531	0.001374	0.056781
Bacillus thuringiensis HD 771 uid173374	0.05643	0.034482	0.01306	0.018834	0.017692	0.049835	0.012908	0.027313	0.027545	0.013181	0.002925	0.012375	0.009932	0.014717	0.005642	0.002591	0.002491	0.027943	0.009282	0.000609	0.048361	0.032514	0.013528	0.009882	0.014807	0.015481	0.003233	0.004574	0.000595	0.006119	0.002071	0.010293	0.030598	0.015901	0.004562	0.00718	0.010624	0.017821	0.003992	0.003312	0.01603	0.009548	0.001187	0.006951	0.00541	0.013647	0.004353	0.001352	0.056431
Bacillus thuringiensis HD 789 uid173860	0.056235	0.033977	0.012853	0.01844	0.017315	0.050048	0.012798	0.027498	0.027634	0.012787	0.002686	0.012722	0.009522	0.01459	0.00562	0.002524	0.002501	0.027984	0.009244	0.000587	0.048865	0.032523	0.013681	0.009811	0.014744	0.015278	0.003091	0.004623	0.000572	0.006224	0.002063	0.010213	0.030617	0.0162	0.00463	0.007043	0.010613	0.017995	0.004048	0.003314	0.016415	0.009287	0.001143	0.007055	0.005421	0.013837	0.004485	0.001371	0.056865
Bacillus thuringiensis MC28 uid176369	0.056425	0.03363	0.012787	0.018004	0.017135	0.050015	0.012718	0.027631	0.027678	0.01254	0.00256	0.01331	0.009341	0.014461	0.005552	0.002467	0.002517	0.027786	0.009356	0.000549	0.048803	0.032283	0.013798	0.009647	0.01459	0.015095	0.003146	0.004613	0.000575	0.006028	0.001993	0.010304	0.030287	0.01635	0.004405	0.006886	0.010342	0.018073	0.004137	0.003067	0.016353	0.009246	0.001082	0.00737	0.005409	0.013811	0.004449	0.001378	0.056956
Bacillus thuringiensis serovar chinensis CT 43 uid158151	0.056251	0.033495	0.012938	0.01825	0.016878	0.049938	0.012952	0.027501	0.02773	0.012674	0.002627	0.012947	0.009428	0.014258	0.005734	0.002422	0.002481	0.027745	0.009321	0.000578	0.048757	0.032389	0.013855	0.00963	0.014803	0.015365	0.003088	0.004635	0.000582	0.00613	0.002016	0.010315	0.030586	0.016271	0.004714	0.007052	0.010662	0.018046	0.004123	0.00321	0.016454	0.00924	0.001131	0.007199	0.005458	0.014023	0.004555	0.001355	0.056902
Bacillus thuringiensis serovar finitimus YBT 020 uid158875	0.056241	0.033111	0.013184	0.018196	0.01702	0.050068	0.013212	0.02779	0.027414	0.012382	0.002599	0.013561	0.009499	0.014318	0.005669	0.002508	0.00247	0.02779	0.009243	0.000581	0.049375	0.032641	0.014062	0.009544	0.014563	0.015398	0.003261	0.004566	0.000568	0.006208	0.002128	0.010273	0.030066	0.016209	0.004712	0.006779	0.010515	0.017926	0.004282	0.003217	0.016253	0.009165	0.001101	0.007568	0.005436	0.013772	0.004588	0.001407	0.056774
Bacillus thuringiensis serovar IS5056 uid190186	0.05641	0.033533	0.01296	0.018326	0.017038	0.049897	0.01294	0.027406	0.027708	0.012718	0.002638	0.012932	0.009448	0.014282	0.005733	0.002445	0.002497	0.02775	0.009322	0.000578	0.048697	0.032427	0.013851	0.009683	0.014785	0.015346	0.003087	0.004644	0.000579	0.006138	0.002017	0.010309	0.030563	0.016189	0.004668	0.007043	0.010689	0.018002	0.004115	0.003191	0.016513	0.00927	0.001134	0.007246	0.00548	0.013895	0.004523	0.001361	0.05687
Bacillus thuringiensis serovar konkukian 97 27 uid58089	0.055853	0.032989	0.013088	0.017839	0.017271	0.050547	0.013231	0.027787	0.027622	0.012434	0.002603	0.013585	0.009243	0.014359	0.005708	0.002418	0.002434	0.027932	0.009258	0.000541	0.049584	0.032849	0.014121	0.009476	0.014512	0.015394	0.003201	0.004596	0.000524	0.006207	0.002093	0.010071	0.030128	0.016465	0.004758	0.006722	0.010509	0.017949	0.004238	0.003264	0.016293	0.009129	0.001072	0.007526	0.005372	0.013802	0.004767	0.001365	0.056457
Bacillus thuringiensis serovar kurstaki HD73 uid189188	0.056931	0.034082	0.012844	0.01887	0.01721	0.0498	0.01288	0.027432	0.027569	0.012585	0.00286	0.012668	0.009883	0.01443	0.005648	0.002459	0.002531	0.028053	0.009336	0.000602	0.048603	0.032687	0.013507	0.009675	0.014762	0.015348	0.00317	0.004511	0.000609	0.006207	0.002085	0.010253	0.0308	0.016225	0.004678	0.007129	0.010627	0.017807	0.00409	0.003318	0.016274	0.009208	0.001132	0.007118	0.005648	0.013822	0.004532	0.001377	0.057027
Bacillus weihenstephanensis KBAB4 uid58315	0.055642	0.033036	0.012762	0.018393	0.017136	0.050222	0.013034	0.027772	0.027456	0.012582	0.002688	0.012922	0.009346	0.014393	0.005703	0.002552	0.002438	0.027669	0.009254	0.000561	0.048751	0.032543	0.014092	0.009948	0.014601	0.015207	0.003133	0.0048	0.000557	0.006209	0.002127	0.010149	0.030072	0.016136	0.004568	0.007168	0.01058	0.018507	0.004303	0.003239	0.01606	0.009153	0.001142	0.007454	0.00538	0.013807	0.004688	0.001446	0.056651
Bacteriovorax marinus SJ uid82341	0.042339	0.039296	0.013355	0.039687	0.01393	0.044699	0.016408	0.021631	0.018871	0.021674	0.003524	0.00562	0.027041	0.019158	0.007585	0.004393	0.001931	0.02328	0.012749	0.000788	0.026912	0.036683	0.015529	0.007222	0.019601	0.024953	0.004272	0.004202	0.000318	0.00794	0.003078	0.009163	0.021293	0.010069	0.008701	0.008468	0.017995	0.028568	0.014856	0.003795	0.014006	0.012987	0.002355	0.002176	0.002849	0.00355	0.002886	0.000188	0.042946
bacterium BT 1 uid184079	0.046525	0.039227	0.009403	0.017644	0.028303	0.048154	0.012885	0.024317	0.020311	0.016216	0.005797	0.005097	0.00952	0.01229	0.006147	0.004071	0.001959	0.025696	0.004959	0.00057	0.03065	0.038289	0.008499	0.016306	0.017852	0.03111	0.005887	0.003926	0.000828	0.008577	0.002587	0.009918	0.022163	0.018072	0.00325	0.011714	0.006901	0.03108	0.006588	0.007441	0.012613	0.01895	0.002905	0.003695	0.006438	0.020639	0.005429	0.003285	0.044874
Bacteroides fragilis 638R uid84217	0.041358	0.029433	0.020725	0.024279	0.016741	0.026181	0.026292	0.026924	0.014831	0.014658	0.016515	0.0102	0.00642	0.011715	0.009804	0.003366	0.001669	0.030837	0.013962	0.000391	0.012557	0.023973	0.022019	0.023417	0.008707	0.012334	0.009226	0.009986	0.000657	0.006981	0.005415	0.012614	0.015755	0.011914	0.006502	0.018446	0.004707	0.014687	0.00946	0.027613	0.003999	0.011135	0.008691	0.014084	0.003683	0.01678	0.009445	0.007718	0.043318
Bacteroides fragilis NCTC 9343 uid57639	0.042086	0.029877	0.020347	0.023703	0.016947	0.02651	0.026206	0.026867	0.014837	0.014905	0.016348	0.009886	0.006417	0.011756	0.009535	0.003319	0.001685	0.031111	0.013659	0.000403	0.013135	0.024503	0.021673	0.023333	0.008824	0.012492	0.009047	0.009898	0.000646	0.007033	0.005255	0.012637	0.0159	0.011873	0.006416	0.018443	0.004735	0.014569	0.009269	0.027715	0.004002	0.011167	0.008568	0.014159	0.0036	0.016738	0.009338	0.007711	0.043755
Bacteroides fragilis YCH46 uid58195	0.041901	0.029667	0.020399	0.02397	0.017259	0.02626	0.025947	0.026975	0.014931	0.014657	0.016168	0.01004	0.00661	0.01176	0.009688	0.003516	0.001746	0.031001	0.013756	0.000445	0.013168	0.024669	0.021657	0.023258	0.008981	0.012619	0.009195	0.00993	0.000697	0.007237	0.005459	0.012599	0.015956	0.01198	0.006563	0.018281	0.004851	0.01471	0.009281	0.027307	0.004053	0.011164	0.008577	0.014055	0.003788	0.016633	0.009498	0.007756	0.043442
Bacteroides helcogenes P 36 108 uid62135	0.03598	0.028337	0.021986	0.028676	0.019259	0.024345	0.02431	0.02799	0.014615	0.013993	0.017142	0.010661	0.00579	0.010089	0.012404	0.003471	0.001593	0.029623	0.014904	0.000382	0.009694	0.021722	0.023636	0.025465	0.007598	0.012308	0.01182	0.007108	0.000759	0.005962	0.007273	0.012266	0.015853	0.011958	0.007193	0.017422	0.003831	0.015496	0.009796	0.027873	0.003976	0.011178	0.010302	0.011214	0.002982	0.015882	0.013572	0.00594	0.043194
Bacteroides salanitronis DSM 18170 uid63269	0.033919	0.022568	0.025518	0.028581	0.015286	0.021789	0.028725	0.027596	0.012408	0.008851	0.019613	0.014459	0.00471	0.00674	0.014543	0.003853	0.001677	0.027164	0.017998	0.000289	0.009694	0.017855	0.026519	0.026603	0.006414	0.008684	0.008291	0.013009	0.000935	0.005275	0.008444	0.012875	0.016952	0.011698	0.008222	0.01799	0.002816	0.014276	0.009441	0.028744	0.003106	0.009968	0.010098	0.014446	0.002406	0.014293	0.015584	0.009785	0.04761
Bacteroides thetaiotaomicron VPI 5482 uid62913	0.041079	0.031805	0.02063	0.025553	0.016208	0.026134	0.026393	0.027061	0.015988	0.01556	0.01436	0.011013	0.006965	0.012004	0.010269	0.002785	0.001686	0.032549	0.013907	0.000357	0.012721	0.022591	0.02295	0.021	0.008628	0.013427	0.010789	0.007802	0.000513	0.006789	0.005418	0.013633	0.015016	0.012065	0.006087	0.019892	0.004625	0.014725	0.008607	0.028318	0.004237	0.01162	0.007287	0.014581	0.003345	0.017051	0.009071	0.006199	0.046834
Bacteroides uniformis uid13130	0.049555	0.026366	0.028907	0.03399	0.025413	0.023189	0.021601	0.024778	0.018742	0.009848	0.019377	0.007624	0.017471	0.008895	0.012389	0.008577	0.001906	0.029225	0.015883	0.000635	0.012706	0.02446	0.023189	0.022872	0.011436	0.015248	0.012071	0.003812	0.000953	0.007624	0.007942	0.013659	0.025095	0.014295	0.009212	0.018424	0.008895	0.020013	0.007306	0.019695	0.007306	0.008259	0.006353	0.011118	0.008577	0.00953	0.008895	0.00413	0.057497
Bacteroides vulgatus ATCC 8482 uid58253	0.042853	0.032443	0.019713	0.025052	0.019545	0.027614	0.021522	0.028072	0.015357	0.015616	0.016035	0.008504	0.006878	0.011918	0.009804	0.003777	0.001709	0.03314	0.012184	0.000352	0.013922	0.024342	0.021251	0.028032	0.008961	0.01254	0.010235	0.006378	0.000609	0.007455	0.005491	0.013351	0.016691	0.013969	0.005795	0.017333	0.004818	0.013051	0.005652	0.024599	0.004136	0.01295	0.008621	0.011414	0.002667	0.018288	0.008999	0.006289	0.046351
Bacteroides xylanisolvens XB1A uid197168	0.043912	0.032589	0.020137	0.023807	0.016474	0.028799	0.024126	0.027311	0.016357	0.015804	0.013738	0.010986	0.006599	0.012273	0.009596	0.002687	0.0018	0.033056	0.013015	0.000374	0.014093	0.0231	0.022169	0.024579	0.008593	0.013928	0.009829	0.007494	0.000564	0.007072	0.005015	0.01336	0.017538	0.012156	0.005796	0.017181	0.005136	0.015256	0.007967	0.021995	0.004619	0.011933	0.006575	0.01411	0.003215	0.017628	0.008506	0.005935	0.048448
Bartonella australis Aust NH1 uid189950	0.042422	0.030599	0.009761	0.014748	0.013701	0.042322	0.017866	0.023236	0.018465	0.013787	0.00812	0.011466	0.005917	0.010234	0.008997	0.003377	0.001662	0.020663	0.007644	0.00043	0.027144	0.03434	0.009604	0.018013	0.012615	0.019647	0.006612	0.008227	0.000913	0.005867	0.004428	0.010993	0.023878	0.014072	0.007161	0.012845	0.00596	0.026442	0.012091	0.00737	0.010419	0.015338	0.00644	0.007984	0.005858	0.020401	0.014798	0.006457	0.043116
Bartonella bacilliformis KC583 uid58533	0.043978	0.03487	0.008094	0.013497	0.013536	0.0495	0.01454	0.024953	0.024171	0.013824	0.007244	0.007811	0.005973	0.011247	0.006737	0.00218	0.002005	0.023264	0.004554	0.000456	0.029667	0.037485	0.006946	0.019246	0.015956	0.021702	0.004904	0.004451	0.000839	0.007558	0.003035	0.010908	0.028519	0.018829	0.005108	0.011582	0.005929	0.029227	0.008192	0.006014	0.013062	0.017704	0.004598	0.004312	0.005664	0.024279	0.010763	0.004382	0.045296
Bartonella clarridgeiae 73 uid62131	0.049615	0.039098	0.007887	0.01288	0.016727	0.053798	0.013289	0.02408	0.024884	0.015481	0.006419	0.006178	0.005741	0.01256	0.005578	0.002043	0.002106	0.025135	0.003913	0.000436	0.032366	0.038352	0.006575	0.017546	0.016529	0.022064	0.004566	0.004447	0.000683	0.007909	0.00265	0.009937	0.029275	0.018399	0.004349	0.010235	0.006149	0.03037	0.007531	0.004427	0.013614	0.016425	0.003754	0.003555	0.006746	0.02456	0.008228	0.003825	0.046919
Bartonella grahamii as4aup uid59405	0.046357	0.034194	0.009812	0.015849	0.0138	0.045058	0.014241	0.023294	0.023833	0.011708	0.008996	0.009536	0.006547	0.012439	0.007991	0.002287	0.001862	0.024315	0.004543	0.000425	0.026865	0.0374	0.006786	0.019357	0.014118	0.021255	0.00571	0.004956	0.000786	0.007288	0.002793	0.010743	0.029311	0.018494	0.004917	0.01054	0.005403	0.030598	0.009811	0.005676	0.012092	0.015386	0.00575	0.00409	0.005177	0.021982	0.010384	0.004147	0.04532
Bartonella henselae Houston 1 uid57745	0.045912	0.033404	0.009591	0.015025	0.013626	0.045931	0.014523	0.024125	0.023549	0.012864	0.008614	0.008366	0.0063	0.011928	0.007317	0.002404	0.001849	0.023376	0.004696	0.000401	0.026404	0.03743	0.00688	0.019987	0.014423	0.02071	0.005989	0.00505	0.000923	0.007579	0.00312	0.010565	0.029249	0.01887	0.005146	0.011324	0.005253	0.031248	0.010533	0.006136	0.013105	0.016014	0.00562	0.004312	0.005455	0.023338	0.010772	0.004248	0.045456
Bartonella quintana RM 11 uid174512	0.044244	0.032194	0.009175	0.014479	0.012956	0.047045	0.015309	0.024565	0.022985	0.012344	0.008337	0.008308	0.00558	0.011021	0.00704	0.002286	0.001804	0.022509	0.004707	0.000411	0.025719	0.038294	0.00741	0.02098	0.014583	0.01979	0.005856	0.005567	0.000916	0.007655	0.00326	0.01062	0.028091	0.018707	0.005033	0.011779	0.005166	0.032053	0.010469	0.006501	0.013349	0.016119	0.005366	0.004463	0.005733	0.023987	0.011331	0.005296	0.045139
Bartonella quintana Toulouse uid57635	0.044041	0.032376	0.009321	0.01456	0.013064	0.047017	0.015453	0.024532	0.023052	0.012418	0.008313	0.008345	0.005525	0.011274	0.006998	0.002236	0.001793	0.022474	0.004793	0.000365	0.025658	0.037922	0.007476	0.020873	0.014594	0.019742	0.005974	0.005581	0.00084	0.007604	0.003229	0.010536	0.028163	0.018697	0.005129	0.011836	0.005281	0.0319	0.010486	0.006442	0.013429	0.016196	0.005541	0.004533	0.005743	0.023902	0.011389	0.005266	0.044873
Bartonella tribocorum CIP 105476 uid59129	0.046359	0.033002	0.009329	0.016246	0.012777	0.043601	0.014801	0.023428	0.022332	0.00996	0.010605	0.010222	0.006738	0.012598	0.00837	0.002499	0.001839	0.024754	0.004533	0.000455	0.02648	0.037482	0.006439	0.020332	0.013185	0.020005	0.006067	0.004794	0.000941	0.007593	0.002885	0.01135	0.030158	0.018998	0.004997	0.010059	0.004744	0.029967	0.010154	0.005979	0.011304	0.015189	0.006972	0.004455	0.00504	0.02213	0.011352	0.004974	0.046304
Bartonella vinsonii berkhoffii Winnie uid189951	0.045415	0.032351	0.008672	0.014804	0.012953	0.046294	0.013855	0.02449	0.023795	0.012002	0.008663	0.008858	0.006121	0.011513	0.007326	0.002116	0.001816	0.02316	0.004402	0.000425	0.025958	0.037808	0.006987	0.02075	0.014024	0.020678	0.005964	0.004651	0.0009	0.007598	0.0028	0.010556	0.029224	0.019339	0.004818	0.010665	0.004781	0.031921	0.010683	0.005894	0.012907	0.01584	0.006016	0.004187	0.00544	0.023548	0.011226	0.00477	0.046342
Baumannia cicadellinicola Hc Homalodisca coagulata uid58111	0.047044	0.045715	0.010923	0.01194	0.036249	0.051547	0.010626	0.024355	0.016652	0.026369	0.005837	0.00392	0.007703	0.018278	0.007033	0.002264	0.002545	0.028853	0.00689	0.000966	0.053469	0.030969	0.006343	0.007304	0.012523	0.01722	0.002699	0.002857	0.000511	0.0099	0.003404	0.011051	0.031419	0.021437	0.004043	0.013202	0.025439	0.014956	0.00366	0.003992	0.017332	0.013851	0.001942	0.002954	0.005684	0.025704	0.00597	0.002172	0.040297
Bdellovibrio bacteriovorus HD100 uid61595	0.041036	0.017882	0.023387	0.024183	0.001981	0.020473	0.033406	0.026064	0.009368	0.013147	0.021217	0.011778	0.004576	0.008181	0.013273	0.001307	0.001568	0.016523	0.013957	0.000907	0.003932	0.019518	0.025179	0.023839	0.006489	0.01334	0.019818	0.008035	0.000583	0.004103	0.005466	0.012038	0.013672	0.007877	0.011061	0.025706	0.002634	0.017048	0.003836	0.046543	0.007691	0.009067	0.007618	0.017477	0.003002	0.014833	0.020268	0.003554	0.042822
Bdellovibrio bacteriovorus Tiberius uid182482	0.041886	0.019101	0.022787	0.023493	0.001777	0.0213	0.033033	0.025897	0.00912	0.014143	0.020759	0.012071	0.004497	0.008018	0.013355	0.001129	0.001648	0.01719	0.013823	0.000874	0.004205	0.019216	0.02539	0.023958	0.006912	0.013878	0.019159	0.008167	0.000595	0.004121	0.005428	0.012087	0.014046	0.007907	0.010861	0.025554	0.002777	0.017585	0.002873	0.044876	0.008103	0.008849	0.006785	0.017693	0.002893	0.015634	0.019917	0.002772	0.0456
Bdellovibrio exovorus JSS uid194119	0.050747	0.028476	0.01579	0.01803	0.006235	0.032486	0.024753	0.023227	0.019121	0.016104	0.008067	0.010108	0.007476	0.012673	0.0105	0.001256	0.001797	0.018227	0.013404	0.000907	0.032755	0.030418	0.017164	0.020598	0.014353	0.019513	0.005744	0.010069	0.000532	0.005902	0.003613	0.010986	0.028225	0.011838	0.008396	0.017079	0.010579	0.01872	0.005083	0.012722	0.012463	0.012804	0.005083	0.00812	0.004439	0.017281	0.014267	0.001726	0.044196
Beijerinckia indica ATCC 9039 uid59057	0.015122	0.018524	0.009361	0.020989	0.002969	0.01665	0.037315	0.021787	0.00806	0.005337	0.021129	0.019726	0.002301	0.004537	0.013958	0.003377	0.000815	0.018112	0.005115	0.000434	0.002797	0.013526	0.026469	0.018918	0.004624	0.004662	0.014058	0.014746	0.001859	0.002598	0.006231	0.01257	0.013043	0.017024	0.006098	0.020511	0.002321	0.017042	0.034745	0.030678	0.00686	0.00786	0.016001	0.02307	0.004216	0.012384	0.028479	0.014851	0.030644
Belliella baltica DSM 15883 uid168182	0.054517	0.039848	0.014712	0.019906	0.015696	0.037361	0.025053	0.023733	0.016974	0.016721	0.010261	0.005288	0.021334	0.013352	0.007833	0.006535	0.001938	0.026296	0.011488	0.000447	0.02349	0.038033	0.01602	0.027303	0.015525	0.017502	0.007461	0.003948	0.000666	0.004665	0.002266	0.011207	0.025167	0.01274	0.005097	0.010987	0.009348	0.021047	0.007992	0.007722	0.014213	0.014155	0.004024	0.003411	0.004255	0.003478	0.002154	0.001595	0.053047
beta proteobacterium CB uid191340	0.029358	0.024724	0.01302	0.025713	0.004358	0.039336	0.019364	0.025968	0.010157	0.017739	0.01475	0.007386	0.005632	0.010225	0.013064	0.002605	0.002141	0.015248	0.010923	0.000531	0.022902	0.02678	0.012871	0.027601	0.011801	0.014834	0.008428	0.005473	0.000663	0.004033	0.00546	0.013064	0.025095	0.012908	0.007381	0.015949	0.011275	0.014204	0.014262	0.01304	0.018009	0.013073	0.007722	0.00699	0.004854	0.016694	0.017381	0.002692	0.030022
Beutenbergia cavernae DSM 12333 uid59047	0.000169	0.000285	0.014741	0.010683	8.3e-05	0.000221	0.031762	0.014864	0.001416	0.000893	0.023678	0.035149	0.00037	0.000661	0.013409	0.002296	3.1e-05	0.000665	0.018599	0.000393	1.7e-05	0.000227	0.027302	0.001623	0.001037	0.00053	0.014329	0.020457	0.002494	0.000264	0.004925	0.0165	0.000536	0.001116	0.019137	0.023432	0.000275	0.001103	0.057881	0.041268	0.00142	0.001827	0.01829	0.038274	0.003671	0.005387	0.037647	0.028758	0.002947
Bibersteinia trehalosi 192 uid193709	0.050242	0.034771	0.014979	0.008513	0.005064	0.046059	0.016433	0.023116	0.014311	0.013954	0.015012	0.008979	0.003739	0.012353	0.013177	0.000746	0.00226	0.022902	0.008232	0.000519	0.04055	0.032079	0.01183	0.017778	0.011645	0.012532	0.003815	0.00542	0.000349	0.005943	0.003905	0.011567	0.035982	0.012932	0.008047	0.013298	0.010192	0.016593	0.008591	0.009869	0.015468	0.010836	0.003222	0.007277	0.005371	0.020089	0.011161	0.002595	0.04617
Bifidobacterium adolescentis ATCC 15703 uid58559	0.012645	0.009373	0.025278	0.030505	0.002622	0.010947	0.040102	0.026742	0.004386	0.004123	0.031854	0.017993	0.002178	0.002462	0.012993	0.003078	0.000607	0.009111	0.017973	0.000373	0.00126	0.003632	0.031203	0.012582	0.003345	0.00284	0.024773	0.014024	0.001732	0.001734	0.008587	0.013442	0.007753	0.011224	0.011218	0.027034	0.00193	0.009945	0.020269	0.040882	0.004454	0.003819	0.008065	0.029055	0.004756	0.01666	0.025797	0.006435	0.031362
Bifidobacterium animalis ATCC 25527 uid162513	0.007908	0.010658	0.024469	0.028858	0.003244	0.012753	0.03784	0.027713	0.005332	0.003211	0.027722	0.022495	0.00193	0.002952	0.013213	0.00321	0.000387	0.008946	0.017868	0.00058	0.000393	0.001901	0.032453	0.010767	0.003704	0.002136	0.015883	0.020141	0.001828	0.001447	0.008268	0.013029	0.006254	0.012148	0.011854	0.030568	0.001339	0.006619	0.034805	0.034052	0.004824	0.003408	0.011079	0.026951	0.003913	0.013004	0.031275	0.007608	0.021499
Bifidobacterium animalis lactis AD011 uid58911	0.007927	0.010635	0.024097	0.028243	0.003356	0.01226	0.038095	0.027828	0.005552	0.003126	0.027454	0.022289	0.001929	0.003053	0.013314	0.003561	0.000381	0.009082	0.017935	0.000563	0.000524	0.001922	0.032676	0.010584	0.003728	0.002142	0.015792	0.020044	0.001854	0.001467	0.008635	0.013225	0.006132	0.011904	0.012174	0.030291	0.001324	0.006785	0.034589	0.033989	0.004988	0.003458	0.010967	0.027309	0.004018	0.013058	0.031395	0.007702	0.021531
Bifidobacterium animalis lactis B420 uid163691	0.007967	0.01056	0.02409	0.028356	0.003349	0.012452	0.038135	0.027718	0.005438	0.003109	0.027509	0.022175	0.001893	0.002979	0.013334	0.003377	0.000392	0.009051	0.017829	0.000589	0.000496	0.00191	0.03266	0.010607	0.00363	0.002147	0.01589	0.020056	0.001864	0.001461	0.008486	0.013149	0.006094	0.01204	0.012093	0.030403	0.001314	0.006797	0.034634	0.034062	0.00484	0.003493	0.011012	0.027201	0.003951	0.013047	0.031483	0.007573	0.021587
Bifidobacterium animalis lactis BB 12 uid158871	0.008256	0.010979	0.023468	0.027245	0.00383	0.012477	0.036517	0.027755	0.006093	0.003466	0.026757	0.02195	0.002635	0.003339	0.013382	0.004148	0.000419	0.009198	0.017269	0.000591	0.000754	0.002538	0.031635	0.010957	0.004199	0.002581	0.015646	0.019745	0.00181	0.00202	0.009252	0.013142	0.006719	0.012678	0.01292	0.029773	0.001541	0.007558	0.033455	0.032796	0.005532	0.003845	0.011131	0.026539	0.005013	0.013471	0.03125	0.008695	0.021851
Bifidobacterium animalis lactis Bi 07 uid163693	0.00793	0.010565	0.024039	0.02825	0.003374	0.012464	0.038063	0.027757	0.005458	0.003128	0.027467	0.022188	0.001941	0.002983	0.013292	0.003396	0.000397	0.009066	0.017796	0.000602	0.000516	0.001975	0.03265	0.01061	0.00367	0.002182	0.015891	0.020036	0.001896	0.001524	0.008561	0.013146	0.006136	0.012105	0.012145	0.030356	0.001317	0.006816	0.034598	0.034009	0.004866	0.00353	0.011029	0.027195	0.003974	0.013086	0.03151	0.007617	0.021523
Bifidobacterium animalis lactis Bl 04 uid59359	0.008065	0.010693	0.024213	0.02848	0.003387	0.012488	0.038064	0.027821	0.005486	0.00316	0.027559	0.022384	0.001908	0.002966	0.01334	0.003425	0.00039	0.009133	0.017882	0.000588	0.000507	0.001989	0.032602	0.01066	0.003648	0.002169	0.015745	0.019994	0.00184	0.001426	0.008477	0.013143	0.006094	0.011968	0.011986	0.030391	0.001327	0.006784	0.034489	0.033969	0.004892	0.00348	0.010911	0.027134	0.003939	0.013036	0.031323	0.007569	0.021596
Bifidobacterium animalis lactis Bl12 uid210081	0.00807	0.01072	0.024137	0.028444	0.003399	0.012413	0.037913	0.027825	0.005557	0.003211	0.027543	0.022348	0.001966	0.003049	0.013336	0.003528	0.000382	0.009118	0.017866	0.000558	0.000555	0.002002	0.032483	0.010605	0.003744	0.002216	0.015832	0.020016	0.001785	0.001449	0.008493	0.013201	0.006188	0.011952	0.012067	0.030384	0.001356	0.006848	0.034386	0.033833	0.005019	0.003536	0.010989	0.02717	0.004011	0.013133	0.031301	0.00764	0.021619
Bifidobacterium animalis lactis BLC1 uid158867	0.008074	0.010716	0.024142	0.028444	0.003398	0.012418	0.037919	0.027832	0.005551	0.003211	0.027548	0.022351	0.001957	0.003042	0.013332	0.003529	0.000383	0.009119	0.017867	0.000559	0.000555	0.002001	0.032489	0.010604	0.003737	0.002214	0.01583	0.020018	0.001785	0.001446	0.008485	0.013199	0.006187	0.011946	0.012063	0.030386	0.001356	0.006844	0.034396	0.033839	0.005018	0.003538	0.010987	0.027177	0.00401	0.013133	0.031291	0.007638	0.021617
Bifidobacterium animalis lactis CNCM I 2494 uid158869	0.008315	0.011026	0.023506	0.027217	0.003863	0.012495	0.03643	0.027765	0.006162	0.003483	0.026667	0.021922	0.002675	0.003337	0.013391	0.00417	0.00042	0.009198	0.017238	0.000606	0.000776	0.002581	0.031577	0.011014	0.004218	0.002626	0.015652	0.019729	0.001809	0.00203	0.009244	0.01316	0.006767	0.012693	0.012979	0.029762	0.001551	0.00757	0.033374	0.032762	0.005564	0.003854	0.011154	0.026571	0.005016	0.013432	0.031262	0.008692	0.021904
Bifidobacterium animalis lactis DSM 10140 uid59357	0.008072	0.01069	0.02418	0.028447	0.003385	0.012492	0.03805	0.027817	0.005479	0.00316	0.027538	0.022373	0.00191	0.002965	0.013343	0.003423	0.000386	0.009136	0.017891	0.000593	0.00051	0.001993	0.032607	0.010654	0.003641	0.002177	0.015724	0.019976	0.001843	0.001443	0.008494	0.013159	0.006106	0.011987	0.012014	0.030376	0.00132	0.006779	0.034492	0.033963	0.004894	0.003493	0.010914	0.027134	0.003989	0.013038	0.031328	0.00759	0.021585
Bifidobacterium animalis lactis V9 uid158865	0.008062	0.010679	0.024212	0.028468	0.003385	0.012456	0.038048	0.027832	0.005473	0.003152	0.027572	0.022328	0.001913	0.002963	0.013352	0.003451	0.000389	0.009145	0.017898	0.00059	0.000511	0.00199	0.032631	0.010645	0.003646	0.002171	0.015751	0.019974	0.001839	0.001429	0.008508	0.013207	0.006099	0.011961	0.012029	0.030374	0.001328	0.006798	0.034465	0.033966	0.004889	0.003476	0.010919	0.027143	0.00396	0.013022	0.031317	0.007587	0.021593
Bifidobacterium asteroides PRL2011 uid176921	0.006771	0.009171	0.020568	0.028983	0.005004	0.010571	0.035643	0.025693	0.006064	0.006187	0.035899	0.009827	0.003516	0.003774	0.015481	0.00878	0.0004	0.009592	0.016573	0.000395	0.001125	0.005299	0.026693	0.009991	0.005764	0.004409	0.023346	0.011604	0.001845	0.001748	0.007271	0.014188	0.006924	0.009708	0.011849	0.036506	0.002407	0.008511	0.015506	0.059514	0.00524	0.008775	0.022515	0.013673	0.00538	0.011015	0.020902	0.016033	0.013563
Bifidobacterium bifidum BGN4 uid167988	0.006671	0.005796	0.026321	0.03318	0.003132	0.006094	0.0423	0.025646	0.00383	0.002972	0.032436	0.022285	0.001591	0.002311	0.014275	0.003472	0.000464	0.007555	0.018957	0.000501	0.000466	0.002206	0.030349	0.007494	0.003297	0.002176	0.021609	0.018227	0.00195	0.001106	0.008225	0.01301	0.004384	0.008848	0.012623	0.028811	0.00106	0.005678	0.022979	0.047172	0.002544	0.003023	0.013589	0.027802	0.00414	0.01155	0.030834	0.010663	0.018212
Bifidobacterium bifidum PRL2010 uid59883	0.006339	0.005674	0.026486	0.033455	0.002966	0.00592	0.042627	0.02561	0.003754	0.002838	0.032626	0.022136	0.001457	0.002294	0.014433	0.003531	0.000429	0.007463	0.019272	0.000437	0.000416	0.002014	0.030573	0.007243	0.003264	0.002064	0.021728	0.018259	0.001896	0.000937	0.008251	0.012892	0.004279	0.008805	0.012638	0.029035	0.000987	0.005451	0.023127	0.047781	0.002423	0.003056	0.013496	0.027598	0.004013	0.011346	0.031138	0.010576	0.017908
Bifidobacterium bifidum S17 uid59545	0.006362	0.005682	0.02637	0.03323	0.003002	0.005929	0.04268	0.025879	0.003723	0.002865	0.032446	0.022379	0.00148	0.002336	0.014457	0.003452	0.00044	0.007331	0.019135	0.000463	0.000387	0.002025	0.030401	0.007409	0.003185	0.00211	0.021603	0.018367	0.001962	0.001101	0.008303	0.012861	0.004326	0.00879	0.012657	0.028966	0.000985	0.005502	0.022911	0.047806	0.002504	0.003056	0.013551	0.027911	0.004019	0.011452	0.030823	0.010634	0.017865
Bifidobacterium breve ACS 071 V Sch8b uid158863	0.008938	0.010732	0.023669	0.031019	0.00261	0.016082	0.036136	0.025974	0.004399	0.007196	0.034426	0.014237	0.001406	0.003192	0.012273	0.002219	0.00077	0.009866	0.01702	0.000538	0.001317	0.00587	0.029078	0.014437	0.003911	0.004548	0.024389	0.012672	0.001525	0.001611	0.007491	0.013606	0.007247	0.010461	0.01134	0.026718	0.002434	0.009461	0.019795	0.042049	0.004141	0.005429	0.011564	0.024978	0.004841	0.016273	0.025819	0.005587	0.025801
Bifidobacterium breve UCC2003 uid193702	0.009156	0.01067	0.023477	0.030724	0.00277	0.015812	0.036012	0.025879	0.00448	0.007186	0.03422	0.01449	0.001712	0.003202	0.012401	0.002694	0.00076	0.009815	0.017102	0.00052	0.001386	0.005873	0.029133	0.014238	0.003962	0.004583	0.024052	0.012757	0.001463	0.00169	0.007746	0.013754	0.007392	0.010528	0.011459	0.026669	0.00246	0.009584	0.020035	0.041465	0.004316	0.00544	0.011809	0.024732	0.004965	0.015925	0.02593	0.006238	0.025697
Bifidobacterium dentium Bd1 uid43091	0.009925	0.011729	0.023267	0.029843	0.002715	0.011831	0.041522	0.027542	0.003816	0.00445	0.034176	0.017702	0.002173	0.003472	0.012608	0.004098	0.000507	0.012122	0.0166	0.000596	0.001035	0.004187	0.031284	0.014146	0.003843	0.002692	0.024923	0.013973	0.001706	0.001787	0.008284	0.014457	0.007234	0.012214	0.008636	0.026231	0.002648	0.010047	0.019685	0.040363	0.004105	0.003825	0.007697	0.027954	0.004885	0.017307	0.021887	0.007091	0.029049
Bifidobacterium longum BBMN68 uid60163	0.00823	0.008718	0.025694	0.03298	0.002028	0.013441	0.038689	0.025044	0.003737	0.005833	0.037407	0.014968	0.001081	0.002721	0.012285	0.002009	0.000682	0.008225	0.018951	0.000554	0.000927	0.004089	0.030243	0.012286	0.003203	0.003667	0.024951	0.013121	0.001586	0.001303	0.007426	0.013353	0.006787	0.008532	0.012555	0.026715	0.00197	0.007511	0.021309	0.04318	0.00307	0.004091	0.012089	0.026582	0.004449	0.014355	0.028428	0.005426	0.026262
Bifidobacterium longum DJO10A uid58833	0.008685	0.008625	0.02556	0.031965	0.002074	0.01279	0.038668	0.025336	0.003769	0.005398	0.037271	0.015512	0.001233	0.002687	0.012811	0.002477	0.000698	0.008169	0.019009	0.000555	0.0009	0.003984	0.030148	0.012254	0.003328	0.00353	0.024548	0.013196	0.00165	0.001273	0.007604	0.01397	0.006946	0.008613	0.012749	0.026697	0.001842	0.007261	0.021815	0.043052	0.003303	0.003999	0.012529	0.026373	0.004692	0.014083	0.028773	0.00614	0.026509
Bifidobacterium longum F8 uid197184	0.008597	0.008634	0.025503	0.032376	0.002262	0.013224	0.038874	0.026071	0.003871	0.005551	0.037419	0.015061	0.00125	0.002651	0.012729	0.002359	0.000721	0.008211	0.019009	0.000578	0.000959	0.004104	0.030194	0.012068	0.00331	0.003547	0.024354	0.013057	0.001664	0.001347	0.007733	0.014079	0.007074	0.008542	0.012741	0.026721	0.001973	0.007356	0.021567	0.042935	0.003323	0.004174	0.012507	0.026277	0.004666	0.013693	0.02883	0.005891	0.026883
Bifidobacterium longum infantis 157F uid62693	0.008786	0.008668	0.025509	0.032464	0.002204	0.012934	0.038228	0.025207	0.003857	0.00564	0.036963	0.015284	0.001237	0.002734	0.012835	0.002558	0.000686	0.008326	0.018944	0.000553	0.000946	0.004009	0.029775	0.012274	0.00326	0.00357	0.024493	0.013005	0.00166	0.001352	0.007643	0.013898	0.006947	0.008712	0.012631	0.027038	0.001836	0.007403	0.021657	0.042936	0.003397	0.004188	0.012401	0.026389	0.004628	0.01416	0.028817	0.006189	0.026444
Bifidobacterium longum infantis ATCC 15697 uid159865	0.009762	0.009057	0.024561	0.030062	0.003594	0.011919	0.038442	0.026429	0.004328	0.004877	0.033958	0.016941	0.002217	0.003118	0.01273	0.003879	0.000702	0.009155	0.018091	0.000585	0.001586	0.00443	0.029537	0.013101	0.003807	0.003476	0.023118	0.01389	0.001883	0.001683	0.008239	0.014469	0.007346	0.009674	0.011975	0.025839	0.002202	0.00797	0.022058	0.04228	0.003789	0.003982	0.013311	0.025841	0.005058	0.013826	0.027595	0.008498	0.025587
Bifidobacterium longum infantis ATCC 15697 uid58677	0.009793	0.009156	0.024458	0.030003	0.003707	0.012006	0.038221	0.026452	0.004486	0.004961	0.033735	0.016915	0.002373	0.00323	0.012711	0.00403	0.000666	0.009241	0.018072	0.000536	0.001735	0.004572	0.02932	0.013181	0.003867	0.003582	0.022916	0.013847	0.001804	0.001788	0.008307	0.014475	0.007436	0.009694	0.011994	0.025724	0.002334	0.008134	0.021982	0.042105	0.003906	0.004085	0.013283	0.025666	0.00514	0.013862	0.027579	0.008624	0.025567
Bifidobacterium longum JCM 1217 uid62695	0.008539	0.00862	0.025459	0.032317	0.002061	0.012798	0.03792	0.025096	0.003819	0.005721	0.03663	0.015931	0.001269	0.002743	0.012532	0.002584	0.000639	0.008226	0.018906	0.00057	0.000925	0.003832	0.029419	0.012105	0.003202	0.00356	0.024571	0.012887	0.001603	0.001386	0.007587	0.013797	0.006805	0.008663	0.012507	0.026522	0.001839	0.007214	0.021769	0.042689	0.003226	0.004081	0.012782	0.0267	0.004532	0.014075	0.028896	0.006557	0.02623
Bifidobacterium longum JDM301 uid49131	0.008816	0.009164	0.024821	0.031197	0.002447	0.012922	0.038176	0.025585	0.004016	0.005485	0.035892	0.015596	0.00159	0.002993	0.012361	0.002709	0.00068	0.008664	0.018304	0.000537	0.001052	0.004244	0.030157	0.01281	0.003563	0.003663	0.024567	0.013473	0.001556	0.001559	0.007978	0.013777	0.007226	0.009065	0.01256	0.026387	0.00198	0.007781	0.020999	0.043208	0.003734	0.004316	0.012241	0.026473	0.004896	0.014311	0.028331	0.006858	0.026103
Bifidobacterium longum KACC 91563 uid158861	0.008805	0.008994	0.025177	0.03196	0.00227	0.013329	0.038134	0.025371	0.003881	0.005813	0.036542	0.015214	0.00131	0.002933	0.012571	0.002507	0.00068	0.008539	0.018676	0.000563	0.001079	0.004357	0.029814	0.012596	0.003468	0.003839	0.024626	0.01324	0.001643	0.001436	0.007605	0.013641	0.007147	0.008781	0.012623	0.026688	0.002024	0.00761	0.021275	0.0429	0.003499	0.004282	0.012277	0.026141	0.004841	0.014258	0.028528	0.006073	0.026533
Bifidobacterium longum NCC2705 uid57939	0.008438	0.008969	0.025209	0.032024	0.002272	0.013438	0.037832	0.02491	0.004192	0.005876	0.036946	0.015359	0.001334	0.002932	0.012396	0.002119	0.000637	0.008246	0.018472	0.000534	0.001163	0.004308	0.029718	0.012419	0.00376	0.003944	0.024859	0.013268	0.001517	0.001679	0.0077	0.013531	0.007273	0.008933	0.012939	0.026645	0.002055	0.007683	0.020991	0.042345	0.00377	0.004495	0.012164	0.026582	0.004976	0.014574	0.028468	0.005839	0.026202
Bifidobacterium thermophilum RBL67 uid193770	0.010752	0.009581	0.021926	0.026318	0.002042	0.012707	0.038185	0.024682	0.006794	0.005148	0.031427	0.019455	0.001982	0.003471	0.01501	0.003389	0.000551	0.010285	0.016711	0.000402	0.000828	0.003121	0.028822	0.013021	0.005344	0.003558	0.019895	0.016127	0.001958	0.001698	0.008266	0.013433	0.010058	0.01245	0.011664	0.027995	0.001578	0.009381	0.023536	0.036488	0.004195	0.0052	0.010421	0.028419	0.00399	0.014408	0.026951	0.010897	0.025273
Blastococcus saxobsidens DD2 uid89391	0.000424	0.000609	0.013885	0.013727	0.000226	0.000473	0.029256	0.015206	0.001089	0.00104	0.038619	0.018302	0.000452	0.001102	0.01466	0.001996	8.5e-05	0.000742	0.016612	0.000396	8.8e-05	0.000438	0.02514	0.003043	0.001104	0.000699	0.014998	0.016364	0.0028	0.000502	0.006704	0.014484	0.001076	0.001397	0.01903	0.026744	0.000648	0.00121	0.036711	0.064382	0.001906	0.001913	0.021376	0.036991	0.003516	0.004775	0.034669	0.037557	0.004771
Blattabacterium Blaberus giganteus uid165873	0.105935	0.058673	0.007819	0.00706	0.049462	0.060789	0.009151	0.022241	0.01695	0.017955	0.003136	0.002804	0.020643	0.012256	0.001894	0.001538	0.00208	0.039291	0.00508	0.000271	0.053698	0.053774	0.005955	0.014035	0.013101	0.034241	0.00509	0.00202	0.000523	0.009206	0.001467	0.008307	0.025357	0.020879	0.002211	0.002523	0.005161	0.012608	0.001377	0.001528	0.009935	0.016849	0.00197	0.001176	0.003201	0.007337	0.000347	0.000467	0.054985
Blattabacterium Blatta orientalis Tarazona uid188115	0.095285	0.051433	0.008103	0.013143	0.04336	0.054957	0.012667	0.022322	0.013737	0.018757	0.004934	0.00356	0.022017	0.012459	0.002688	0.003296	0.001861	0.035607	0.005664	0.000426	0.048325	0.05049	0.008392	0.014999	0.009903	0.035587	0.008788	0.002196	0.000614	0.008296	0.001785	0.00861	0.024411	0.020065	0.002759	0.00428	0.008717	0.016287	0.002434	0.002606	0.011435	0.016855	0.002475	0.001841	0.003144	0.008215	0.00069	0.000862	0.055312
Blattabacterium Blattella germanica Bge uid41533	0.099707	0.054275	0.00873	0.008686	0.043819	0.058302	0.011139	0.021872	0.016446	0.018296	0.003527	0.00276	0.021615	0.012262	0.002493	0.001944	0.00184	0.035554	0.005485	0.000346	0.048859	0.051931	0.007622	0.017901	0.01246	0.035638	0.006326	0.002033	0.000712	0.00917	0.001716	0.008517	0.027155	0.020606	0.002562	0.003344	0.006158	0.014052	0.001969	0.00227	0.010506	0.01659	0.00232	0.001434	0.002894	0.007375	0.000509	0.000505	0.0566
Blattabacterium Cryptocercus punctulatus Cpu uid81083	0.112611	0.064832	0.004426	0.006982	0.053	0.067464	0.007723	0.02027	0.013894	0.019453	0.003357	0.002369	0.018524	0.012573	0.001112	0.002036	0.002138	0.041957	0.003958	0.000365	0.058763	0.056604	0.004581	0.009265	0.012348	0.035512	0.006456	0.002218	0.000424	0.008706	0.00079	0.008604	0.023519	0.018293	0.001348	0.002046	0.006402	0.013878	0.000929	0.000773	0.012863	0.015296	0.001584	0.000913	0.003437	0.007514	0.000188	0.000752	0.054128
Blattabacterium Mastotermes darwiniensis MADAR uid77127	0.09581	0.054322	0.007693	0.013257	0.047992	0.057554	0.010492	0.022238	0.014833	0.018207	0.005379	0.003102	0.022151	0.01254	0.002124	0.003564	0.002027	0.037115	0.006373	0.000435	0.04722	0.050084	0.007976	0.017109	0.010269	0.032415	0.010437	0.002901	0.000652	0.008775	0.001538	0.008796	0.023444	0.019902	0.002135	0.003124	0.007547	0.015506	0.001679	0.001755	0.011921	0.016523	0.001918	0.001261	0.003336	0.009128	0.000326	0.000543	0.055164
Blattabacterium Panesthia angustipennis spadica BPAA uid193717	0.102186	0.056469	0.007639	0.008237	0.045378	0.059211	0.012211	0.022106	0.017006	0.017823	0.003498	0.003219	0.020823	0.012252	0.00183	0.001916	0.001962	0.037592	0.004765	0.000335	0.052028	0.052956	0.006716	0.01507	0.012591	0.035103	0.006154	0.002063	0.000618	0.009281	0.001384	0.008485	0.02758	0.021954	0.002114	0.003168	0.006022	0.01322	0.001941	0.001972	0.010143	0.016783	0.002529	0.001429	0.003107	0.007249	0.000309	0.000674	0.055348
Blattabacterium Periplaneta americana BPLAN uid41287	0.095843	0.051445	0.008015	0.012704	0.042948	0.055327	0.012333	0.022194	0.013768	0.018472	0.005121	0.003551	0.021823	0.012679	0.002493	0.003285	0.001821	0.03554	0.005477	0.000461	0.04815	0.050733	0.008165	0.015297	0.009735	0.035525	0.009043	0.002177	0.000612	0.008301	0.001715	0.008722	0.024872	0.020178	0.002718	0.004303	0.008446	0.016396	0.002463	0.002508	0.011456	0.017013	0.002518	0.001811	0.003145	0.008165	0.000772	0.000873	0.055713
Bordetella avium 197N uid61563	0.010678	0.01193	0.015574	0.019264	0.002234	0.011949	0.032651	0.024189	0.003584	0.003689	0.024365	0.017587	0.001014	0.003668	0.018633	0.001948	0.000786	0.012604	0.01175	0.000339	0.001771	0.012548	0.021422	0.019497	0.002675	0.004322	0.011141	0.015154	0.001947	0.001752	0.007134	0.014181	0.012803	0.011132	0.010074	0.029105	0.003614	0.007328	0.016504	0.06214	0.00321	0.007528	0.019371	0.021364	0.00299	0.014113	0.040407	0.010497	0.025196
Bordetella bronchiseptica 253 uid178913	0.003609	0.005178	0.018677	0.021915	0.001571	0.004044	0.037667	0.024345	0.00106	0.001096	0.027605	0.018131	0.000372	0.001102	0.017842	0.00185	0.000432	0.00707	0.017316	0.000622	0.000194	0.003886	0.028561	0.007471	0.000627	0.000723	0.009509	0.019163	0.001979	0.000797	0.008524	0.014037	0.005879	0.007273	0.014466	0.034154	0.000653	0.002188	0.012426	0.084755	0.001448	0.002032	0.020542	0.030653	0.001175	0.004185	0.053885	0.013308	0.019919
Bordetella bronchiseptica MO149 uid177517	0.003482	0.005017	0.018774	0.021763	0.001487	0.003791	0.037955	0.024151	0.000932	0.000968	0.027789	0.01806	0.000346	0.001029	0.017907	0.001747	0.00042	0.006865	0.017449	0.000613	0.000194	0.003704	0.028783	0.007217	0.000574	0.000639	0.009571	0.019296	0.001955	0.000767	0.008525	0.013903	0.00578	0.00717	0.014589	0.034369	0.000545	0.00201	0.012564	0.085678	0.001209	0.001935	0.020655	0.030798	0.001021	0.003941	0.054389	0.013163	0.019784
Bordetella bronchiseptica RB50 uid57613	0.003752	0.005329	0.018704	0.022132	0.001614	0.004188	0.037501	0.024277	0.00114	0.001204	0.027557	0.018199	0.000411	0.001173	0.01785	0.001935	0.000441	0.007097	0.017363	0.000618	0.000221	0.004023	0.028368	0.007674	0.00071	0.000762	0.009538	0.019043	0.001996	0.000819	0.008457	0.014034	0.006015	0.007327	0.014394	0.034057	0.00074	0.002288	0.012482	0.083917	0.001537	0.002158	0.020459	0.03043	0.001299	0.004284	0.053419	0.013382	0.019966
Bordetella parapertussis 12822 uid57615	0.00374	0.005376	0.018618	0.022051	0.001629	0.004139	0.037571	0.024168	0.001055	0.00111	0.027591	0.018021	0.000454	0.00115	0.017675	0.001894	0.000446	0.007271	0.01727	0.000629	0.000249	0.003996	0.028581	0.007944	0.000661	0.00071	0.009562	0.019189	0.001965	0.000908	0.008549	0.014125	0.006107	0.007532	0.014492	0.034036	0.000703	0.00223	0.012463	0.084627	0.001518	0.002128	0.020446	0.030383	0.001324	0.004427	0.053873	0.013318	0.020126
Bordetella parapertussis 18323 uid175569	0.004067	0.005426	0.019082	0.023203	0.001391	0.004052	0.038256	0.0232	0.001134	0.00127	0.028663	0.01719	0.000511	0.001051	0.017086	0.001496	0.000461	0.0067	0.017886	0.000755	0.000208	0.003993	0.028622	0.008646	0.000797	0.000697	0.009787	0.018911	0.001854	0.001001	0.008046	0.014085	0.006652	0.008109	0.016025	0.034844	0.001225	0.001961	0.012311	0.082727	0.001475	0.002535	0.020157	0.029117	0.0025	0.004914	0.055326	0.012024	0.020048
Bordetella parapertussis Bpp5 uid177516	0.004013	0.005328	0.018907	0.022866	0.001601	0.004388	0.037809	0.024127	0.001181	0.001235	0.027789	0.018016	0.000496	0.001232	0.017558	0.001915	0.000471	0.00713	0.017384	0.000619	0.000268	0.004069	0.028791	0.007867	0.000766	0.000777	0.009717	0.019063	0.002008	0.000881	0.008484	0.014168	0.006327	0.007313	0.014486	0.034116	0.000836	0.002406	0.012793	0.083498	0.001635	0.002263	0.020055	0.029963	0.001507	0.004638	0.053057	0.013213	0.020373
Bordetella pertussis CS uid158859	0.003991	0.005419	0.019118	0.023087	0.001444	0.004055	0.038177	0.023323	0.001128	0.001259	0.0285	0.017412	0.000502	0.001069	0.017259	0.001531	0.000461	0.006731	0.017839	0.000716	0.000213	0.003964	0.028695	0.008483	0.000783	0.000712	0.009795	0.019047	0.001878	0.000983	0.007997	0.014127	0.00656	0.007964	0.015767	0.034565	0.001144	0.001989	0.012278	0.083089	0.001496	0.002498	0.020243	0.029177	0.002307	0.004867	0.05478	0.012228	0.020002
Bordetella pertussis Tohama I uid57617	0.004007	0.005418	0.01913	0.023119	0.001435	0.004074	0.038223	0.023246	0.001135	0.001273	0.028613	0.017333	0.00051	0.001063	0.017236	0.001503	0.000461	0.006698	0.017895	0.000729	0.000214	0.003991	0.028724	0.008505	0.000788	0.000711	0.009807	0.01901	0.001865	0.000991	0.007956	0.014153	0.00661	0.008006	0.015895	0.034576	0.00119	0.00198	0.012271	0.082975	0.001497	0.002527	0.020246	0.02907	0.002405	0.004907	0.054869	0.012162	0.020019
Bordetella petrii uid61631	0.007762	0.006137	0.0185	0.020177	0.002162	0.008511	0.033285	0.024229	0.002498	0.002939	0.026355	0.017207	0.000766	0.002054	0.01726	0.001773	0.000626	0.007528	0.017011	0.000636	0.000776	0.006239	0.02642	0.011411	0.001894	0.002234	0.009565	0.018677	0.001887	0.001149	0.008521	0.014824	0.009375	0.007746	0.014816	0.031901	0.002016	0.004557	0.012511	0.076566	0.003303	0.003961	0.021574	0.025782	0.002705	0.005973	0.049201	0.013755	0.026961
Borrelia afzelii HLJ01 uid177930	0.081076	0.05991	0.012921	0.021065	0.039328	0.060677	0.007806	0.017697	0.017686	0.015284	0.004866	0.001837	0.020845	0.015676	0.009178	0.006401	0.001956	0.034767	0.007536	0.000641	0.043038	0.056611	0.006055	0.017513	0.017308	0.026393	0.00326	0.002601	0.000616	0.004647	0.001934	0.005029	0.018857	0.009365	0.002817	0.003721	0.008245	0.030431	0.002327	0.001981	0.008886	0.011682	0.003264	0.001207	0.001729	0.001887	0.0008	0.000418	0.04995
Borrelia afzelii PKo uid159867	0.081286	0.059896	0.01312	0.021079	0.03965	0.060672	0.007848	0.017584	0.017849	0.015349	0.004897	0.001892	0.020832	0.015649	0.009193	0.006292	0.001828	0.03475	0.007615	0.000576	0.043027	0.056569	0.00602	0.017291	0.017366	0.02638	0.00323	0.002608	0.00054	0.004611	0.001874	0.004958	0.018876	0.009382	0.002847	0.003716	0.008331	0.030472	0.002282	0.00196	0.008942	0.011707	0.003244	0.00123	0.001721	0.001914	0.000794	0.000404	0.050156
Borrelia afzelii PKo uid58653	0.081438	0.059831	0.013063	0.021197	0.039687	0.06058	0.007848	0.017695	0.017819	0.015278	0.004873	0.001876	0.020791	0.015596	0.009162	0.006339	0.001866	0.034762	0.007636	0.000583	0.043178	0.056969	0.006074	0.017409	0.01737	0.026338	0.003233	0.002618	0.000548	0.004639	0.001933	0.00501	0.018861	0.009356	0.002837	0.00371	0.008445	0.030444	0.002265	0.001989	0.008901	0.011621	0.003244	0.001219	0.001742	0.001919	0.000784	0.00041	0.049959
Borrelia bissettii DN127 uid71231	0.081419	0.05939	0.013273	0.021291	0.039534	0.059874	0.00777	0.017766	0.017469	0.014812	0.005228	0.00204	0.02086	0.014564	0.010617	0.006379	0.001839	0.033829	0.008347	0.000552	0.041466	0.056557	0.005884	0.018239	0.017443	0.026264	0.003198	0.002714	0.000531	0.004281	0.002148	0.004977	0.018587	0.009186	0.003109	0.004005	0.008336	0.030796	0.002126	0.002485	0.008942	0.011269	0.003822	0.001298	0.001757	0.001714	0.000864	0.000402	0.050283
Borrelia burgdorferi B31 uid57581	0.080135	0.05899	0.013021	0.021911	0.039709	0.059954	0.007748	0.018079	0.017147	0.014818	0.005086	0.00198	0.021217	0.014556	0.010398	0.006463	0.002146	0.033655	0.008323	0.000746	0.041617	0.056772	0.005709	0.01823	0.017329	0.02639	0.003297	0.002543	0.000758	0.004539	0.002301	0.005138	0.018468	0.009228	0.00311	0.00413	0.008308	0.030659	0.002222	0.002313	0.008922	0.011089	0.003789	0.00123	0.001662	0.001781	0.000861	0.000452	0.049817
Borrelia burgdorferi CA382 uid214794	0.080465	0.059369	0.013179	0.021699	0.039552	0.059955	0.007712	0.017825	0.017416	0.014913	0.005202	0.001964	0.021124	0.01454	0.010304	0.006308	0.001845	0.033689	0.008347	0.000556	0.041559	0.056853	0.005694	0.018187	0.017369	0.026656	0.003342	0.002563	0.000539	0.004448	0.00214	0.005008	0.018442	0.009144	0.003109	0.004114	0.008419	0.030717	0.00214	0.002316	0.008882	0.011338	0.00382	0.001213	0.001637	0.001799	0.000869	0.000413	0.050114
Borrelia burgdorferi JD1 uid161197	0.081134	0.059569	0.013267	0.021671	0.039975	0.059813	0.00769	0.017768	0.01734	0.014811	0.005224	0.001957	0.021077	0.014465	0.010346	0.006249	0.001809	0.033981	0.008492	0.000551	0.041639	0.056739	0.005768	0.018057	0.017414	0.02634	0.003391	0.002561	0.00054	0.004387	0.002176	0.004973	0.018506	0.00911	0.003133	0.004172	0.008636	0.030523	0.002172	0.002377	0.008905	0.011293	0.003794	0.00119	0.001653	0.001752	0.000876	0.000424	0.050664
Borrelia burgdorferi N40 uid161241	0.080692	0.05927	0.013266	0.021472	0.039813	0.059994	0.007754	0.017835	0.017427	0.014912	0.005161	0.001983	0.021103	0.014475	0.010451	0.006301	0.001793	0.033813	0.008439	0.000552	0.041685	0.056774	0.00572	0.018069	0.017459	0.0264	0.003382	0.002571	0.000552	0.004318	0.002173	0.004985	0.018452	0.009128	0.00312	0.004096	0.008575	0.030679	0.002159	0.002295	0.008948	0.011251	0.003848	0.001212	0.00165	0.001736	0.000886	0.000423	0.050268
Borrelia burgdorferi ZS7 uid59429	0.080434	0.059422	0.013222	0.021746	0.039583	0.059894	0.007739	0.017811	0.017368	0.015006	0.00513	0.001944	0.021063	0.014512	0.01037	0.006322	0.001835	0.033878	0.008437	0.000563	0.041632	0.056966	0.005788	0.01816	0.017386	0.026579	0.003336	0.002631	0.000538	0.004378	0.002155	0.004949	0.018334	0.009124	0.003165	0.004102	0.008455	0.030794	0.002115	0.002235	0.008938	0.011365	0.003844	0.001188	0.001646	0.001791	0.000879	0.000425	0.050109
Borrelia crocidurae Achema uid162335	0.074246	0.063103	0.010075	0.020784	0.041571	0.060101	0.008336	0.019282	0.020458	0.016374	0.003356	0.00211	0.021491	0.019254	0.004287	0.006082	0.001764	0.03832	0.00526	0.000658	0.044199	0.054698	0.005004	0.017039	0.01789	0.023982	0.002285	0.002215	0.000602	0.006114	0.001288	0.005204	0.021561	0.012	0.002275	0.004245	0.008143	0.028087	0.002999	0.001638	0.00941	0.012276	0.002068	0.0007	0.002215	0.003209	0.000462	0.000462	0.04983
Borrelia duttonii Ly uid58791	0.073858	0.06292	0.010014	0.020766	0.041684	0.060037	0.008238	0.019346	0.020439	0.016363	0.003397	0.002124	0.021515	0.019266	0.0043	0.006086	0.001666	0.038164	0.005207	0.000638	0.044329	0.054874	0.004969	0.017521	0.017766	0.024015	0.002279	0.002238	0.000524	0.006169	0.001186	0.005169	0.021432	0.012038	0.002204	0.004252	0.008114	0.028205	0.002931	0.001655	0.009345	0.012211	0.002007	0.000697	0.0022	0.003197	0.000469	0.00049	0.049661
Borrelia garinii BgVir uid162165	0.081079	0.059573	0.012817	0.021757	0.04005	0.060484	0.007946	0.017682	0.017167	0.015201	0.004861	0.001916	0.021153	0.01528	0.009912	0.006637	0.001984	0.034613	0.007788	0.000622	0.043102	0.056445	0.006194	0.01666	0.017371	0.02636	0.003324	0.002599	0.000768	0.00445	0.002195	0.005061	0.018365	0.009547	0.002713	0.003975	0.008814	0.030449	0.002305	0.001991	0.008836	0.011631	0.003453	0.001129	0.001826	0.001776	0.000815	0.000415	0.04994
Borrelia garinii NMJW1 uid177081	0.081035	0.059719	0.012769	0.021473	0.040057	0.060639	0.007724	0.017613	0.017209	0.015272	0.004845	0.00193	0.020868	0.015376	0.00984	0.006617	0.001837	0.034658	0.007763	0.000569	0.042933	0.056242	0.006105	0.016571	0.017445	0.026393	0.003223	0.002621	0.000505	0.004365	0.002073	0.005006	0.018344	0.009535	0.002653	0.00395	0.008873	0.030536	0.002263	0.001919	0.008826	0.011745	0.003466	0.001178	0.001737	0.001776	0.00077	0.000394	0.050363
Borrelia garinii PBi uid58125	0.081293	0.059972	0.012905	0.021531	0.040243	0.060764	0.007802	0.017663	0.017145	0.015307	0.004643	0.001959	0.021164	0.015439	0.009611	0.006456	0.001842	0.034729	0.007723	0.000575	0.043369	0.056585	0.006074	0.016396	0.017381	0.026428	0.003183	0.002584	0.000528	0.004436	0.002066	0.005032	0.018451	0.009529	0.002666	0.003844	0.008755	0.030525	0.002306	0.002016	0.008897	0.011781	0.003394	0.001163	0.001752	0.001792	0.000814	0.000393	0.050318
Borrelia hermsii DAH uid59225	0.064489	0.056327	0.01142	0.029156	0.038823	0.05689	0.01037	0.019551	0.018306	0.016224	0.004137	0.002868	0.021536	0.018894	0.006946	0.008562	0.00161	0.03542	0.007113	0.000709	0.041139	0.050848	0.007749	0.016116	0.017833	0.022394	0.003132	0.002121	0.000525	0.005208	0.001829	0.005221	0.018379	0.011489	0.00251	0.005468	0.010008	0.030501	0.003855	0.002586	0.009209	0.012021	0.002753	0.00121	0.002204	0.002785	0.000793	0.000862	0.045773
Borrelia miyamotoi LB 2001 uid215233	0.069834	0.057993	0.011855	0.026589	0.040915	0.058936	0.009725	0.019128	0.018935	0.0165	0.003466	0.002264	0.022372	0.019607	0.006369	0.00774	0.001626	0.036133	0.006855	0.000748	0.040843	0.052295	0.007338	0.016936	0.018206	0.023442	0.002856	0.001981	0.000559	0.005516	0.001644	0.005142	0.018685	0.01138	0.002272	0.005244	0.009932	0.02959	0.003103	0.002537	0.009145	0.01212	0.00213	0.000925	0.002065	0.002743	0.000526	0.000581	0.047309
Borrelia recurrentis A1 uid58793	0.074258	0.063356	0.009947	0.020791	0.041994	0.06038	0.008258	0.019308	0.02044	0.016424	0.003281	0.002118	0.021472	0.019298	0.004278	0.006112	0.001664	0.038337	0.005275	0.000646	0.044374	0.05497	0.00497	0.017304	0.017751	0.024023	0.002306	0.002249	0.000529	0.006102	0.001199	0.005101	0.021572	0.011955	0.00221	0.004296	0.008099	0.028131	0.002927	0.001678	0.009287	0.012235	0.002004	0.000717	0.002214	0.003175	0.000454	0.000451	0.049859
Borrelia turicatae 91E135 uid58311	0.068599	0.056746	0.012274	0.025941	0.039644	0.057292	0.010626	0.019497	0.01925	0.01616	0.004136	0.002499	0.021725	0.019577	0.005812	0.007585	0.001665	0.035918	0.00683	0.000667	0.041754	0.05255	0.006855	0.01706	0.018034	0.022823	0.002975	0.002117	0.000511	0.005662	0.001533	0.005179	0.018687	0.011603	0.002506	0.005158	0.009086	0.029814	0.003705	0.002492	0.009149	0.012034	0.002506	0.001036	0.002179	0.002979	0.000584	0.000754	0.047816
Borrelia valaisiana VS116 uid54823	0.095293	0.063465	0.015434	0.020941	0.039449	0.050528	0.008646	0.021262	0.017419	0.018316	0.004867	0.003138	0.018252	0.021069	0.010183	0.006916	0.005636	0.037848	0.010631	0.002113	0.051553	0.063721	0.009094	0.018188	0.016843	0.020621	0.003778	0.003202	0.001345	0.007109	0.00365	0.003522	0.021582	0.00967	0.003778	0.004035	0.010759	0.022286	0.002498	0.003586	0.008069	0.006276	0.003714	0.001665	0.001473	0.001921	0.001409	0.00032	0.045533
Brachybacterium faecium DSM 4810 uid58649	0.000456	0.000752	0.014914	0.015045	0.000128	0.000283	0.038781	0.018739	0.000892	0.000969	0.042683	0.015334	0.00041	0.000421	0.014332	0.001866	2.5e-05	0.00151	0.016256	0.000126	2.8e-05	0.00017	0.027325	0.000751	0.000741	0.000792	0.023595	0.015181	0.002702	0.00023	0.005079	0.014291	0.000356	0.00356	0.019416	0.029142	0.000174	0.00077	0.047628	0.057955	0.000713	0.001714	0.026098	0.03019	0.002461	0.004322	0.046606	0.020549	0.00381
Brachyspira hyodysenteriae WA1 uid59291	0.075924	0.068648	0.008619	0.011981	0.069633	0.029904	0.004645	0.025116	0.020437	0.02471	0.001628	0.000757	0.026438	0.013578	0.008707	0.002164	0.002433	0.043624	0.006536	0.00022	0.045855	0.036193	0.011988	0.012158	0.018252	0.023522	0.002215	0.001026	0.000357	0.00511	0.003442	0.005934	0.011875	0.012259	0.000882	0.008515	0.004577	0.02146	0.001324	0.001009	0.005184	0.018772	0.000349	0.001441	0.000248	0.001803	0.000378	3.1e-05	0.057403
Brachyspira intermedia PWS A uid158369	0.075954	0.06844	0.009082	0.012065	0.068159	0.029465	0.005013	0.025159	0.020293	0.025411	0.001658	0.000832	0.026252	0.01381	0.008549	0.002251	0.002466	0.043823	0.006639	0.000249	0.045679	0.035857	0.011996	0.012162	0.018228	0.02289	0.002213	0.001073	0.000366	0.005398	0.003366	0.006355	0.012652	0.012234	0.000919	0.008091	0.004536	0.021235	0.001295	0.000916	0.005527	0.018585	0.000509	0.001517	0.00025	0.001877	0.000385	3.4e-05	0.056917
Brachyspira murdochii DSM 12563 uid48819	0.077159	0.065232	0.010954	0.011889	0.068781	0.030139	0.00416	0.025064	0.01929	0.024424	0.00228	0.001305	0.02581	0.01401	0.009773	0.002865	0.002332	0.041969	0.008573	0.000344	0.04166	0.040489	0.007892	0.012063	0.017269	0.023025	0.002228	0.001704	0.000349	0.005009	0.003962	0.006138	0.010366	0.011718	0.001334	0.010031	0.005274	0.023913	0.001722	0.001689	0.006213	0.016292	0.000797	0.002318	0.000414	0.002368	0.000589	7.6e-05	0.0547
Brachyspira pilosicoli 95 1000 uid50609	0.073885	0.062169	0.013466	0.014598	0.065828	0.034014	0.003684	0.024634	0.0204	0.025697	0.001582	0.000966	0.025451	0.013393	0.009932	0.003094	0.002469	0.042903	0.006288	0.000221	0.047128	0.041303	0.006991	0.011089	0.014403	0.026147	0.001195	0.001078	0.000319	0.005481	0.003296	0.006091	0.014196	0.011212	0.001687	0.005885	0.005193	0.021917	0.001655	0.000578	0.007546	0.017405	0.000355	0.001353	0.000217	0.002088	0.000589	1.4e-05	0.049109
Brachyspira pilosicoli B2904 uid175255	0.074903	0.06201	0.013225	0.014865	0.065676	0.034294	0.003665	0.024683	0.020542	0.025574	0.001614	0.001047	0.025557	0.013576	0.009664	0.003117	0.002587	0.043341	0.006259	0.000349	0.047348	0.041662	0.00714	0.011101	0.014466	0.02541	0.001242	0.001104	0.00035	0.005865	0.00331	0.006323	0.014817	0.011404	0.001801	0.005982	0.005366	0.021338	0.001702	0.000666	0.007429	0.017384	0.000361	0.001397	0.000398	0.002117	0.000593	6.1e-05	0.048785
Brachyspira pilosicoli P43 6 78 uid184077	0.073231	0.061654	0.013447	0.014686	0.065843	0.033977	0.0037	0.024832	0.020402	0.025866	0.001614	0.000963	0.025553	0.01339	0.009882	0.003052	0.002581	0.043096	0.006232	0.000258	0.047103	0.041485	0.007029	0.011209	0.014323	0.02617	0.001187	0.001079	0.000329	0.005605	0.003282	0.006131	0.014351	0.011278	0.001682	0.005929	0.005282	0.021849	0.001723	0.000598	0.00761	0.017501	0.000363	0.001343	0.000241	0.002128	0.000591	2e-05	0.048142
Brachyspira pilosicoli WesB uid175256	0.075211	0.062866	0.013159	0.014401	0.066512	0.034328	0.003712	0.024547	0.020221	0.025342	0.001613	0.001023	0.025365	0.013544	0.00974	0.003094	0.0025	0.043124	0.006179	0.000292	0.047585	0.041974	0.006975	0.011081	0.014553	0.02563	0.001275	0.001121	0.00034	0.005866	0.003364	0.006329	0.014728	0.011326	0.001638	0.005944	0.005265	0.021225	0.001699	0.000696	0.007504	0.017113	0.000382	0.00144	0.000289	0.00211	0.00058	3.2e-05	0.049037
Bradyrhizobium BTAi1 uid58505	0.004704	0.009145	0.016546	0.028639	0.000665	0.005844	0.046086	0.022812	0.002906	0.002084	0.028329	0.020204	0.001129	0.001903	0.016694	0.003025	0.000365	0.012037	0.009862	0.000634	0.000394	0.005538	0.030717	0.008889	0.002294	0.001598	0.011463	0.021558	0.002127	0.001286	0.007216	0.013371	0.004905	0.01074	0.009928	0.028034	0.00104	0.00569	0.032266	0.053077	0.003132	0.003197	0.012608	0.034082	0.003257	0.006919	0.04053	0.017089	0.013176
Bradyrhizobium japonicum USDA 110 uid57599	0.00589	0.008553	0.018953	0.030196	0.001382	0.006257	0.044836	0.023763	0.003227	0.00248	0.027986	0.020367	0.001674	0.002203	0.016628	0.004341	0.000507	0.010247	0.011781	0.00085	0.000709	0.006532	0.0307	0.008494	0.002845	0.00201	0.012843	0.021446	0.00179	0.001335	0.007835	0.013142	0.005733	0.009192	0.011393	0.026066	0.001604	0.007808	0.034544	0.045183	0.003373	0.003726	0.014132	0.031208	0.004182	0.006646	0.03975	0.015226	0.015631
Bradyrhizobium japonicum USDA 6 uid158851	0.006252	0.008853	0.01883	0.030687	0.001308	0.006461	0.045161	0.023833	0.003179	0.002507	0.027846	0.020376	0.00141	0.002198	0.016238	0.003962	0.000563	0.010657	0.011948	0.000946	0.000638	0.006614	0.030978	0.008904	0.002777	0.001915	0.012557	0.02131	0.001878	0.001228	0.007452	0.013434	0.005731	0.009095	0.011123	0.026161	0.001611	0.007638	0.034732	0.045127	0.003323	0.003601	0.014293	0.031162	0.003806	0.006754	0.039147	0.014657	0.016436
Bradyrhizobium ORS 278 uid58941	0.00397	0.008035	0.018113	0.030159	0.000595	0.004783	0.046884	0.023379	0.002607	0.002029	0.028976	0.020827	0.001004	0.001698	0.016887	0.002874	0.000355	0.010742	0.011162	0.000676	0.000319	0.004523	0.031502	0.007459	0.002073	0.001487	0.011781	0.022381	0.002121	0.001072	0.007516	0.013231	0.004139	0.00966	0.01056	0.028632	0.000999	0.004604	0.033428	0.053123	0.002734	0.002911	0.012811	0.034605	0.002862	0.00606	0.04241	0.015565	0.011139
Bradyrhizobium S23321 uid158167	0.005492	0.008441	0.019135	0.031812	0.000897	0.00589	0.046817	0.024414	0.002751	0.002142	0.029406	0.02022	0.001012	0.001892	0.016124	0.003492	0.000561	0.010712	0.011991	0.000869	0.000402	0.005951	0.03184	0.007735	0.002149	0.001508	0.012926	0.022095	0.001825	0.000995	0.007449	0.013093	0.004762	0.008812	0.010833	0.026803	0.001169	0.006645	0.0344	0.048327	0.002653	0.003134	0.014377	0.031754	0.002789	0.00639	0.039958	0.013995	0.015958
Brevibacillus brevis NBRC 100599 uid59175	0.032647	0.019529	0.01646	0.02405	0.006475	0.030153	0.029668	0.028185	0.016098	0.008482	0.012851	0.018817	0.00626	0.008618	0.012294	0.00314	0.001717	0.018035	0.015108	0.000768	0.009945	0.024665	0.016483	0.028142	0.007187	0.00994	0.012099	0.009379	0.000759	0.003229	0.00439	0.012208	0.023913	0.014062	0.007787	0.018879	0.007126	0.013575	0.015726	0.026072	0.012014	0.010056	0.005065	0.013525	0.007645	0.012197	0.012732	0.006812	0.039949
Brevundimonas subvibrioides ATCC 15264 uid42117	0.003133	0.004206	0.019191	0.021321	0.000458	0.002158	0.042168	0.022073	0.001696	0.001007	0.034792	0.020075	0.00084	0.001393	0.013729	0.002465	0.000268	0.009785	0.010517	0.000822	0.00012	0.002632	0.032176	0.003315	0.001246	0.001159	0.013167	0.021406	0.002086	0.001013	0.00597	0.014588	0.002027	0.005274	0.012076	0.028138	0.00065	0.004285	0.015604	0.073483	0.001318	0.0024	0.022677	0.029028	0.00332	0.006605	0.037067	0.023933	0.01464
Brucella abortus A13334 uid83615	0.012487	0.016401	0.014331	0.030179	0.003523	0.018146	0.037165	0.025559	0.006286	0.003194	0.021668	0.019538	0.001409	0.002753	0.012923	0.003308	0.001054	0.017854	0.005666	0.000544	0.001132	0.013493	0.026073	0.009529	0.003906	0.003468	0.015037	0.016757	0.002013	0.001709	0.006628	0.011755	0.006416	0.013645	0.007178	0.025453	0.001408	0.024197	0.020589	0.039328	0.004564	0.005717	0.011396	0.02663	0.002143	0.012513	0.038294	0.009032	0.038788
Brucella abortus bv 1 9 941 uid58019	0.012763	0.016393	0.01426	0.03038	0.003728	0.018186	0.036897	0.02556	0.006315	0.003353	0.021615	0.019405	0.001584	0.002795	0.012858	0.003254	0.001034	0.017699	0.00576	0.000536	0.001348	0.013531	0.025802	0.009681	0.003991	0.003627	0.01497	0.016719	0.001962	0.001786	0.006561	0.011439	0.006503	0.013618	0.007187	0.025565	0.00151	0.0242	0.020422	0.039089	0.004619	0.005789	0.011439	0.026495	0.002331	0.01266	0.038339	0.009148	0.039253
Brucella abortus S19 uid58873	0.012451	0.016463	0.014307	0.030314	0.003556	0.018119	0.037237	0.025471	0.006262	0.003242	0.021794	0.019551	0.00141	0.002803	0.012926	0.003225	0.00098	0.017791	0.005657	0.0005	0.001161	0.013344	0.025895	0.009544	0.003921	0.003489	0.015039	0.016784	0.001878	0.001664	0.006437	0.011576	0.006373	0.01364	0.007113	0.025494	0.001408	0.024234	0.020543	0.039369	0.004514	0.005767	0.011405	0.026595	0.002161	0.012494	0.038345	0.008995	0.039077
Brucella canis ATCC 23365 uid59009	0.012785	0.016368	0.014368	0.03014	0.003785	0.018043	0.037044	0.025594	0.006282	0.003359	0.021675	0.019413	0.001591	0.00278	0.012974	0.003283	0.001068	0.017804	0.005698	0.000548	0.001355	0.01363	0.026141	0.009686	0.003917	0.003635	0.015112	0.016652	0.001905	0.001853	0.006731	0.011696	0.006533	0.013724	0.007331	0.025306	0.001464	0.024275	0.020554	0.039009	0.004694	0.005738	0.011468	0.026515	0.002406	0.012523	0.037966	0.00922	0.038708
Brucella canis HSK A52141 uid83613	0.012381	0.016357	0.014342	0.030278	0.003466	0.01802	0.037325	0.025547	0.006243	0.00318	0.021767	0.0196	0.001329	0.002714	0.01289	0.003173	0.001046	0.017961	0.005626	0.000539	0.001081	0.013449	0.026153	0.009386	0.003783	0.003426	0.015062	0.01675	0.001954	0.001728	0.00662	0.011746	0.006344	0.013685	0.007179	0.025399	0.001355	0.024287	0.020658	0.039508	0.00452	0.005683	0.011427	0.026751	0.00206	0.012488	0.038356	0.008912	0.038926
Brucella melitensis ATCC 23457 uid59241	0.012651	0.016305	0.01434	0.030368	0.003609	0.018084	0.037016	0.025754	0.006248	0.003349	0.021741	0.019449	0.001577	0.002797	0.012902	0.003243	0.001047	0.017737	0.00577	0.000541	0.001319	0.013469	0.026004	0.009694	0.003892	0.00356	0.015026	0.016671	0.001924	0.001801	0.006614	0.011586	0.006442	0.013627	0.007234	0.025468	0.001508	0.024176	0.020646	0.03913	0.004544	0.005771	0.011361	0.026573	0.002275	0.012638	0.038129	0.009085	0.03895
Brucella melitensis biovar Abortus 2308 uid62937	0.012643	0.016333	0.014318	0.03044	0.00371	0.018142	0.037026	0.025545	0.006246	0.003331	0.021647	0.019476	0.001573	0.002782	0.012933	0.003249	0.001028	0.017673	0.005751	0.000541	0.001309	0.013433	0.025841	0.009635	0.003938	0.003556	0.015023	0.016838	0.001941	0.001762	0.006543	0.011536	0.006448	0.013661	0.007197	0.025571	0.001518	0.024239	0.020497	0.039194	0.004582	0.005769	0.011394	0.026526	0.002296	0.012666	0.038357	0.00911	0.039234
Brucella melitensis bv 1 16M uid57735	0.012609	0.01644	0.014434	0.030049	0.0037	0.017983	0.03694	0.025164	0.00639	0.003359	0.021665	0.01952	0.001691	0.002892	0.013015	0.003511	0.00101	0.017866	0.00583	0.000518	0.001345	0.01353	0.025971	0.009752	0.004073	0.003684	0.014942	0.016805	0.001884	0.001858	0.006899	0.011954	0.006627	0.013682	0.00732	0.025283	0.001559	0.02392	0.020462	0.038711	0.004735	0.005923	0.011384	0.026515	0.002503	0.012495	0.038146	0.009369	0.038445
Brucella melitensis M28 uid158857	0.012519	0.016352	0.014327	0.030231	0.003537	0.01807	0.037181	0.025597	0.006265	0.003207	0.021734	0.019506	0.001366	0.002759	0.012908	0.003246	0.001044	0.017869	0.00566	0.000555	0.001132	0.013415	0.026112	0.009486	0.003831	0.003416	0.015025	0.016719	0.001989	0.001721	0.006653	0.011736	0.006412	0.013628	0.00715	0.025508	0.001426	0.024254	0.020614	0.039423	0.004533	0.005681	0.011378	0.026682	0.002121	0.012504	0.038248	0.009009	0.038888
Brucella melitensis M5 90 uid158855	0.012343	0.016377	0.014345	0.030256	0.003441	0.018036	0.037283	0.02564	0.006303	0.003205	0.021765	0.01956	0.001315	0.002702	0.012886	0.003175	0.001062	0.017879	0.005646	0.000571	0.001102	0.013358	0.026148	0.009473	0.003802	0.003411	0.015011	0.016774	0.001978	0.001672	0.006551	0.011708	0.006343	0.013568	0.007098	0.025539	0.001423	0.024244	0.020693	0.039556	0.004461	0.005634	0.011347	0.026737	0.002063	0.012463	0.038256	0.008989	0.038932
Brucella melitensis NI uid158853	0.012408	0.016335	0.014408	0.0304	0.003514	0.018029	0.037262	0.025777	0.006157	0.003151	0.021796	0.019533	0.001352	0.002721	0.012888	0.003243	0.001023	0.017759	0.005676	0.000546	0.001056	0.013242	0.026193	0.009373	0.003734	0.003373	0.014898	0.016753	0.001897	0.001632	0.00649	0.011697	0.006337	0.013484	0.007132	0.025594	0.001379	0.024286	0.02073	0.039447	0.004405	0.005618	0.011319	0.026655	0.002015	0.012483	0.038243	0.009007	0.039034
Brucella microti CCM 4915 uid59319	0.012669	0.016544	0.014294	0.0301	0.003786	0.018108	0.036965	0.025442	0.006428	0.003382	0.021649	0.019443	0.001591	0.002815	0.012926	0.003282	0.001058	0.017912	0.005736	0.000542	0.001358	0.013674	0.026103	0.00973	0.003996	0.003598	0.015069	0.016714	0.001882	0.001813	0.006654	0.01178	0.006491	0.013602	0.00717	0.025303	0.001465	0.024131	0.020492	0.039083	0.004709	0.005814	0.011448	0.026569	0.002283	0.012476	0.037943	0.009247	0.038655
Brucella ovis ATCC 25840 uid58113	0.01259	0.016452	0.014183	0.030472	0.0037	0.017996	0.03697	0.025649	0.006251	0.003334	0.021603	0.019513	0.001523	0.002779	0.01283	0.003373	0.000997	0.017803	0.005654	0.00048	0.001246	0.013333	0.025841	0.009882	0.003892	0.003562	0.015122	0.016676	0.001923	0.001837	0.006812	0.011644	0.006388	0.013767	0.007225	0.025439	0.001434	0.024112	0.02048	0.039269	0.004744	0.005771	0.01145	0.026466	0.002311	0.012602	0.038325	0.009091	0.038826
Brucella pinnipedialis B2 94 uid71131	0.012741	0.016405	0.014261	0.030174	0.003836	0.018148	0.036857	0.025643	0.00645	0.003378	0.021545	0.019293	0.001635	0.002804	0.012872	0.003383	0.001048	0.017816	0.005777	0.000554	0.001435	0.013629	0.026087	0.009898	0.004044	0.003671	0.01504	0.01669	0.001948	0.00187	0.006808	0.01169	0.006612	0.013724	0.007172	0.025294	0.001567	0.024061	0.020409	0.039018	0.00484	0.005853	0.011492	0.026551	0.002453	0.012541	0.037907	0.009305	0.038664
Brucella suis 1330 uid159871	0.01276	0.016432	0.01435	0.030191	0.003805	0.018042	0.036958	0.025438	0.00638	0.00338	0.021574	0.01943	0.001602	0.002835	0.012942	0.003266	0.00109	0.017968	0.00573	0.000546	0.00139	0.013708	0.026095	0.009781	0.00399	0.003633	0.015078	0.016666	0.001939	0.001824	0.006682	0.011684	0.006554	0.013644	0.007227	0.025313	0.001512	0.024174	0.020447	0.039013	0.004659	0.005774	0.01143	0.026681	0.002324	0.012523	0.037967	0.009171	0.038749
Brucella suis 1330 uid57927	0.01273	0.016442	0.014352	0.030202	0.003803	0.018039	0.036971	0.025437	0.006373	0.003373	0.021568	0.019435	0.001599	0.002833	0.012948	0.003266	0.001089	0.017976	0.005723	0.000541	0.001383	0.013708	0.026123	0.009771	0.003986	0.003634	0.015081	0.016668	0.001946	0.001821	0.006664	0.01168	0.00655	0.013612	0.007201	0.025314	0.001511	0.02419	0.02045	0.039037	0.004654	0.005757	0.011428	0.026696	0.002312	0.012526	0.037983	0.009147	0.038755
Brucella suis ATCC 23445 uid59015	0.012885	0.016452	0.014341	0.029733	0.003863	0.018144	0.036906	0.025476	0.006484	0.003373	0.021457	0.019415	0.001645	0.002884	0.013123	0.003441	0.001049	0.017801	0.005743	0.000543	0.001438	0.01376	0.026222	0.009895	0.004072	0.003619	0.015029	0.016496	0.001928	0.001822	0.006721	0.011672	0.006688	0.013683	0.007367	0.025188	0.001545	0.024212	0.020486	0.038944	0.004828	0.005824	0.011459	0.026406	0.002509	0.012481	0.037903	0.009295	0.038615
Brucella suis VBI22 uid83617	0.012751	0.016409	0.01434	0.03021	0.003797	0.018039	0.036976	0.02545	0.006375	0.003379	0.021576	0.019427	0.001599	0.002823	0.012928	0.003269	0.00109	0.017958	0.005724	0.000546	0.00139	0.013712	0.026102	0.009784	0.003982	0.003628	0.015088	0.016671	0.001943	0.001828	0.006697	0.011674	0.00654	0.013654	0.007236	0.025308	0.001515	0.024171	0.020455	0.039035	0.004661	0.005771	0.01144	0.026688	0.002332	0.012524	0.037995	0.009179	0.038764
Buchnera aphidicola 5A Acyrthosiphon pisum uid59285	0.09057	0.061899	0.009832	0.007945	0.042669	0.063286	0.009517	0.021193	0.019534	0.020774	0.002877	0.002474	0.015668	0.014836	0.003192	0.001104	0.002279	0.031232	0.004846	0.000397	0.06371	0.04578	0.004291	0.010175	0.017963	0.031004	0.002931	0.002502	0.000337	0.009822	0.002154	0.009098	0.027763	0.01836	0.002703	0.004182	0.009218	0.012062	0.001648	0.001952	0.011475	0.014216	0.002083	0.002197	0.005939	0.012731	0.001816	0.00056	0.050223
Buchnera aphidicola Ak Acyrthosiphon kondoi uid158533	0.091854	0.063165	0.009111	0.007272	0.043995	0.064417	0.00879	0.021603	0.019643	0.021418	0.002096	0.002008	0.015648	0.014647	0.003032	0.000773	0.002395	0.03152	0.004137	0.000337	0.065652	0.045786	0.004213	0.009743	0.018098	0.031781	0.002112	0.002215	0.00031	0.010211	0.001742	0.009117	0.027732	0.018658	0.002047	0.003652	0.008513	0.012426	0.001415	0.001644	0.01198	0.014701	0.001584	0.001573	0.006058	0.012693	0.00166	0.000599	0.049764
Buchnera aphidicola APS Acyrthosiphon pisum uid57805	0.090521	0.061669	0.009894	0.007917	0.042667	0.063225	0.009485	0.021253	0.019492	0.020757	0.002935	0.002413	0.015662	0.014881	0.003172	0.001126	0.002284	0.031238	0.004842	0.000404	0.063769	0.045979	0.004309	0.01026	0.017978	0.030953	0.002984	0.002456	0.000345	0.009872	0.002154	0.009118	0.027791	0.018414	0.002688	0.004201	0.009248	0.012005	0.001697	0.001939	0.011434	0.014213	0.002106	0.002208	0.006005	0.012716	0.001799	0.000549	0.050062
Buchnera aphidicola Bp Baizongia pistaciae uid57827	0.085476	0.06268	0.013735	0.009781	0.045981	0.063736	0.007183	0.021758	0.019807	0.022358	0.002796	0.004098	0.014995	0.015697	0.003426	0.001932	0.002322	0.032144	0.005526	0.000342	0.067529	0.046083	0.004092	0.013177	0.019489	0.02867	0.00243	0.003954	0.00036	0.011797	0.002904	0.009007	0.027596	0.019021	0.00354	0.00381	0.010015	0.008119	0.001236	0.001266	0.012211	0.013363	0.001572	0.002004	0.007369	0.009331	0.002034	0.000888	0.040617
Buchnera aphidicola Cc Cinara cedri uid58579	0.129954	0.075278	0.00595	0.005539	0.051	0.078706	0.004368	0.018251	0.020115	0.018584	0.001111	0.000915	0.018106	0.012207	0.001009	0.000667	0.00271	0.040776	0.002325	0.000162	0.078825	0.055745	0.002436	0.004992	0.022406	0.031057	0.001479	0.001163	0.000145	0.011771	0.000975	0.008138	0.025047	0.016994	0.001017	0.001795	0.004924	0.006582	0.000359	0.000445	0.011686	0.012806	0.000701	0.001539	0.004744	0.007531	0.000402	0.000239	0.040691
Buchnera aphidicola Cinara tujafilina uid68101	0.100916	0.068192	0.007753	0.006948	0.046171	0.072302	0.008566	0.02094	0.020914	0.01753	0.003954	0.002942	0.012486	0.011742	0.002414	0.001237	0.002561	0.039093	0.003859	0.000346	0.077718	0.050021	0.002786	0.00674	0.019503	0.026841	0.002864	0.003072	0.000208	0.011647	0.002042	0.00848	0.028787	0.019382	0.00231	0.003548	0.006117	0.008108	0.000787	0.000857	0.011543	0.012633	0.001774	0.0036	0.007597	0.011084	0.001748	0.001367	0.038868
Buchnera aphidicola JF98 Acyrthosiphon pisum uid158845	0.092089	0.061921	0.00979	0.00786	0.043572	0.064188	0.009437	0.021757	0.019573	0.020755	0.002817	0.002324	0.015417	0.014957	0.003294	0.001199	0.002916	0.030611	0.004715	0.000542	0.063654	0.045543	0.004287	0.010538	0.018201	0.031121	0.002908	0.002513	0.00046	0.010135	0.002119	0.008961	0.027186	0.018727	0.002719	0.004049	0.009413	0.011852	0.001741	0.002029	0.011162	0.013987	0.002119	0.002078	0.005963	0.012755	0.001774	0.00055	0.048862
Buchnera aphidicola JF99 Acyrthosiphon pisum uid158847	0.090801	0.061497	0.009878	0.007822	0.042684	0.063284	0.009505	0.02152	0.019273	0.02078	0.002856	0.002434	0.015666	0.014756	0.003251	0.001107	0.002406	0.031376	0.004846	0.000444	0.064101	0.046631	0.004336	0.010196	0.017837	0.030724	0.002927	0.002538	0.000384	0.009949	0.002121	0.009209	0.027714	0.018368	0.002702	0.00421	0.009368	0.012059	0.00171	0.001924	0.011418	0.014131	0.002116	0.00222	0.005975	0.012651	0.00182	0.000537	0.049427
Buchnera aphidicola LL01 Acyrthosiphon pisum uid158843	0.088637	0.060778	0.009714	0.007902	0.041684	0.063407	0.00942	0.021849	0.019232	0.021078	0.002864	0.002369	0.015816	0.014953	0.003232	0.001104	0.002433	0.031154	0.004814	0.000477	0.064384	0.046228	0.00425	0.010318	0.017742	0.031074	0.002945	0.002519	0.000408	0.010116	0.002122	0.009024	0.027381	0.018455	0.002657	0.00429	0.009277	0.012003	0.00172	0.001938	0.011491	0.014297	0.002116	0.002197	0.006165	0.012992	0.001829	0.000529	0.04927
Buchnera aphidicola Sg Schizaphis graminum uid57913	0.097475	0.062414	0.010306	0.00852	0.043621	0.065414	0.007843	0.020657	0.019571	0.019969	0.0022	0.002172	0.015697	0.015014	0.002502	0.001204	0.002418	0.030622	0.00459	0.000308	0.066758	0.048799	0.00426	0.009304	0.018659	0.030762	0.001999	0.00225	0.00033	0.009953	0.002138	0.008918	0.027022	0.017158	0.002267	0.003096	0.008045	0.012254	0.001265	0.001584	0.011818	0.014432	0.001567	0.001668	0.005604	0.011874	0.001601	0.00047	0.051436
Buchnera aphidicola TLW03 Acyrthosiphon pisum uid158849	0.089533	0.061044	0.009788	0.007906	0.042522	0.063111	0.009342	0.021638	0.019327	0.020983	0.002919	0.002392	0.01591	0.014902	0.003156	0.001083	0.002438	0.031043	0.004853	0.000446	0.064044	0.046142	0.004263	0.010135	0.017919	0.030893	0.002925	0.002554	0.000434	0.009898	0.002149	0.009023	0.027649	0.018429	0.002682	0.004245	0.009359	0.012099	0.001674	0.001969	0.011462	0.014271	0.002183	0.002224	0.006093	0.012771	0.001848	0.00055	0.049229
Buchnera aphidicola Tuc7 Acyrthosiphon pisum uid59283	0.090439	0.061716	0.009877	0.007886	0.042701	0.063242	0.009532	0.021154	0.019486	0.020743	0.002882	0.002434	0.015701	0.014815	0.003188	0.001099	0.002286	0.031222	0.004829	0.000399	0.063778	0.045873	0.00426	0.010123	0.017916	0.031069	0.002948	0.002521	0.000334	0.009839	0.002166	0.009133	0.027765	0.018359	0.002707	0.004238	0.00927	0.012042	0.001706	0.001947	0.011468	0.014181	0.002116	0.002177	0.005994	0.012808	0.001816	0.000552	0.050232
Buchnera aphidicola Ua Uroleucon ambrosiae uid158535	0.091956	0.070614	0.007286	0.005157	0.043871	0.073152	0.007298	0.02149	0.020973	0.021081	0.00155	0.00188	0.014209	0.013794	0.002107	0.000415	0.002442	0.035409	0.002805	0.000261	0.073993	0.046739	0.002646	0.00652	0.018224	0.030145	0.001102	0.001925	0.000301	0.010546	0.001624	0.009274	0.033558	0.021569	0.001823	0.002663	0.006139	0.009706	0.001056	0.00117	0.012573	0.014078	0.000926	0.001346	0.005316	0.012613	0.001494	0.000403	0.047102
Burkholderia 383 uid58073	0.00406	0.004598	0.021887	0.02657	0.000593	0.004586	0.040515	0.022424	0.001811	0.001425	0.017533	0.033253	0.000512	0.001521	0.014742	0.000963	0.000744	0.006686	0.017376	0.00023	0.000378	0.003635	0.033049	0.005635	0.001301	0.000874	0.00648	0.027436	0.002111	0.000932	0.00796	0.013475	0.005094	0.00722	0.01636	0.029475	0.000836	0.00362	0.037244	0.053252	0.001447	0.001869	0.01006	0.039356	0.00249	0.008264	0.045858	0.012544	0.023539
Burkholderia ambifaria AMMD uid58303	0.003767	0.004386	0.022023	0.027092	0.000458	0.004207	0.040254	0.022288	0.001415	0.001142	0.017895	0.033049	0.000455	0.001356	0.014903	0.000868	0.000724	0.006824	0.017038	0.000258	0.000274	0.003097	0.032811	0.005362	0.001066	0.000722	0.006561	0.02707	0.002112	0.000864	0.007961	0.013341	0.004812	0.007276	0.016027	0.02974	0.000755	0.002883	0.037568	0.053968	0.001208	0.001568	0.010261	0.039906	0.002217	0.007394	0.047798	0.01303	0.022275
Burkholderia ambifaria MC40 6 uid58701	0.003578	0.004334	0.022093	0.027028	0.000483	0.004067	0.0409	0.022496	0.001352	0.00109	0.017772	0.033124	0.000372	0.00133	0.014938	0.000892	0.000712	0.006873	0.017169	0.000224	0.000248	0.003099	0.033211	0.00525	0.000876	0.000602	0.006413	0.027285	0.002142	0.000839	0.007895	0.013289	0.004656	0.007122	0.016046	0.029939	0.000632	0.002797	0.037964	0.054249	0.00113	0.001361	0.010193	0.040208	0.001956	0.007245	0.047597	0.012954	0.022384
Burkholderia CCGE1001 uid42975	0.008222	0.008448	0.020224	0.024418	0.001096	0.011746	0.033796	0.023139	0.003056	0.002641	0.0182	0.028669	0.001027	0.00278	0.016836	0.001821	0.000778	0.009896	0.014026	0.000441	0.0008	0.0087	0.027846	0.011019	0.00203	0.001582	0.008363	0.024614	0.001818	0.001474	0.007585	0.013247	0.009036	0.009643	0.013617	0.027113	0.001476	0.00699	0.035526	0.045752	0.002199	0.0034	0.011227	0.033688	0.00271	0.009188	0.043349	0.010975	0.028072
Burkholderia CCGE1002 uid42523	0.006685	0.007438	0.021054	0.026201	0.00084	0.007499	0.039279	0.023419	0.002354	0.002315	0.020584	0.027904	0.000821	0.002474	0.016827	0.001554	0.000788	0.008906	0.014829	0.000408	0.00061	0.006218	0.030737	0.009595	0.001709	0.001177	0.006269	0.026652	0.001904	0.001329	0.007516	0.013248	0.007943	0.009392	0.013809	0.028783	0.001868	0.004286	0.034279	0.051478	0.002406	0.002452	0.009743	0.036272	0.002653	0.009941	0.043439	0.010816	0.026997
Burkholderia CCGE1003 uid46253	0.007804	0.008164	0.020797	0.024135	0.001551	0.012719	0.032173	0.023091	0.003385	0.003148	0.019137	0.027681	0.001032	0.002956	0.017262	0.001875	0.00074	0.009399	0.014359	0.000461	0.000753	0.008516	0.027606	0.011577	0.002167	0.001809	0.008189	0.024647	0.001802	0.00151	0.007444	0.012933	0.00974	0.009508	0.013443	0.027426	0.001793	0.007941	0.032784	0.046815	0.002611	0.003868	0.011068	0.032768	0.00247	0.009791	0.042883	0.010582	0.027895
Burkholderia cenocepacia AU 1054 uid58371	0.004061	0.004395	0.021393	0.025856	0.000496	0.004361	0.039896	0.021867	0.001371	0.001221	0.018117	0.03304	0.000556	0.001432	0.014595	0.000946	0.000723	0.00667	0.017013	0.000232	0.000317	0.003401	0.03302	0.005778	0.001045	0.000741	0.006355	0.02686	0.002134	0.000908	0.008037	0.013478	0.005199	0.007548	0.016217	0.028772	0.000748	0.002846	0.037475	0.053966	0.00134	0.001605	0.010135	0.040178	0.002531	0.007616	0.047297	0.014232	0.022643
Burkholderia cenocepacia HI2424 uid58369	0.004091	0.004356	0.021927	0.027073	0.000468	0.004282	0.04034	0.022232	0.001333	0.001141	0.017911	0.033241	0.000506	0.001373	0.014502	0.000845	0.000754	0.006633	0.017385	0.000227	0.000291	0.003202	0.03344	0.005573	0.000987	0.000704	0.006264	0.027198	0.002125	0.000827	0.007892	0.013411	0.0051	0.007217	0.016183	0.029462	0.000738	0.002753	0.037843	0.054077	0.001203	0.001533	0.00998	0.040207	0.002195	0.007606	0.047163	0.013226	0.023176
Burkholderia cenocepacia J2315 uid57953	0.004253	0.004435	0.021533	0.027045	0.000488	0.004265	0.040317	0.022252	0.001384	0.001159	0.017985	0.032853	0.000493	0.001405	0.01443	0.00084	0.000723	0.006554	0.017562	0.000252	0.000331	0.003411	0.033078	0.005961	0.000962	0.000743	0.006334	0.026678	0.002152	0.00079	0.00789	0.013608	0.005217	0.007266	0.016151	0.029285	0.000791	0.002683	0.037314	0.054319	0.001296	0.001474	0.010103	0.039843	0.002268	0.007404	0.047279	0.013509	0.023038
Burkholderia cenocepacia MC0 3 uid58769	0.004052	0.004364	0.021865	0.027176	0.000476	0.004317	0.040553	0.022292	0.001321	0.001134	0.017794	0.033296	0.000417	0.001342	0.014488	0.000825	0.000737	0.006672	0.017497	0.000236	0.000301	0.003065	0.033332	0.005777	0.000876	0.000677	0.006209	0.027065	0.00212	0.000806	0.007728	0.013531	0.005073	0.007152	0.016016	0.029498	0.000753	0.002649	0.037789	0.054368	0.001191	0.001451	0.009917	0.039946	0.002097	0.007521	0.046966	0.013213	0.023209
Burkholderia cepacia GG4 uid173858	0.003509	0.004182	0.022084	0.027299	0.000425	0.004026	0.040815	0.022525	0.001299	0.001135	0.018242	0.032795	0.000392	0.001284	0.014811	0.000942	0.000753	0.006659	0.017384	0.00023	0.00023	0.003154	0.033599	0.005235	0.000976	0.000676	0.006321	0.02716	0.002117	0.000837	0.007973	0.013342	0.004576	0.006909	0.016381	0.030351	0.000619	0.002841	0.03773	0.054864	0.001192	0.001462	0.009873	0.04009	0.001923	0.007357	0.046969	0.012837	0.022257
Burkholderia gladioli BSR3 uid66301	0.003356	0.005283	0.020572	0.025409	0.000664	0.003346	0.041763	0.021477	0.001236	0.001172	0.02668	0.021502	0.000562	0.001435	0.018019	0.001725	0.000475	0.006449	0.017098	0.00023	0.000393	0.00288	0.032318	0.006023	0.001065	0.000863	0.007776	0.025994	0.002293	0.000685	0.007804	0.013188	0.005261	0.007875	0.014464	0.029758	0.000978	0.002604	0.027834	0.065659	0.001517	0.001972	0.01438	0.034466	0.002704	0.005961	0.05039	0.01254	0.015768
Burkholderia glumae BGR1 uid59397	0.003429	0.0043	0.021044	0.025715	0.000611	0.003838	0.040188	0.021512	0.001136	0.001278	0.023521	0.025403	0.000456	0.001265	0.016247	0.001529	0.000524	0.006567	0.017053	0.000269	0.000296	0.003234	0.031715	0.004719	0.000956	0.000771	0.006483	0.025994	0.002285	0.000702	0.008212	0.013351	0.004303	0.006938	0.015769	0.030127	0.000907	0.002724	0.035389	0.05819	0.00142	0.001632	0.012957	0.037675	0.002349	0.005339	0.051117	0.014564	0.015715
Burkholderia KJ006 uid165871	0.003488	0.003991	0.022028	0.027513	0.000459	0.003857	0.040719	0.02212	0.000983	0.001005	0.018276	0.031856	0.00041	0.000984	0.015059	0.000829	0.000731	0.006754	0.01721	0.000274	0.000237	0.003168	0.033289	0.005429	0.00076	0.000628	0.005911	0.027157	0.002261	0.000952	0.007904	0.013363	0.00474	0.007399	0.016117	0.029985	0.000526	0.002094	0.037289	0.054928	0.001056	0.001283	0.009655	0.040625	0.001996	0.006641	0.049829	0.012605	0.021169
Burkholderia mallei ATCC 23344 uid57725	0.00388	0.004757	0.020566	0.027427	0.000476	0.004404	0.03886	0.021194	0.001253	0.000796	0.013271	0.034362	0.000543	0.000984	0.015139	0.00156	0.000632	0.00737	0.016656	0.000323	0.000275	0.003881	0.032207	0.00602	0.001107	0.000707	0.006096	0.026325	0.002247	0.000644	0.009229	0.012792	0.005703	0.007548	0.015889	0.026762	0.000691	0.003265	0.044752	0.044282	0.000971	0.001358	0.012826	0.037757	0.003208	0.005517	0.05299	0.015906	0.017374
Burkholderia mallei NCTC 10229 uid58383	0.003857	0.004805	0.020566	0.027012	0.000463	0.004369	0.038686	0.021106	0.001198	0.000768	0.013203	0.03437	0.000521	0.000974	0.015077	0.001574	0.000645	0.007346	0.016586	0.000364	0.000248	0.003941	0.032327	0.005961	0.00104	0.000683	0.005986	0.026517	0.00233	0.000658	0.009131	0.012872	0.005693	0.007551	0.015802	0.026535	0.000668	0.003163	0.044711	0.044149	0.000914	0.001381	0.012829	0.038062	0.003062	0.00542	0.053297	0.016018	0.017202
Burkholderia mallei NCTC 10247 uid58385	0.003901	0.004825	0.020637	0.027381	0.000467	0.00442	0.038737	0.021217	0.001186	0.000762	0.013137	0.034345	0.000516	0.000978	0.015059	0.001566	0.000662	0.007383	0.016659	0.000365	0.000243	0.004012	0.03239	0.00599	0.001006	0.000662	0.005977	0.026315	0.002366	0.000652	0.009134	0.012825	0.005721	0.007548	0.015791	0.02665	0.00065	0.003173	0.044655	0.04422	0.000855	0.001337	0.012691	0.037889	0.002944	0.005477	0.053249	0.015914	0.01744
Burkholderia mallei SAVP1 uid58387	0.003925	0.004804	0.020421	0.026823	0.000506	0.004415	0.038605	0.021093	0.001232	0.000795	0.013175	0.034276	0.000549	0.001006	0.015031	0.001612	0.00066	0.00733	0.016502	0.000372	0.000276	0.004006	0.032251	0.006021	0.001084	0.00073	0.006038	0.026516	0.002371	0.00069	0.009245	0.0128	0.005733	0.007581	0.015841	0.026367	0.000676	0.003267	0.044428	0.043728	0.00098	0.001409	0.012823	0.037939	0.003352	0.005629	0.053606	0.01619	0.017313
Burkholderia multivorans ATCC 17616 uid58697	0.004149	0.004867	0.020894	0.027394	0.000519	0.004898	0.040148	0.022187	0.00133	0.001099	0.01587	0.034253	0.000501	0.001298	0.014624	0.00078	0.000745	0.008003	0.016243	0.000269	0.000379	0.004003	0.032147	0.004822	0.000822	0.000758	0.006137	0.026536	0.002104	0.000971	0.007851	0.013349	0.004439	0.008065	0.014936	0.029953	0.000788	0.002854	0.039605	0.052476	0.001006	0.0015	0.010252	0.040122	0.00239	0.007576	0.049165	0.012985	0.022631
Burkholderia multivorans ATCC 17616 uid58909	0.004001	0.004752	0.020983	0.02752	0.000459	0.004773	0.040413	0.02209	0.001222	0.001022	0.015829	0.034416	0.000419	0.001217	0.014558	0.000702	0.000743	0.007956	0.01632	0.000256	0.000321	0.003886	0.032315	0.004665	0.000682	0.000665	0.005994	0.026512	0.002123	0.000902	0.007763	0.013415	0.004265	0.007997	0.01492	0.030077	0.000739	0.002693	0.040011	0.053055	0.000871	0.001375	0.010195	0.040227	0.002075	0.007417	0.049153	0.012744	0.022632
Burkholderia phenoliruptrix BR3459a uid176370	0.007977	0.008444	0.019966	0.02442	0.001099	0.011704	0.034084	0.022913	0.00311	0.002667	0.018105	0.028572	0.000985	0.002848	0.01669	0.00184	0.000777	0.009914	0.014136	0.000421	0.000803	0.008634	0.028128	0.010915	0.001964	0.001547	0.008283	0.024696	0.001815	0.00158	0.007536	0.013313	0.008984	0.009681	0.013636	0.027242	0.001486	0.00695	0.035518	0.045672	0.002235	0.003402	0.011151	0.033658	0.002836	0.009332	0.043096	0.01119	0.028041
Burkholderia phymatum STM815 uid58699	0.006837	0.008032	0.021148	0.027283	0.001148	0.009045	0.037908	0.024029	0.003727	0.002363	0.012718	0.035336	0.000871	0.002579	0.014834	0.00183	0.000776	0.009784	0.014406	0.000363	0.000615	0.007078	0.029885	0.009612	0.002226	0.001668	0.007177	0.027262	0.001936	0.001674	0.007354	0.013252	0.008259	0.009971	0.01351	0.028181	0.001702	0.006075	0.032145	0.049699	0.00269	0.003859	0.013481	0.030068	0.002812	0.011024	0.04177	0.010124	0.030411
Burkholderia phytofirmans PsJN uid58729	0.009225	0.008904	0.020223	0.023958	0.001128	0.010568	0.035811	0.023333	0.003366	0.003191	0.020371	0.027715	0.001016	0.003296	0.016418	0.001676	0.000862	0.00985	0.014468	0.000428	0.000975	0.007913	0.029205	0.013913	0.002323	0.001571	0.007883	0.025521	0.001794	0.001661	0.007359	0.013271	0.010568	0.009963	0.013101	0.026389	0.001872	0.005869	0.030243	0.048528	0.002719	0.003359	0.009685	0.034409	0.002836	0.011586	0.03959	0.010569	0.030403
Burkholderia pseudomallei 1026b uid162511	0.004039	0.005193	0.020896	0.025804	0.000588	0.004736	0.038975	0.021302	0.001362	0.001013	0.013579	0.034966	0.000581	0.001163	0.015649	0.001546	0.00058	0.007571	0.016643	0.00036	0.00034	0.004076	0.031992	0.006084	0.000986	0.000711	0.006179	0.026889	0.002229	0.00069	0.008563	0.013283	0.006037	0.007386	0.015314	0.026714	0.000852	0.003274	0.045299	0.044296	0.001008	0.001452	0.012607	0.037573	0.002552	0.004729	0.050825	0.014996	0.017234
Burkholderia pseudomallei 1106a uid58515	0.004143	0.005177	0.020502	0.025054	0.000644	0.004727	0.038181	0.021127	0.001413	0.001037	0.013475	0.034286	0.000671	0.001182	0.015673	0.001669	0.000638	0.007345	0.016088	0.000415	0.000356	0.004348	0.031614	0.00627	0.001145	0.000757	0.006304	0.027131	0.002396	0.000833	0.00901	0.013001	0.006118	0.007723	0.015335	0.026009	0.000807	0.003468	0.044188	0.043304	0.001227	0.001564	0.012787	0.037957	0.003586	0.00549	0.05242	0.016215	0.01717
Burkholderia pseudomallei 1710b uid58391	0.003991	0.004953	0.017532	0.021351	0.001393	0.004737	0.033845	0.018541	0.001597	0.001329	0.01189	0.029711	0.000898	0.00128	0.014095	0.001942	0.000481	0.006167	0.013658	0.000339	0.000502	0.004101	0.028347	0.006112	0.001633	0.001253	0.006199	0.02378	0.001831	0.001037	0.008869	0.01102	0.006706	0.009741	0.018066	0.02703	0.001398	0.006686	0.040535	0.039081	0.003196	0.002636	0.012509	0.035159	0.01019	0.011149	0.060344	0.020803	0.018962
Burkholderia pseudomallei 668 uid58389	0.00413	0.005143	0.020347	0.02512	0.000655	0.004809	0.038333	0.021272	0.001468	0.000986	0.013294	0.034186	0.000697	0.001113	0.015496	0.001636	0.00065	0.007358	0.016208	0.000411	0.000387	0.00434	0.031825	0.006032	0.001202	0.000787	0.006278	0.027024	0.002391	0.000829	0.009068	0.012897	0.006047	0.007719	0.015342	0.025904	0.0008	0.00339	0.044603	0.043233	0.001146	0.001575	0.01287	0.038256	0.003444	0.005316	0.052526	0.016264	0.01708
Burkholderia pseudomallei BPC006 uid174460	0.004069	0.005067	0.020425	0.025113	0.000623	0.00466	0.038397	0.021069	0.001395	0.000956	0.01329	0.034375	0.000656	0.001103	0.015518	0.00164	0.000659	0.007291	0.016112	0.000436	0.000325	0.004219	0.031753	0.006097	0.001087	0.000704	0.006225	0.027173	0.002408	0.000776	0.008994	0.01293	0.006078	0.007715	0.015345	0.025974	0.000768	0.003333	0.044335	0.043232	0.001146	0.001514	0.012756	0.038229	0.003675	0.005416	0.052855	0.016236	0.017083
Burkholderia pseudomallei K96243 uid57733	0.004192	0.005183	0.020778	0.025905	0.000664	0.004851	0.038789	0.021318	0.00146	0.001098	0.013611	0.034497	0.000702	0.001234	0.015681	0.001626	0.000572	0.007642	0.016645	0.000322	0.000367	0.004134	0.032107	0.006342	0.00101	0.000772	0.006243	0.02671	0.00211	0.000706	0.008513	0.013211	0.006057	0.007432	0.015346	0.026698	0.000934	0.003517	0.04531	0.044416	0.001126	0.001495	0.012523	0.037307	0.002701	0.004794	0.050459	0.014906	0.017424
Burkholderia pseudomallei MSHR305 uid213227	0.003959	0.005092	0.020751	0.026079	0.00054	0.00467	0.039142	0.021248	0.001303	0.001018	0.013496	0.034824	0.000531	0.001155	0.015672	0.001503	0.000576	0.007559	0.016717	0.000337	0.0003	0.003981	0.031998	0.006053	0.000904	0.000646	0.006106	0.026737	0.002149	0.000636	0.008534	0.013264	0.006009	0.007389	0.015338	0.026852	0.000872	0.003268	0.04518	0.044391	0.001063	0.001428	0.012601	0.037643	0.002643	0.004916	0.050825	0.015198	0.017183
Burkholderia pseudomallei MSHR346 uid55259	0.004321	0.005368	0.020296	0.025029	0.000771	0.005058	0.038021	0.021189	0.001645	0.001183	0.013483	0.034161	0.000765	0.001306	0.015597	0.001749	0.000643	0.007411	0.016021	0.000453	0.000485	0.004626	0.031279	0.006599	0.001295	0.000895	0.006371	0.026948	0.002415	0.000854	0.008989	0.013003	0.006263	0.007834	0.015197	0.025966	0.000975	0.003661	0.043436	0.042967	0.00129	0.001692	0.012714	0.037852	0.003777	0.005631	0.052154	0.016183	0.017282
Burkholderia rhizoxinica HKI 454 uid60487	0.008669	0.010175	0.017389	0.023019	0.002592	0.011739	0.032049	0.02243	0.005876	0.004377	0.01664	0.025498	0.001599	0.004832	0.015318	0.002771	0.000918	0.011089	0.013077	0.000641	0.003592	0.011671	0.021715	0.021907	0.005081	0.002677	0.007833	0.020168	0.002045	0.002845	0.008899	0.013582	0.015048	0.011716	0.014019	0.026856	0.006206	0.00777	0.017489	0.044826	0.00755	0.004548	0.010042	0.030726	0.006412	0.012182	0.036788	0.017415	0.019547
Burkholderia RPE64 uid205541	0.007207	0.008401	0.020868	0.028396	0.00066	0.008943	0.03952	0.023686	0.002093	0.001813	0.016922	0.031864	0.000736	0.002267	0.015055	0.001122	0.000934	0.010181	0.013545	0.000342	0.000537	0.006583	0.031192	0.009437	0.001368	0.001081	0.00788	0.027471	0.002062	0.001324	0.007527	0.012721	0.00834	0.009694	0.013369	0.026905	0.000895	0.005384	0.039969	0.042669	0.001301	0.002142	0.011322	0.035349	0.002147	0.009495	0.046126	0.009065	0.030606
Burkholderia thailandensis E264 uid58081	0.00406	0.005124	0.020724	0.026547	0.000698	0.005084	0.039029	0.021273	0.001655	0.001292	0.013185	0.034433	0.000743	0.001325	0.015519	0.001636	0.000595	0.007257	0.016406	0.0003	0.000411	0.004259	0.031818	0.00689	0.001206	0.000947	0.006508	0.027109	0.002075	0.000848	0.008725	0.013143	0.006309	0.007557	0.015239	0.026402	0.000923	0.004168	0.043965	0.043204	0.001391	0.00207	0.012428	0.037475	0.00358	0.005753	0.050406	0.015162	0.017922
Burkholderia thailandensis MSMB121 uid201037	0.003975	0.005183	0.021015	0.026576	0.000663	0.004812	0.039585	0.021553	0.001646	0.001203	0.013472	0.034681	0.000623	0.001309	0.015621	0.001743	0.00059	0.007535	0.016646	0.000318	0.000354	0.00403	0.032208	0.006349	0.001041	0.000846	0.006412	0.026686	0.002202	0.000724	0.008498	0.013437	0.005997	0.007299	0.015432	0.02719	0.000898	0.003696	0.045231	0.04459	0.001403	0.001785	0.012398	0.036418	0.002552	0.004861	0.049325	0.014607	0.017843
Burkholderia vietnamiensis G4 uid58075	0.005052	0.004937	0.021736	0.027188	0.000731	0.005017	0.03908	0.022191	0.00171	0.001594	0.018528	0.030604	0.000716	0.001481	0.015664	0.001163	0.000686	0.006911	0.016654	0.000265	0.00056	0.004108	0.031744	0.00688	0.001426	0.001204	0.006541	0.02601	0.002162	0.001031	0.007829	0.013503	0.006173	0.007359	0.015764	0.029325	0.000934	0.003383	0.036347	0.05227	0.001782	0.001978	0.010358	0.038198	0.002938	0.007103	0.047902	0.012544	0.021603
Burkholderia xenovorans LB400 uid57823	0.009385	0.009011	0.020278	0.023035	0.001458	0.010668	0.034897	0.022942	0.003685	0.003132	0.020574	0.027014	0.00148	0.003457	0.016672	0.002702	0.000755	0.009977	0.014265	0.000445	0.001088	0.007973	0.028654	0.012218	0.002607	0.001905	0.008218	0.024372	0.001957	0.001842	0.007471	0.01356	0.009555	0.009795	0.013281	0.027742	0.001908	0.006171	0.029619	0.049839	0.002971	0.003574	0.010325	0.033984	0.003169	0.011135	0.039507	0.012081	0.029889
Burkholderia YI23 uid81081	0.007036	0.008138	0.020965	0.029541	0.000767	0.008557	0.040314	0.02414	0.001933	0.001671	0.016459	0.032248	0.000845	0.001938	0.01505	0.001452	0.000898	0.009575	0.01426	0.000308	0.000505	0.006418	0.031381	0.008874	0.00128	0.001051	0.008162	0.027254	0.001886	0.00112	0.007488	0.012761	0.008023	0.009688	0.013294	0.02686	0.000953	0.006043	0.041729	0.041411	0.001379	0.002342	0.011697	0.034131	0.002277	0.008269	0.046249	0.009191	0.03016
butyrate producing bacterium SM4 1 uid197180	0.025863	0.018464	0.017035	0.034079	0.007669	0.027367	0.029918	0.031234	0.016432	0.006681	0.015296	0.011499	0.015096	0.005073	0.017246	0.01343	0.001813	0.019654	0.016435	0.00117	0.007503	0.02526	0.016177	0.005388	0.006277	0.008887	0.017849	0.004226	0.001692	0.005323	0.010952	0.009939	0.002713	0.008236	0.007916	0.029806	0.001288	0.019008	0.013896	0.045231	0.004296	0.007307	0.008968	0.015916	0.002413	0.005138	0.009931	0.011213	0.029646
butyrate producing bacterium SS3 4 uid197159	0.030148	0.019889	0.021048	0.037094	0.005204	0.017016	0.046255	0.032315	0.018557	0.007073	0.015108	0.014626	0.011367	0.006648	0.013305	0.004718	0.001944	0.021619	0.0169	0.000638	0.012535	0.020342	0.020102	0.006584	0.00516	0.007409	0.019317	0.004721	0.00089	0.00573	0.008849	0.009188	0.003177	0.010107	0.007381	0.026174	0.00149	0.021521	0.017138	0.028282	0.00398	0.003779	0.003071	0.023937	0.002451	0.007986	0.009625	0.009678	0.032386
butyrate producing bacterium SSC 2 uid197181	0.056467	0.032191	0.012511	0.027308	0.010484	0.031533	0.038467	0.032453	0.033046	0.008386	0.004366	0.00837	0.017658	0.012708	0.007101	0.003024	0.002115	0.032441	0.009435	0.000772	0.03271	0.029727	0.011039	0.012308	0.012524	0.014462	0.006336	0.002533	0.000509	0.009689	0.004228	0.008042	0.009755	0.014743	0.00364	0.023245	0.004573	0.019153	0.002612	0.013434	0.018595	0.005767	0.000718	0.004915	0.004549	0.009361	0.002327	0.001544	0.056359
Butyrivibrio fibrisolvens uid197155	0.027954	0.03552	0.014853	0.04147	0.017941	0.039308	0.020109	0.030123	0.03003	0.01614	0.00692	0.002181	0.017514	0.009291	0.009738	0.003459	0.002145	0.028358	0.014383	0.000997	0.018511	0.026895	0.015066	0.01023	0.018634	0.016193	0.004782	0.002424	0.000472	0.007369	0.006409	0.008707	0.006039	0.009562	0.006486	0.022029	0.006116	0.037463	0.00429	0.006811	0.016285	0.012326	0.000605	0.00151	0.002789	0.009048	0.003075	0.000381	0.03812
Butyrivibrio proteoclasticus B316 uid51489	0.029607	0.031398	0.017149	0.038923	0.023062	0.031568	0.022642	0.029849	0.024023	0.016102	0.008635	0.003951	0.022849	0.010942	0.011039	0.008096	0.001543	0.031472	0.01367	0.000204	0.008753	0.02993	0.013439	0.008098	0.015958	0.014486	0.007058	0.002895	0.001018	0.006449	0.007063	0.009151	0.004006	0.010968	0.005285	0.023083	0.004293	0.040794	0.009158	0.012644	0.007633	0.014597	0.002948	0.005764	0.001651	0.004626	0.002839	0.00063	0.038243
Caldicellulosiruptor bescii DSM 6725 uid59201	0.060381	0.032054	0.018158	0.030818	0.039612	0.043408	0.010574	0.021219	0.025529	0.011204	0.005256	0.002897	0.023475	0.011977	0.009787	0.010285	0.001874	0.029699	0.012927	0.000502	0.022169	0.04182	0.008711	0.01867	0.017149	0.013242	0.002791	0.004072	0.000809	0.006861	0.004209	0.008832	0.014441	0.00862	0.005035	0.014172	0.006306	0.032769	0.00598	0.007917	0.013802	0.011449	0.002593	0.004369	0.002414	0.001982	0.001346	0.00078	0.048748
Caldicellulosiruptor hydrothermalis 108 uid60157	0.058483	0.029788	0.019118	0.031311	0.037569	0.04239	0.012651	0.021884	0.025078	0.01105	0.005883	0.002775	0.022841	0.010562	0.010495	0.009868	0.001805	0.027928	0.013638	0.000502	0.020171	0.040741	0.009942	0.018957	0.016647	0.014023	0.003341	0.004323	0.000803	0.006481	0.004742	0.008663	0.014319	0.008586	0.005415	0.015217	0.006324	0.033776	0.007106	0.008709	0.013635	0.011969	0.003028	0.004665	0.002469	0.002018	0.00175	0.000833	0.046665
Caldicellulosiruptor kristjanssonii 177R1B uid60393	0.058923	0.029456	0.019349	0.032524	0.037938	0.042146	0.011756	0.02114	0.024968	0.010379	0.005972	0.002941	0.023713	0.010906	0.011041	0.010601	0.001787	0.027933	0.013871	0.000474	0.020081	0.040743	0.009384	0.019273	0.016461	0.013167	0.003202	0.004418	0.00089	0.006609	0.004711	0.008044	0.013746	0.00814	0.00547	0.01541	0.006158	0.033564	0.006828	0.009071	0.01293	0.011053	0.003015	0.004867	0.00248	0.00198	0.001599	0.000946	0.048007
Caldicellulosiruptor kronotskyensis 2002 uid60491	0.059418	0.032507	0.017916	0.03009	0.03943	0.043695	0.010506	0.021472	0.02634	0.011567	0.005175	0.002838	0.023155	0.011822	0.009705	0.009565	0.001798	0.030125	0.012749	0.00046	0.022225	0.041708	0.00872	0.018397	0.017648	0.013337	0.002645	0.00418	0.000725	0.006912	0.00415	0.009245	0.014871	0.008713	0.004856	0.014125	0.006325	0.033134	0.005712	0.007387	0.014166	0.011554	0.002545	0.004417	0.00235	0.001994	0.00132	0.00072	0.048074
Caldicellulosiruptor lactoaceticus 6A uid60575	0.058881	0.029565	0.019006	0.033155	0.038113	0.042219	0.011616	0.021052	0.024801	0.010206	0.005925	0.002936	0.023184	0.010921	0.011054	0.011159	0.001815	0.027997	0.013644	0.000465	0.019709	0.040833	0.009428	0.019684	0.016414	0.013602	0.003216	0.004354	0.000863	0.006622	0.004782	0.008154	0.013514	0.008274	0.005505	0.015125	0.006194	0.033666	0.006717	0.008436	0.012993	0.011257	0.002927	0.00474	0.002348	0.002002	0.001577	0.000842	0.047282
Caldicellulosiruptor obsidiansis OB47 uid51501	0.059737	0.031503	0.018249	0.03107	0.039564	0.043528	0.010817	0.021551	0.025286	0.011141	0.005215	0.002917	0.023473	0.011595	0.009572	0.009976	0.001809	0.029301	0.012449	0.000453	0.020957	0.042317	0.008719	0.018659	0.017112	0.01368	0.002973	0.004178	0.000775	0.006934	0.004139	0.008314	0.014202	0.008678	0.004891	0.014798	0.005948	0.034347	0.006145	0.008033	0.0132	0.011685	0.002675	0.004701	0.002338	0.001897	0.001305	0.000779	0.048363
Caldicellulosiruptor owensensis OL uid60165	0.059654	0.031372	0.017753	0.030686	0.039364	0.043728	0.010711	0.021677	0.025276	0.011211	0.005281	0.002894	0.023713	0.011539	0.009342	0.009978	0.001797	0.029066	0.012343	0.000452	0.020637	0.041164	0.008488	0.018301	0.016663	0.013531	0.002892	0.004313	0.000812	0.006916	0.004196	0.008234	0.013996	0.008831	0.004781	0.014833	0.005582	0.034222	0.005875	0.008274	0.012882	0.011561	0.002741	0.004819	0.002309	0.00197	0.001389	0.000869	0.049222
Caldicellulosiruptor saccharolyticus DSM 8903 uid58289	0.059201	0.032063	0.017992	0.032004	0.038072	0.043813	0.011296	0.021295	0.026083	0.011494	0.005057	0.002885	0.023335	0.011805	0.009591	0.010267	0.001808	0.029159	0.013682	0.0005	0.023451	0.040937	0.00913	0.018684	0.017805	0.012926	0.002923	0.003572	0.000845	0.007163	0.004086	0.008583	0.015889	0.00896	0.004876	0.012635	0.007329	0.031872	0.005947	0.007202	0.014538	0.011612	0.002544	0.003662	0.002568	0.002079	0.00158	0.000808	0.046561
Caldilinea aerophila DSM 14535 NBRC 104270 uid158165	0.011062	0.009407	0.019379	0.012938	0.001665	0.016133	0.035521	0.021844	0.008232	0.004624	0.02099	0.020991	0.001799	0.003744	0.02	0.002565	0.000788	0.014261	0.014571	0.000573	0.003282	0.016669	0.020846	0.01913	0.003471	0.004502	0.007754	0.009794	0.001383	0.002772	0.005546	0.017624	0.011154	0.010626	0.010601	0.027393	0.002661	0.011639	0.022321	0.050749	0.00794	0.010267	0.014459	0.024697	0.006461	0.011203	0.03736	0.010678	0.026654
Caldisericum exile AZM16c01 uid158173	0.057823	0.033729	0.016443	0.026436	0.028507	0.050716	0.013647	0.019298	0.024379	0.01522	0.006489	0.006253	0.021431	0.011663	0.006035	0.008593	0.001728	0.025575	0.013159	0.00067	0.022689	0.041915	0.012956	0.012255	0.018758	0.014945	0.005026	0.005493	0.000873	0.003615	0.002288	0.006778	0.01463	0.008636	0.005684	0.00648	0.007908	0.043663	0.009151	0.002959	0.016201	0.013672	0.003733	0.003666	0.002686	0.003561	0.00149	0.000716	0.054799
Caldisphaera lagunensis DSM 15908 uid183486	0.060277	0.049141	0.012681	0.022922	0.061056	0.040861	0.006058	0.022208	0.022947	0.014156	0.003644	0.002727	0.024368	0.011863	0.011113	0.010386	0.00225	0.041757	0.006515	0.000419	0.054488	0.032815	0.008033	0.01541	0.022981	0.018254	0.003407	0.002358	0.00066	0.003851	0.002308	0.010053	0.016297	0.010672	0.001574	0.003241	0.012075	0.013536	0.002126	0.00161	0.019781	0.015331	0.002959	0.001511	0.000162	0.000473	0.000135	6.5e-05	0.053837
Calditerrivibrio nitroreducens DSM 19672 uid60821	0.063608	0.03928	0.014147	0.026139	0.044081	0.033365	0.019811	0.023268	0.018936	0.011363	0.010514	0.00502	0.020553	0.01183	0.006571	0.012139	0.001487	0.029208	0.013267	0.000703	0.023336	0.042627	0.011064	0.015194	0.014664	0.014725	0.009357	0.004297	0.000845	0.006295	0.002946	0.00656	0.00846	0.010875	0.003965	0.013755	0.00949	0.02886	0.007311	0.010742	0.011446	0.011449	0.004972	0.004269	0.001376	0.001957	0.000761	0.001059	0.043319
Caldivirga maquilingensis IC 167 uid58711	0.010028	0.028309	0.01792	0.039452	0.036323	0.036365	0.007786	0.025702	0.014119	0.015983	0.013539	0.006915	0.009109	0.020584	0.010334	0.042884	0.001736	0.01443	0.029376	0.00062	0.03824	0.009577	0.02322	0.008721	0.022073	0.003692	0.007713	0.002227	0.000899	0.002077	0.004419	0.013158	0.008378	0.007731	0.006783	0.010273	0.018898	0.021827	0.008711	0.010071	0.019453	0.011397	0.009157	0.005108	0.000453	0.002363	0.001086	0.000557	0.01757
Calothrix PCC 6303 uid183109	0.039999	0.034138	0.014788	0.013358	0.011883	0.042676	0.017573	0.018396	0.01886	0.019597	0.014056	0.004406	0.008284	0.017674	0.009597	0.00361	0.001573	0.019985	0.010461	0.000884	0.039251	0.030498	0.009533	0.02306	0.011665	0.014507	0.008836	0.005068	0.000565	0.006639	0.00327	0.01362	0.038486	0.011423	0.006032	0.014241	0.013505	0.011223	0.009371	0.009898	0.01512	0.012871	0.011757	0.004328	0.007352	0.013252	0.009451	0.006015	0.04807
Calothrix PCC 7507 uid182930	0.035165	0.028839	0.014817	0.013419	0.010907	0.039396	0.018165	0.017148	0.018434	0.020566	0.01263	0.005429	0.007859	0.015834	0.010362	0.003182	0.001609	0.02015	0.010423	0.000828	0.034406	0.029027	0.010233	0.023794	0.0108	0.01552	0.007102	0.004544	0.000763	0.006086	0.003309	0.014353	0.038339	0.011381	0.007085	0.017113	0.015406	0.009994	0.011546	0.015128	0.016002	0.0139	0.011549	0.005491	0.007367	0.011388	0.013074	0.007214	0.044851
Campylobacter coli 76339 uid217050	0.076714	0.051827	0.009247	0.015354	0.025331	0.039069	0.021508	0.021439	0.012506	0.017501	0.00737	0.002907	0.0161	0.020391	0.014933	0.002783	0.001962	0.030974	0.005647	0.000324	0.044787	0.053769	0.005436	0.01804	0.009411	0.015729	0.002327	0.002264	0.000866	0.007796	0.00423	0.006413	0.027903	0.012875	0.003596	0.003225	0.008392	0.031497	0.003805	0.001547	0.007554	0.016185	0.001802	0.001482	0.001245	0.005856	0.004737	0.000136	0.055405
Campylobacter coli CVM N29710 uid219322	0.077505	0.05269	0.008292	0.015348	0.02562	0.040846	0.019876	0.021592	0.012296	0.017317	0.007102	0.002821	0.015848	0.020599	0.014488	0.003031	0.002048	0.031652	0.005182	0.000305	0.047042	0.055134	0.00488	0.017535	0.009314	0.015634	0.002222	0.002109	0.000876	0.008038	0.004113	0.006607	0.028308	0.013003	0.003382	0.002956	0.007419	0.031878	0.003402	0.00134	0.007733	0.015784	0.002044	0.001286	0.001148	0.005729	0.004787	0.000139	0.055203
Campylobacter concisus 13826 uid58667	0.061731	0.034302	0.022166	0.02761	0.028273	0.017832	0.033385	0.022171	0.015246	0.013094	0.006453	0.008393	0.015306	0.011401	0.029094	0.006498	0.001963	0.020173	0.015132	0.00063	0.020877	0.048607	0.006443	0.010803	0.013809	0.008148	0.000929	0.005182	0.000771	0.00349	0.007553	0.006631	0.018091	0.005998	0.009044	0.007482	0.024056	0.031955	0.006304	0.003871	0.016735	0.007643	0.000811	0.003565	0.001634	0.003767	0.006372	0.000244	0.028683
Campylobacter curvus 525 92 uid58669	0.053984	0.027246	0.024571	0.027816	0.029296	0.013207	0.036739	0.024395	0.007506	0.008094	0.010368	0.017248	0.009637	0.007596	0.029924	0.007087	0.001615	0.018784	0.015875	0.000612	0.015825	0.041281	0.013594	0.013124	0.007755	0.006356	0.003924	0.009796	0.001164	0.002946	0.008327	0.007201	0.018299	0.007433	0.007996	0.010396	0.018853	0.024932	0.012653	0.012667	0.007031	0.00846	0.003616	0.010617	0.003533	0.004582	0.012497	0.001205	0.026101
Campylobacter fetus 82 40 uid58545	0.075045	0.04569	0.017307	0.012977	0.052206	0.024163	0.015198	0.022839	0.014107	0.01939	0.005238	0.005962	0.019925	0.020357	0.021115	0.00294	0.001826	0.027373	0.009242	0.00055	0.035732	0.048587	0.00614	0.012025	0.01215	0.013112	0.00197	0.003892	0.00084	0.005677	0.005352	0.006546	0.01953	0.010187	0.004332	0.005195	0.014216	0.028937	0.003469	0.003426	0.009386	0.010705	0.001155	0.006493	0.001491	0.003988	0.00291	0.000268	0.037485
Campylobacter hominis ATCC BAA 381 uid58981	0.088662	0.05292	0.016271	0.008885	0.035377	0.045325	0.014808	0.021355	0.019395	0.012196	0.004531	0.006933	0.015132	0.016061	0.016599	0.002041	0.002114	0.027614	0.007831	0.00045	0.033303	0.05238	0.010043	0.016105	0.014578	0.008821	0.002539	0.005027	0.000925	0.00572	0.006207	0.00623	0.020389	0.008703	0.004676	0.003494	0.005661	0.030403	0.002008	0.004989	0.006255	0.010348	0.000925	0.009001	0.002552	0.00507	0.005755	0.000386	0.052783
Campylobacter jejuni 00 2425 uid219359	0.082388	0.054121	0.008869	0.013164	0.02622	0.043549	0.016363	0.021866	0.012866	0.018724	0.006153	0.002539	0.016179	0.022698	0.012469	0.002669	0.002087	0.031546	0.005008	0.000323	0.050161	0.055231	0.004223	0.015331	0.009813	0.015867	0.001933	0.001498	0.000848	0.008502	0.003672	0.006523	0.028378	0.013107	0.003178	0.002807	0.006816	0.03181	0.002697	0.000994	0.008707	0.015413	0.00133	0.001093	0.00085	0.006234	0.003784	0.00011	0.057914
Campylobacter jejuni 00 2426 uid219324	0.081929	0.053877	0.008725	0.013093	0.026236	0.043626	0.016346	0.022093	0.012947	0.018628	0.006098	0.002564	0.016027	0.022688	0.01236	0.002648	0.002117	0.031531	0.005005	0.000351	0.049921	0.055481	0.004326	0.015647	0.009802	0.015902	0.001912	0.001528	0.000851	0.008461	0.003678	0.006591	0.028318	0.013089	0.003172	0.002812	0.006805	0.031898	0.002652	0.001002	0.008763	0.015505	0.001292	0.001115	0.000859	0.006342	0.003844	0.00012	0.057634
Campylobacter jejuni 00 2538 uid219325	0.082152	0.054075	0.008849	0.013193	0.026241	0.043551	0.016236	0.021995	0.012938	0.018695	0.006114	0.002545	0.016104	0.022789	0.012509	0.002668	0.002097	0.031523	0.005044	0.000344	0.049993	0.055201	0.004286	0.015485	0.009807	0.015804	0.001924	0.001517	0.00085	0.008444	0.003673	0.006604	0.028305	0.013078	0.003158	0.002799	0.006797	0.03183	0.002656	0.000988	0.008746	0.015433	0.001305	0.001101	0.000859	0.006251	0.003808	0.000117	0.057754
Campylobacter jejuni 00 2544 uid219326	0.082134	0.054143	0.008865	0.013209	0.026206	0.043586	0.016233	0.021993	0.012924	0.018653	0.006119	0.002543	0.016134	0.022764	0.012515	0.002679	0.002093	0.031606	0.005052	0.00034	0.049998	0.055288	0.004274	0.015472	0.009786	0.015807	0.001922	0.001512	0.000865	0.008458	0.003674	0.006628	0.028299	0.013076	0.003169	0.002789	0.006795	0.031833	0.002662	0.000988	0.008761	0.015424	0.001299	0.001105	0.000859	0.00625	0.003809	0.000113	0.057767
Campylobacter jejuni 32488 uid212977	0.082173	0.054041	0.00882	0.012943	0.026272	0.043723	0.016632	0.021735	0.01286	0.01881	0.006198	0.002553	0.015978	0.022627	0.012264	0.002584	0.002073	0.031618	0.005017	0.000331	0.049965	0.05558	0.004312	0.015461	0.009844	0.016131	0.001897	0.001485	0.000865	0.008489	0.003627	0.006498	0.028368	0.013247	0.00319	0.002824	0.006877	0.032098	0.00269	0.001005	0.008691	0.015543	0.00131	0.001099	0.00084	0.006308	0.003732	0.00011	0.057794
Campylobacter jejuni 81 176 uid58503	0.081344	0.053973	0.008728	0.012743	0.025983	0.043623	0.016519	0.022025	0.012955	0.018803	0.006256	0.002638	0.015886	0.022423	0.012421	0.002583	0.002148	0.031483	0.00504	0.000336	0.049893	0.055292	0.004438	0.015542	0.009931	0.01625	0.001907	0.001515	0.000785	0.008428	0.003651	0.006541	0.028423	0.013305	0.003208	0.002759	0.006829	0.031766	0.002666	0.000995	0.008888	0.015823	0.001218	0.001076	0.00086	0.00644	0.003823	0.000111	0.05708
Campylobacter jejuni 81116 uid58771	0.081674	0.053983	0.008672	0.012577	0.026185	0.043995	0.016295	0.021929	0.013107	0.01889	0.006098	0.002564	0.015912	0.022434	0.012166	0.002499	0.002077	0.031622	0.005054	0.000287	0.049993	0.055575	0.004371	0.015389	0.009958	0.016236	0.00195	0.001565	0.000816	0.008535	0.003559	0.006649	0.028528	0.013181	0.003205	0.002707	0.006741	0.031743	0.002583	0.000982	0.008887	0.01573	0.001236	0.001099	0.000837	0.006413	0.003788	0.000115	0.057077
Campylobacter jejuni doylei 269 97 uid58671	0.082203	0.053941	0.009231	0.013884	0.026086	0.043111	0.016891	0.021782	0.013069	0.018347	0.006438	0.002844	0.016339	0.021908	0.012701	0.002999	0.002183	0.031899	0.0052	0.000324	0.049354	0.054918	0.004866	0.015423	0.009641	0.015678	0.002103	0.001647	0.000894	0.008446	0.003834	0.006479	0.027991	0.013177	0.003357	0.002932	0.007061	0.03116	0.002928	0.001209	0.008224	0.015171	0.001657	0.00115	0.001	0.006108	0.003771	0.000159	0.057815
Campylobacter jejuni IA3902 uid159531	0.082044	0.053751	0.008808	0.013002	0.026304	0.043634	0.016453	0.021824	0.012868	0.018706	0.006271	0.002519	0.01596	0.022541	0.012125	0.00265	0.00204	0.031647	0.00497	0.000314	0.05012	0.055576	0.004368	0.015472	0.009872	0.016143	0.001947	0.001459	0.000833	0.008506	0.003637	0.006445	0.028332	0.013292	0.003149	0.002841	0.006881	0.031927	0.002691	0.001021	0.008709	0.015551	0.001325	0.001116	0.000837	0.006435	0.003829	0.000124	0.057771
Campylobacter jejuni ICDCCJ07001 uid61249	0.080793	0.053678	0.008514	0.012752	0.025653	0.043896	0.01647	0.022041	0.012978	0.018961	0.006274	0.00258	0.015959	0.022621	0.012522	0.002555	0.002042	0.031686	0.004913	0.000331	0.049537	0.054904	0.004474	0.015436	0.010058	0.016073	0.001928	0.001523	0.000785	0.0087	0.003565	0.006611	0.028361	0.013383	0.003221	0.002734	0.006658	0.031912	0.002679	0.001002	0.008869	0.015864	0.001278	0.00112	0.000821	0.006462	0.003793	0.000112	0.057039
Campylobacter jejuni M1 uid159535	0.081518	0.053661	0.008648	0.012577	0.026058	0.043907	0.016296	0.022036	0.013138	0.018892	0.006114	0.00254	0.015876	0.022515	0.012112	0.002514	0.002078	0.031572	0.005034	0.000305	0.049784	0.055478	0.004377	0.015539	0.009942	0.016239	0.001967	0.001565	0.00083	0.008527	0.003547	0.006699	0.028408	0.013211	0.003174	0.002736	0.006724	0.031847	0.002649	0.000979	0.008916	0.015821	0.001234	0.001074	0.00083	0.006439	0.003848	0.000125	0.057115
Campylobacter jejuni NCTC 11168 ATCC 700819 uid57587	0.081944	0.053682	0.008715	0.012892	0.026074	0.043734	0.016528	0.021976	0.012786	0.018782	0.006127	0.002522	0.016108	0.02243	0.012088	0.002614	0.002045	0.031697	0.004893	0.000298	0.049894	0.055454	0.004311	0.015693	0.00983	0.016067	0.001892	0.001522	0.000814	0.008561	0.003638	0.006431	0.028368	0.013333	0.003163	0.002831	0.006793	0.032081	0.002671	0.000973	0.008768	0.015639	0.001315	0.0011	0.000831	0.006471	0.003845	0.000121	0.057628
Campylobacter jejuni NCTC 11168 BN148 uid174152	0.08188	0.053848	0.008717	0.012941	0.026228	0.043787	0.016472	0.021936	0.012802	0.018814	0.006147	0.002499	0.016087	0.022482	0.012098	0.002638	0.002058	0.031716	0.004906	0.000326	0.049891	0.055543	0.004309	0.01575	0.009855	0.016097	0.001901	0.001524	0.00082	0.008559	0.003642	0.006435	0.028409	0.0133	0.003132	0.002824	0.006828	0.031989	0.00266	0.000988	0.008745	0.015585	0.001306	0.001096	0.000834	0.006419	0.003807	0.000123	0.057496
Campylobacter jejuni PT14 uid176499	0.08187	0.053913	0.008779	0.012929	0.026262	0.043633	0.016515	0.021844	0.012882	0.018951	0.006228	0.002527	0.015991	0.022617	0.012165	0.00262	0.002038	0.031463	0.004994	0.000321	0.049927	0.055357	0.004372	0.015533	0.009911	0.016212	0.001955	0.001511	0.000824	0.008547	0.003681	0.00642	0.028359	0.01329	0.003174	0.002772	0.006862	0.031918	0.002669	0.000978	0.008749	0.015494	0.001327	0.001107	0.000848	0.006442	0.00381	0.000115	0.057618
Campylobacter jejuni RM1221 uid57899	0.083429	0.054794	0.009044	0.01328	0.026762	0.04341	0.016188	0.021545	0.013189	0.018768	0.006027	0.002571	0.016242	0.022622	0.012573	0.00264	0.002194	0.031993	0.005152	0.000335	0.050569	0.055447	0.004343	0.015207	0.009693	0.015953	0.001939	0.001482	0.000875	0.008395	0.003628	0.006393	0.028647	0.012782	0.003172	0.002786	0.006954	0.031438	0.002721	0.000993	0.00857	0.015145	0.001376	0.001043	0.000877	0.006079	0.003663	0.000109	0.058307
Campylobacter jejuni S3 uid159533	0.082618	0.053929	0.008828	0.013183	0.026146	0.043431	0.016516	0.021664	0.01306	0.018776	0.006041	0.002635	0.015993	0.022853	0.012515	0.002563	0.002175	0.031256	0.00503	0.000343	0.050271	0.055718	0.004252	0.015366	0.009695	0.015976	0.001879	0.001497	0.000861	0.008506	0.003638	0.006402	0.028477	0.012834	0.003176	0.002759	0.006826	0.031949	0.002711	0.001019	0.008578	0.015257	0.001341	0.00106	0.000844	0.006306	0.003761	0.000117	0.057985
Campylobacter lari RM2100 uid58115	0.08479	0.054496	0.008651	0.011923	0.03084	0.042836	0.014219	0.022162	0.012238	0.019649	0.005606	0.002059	0.018642	0.022561	0.012038	0.002437	0.002072	0.033431	0.005098	0.000305	0.054568	0.055326	0.003852	0.014999	0.011027	0.014938	0.001412	0.001399	0.000782	0.008859	0.00365	0.006272	0.030512	0.013595	0.003179	0.002076	0.008149	0.025394	0.001908	0.000704	0.010601	0.013286	0.000851	0.000956	0.000517	0.003715	0.002738	6.9e-05	0.055137
Candidatus Accumulibacter phosphatis clade IIA UW 1 uid59207	0.005282	0.006822	0.018429	0.024185	0.001503	0.008097	0.036109	0.020625	0.003024	0.003269	0.023776	0.018993	0.001774	0.004864	0.01886	0.003935	0.000264	0.007076	0.015744	0.000647	0.00049	0.008177	0.027974	0.012074	0.002345	0.001775	0.008471	0.018706	0.002014	0.002374	0.008015	0.014237	0.007104	0.007806	0.014102	0.029309	0.00198	0.00758	0.032673	0.058782	0.004738	0.003546	0.013046	0.028976	0.005178	0.010338	0.038998	0.015462	0.023144
Candidatus Amoebophilus asiaticus 5a2 uid58963	0.054928	0.036182	0.014096	0.024763	0.035946	0.035484	0.010614	0.018986	0.020005	0.02021	0.009967	0.004577	0.014661	0.015688	0.011828	0.007158	0.001767	0.032125	0.009065	0.000694	0.042884	0.031654	0.007094	0.014365	0.009656	0.015929	0.00407	0.002504	0.000279	0.006408	0.003197	0.009835	0.035383	0.018834	0.005147	0.014462	0.01817	0.018994	0.005083	0.006404	0.010842	0.018503	0.00393	0.002114	0.004364	0.007885	0.003614	0.002371	0.046484
Candidatus Arthromitus SFB mouse Japan uid71379	0.061454	0.067786	0.009083	0.02599	0.05654	0.048435	0.005725	0.022117	0.019204	0.019238	0.002448	0.003701	0.022251	0.021262	0.004191	0.008017	0.00195	0.03895	0.005781	0.000815	0.04577	0.046348	0.005479	0.015468	0.019007	0.02201	0.002778	0.003377	0.00037	0.010161	0.001992	0.004918	0.015867	0.010916	0.001967	0.005061	0.006849	0.019078	0.002478	0.001421	0.010924	0.010106	0.000902	0.001715	0.001387	0.002751	0.000448	0.000336	0.046373
Candidatus Arthromitus SFB mouse Yit uid159517	0.06156	0.067987	0.008879	0.025747	0.056896	0.048802	0.005631	0.022212	0.019223	0.019219	0.002317	0.003761	0.022184	0.021285	0.004153	0.008032	0.001888	0.039007	0.005689	0.000807	0.045947	0.046356	0.005442	0.015377	0.01891	0.022137	0.002767	0.003364	0.000341	0.010218	0.001965	0.004825	0.015776	0.010996	0.001954	0.004968	0.006773	0.019097	0.002454	0.001336	0.011031	0.010106	0.000877	0.001703	0.001373	0.002748	0.000408	0.000317	0.046423
Candidatus Arthromitus SFB rat Yit uid73425	0.066445	0.067614	0.010393	0.023131	0.056919	0.048207	0.005638	0.022055	0.019983	0.018867	0.002076	0.004197	0.022017	0.019965	0.004675	0.006727	0.00197	0.038301	0.006033	0.000709	0.045064	0.046464	0.005867	0.015533	0.019901	0.021466	0.002719	0.003846	0.000307	0.009886	0.002156	0.004662	0.0164	0.010862	0.002052	0.004308	0.005822	0.020125	0.00243	0.001243	0.011046	0.010026	0.000876	0.00187	0.001332	0.002841	0.000342	0.000298	0.048443
Candidatus Azobacteroides pseudotrichonymphae genomovar CFP2 uid59163	0.062016	0.045722	0.010379	0.016887	0.032473	0.053126	0.012758	0.023164	0.018596	0.021035	0.005021	0.004715	0.013004	0.014516	0.0038	0.004314	0.001615	0.031668	0.008194	0.000488	0.034428	0.038765	0.009657	0.02603	0.011778	0.022135	0.006167	0.004897	0.000764	0.010587	0.003078	0.009082	0.026404	0.015511	0.003736	0.007324	0.009264	0.015579	0.003759	0.004647	0.01058	0.015193	0.003566	0.00329	0.007222	0.013794	0.003327	0.002363	0.052131
Candidatus Blochmannia chromaiodes 640 uid185308	0.058833	0.051811	0.010918	0.008252	0.039697	0.055977	0.011193	0.024892	0.018354	0.023745	0.005277	0.004241	0.011123	0.013375	0.005317	0.001909	0.002193	0.031544	0.00609	0.000394	0.060268	0.036881	0.005447	0.016574	0.015284	0.025888	0.00458	0.003528	0.000429	0.011696	0.003643	0.010744	0.030827	0.024	0.004291	0.005761	0.008367	0.010166	0.001914	0.003169	0.013719	0.014023	0.002706	0.003488	0.008232	0.018179	0.004844	0.001924	0.039931
Candidatus Blochmannia floridanus uid57999	0.061146	0.060788	0.007892	0.010325	0.043952	0.061315	0.008464	0.024708	0.017235	0.024319	0.003706	0.003235	0.012793	0.015605	0.002643	0.002632	0.002203	0.037711	0.004488	0.000296	0.068394	0.040614	0.003782	0.015804	0.016474	0.02873	0.003379	0.003256	0.00048	0.013657	0.002075	0.01034	0.032824	0.022806	0.002924	0.006057	0.006215	0.007079	0.001298	0.001518	0.012707	0.014915	0.001441	0.002648	0.008704	0.013417	0.001487	0.001661	0.037169
Candidatus Blochmannia pennsylvanicus BPEN uid58329	0.058626	0.051438	0.011131	0.008383	0.03969	0.055814	0.01131	0.024945	0.018359	0.02369	0.005371	0.004356	0.011091	0.013346	0.005366	0.001936	0.00217	0.031367	0.006237	0.000393	0.05997	0.036852	0.005471	0.016681	0.015322	0.025741	0.004595	0.003455	0.000453	0.011698	0.003738	0.010728	0.030759	0.02387	0.004306	0.005725	0.008512	0.010155	0.002001	0.003196	0.013685	0.013988	0.002778	0.003559	0.008164	0.01817	0.004978	0.001996	0.039879
Candidatus Blochmannia vafer BVAF uid62083	0.063998	0.060907	0.009164	0.01008	0.043035	0.061471	0.008413	0.02379	0.016304	0.024463	0.004101	0.003194	0.013844	0.015247	0.003117	0.002987	0.002128	0.035538	0.005064	0.000404	0.068922	0.041497	0.004018	0.015046	0.015967	0.028978	0.003251	0.003629	0.000466	0.013021	0.002635	0.010458	0.031939	0.021077	0.003329	0.005208	0.006736	0.008129	0.001388	0.001522	0.011841	0.015527	0.001822	0.002382	0.008615	0.012094	0.001517	0.001807	0.037774
Candidatus Carsonella ruddii CE isolate Thao2000 uid172732	0.150649	0.116883	0.005722	0.001367	0.077297	0.086163	0.001445	0.011893	0.012147	0.013456	0.00043	0.00043	0.015799	0.01039	0.000918	0.000254	0.002304	0.058764	0.002539	0.000234	0.091436	0.097764	0.001465	0.003359	0.018709	0.02533	0.000469	0.00041	0.001172	0.015018	0.000898	0.00457	0.012147	0.009218	0.000469	0.000352	0.001152	0.002519	3.9e-05	3.9e-05	0.006952	0.007616	9.8e-05	0.00041	3.9e-05	0.000293	0	0	0.031852
Candidatus Carsonella ruddii CS isolate Thao2000 uid172733	0.151454	0.11481	0.006341	0.001717	0.077171	0.083337	0.001912	0.011922	0.012468	0.013444	0.000449	0.000234	0.015727	0.010576	0.001229	0.000429	0.002361	0.055551	0.003298	0.000195	0.091493	0.100059	0.001756	0.00318	0.018302	0.026556	0.000527	0.00039	0.001151	0.014771	0.001073	0.004546	0.012273	0.00921	0.000702	0.000332	0.000995	0.00281	0	7.8e-05	0.006478	0.008	0.000117	0.00041	2e-05	0.000254	0	0	0.031688
Candidatus Carsonella ruddii DC uid213383	0.135135	0.100077	0.011902	0.006662	0.068477	0.076544	0.004898	0.014261	0.014819	0.013378	0.001567	0.001242	0.01752	0.012586	0.002791	0.0009	0.002305	0.051659	0.004772	0.000234	0.075409	0.087005	0.005222	0.010678	0.01851	0.028341	0.001783	0.002431	0.001188	0.014441	0.002557	0.004646	0.014693	0.010245	0.001332	0.000846	0.004249	0.005996	0.00054	0.000378	0.007509	0.007815	0.000522	0.000612	0.000738	0.000684	7.2e-05	7.2e-05	0.032897
Candidatus Carsonella ruddii HC isolate Thao2000 uid172734	0.148216	0.120729	0.006055	0.001708	0.074487	0.089256	0.001879	0.012168	0.012604	0.012472	0.000323	0.000304	0.015983	0.011826	0.000569	0.000323	0.00243	0.054935	0.002392	9.5e-05	0.089541	0.095919	0.001291	0.003037	0.019096	0.025361	0.000456	0.000437	0.00112	0.014655	0.000854	0.004537	0.013667	0.009795	0.00038	0.000209	0.001063	0.002468	3.8e-05	5.7e-05	0.007289	0.007992	0.000114	0.000285	3.8e-05	0.000266	0	0	0.032726
Candidatus Carsonella ruddii HT isolate Thao2000 uid172735	0.144691	0.119669	0.006479	0.002681	0.074884	0.084877	0.001828	0.01245	0.013161	0.013222	0.000345	0.000487	0.016594	0.012592	0.000914	0.000264	0.002437	0.055305	0.003514	0.000142	0.089467	0.092696	0.001665	0.003331	0.019762	0.023804	0.00065	0.000589	0.001056	0.014766	0.000995	0.004529	0.014441	0.009546	0.000467	0.000345	0.001808	0.002417	0	6.1e-05	0.007677	0.007515	0.000142	0.000345	4.1e-05	0.000244	0	0	0.033146
Candidatus Carsonella ruddii PC isolate NHV uid172736	0.143476	0.109126	0.011576	0.003594	0.066655	0.090005	0.002839	0.012469	0.016321	0.013065	0.000437	0.000834	0.015646	0.014514	0.001489	0.000338	0.002244	0.05214	0.00552	0.000159	0.08655	0.087265	0.002264	0.006691	0.021206	0.022218	0.000417	0.001847	0.001211	0.014435	0.001668	0.004646	0.014336	0.009193	0.000913	0.000417	0.002978	0.004388	7.9e-05	9.9e-05	0.008736	0.006314	9.9e-05	0.000635	0.000496	0.000973	7.9e-05	0	0.031372
Candidatus Carsonella ruddii uid58773	0.141104	0.104101	0.013232	0.006347	0.064485	0.086538	0.003632	0.012194	0.015907	0.013951	0.000619	0.001178	0.016306	0.014949	0.002475	0.000559	0.002215	0.049197	0.006327	0.000239	0.082666	0.086598	0.003014	0.007424	0.020537	0.022513	0.000818	0.001916	0.001178	0.01413	0.002136	0.00461	0.013991	0.008901	0.001597	0.000718	0.005149	0.005209	0.00022	0.000419	0.008362	0.006806	0.000299	0.000679	0.000718	0.000858	4e-05	2e-05	0.032073
Candidatus Chloracidobacterium thermophilum B uid73587	0.011886	0.007158	0.018847	0.016235	0.001644	0.019481	0.024835	0.017832	0.007182	0.00368	0.025491	0.024275	0.001138	0.005031	0.012505	0.002048	0.000538	0.00924	0.016558	0.000656	0.000855	0.019823	0.018335	0.010962	0.00484	0.002704	0.011574	0.010623	0.001573	0.003714	0.006251	0.013678	0.007244	0.00626	0.014627	0.03117	0.001062	0.012662	0.024936	0.058562	0.008116	0.004881	0.016314	0.030029	0.002585	0.011925	0.0328	0.029127	0.037632
Candidatus Cloacamonas acidaminovorans Evry uid62959	0.051436	0.043719	0.014499	0.016639	0.020741	0.04814	0.015217	0.021656	0.01415	0.020296	0.015321	0.00546	0.01137	0.014356	0.010932	0.004196	0.00151	0.035997	0.00927	0.000433	0.027346	0.034632	0.010748	0.021048	0.006393	0.01427	0.013527	0.003066	0.000842	0.006887	0.004384	0.011535	0.021677	0.012843	0.003878	0.015235	0.005871	0.020635	0.006129	0.019587	0.005419	0.018473	0.011368	0.0073	0.002329	0.009054	0.007805	0.003984	0.053908
Candidatus Desulforudis audaxviator MP104C uid59067	0.013769	0.005334	0.020304	0.023685	0.004335	0.012119	0.033485	0.019137	0.003278	0.004227	0.028397	0.012882	0.003531	0.00401	0.012458	0.00736	0.000959	0.006175	0.020594	0.001122	0.003213	0.013082	0.023283	0.016744	0.002454	0.002723	0.012856	0.008264	0.001154	0.002897	0.008671	0.011234	0.006735	0.004224	0.015542	0.023299	0.003299	0.010955	0.01836	0.057227	0.002548	0.003965	0.017052	0.026865	0.003136	0.007166	0.021659	0.038095	0.031299
Candidatus Hamiltonella defensa 5AT Acyrthosiphon pisum uid59289	0.057171	0.033836	0.013479	0.012572	0.015687	0.037611	0.020043	0.024821	0.014979	0.013371	0.01392	0.009372	0.008991	0.011786	0.01001	0.004018	0.002062	0.022858	0.007169	0.000535	0.037006	0.035086	0.008047	0.021128	0.013977	0.018548	0.006428	0.006033	0.001184	0.006999	0.003905	0.011936	0.030396	0.019347	0.00698	0.015507	0.006427	0.014899	0.010537	0.015877	0.008556	0.016265	0.008289	0.006079	0.007814	0.016373	0.008316	0.004949	0.043629
Candidatus Hodgkinia cicadicola Dsem uid59311	0.019288	0.003108	0.018305	0.031926	0.009507	0.007793	0.004868	0.014489	0.007839	0.007062	0.008524	0.018648	0.009347	0.002742	0.036245	0.016386	0.001371	0.005073	0.01378	0.002491	0.007153	0.021916	0.009347	0.021048	0.008044	0.007222	0.005165	0.017757	0.007747	0.009827	0.020773	0.008273	0.009004	0.003382	0.014969	0.013735	0.019402	0.020819	0.010352	0.040107	0.00745	0.007907	0.00857	0.010261	0.007404	0.006445	0.031171	0.007382	0.015906
Candidatus Kinetoplastibacterium blastocrithidii ex Strigomonas culicis uid183629	0.052232	0.052391	0.011168	0.016955	0.054526	0.039338	0.007797	0.023319	0.017874	0.018744	0.003781	0.002407	0.023218	0.015142	0.007529	0.006819	0.001701	0.026607	0.005937	0.000836	0.04281	0.035122	0.008018	0.017235	0.020523	0.032294	0.004642	0.003121	0.000451	0.009292	0.003614	0.00918	0.017611	0.016228	0.003	0.007784	0.016383	0.014269	0.002014	0.004065	0.014039	0.015263	0.001467	0.002102	0.003013	0.010245	0.003013	0.000568	0.038227
Candidatus Kinetoplastibacterium blastocrithidii TCC012E uid189752	0.052182	0.052178	0.011163	0.017085	0.054219	0.039378	0.00789	0.023657	0.017854	0.018809	0.003815	0.002438	0.023152	0.015283	0.007543	0.00689	0.001715	0.026748	0.005972	0.000835	0.04292	0.035423	0.008088	0.017362	0.020433	0.032191	0.004641	0.003199	0.000442	0.00934	0.003682	0.009154	0.01754	0.016288	0.003005	0.007786	0.016387	0.014444	0.002009	0.004129	0.013977	0.015242	0.001484	0.002112	0.003096	0.010394	0.003104	0.00057	0.037841
Candidatus Kinetoplastibacterium crithidii ex Angomonas deanei ATCC 30255 uid183630	0.059882	0.05478	0.010551	0.013869	0.050043	0.043369	0.00729	0.022181	0.019032	0.019645	0.003327	0.00194	0.022661	0.01528	0.00583	0.005337	0.001949	0.028131	0.004746	0.000708	0.047705	0.037858	0.006773	0.017915	0.019699	0.033129	0.003538	0.002305	0.000381	0.009169	0.002698	0.009384	0.022326	0.017531	0.002164	0.006248	0.013948	0.013389	0.001932	0.002805	0.014787	0.016157	0.000956	0.001187	0.002197	0.009744	0.001949	0.000496	0.045922
Candidatus Kinetoplastibacterium crithidii TCC036E uid189749	0.059923	0.054674	0.010617	0.013865	0.049979	0.043568	0.007332	0.022302	0.01907	0.019616	0.003375	0.001973	0.022599	0.015332	0.005808	0.005306	0.001875	0.028289	0.004797	0.000705	0.047717	0.038205	0.006827	0.01792	0.019718	0.033069	0.003542	0.002356	0.000387	0.009305	0.002722	0.009419	0.022273	0.017513	0.002233	0.006207	0.013963	0.013564	0.00194	0.002841	0.014693	0.016078	0.000937	0.001194	0.002217	0.009749	0.001997	0.000501	0.045691
Candidatus Kinetoplastibacterium desouzaii TCC079E uid189750	0.060636	0.057073	0.010999	0.013622	0.051032	0.044492	0.006086	0.022122	0.019197	0.020141	0.003262	0.001526	0.02403	0.01559	0.004616	0.003953	0.001852	0.028484	0.004857	0.000719	0.051325	0.038029	0.0067	0.016803	0.019555	0.034634	0.003246	0.002057	0.00041	0.009384	0.002318	0.009331	0.022077	0.017004	0.002458	0.005668	0.012541	0.014537	0.001615	0.002133	0.01379	0.017036	0.001085	0.001024	0.00227	0.010018	0.001844	0.000297	0.044817
Candidatus Kinetoplastibacterium galatii TCC219 uid189751	0.054107	0.052806	0.01134	0.015897	0.053438	0.038194	0.008191	0.02337	0.018018	0.018793	0.004577	0.002305	0.023541	0.015778	0.006992	0.005866	0.001742	0.025813	0.006849	0.000779	0.043917	0.034718	0.00866	0.016309	0.020466	0.032234	0.00474	0.003145	0.000445	0.00937	0.003565	0.009239	0.018328	0.015856	0.003288	0.007461	0.015954	0.014746	0.001983	0.00434	0.014371	0.015089	0.00122	0.00217	0.002737	0.010794	0.002937	0.000469	0.039793
Candidatus Kinetoplastibacterium oncopeltii TCC290E uid189840	0.05823	0.054293	0.010811	0.014075	0.055016	0.039758	0.007759	0.023277	0.017915	0.019877	0.003409	0.001958	0.022741	0.014948	0.006665	0.005452	0.001758	0.026244	0.006389	0.000762	0.046329	0.035676	0.008244	0.016599	0.021043	0.03245	0.004133	0.002962	0.000434	0.009547	0.003133	0.009117	0.018889	0.016101	0.003013	0.006814	0.01405	0.014599	0.001941	0.00369	0.014314	0.015118	0.001158	0.001805	0.002558	0.010943	0.002643	0.000434	0.042243
Candidatus Korarchaeum cryptofilum OPF8 uid58601	0.014255	0.01492	0.013204	0.041209	0.053287	0.009113	0.019313	0.025544	0.006965	0.013261	0.00719	0.009875	0.016991	0.006466	0.018319	0.049393	0.000879	0.014081	0.02045	0.000648	0.012894	0.004821	0.033443	0.015342	0.01109	0.009854	0.017773	0.009522	0.001836	0.001668	0.006753	0.01132	0.00458	0.007106	0.006527	0.010691	0.014864	0.009248	0.034473	0.022192	0.008381	0.011381	0.014432	0.010529	0.000631	0.000812	0.001179	0.000707	0.019953
Candidatus Koribacter versatilis Ellin345 uid58479	0.014254	0.011094	0.024211	0.03036	0.001964	0.015324	0.034627	0.022736	0.00547	0.006834	0.024128	0.022114	0.001754	0.004939	0.017065	0.002224	0.000939	0.009963	0.018026	0.001108	0.002372	0.010237	0.030166	0.014218	0.004262	0.004444	0.011757	0.019846	0.00079	0.002051	0.006956	0.013545	0.011066	0.007796	0.014564	0.026176	0.003205	0.011051	0.030822	0.031828	0.006195	0.005681	0.012677	0.02546	0.005708	0.008816	0.030897	0.010161	0.028743
Candidatus Liberibacter asiaticus gxpsy uid193764	0.046968	0.036092	0.009443	0.018141	0.026616	0.04482	0.016152	0.025972	0.016339	0.015888	0.006886	0.00769	0.01127	0.012699	0.00571	0.004326	0.001778	0.024398	0.005984	0.000695	0.030331	0.035963	0.009395	0.019928	0.01401	0.032494	0.007987	0.00738	0.000957	0.010382	0.00336	0.010172	0.026222	0.018442	0.004853	0.009621	0.009248	0.022392	0.008162	0.005527	0.010728	0.018141	0.004639	0.003661	0.007542	0.018761	0.007238	0.003463	0.04321
Candidatus Liberibacter asiaticus psy62 uid59227	0.046646	0.036697	0.009244	0.017611	0.026652	0.045431	0.016281	0.026304	0.016334	0.015852	0.006758	0.007557	0.011056	0.012662	0.005663	0.004198	0.001775	0.024492	0.005888	0.000714	0.030195	0.035855	0.009438	0.020094	0.013999	0.033069	0.008076	0.007353	0.000983	0.010471	0.003406	0.01002	0.025944	0.018532	0.004899	0.009557	0.009303	0.02242	0.008167	0.005503	0.010822	0.018031	0.004608	0.0036	0.007435	0.018945	0.007331	0.003431	0.043046
Candidatus Liberibacter solanacearum CLso ZC1 uid61245	0.051647	0.038394	0.00945	0.017316	0.028133	0.047165	0.014089	0.024905	0.016445	0.015621	0.006536	0.007031	0.01111	0.012135	0.005647	0.00415	0.00195	0.025563	0.005442	0.000753	0.031384	0.038083	0.007828	0.019664	0.014797	0.034402	0.007481	0.006483	0.000827	0.009885	0.003103	0.009968	0.025607	0.01806	0.003933	0.008937	0.008881	0.024327	0.006767	0.004559	0.011021	0.017811	0.004452	0.003578	0.006604	0.019264	0.0065	0.002988	0.044835
Candidatus Methylomirabilis oxyfera uid161981	0.010659	0.010097	0.013994	0.02633	0.003861	0.014732	0.03756	0.02175	0.007461	0.00535	0.022872	0.019063	0.004926	0.006049	0.013146	0.007887	0.001024	0.011784	0.013608	0.000959	0.003744	0.014808	0.021285	0.013869	0.005569	0.004983	0.010945	0.014355	0.001705	0.003903	0.00682	0.012336	0.009286	0.010222	0.012263	0.026267	0.003574	0.015519	0.028352	0.043344	0.005983	0.007905	0.012346	0.023459	0.012515	0.009367	0.01944	0.022277	0.020078
Candidatus Midichloria mitochondrii IricVA uid68687	0.053584	0.039987	0.013967	0.022223	0.035425	0.040572	0.014651	0.023887	0.012987	0.021487	0.009522	0.004417	0.018786	0.013808	0.011997	0.009123	0.002168	0.025865	0.008006	0.001051	0.039811	0.036772	0.010051	0.015804	0.014119	0.019971	0.005563	0.004816	0.001051	0.00649	0.004773	0.008277	0.023203	0.013287	0.005376	0.009631	0.0139	0.01898	0.005743	0.00704	0.012293	0.012871	0.003638	0.004382	0.003257	0.004452	0.003264	0.002133	0.042406
Candidatus Moranella endobia PCIT uid68739	0.035803	0.026743	0.01827	0.01472	0.017713	0.034689	0.020049	0.027445	0.011438	0.017952	0.017966	0.007367	0.00394	0.011156	0.01266	0.002639	0.001685	0.020215	0.010426	0.000542	0.020323	0.022695	0.012197	0.0196	0.00937	0.010426	0.006558	0.006601	0.000709	0.006384	0.006442	0.010527	0.02028	0.016773	0.007975	0.024003	0.022348	0.014923	0.004772	0.024249	0.014098	0.008958	0.003976	0.010888	0.005654	0.021711	0.019289	0.005856	0.039678
Candidatus Moranella endobia PCVAL uid197215	0.035707	0.026699	0.018333	0.014655	0.017626	0.034748	0.020057	0.027356	0.011381	0.017893	0.018038	0.0074	0.003981	0.011114	0.012643	0.002683	0.001688	0.02023	0.010414	0.000555	0.020324	0.022747	0.012253	0.019617	0.009354	0.010465	0.006563	0.006585	0.000721	0.006412	0.006462	0.010595	0.020252	0.016804	0.007955	0.023944	0.022314	0.014929	0.004753	0.024262	0.014085	0.008979	0.004003	0.010919	0.005662	0.021672	0.019307	0.0059	0.039595
Candidatus Mycoplasma haemolamae Purdue uid171259	0.036378	0.025168	0.017665	0.053249	0.019946	0.021063	0.017277	0.012711	0.015532	0.023815	0.011672	0.00277	0.023316	0.014913	0.010952	0.011132	0.001971	0.019069	0.015855	0.002299	0.026234	0.030048	0.016575	0.014516	0.015735	0.036678	0.009945	0.004215	0.011109	0.009839	0.00513	0.003338	0.024314	0.006298	0.008435	0.01435	0.023963	0.019544	0.010158	0.008532	0.004612	0.022744	0.005203	0.001399	0.00326	0.00151	0.000808	0.000568	0.047293
Candidatus Mycoplasma haemominutum Birmingham 1 uid197195	0.057903	0.041732	0.010453	0.03063	0.022752	0.036045	0.008797	0.013766	0.014943	0.02648	0.008136	0.002443	0.023293	0.020756	0.008898	0.010202	0.001858	0.025428	0.009798	0.001587	0.039647	0.038256	0.01194	0.016543	0.01847	0.030504	0.011511	0.004018	0.012966	0.007147	0.004528	0.00381	0.023205	0.009641	0.005995	0.015938	0.019087	0.017311	0.009219	0.00796	0.007513	0.013785	0.006612	0.002469	0.004251	0.002273	0.001366	0.001455	0.048174
Candidatus Nasuia deltocephalinicola NAS ALF uid214084	0.136427	0.106236	0.010627	0.009578	0.086177	0.058431	0.002911	0.013014	0.013043	0.008268	0.001572	0.000641	0.01904	0.012927	0.002446	0.003173	0.006172	0.054385	0.006638	0.001135	0.081315	0.094125	0.005561	0.007308	0.018837	0.02364	0.00294	0.001339	0.004454	0.010539	0.00294	0.000932	0.010801	0.008094	0.001572	0.001922	0.006085	0.007686	0.000844	0.000873	0.00524	0.008006	0.001368	0.000699	0.000233	0.000408	0.000146	2.9e-05	0.028852
Candidatus Nitrosopumilus AR2 uid176130	0.070928	0.035858	0.013198	0.015134	0.020388	0.05268	0.016345	0.025336	0.026585	0.021205	0.005604	0.002468	0.021698	0.012126	0.004353	0.003045	0.002093	0.021884	0.009045	0.001033	0.028208	0.034028	0.010127	0.01749	0.025874	0.022365	0.004806	0.002195	0.000897	0.007966	0.002505	0.008945	0.025318	0.013231	0.004388	0.006236	0.013628	0.017335	0.004408	0.004496	0.019277	0.014182	0.002464	0.001665	0.004072	0.004145	0.000942	0.000367	0.055431
Candidatus Nitrosopumilus koreensis AR1 uid176129	0.069232	0.033359	0.015843	0.016347	0.020082	0.050283	0.016228	0.02449	0.027194	0.02078	0.006004	0.002345	0.021459	0.011936	0.004336	0.003112	0.001989	0.021091	0.00966	0.001049	0.025495	0.034427	0.009791	0.017807	0.02593	0.023133	0.004708	0.002194	0.000958	0.007782	0.002505	0.009093	0.026013	0.012653	0.005159	0.006201	0.013547	0.01771	0.004478	0.005364	0.019907	0.013879	0.00244	0.001488	0.003932	0.004429	0.001101	0.000381	0.055503
Candidatus Nitrososphaera gargensis Ga9 2 uid176707	0.022758	0.014083	0.025373	0.04349	0.027911	0.017713	0.026483	0.027101	0.017144	0.010976	0.013041	0.011794	0.012277	0.005169	0.019419	0.020567	0.001486	0.013768	0.019184	0.00166	0.004151	0.022657	0.015976	0.01237	0.013202	0.010998	0.006777	0.012601	0.001481	0.002426	0.007866	0.009836	0.010857	0.008024	0.011256	0.022195	0.009064	0.02207	0.014298	0.025826	0.012321	0.008564	0.006249	0.012179	0.002856	0.002627	0.010163	0.005697	0.032393
Candidatus Nitrospira defluvii uid51175	0.014235	0.01172	0.0141	0.023504	0.00179	0.015504	0.03196	0.022955	0.006168	0.004534	0.024334	0.022363	0.002945	0.006227	0.013047	0.003884	0.000945	0.013358	0.011637	0.000984	0.003315	0.013884	0.021626	0.021595	0.005012	0.004389	0.013538	0.01546	0.001375	0.003885	0.006333	0.013331	0.013253	0.012323	0.011458	0.028049	0.002669	0.009268	0.029785	0.039651	0.00462	0.00674	0.014558	0.026095	0.009966	0.010713	0.022186	0.021375	0.029893
Candidatus Pelagibacter IMCC9063 uid66305	0.085558	0.047486	0.014198	0.018104	0.025315	0.057242	0.010799	0.021105	0.016997	0.020383	0.007455	0.003993	0.02148	0.0131	0.007914	0.003652	0.002508	0.023712	0.009559	0.000607	0.043182	0.049079	0.00656	0.015884	0.01619	0.02605	0.006284	0.003359	0.000454	0.006481	0.003606	0.008873	0.021996	0.011251	0.005167	0.006826	0.012232	0.017492	0.002742	0.00404	0.012942	0.012942	0.003882	0.002054	0.002925	0.002449	0.000695	0.000429	0.043722
Candidatus Pelagibacter ubique HTCC1062 uid58401	0.088164	0.051907	0.013163	0.013924	0.029691	0.056191	0.009117	0.021929	0.022295	0.021366	0.004525	0.002788	0.024987	0.015089	0.005132	0.002313	0.002444	0.02614	0.007227	0.000451	0.052878	0.046193	0.005793	0.0087	0.023455	0.020848	0.002461	0.002041	0.000337	0.007525	0.001991	0.009022	0.022228	0.011504	0.004091	0.00401	0.010812	0.017824	0.001575	0.00196	0.016046	0.012347	0.002327	0.001105	0.001597	0.001855	0.000136	0.000165	0.047955
Candidatus Phytoplasma australiense uid61641	0.103515	0.049023	0.023459	0.008328	0.017289	0.05834	0.016678	0.017129	0.016869	0.02558	0.008642	0.002296	0.013202	0.011544	0.005368	0.001903	0.002966	0.029305	0.008419	0.00025	0.06433	0.048412	0.009242	0.017289	0.011661	0.019335	0.005586	0.002344	0.00042	0.006128	0.002695	0.006325	0.050788	0.013553	0.00506	0.002046	0.005921	0.015184	0.002902	0.001212	0.009439	0.017076	0.004395	0.001669	0.002684	0.007079	0.004273	0.000409	0.058069
Candidatus Phytoplasma mali uid59087	0.11189	0.073666	0.008617	0.00624	0.030151	0.079709	0.005736	0.016906	0.014876	0.025581	0.003333	0.001591	0.013174	0.014745	0.001912	0.001113	0.002645	0.038336	0.002927	0.000229	0.084915	0.061619	0.004092	0.011046	0.01358	0.023551	0.002121	0.002508	0.000262	0.007458	0.000923	0.005002	0.037543	0.013894	0.001971	0.001565	0.003058	0.006947	0.000367	0.000557	0.008878	0.01409	0.001591	0.001689	0.002364	0.006999	0.000832	0.000229	0.05786
Candidatus Portiera aleyrodidarum BT B uid173859	0.094153	0.056658	0.015382	0.015134	0.065124	0.049221	0.006557	0.019522	0.025274	0.018853	0.002777	0.003942	0.019646	0.015767	0.002578	0.003235	0.002194	0.038995	0.004214	0.000508	0.067591	0.043519	0.002467	0.013511	0.018456	0.018084	0.001326	0.002504	0.000471	0.013585	0.001512	0.00802	0.024047	0.015221	0.002987	0.002826	0.007387	0.010226	0.000855	0.001351	0.011168	0.012742	0.001376	0.001785	0.002938	0.010697	0.001649	0.001971	0.04104
Candidatus Portiera aleyrodidarum BT B uid176373	0.094091	0.056843	0.015301	0.01511	0.065409	0.049384	0.006468	0.019698	0.025149	0.018846	0.002707	0.004054	0.019812	0.01572	0.002605	0.003266	0.002338	0.039014	0.00394	0.000597	0.067696	0.043779	0.002389	0.01356	0.018376	0.017918	0.001169	0.002491	0.000534	0.013839	0.001576	0.007841	0.02384	0.015046	0.002872	0.002847	0.00718	0.010116	0.00075	0.001322	0.011069	0.012619	0.001334	0.00169	0.002872	0.010726	0.001665	0.001982	0.040831
Candidatus Portiera aleyrodidarum BT QVLC uid175570	0.094034	0.056824	0.015461	0.015114	0.065355	0.049249	0.006571	0.019404	0.025306	0.018809	0.002815	0.003906	0.019615	0.015747	0.002517	0.003174	0.00212	0.039119	0.00429	0.000459	0.067661	0.043867	0.002529	0.013515	0.018487	0.01804	0.001351	0.002505	0.000471	0.013589	0.001537	0.007948	0.024153	0.01535	0.002976	0.002815	0.007415	0.010291	0.000843	0.001376	0.011122	0.012734	0.001376	0.001773	0.002889	0.0107	0.001649	0.001984	0.040979
Candidatus Portiera aleyrodidarum BT QVLC uid176374	0.094223	0.056399	0.015155	0.015267	0.065062	0.049196	0.006441	0.019611	0.025041	0.018825	0.002671	0.003957	0.019848	0.015791	0.002559	0.003321	0.002347	0.03896	0.003982	0.000612	0.067584	0.043616	0.002372	0.013806	0.018288	0.018063	0.001248	0.002509	0.000537	0.014243	0.001585	0.008289	0.023855	0.015204	0.002946	0.002759	0.00714	0.010149	0.000737	0.001311	0.01111	0.012558	0.001311	0.001723	0.002846	0.010661	0.00166	0.002022	0.040857
Candidatus Portiera aleyrodidarum TV uid195460	0.101548	0.070974	0.006958	0.01004	0.074532	0.056616	0.005575	0.020897	0.02135	0.017576	0.002912	0.001847	0.019321	0.015117	0.000907	0.002969	0.002108	0.044366	0.001383	0.000329	0.078714	0.039946	0.00136	0.005836	0.017871	0.017984	0.002017	0.00247	0.000612	0.011638	0.000646	0.008352	0.023095	0.015967	0.001077	0.001609	0.003706	0.007797	0.000227	0.000567	0.011684	0.013939	0.001133	0.001337	0.001541	0.013939	0.000442	0.001009	0.046972
Candidatus Protochlamydia amoebophila UWE25 uid58079	0.058346	0.037142	0.01078	0.01268	0.011987	0.049182	0.014555	0.019443	0.019621	0.017624	0.007068	0.007192	0.011051	0.012417	0.008136	0.003517	0.001986	0.026716	0.007367	0.000483	0.048553	0.042199	0.008633	0.018919	0.01239	0.023064	0.006591	0.004967	0.000596	0.008361	0.005127	0.01134	0.039588	0.019909	0.005505	0.009788	0.010955	0.024869	0.008672	0.005393	0.009776	0.01939	0.006807	0.003025	0.008203	0.009941	0.006051	0.002355	0.052432
Candidatus Puniceispirillum marinum IMCC1322 uid47081	0.025544	0.024301	0.011189	0.015866	0.009655	0.031434	0.024853	0.030785	0.016763	0.007685	0.019025	0.011976	0.003529	0.008223	0.013307	0.002365	0.001164	0.020477	0.003978	0.001058	0.010406	0.027561	0.012311	0.020201	0.014928	0.007787	0.00554	0.011767	0.000852	0.00576	0.004229	0.012179	0.014059	0.019315	0.004015	0.019481	0.008187	0.02223	0.005068	0.028485	0.013842	0.009475	0.007764	0.012878	0.004291	0.016179	0.018333	0.009474	0.036702
Candidatus Rickettsia amblyommii GAT 30V uid156845	0.066409	0.051662	0.012665	0.017604	0.04176	0.044756	0.011891	0.021315	0.01493	0.022363	0.00845	0.006695	0.015504	0.016903	0.010724	0.00385	0.002161	0.031225	0.006243	0.00086	0.05072	0.038394	0.007847	0.009255	0.014099	0.016344	0.004334	0.005249	0.000739	0.006932	0.003233	0.007604	0.024301	0.015052	0.00352	0.008163	0.013192	0.020999	0.003166	0.00374	0.006651	0.015405	0.00208	0.008508	0.00283	0.008531	0.002225	0.001008	0.045799
Candidatus Riesia pediculicola USDA uid46841	0.084375	0.0461	0.013417	0.020491	0.038391	0.055598	0.020569	0.022733	0.013365	0.016844	0.00377	0.003816	0.03028	0.012775	0.00357	0.004081	0.002073	0.028395	0.007198	0.000609	0.042421	0.045835	0.012186	0.017608	0.017317	0.03475	0.007813	0.006116	0.000829	0.009867	0.002701	0.008189	0.025369	0.01687	0.002695	0.005824	0.010631	0.014861	0.003732	0.003803	0.012795	0.009497	0.001354	0.003434	0.008228	0.005325	0.00057	0.000855	0.048854
Candidatus Ruthia magnifica Cm Calyptogena magnifica uid58645	0.059312	0.042764	0.013865	0.015156	0.014034	0.063716	0.012006	0.026132	0.017209	0.020391	0.010901	0.005562	0.009346	0.016368	0.006614	0.002435	0.002155	0.0243	0.006696	0.000512	0.043142	0.038979	0.004929	0.019873	0.019583	0.016949	0.003361	0.003103	0.000515	0.007322	0.002963	0.008936	0.035139	0.015667	0.005953	0.006474	0.012306	0.016848	0.003436	0.004551	0.014354	0.012039	0.002813	0.002093	0.003459	0.014846	0.005382	0.00076	0.038239
Candidatus Saccharobacterium alaburgensis uid203361	0.029144	0.019535	0.017207	0.022028	0.011869	0.025155	0.027733	0.022961	0.018045	0.014223	0.017557	0.016152	0.005007	0.015553	0.015393	0.003956	0.001529	0.019833	0.014492	0.001222	0.007703	0.024608	0.01068	0.013084	0.012822	0.00841	0.004113	0.010647	0.000635	0.003914	0.002915	0.011292	0.018727	0.011885	0.010385	0.019395	0.011047	0.020646	0.02529	0.014702	0.013182	0.008685	0.0088	0.010343	0.010172	0.015029	0.015242	0.006485	0.028692
Candidatus Solibacter usitatus Ellin6076 uid58139	0.010385	0.011791	0.021577	0.024168	0.00186	0.011309	0.034572	0.021649	0.004144	0.005654	0.026463	0.021491	0.001736	0.004092	0.018253	0.003276	0.000728	0.009259	0.018307	0.000833	0.001839	0.00888	0.030909	0.01179	0.002518	0.002817	0.01501	0.016926	0.001043	0.001503	0.007493	0.014704	0.008	0.005981	0.013985	0.027605	0.002627	0.008029	0.028986	0.044748	0.003704	0.004873	0.018968	0.028195	0.004545	0.006148	0.036845	0.015844	0.023682
Candidatus Sulcia muelleri CARI uid52535	0.130863	0.0828	0.003269	0.005702	0.072005	0.060946	0.004032	0.017226	0.017357	0.018705	0.001455	0.000919	0.01948	0.011512	0.000668	0.001515	0.002529	0.049649	0.001539	0.000155	0.070394	0.054385	0.002434	0.003686	0.02016	0.029895	0.001181	0.000549	0.000251	0.010343	0.000418	0.006919	0.017631	0.01317	0.000382	0.000835	0.004736	0.010891	0.000501	0.00062	0.010522	0.015401	0.001002	0.000382	0.000811	0.006955	4.8e-05	0.000227	0.049077
Candidatus Sulcia muelleri DMIN uid47075	0.118666	0.079176	0.004827	0.007084	0.072797	0.057976	0.004775	0.017273	0.017912	0.019634	0.001461	0.000874	0.02013	0.012994	0.000926	0.002048	0.002427	0.050005	0.002074	0.000196	0.067108	0.052001	0.002544	0.004853	0.02073	0.029301	0.001683	0.001083	0.000326	0.010789	0.0006	0.006653	0.018003	0.013372	0.0006	0.001018	0.005753	0.011272	0.000744	0.00077	0.01045	0.015068	0.001122	0.000704	0.000939	0.006836	0.000104	0.000209	0.047944
Candidatus Sulcia muelleri GWSS uid58943	0.118945	0.079469	0.004669	0.007216	0.073208	0.057688	0.00459	0.017443	0.017921	0.019751	0.001472	0.000915	0.02003	0.01292	0.000915	0.00199	0.002401	0.049716	0.002096	0.000212	0.066443	0.051467	0.002481	0.004563	0.020839	0.029381	0.001645	0.001088	0.000398	0.010917	0.000623	0.00642	0.017854	0.013358	0.00061	0.000982	0.005638	0.011116	0.000743	0.000716	0.010585	0.015095	0.001141	0.000703	0.000968	0.006898	0.000106	0.000239	0.04835
Candidatus Sulcia muelleri SMDSEM uid59393	0.133237	0.074075	0.004895	0.00853	0.055238	0.063505	0.004835	0.018009	0.014757	0.019545	0.002808	0.001224	0.020084	0.011578	0.000696	0.00168	0.002304	0.042425	0.001704	0.00024	0.071519	0.057374	0.003179	0.007271	0.018573	0.029815	0.003035	0.001968	0.00036	0.010246	0.000612	0.007187	0.02078	0.012754	0.000648	0.001512	0.004775	0.012946	0.000804	0.001536	0.010702	0.014265	0.001692	0.00126	0.001608	0.004235	0.000144	0.001032	0.052467
Candidatus Sulcia muelleri Sulcia ALF uid214083	0.115305	0.074904	0.005196	0.009574	0.065497	0.056508	0.007602	0.017427	0.017527	0.019967	0.002389	0.000969	0.02137	0.013116	0.001086	0.002139	0.002189	0.046967	0.002272	0.000401	0.06528	0.046951	0.003292	0.005146	0.021086	0.029975	0.001754	0.001387	0.000551	0.01081	0.000635	0.005597	0.020334	0.013551	0.000585	0.001404	0.007135	0.012314	0.000919	0.001086	0.01066	0.014954	0.001404	0.00127	0.00122	0.007302	0.000134	0.000401	0.048889
Candidatus Tremblaya princeps PCIT uid68741	0.00395	0.005191	0.016029	0.020338	0.023342	0.009304	0.011589	0.033233	0.011361	0.009369	0.012144	0.015082	0.008521	0.004277	0.022754	0.043974	0.00062	0.006562	0.017074	0.002122	0.003003	0.003689	0.015898	0.005811	0.012862	0.009337	0.012079	0.013189	0.001208	0.004832	0.025137	0.007868	0.004864	0.012536	0.020567	0.020044	0.020567	0.015898	0.015115	0.030197	0.014756	0.010022	0.007998	0.009467	0.006954	0.009598	0.02517	0.011197	0.007215
Candidatus Tremblaya princeps PCVAL uid159519	0.003971	0.005272	0.015783	0.020087	0.023725	0.009143	0.011812	0.032734	0.011345	0.008976	0.012213	0.014482	0.008442	0.003971	0.02289	0.044713	0.000567	0.00644	0.016651	0.002069	0.003036	0.00357	0.016183	0.005739	0.012813	0.009543	0.012213	0.013114	0.001235	0.004638	0.024926	0.007841	0.004671	0.012346	0.020154	0.020354	0.020454	0.016083	0.015316	0.030265	0.015149	0.00971	0.007975	0.009143	0.007007	0.009643	0.024926	0.011045	0.007207
Candidatus Uzinura diaspidicola ASNER uid186740	0.079658	0.046813	0.009005	0.017127	0.045141	0.055488	0.009162	0.020207	0.015468	0.021958	0.004265	0.002857	0.021893	0.014178	0.003857	0.004292	0.001856	0.037032	0.006056	0.00054	0.03898	0.042613	0.006411	0.010571	0.014626	0.032332	0.003857	0.00258	0.000592	0.008794	0.00237	0.007346	0.023459	0.019207	0.002712	0.005648	0.013981	0.023169	0.00287	0.002646	0.010545	0.016995	0.002027	0.001277	0.004055	0.011361	0.001804	0.000895	0.05329
Candidatus Vesicomyosocius okutanii HA uid59427	0.06152	0.048155	0.01308	0.015535	0.018545	0.067327	0.010486	0.025687	0.018469	0.023742	0.007938	0.003554	0.01091	0.017023	0.005073	0.002335	0.002159	0.025801	0.005985	0.000537	0.050063	0.038633	0.005011	0.015039	0.020277	0.019061	0.002838	0.002455	0.00053	0.008437	0.002204	0.008909	0.033894	0.01684	0.004439	0.006264	0.01246	0.016964	0.002511	0.00248	0.014485	0.013276	0.001732	0.001787	0.003585	0.015828	0.003444	0.000851	0.039111
Candidatus Zinderia insecticola CARI uid52459	0.174905	0.124543	0.003047	0.003769	0.102457	0.0707	0.00093	0.01219	0.012302	0.013457	0.000209	0.00016	0.018958	0.010473	0.000337	0.000449	0.003063	0.055495	0.001652	0.000176	0.086899	0.067781	0.001171	0.002326	0.015093	0.024876	0.000465	0.000481	0.005774	0.010281	0.000481	0.000225	0.011596	0.009367	0.000225	0.000192	0.001347	0.002181	3.2e-05	1.6e-05	0.007474	0.011468	0.000545	0.000192	6.4e-05	0.000818	4.8e-05	0	0.03211
Capnocytophaga canimorsus Cc5 uid70727	0.06581	0.039644	0.018322	0.015216	0.018194	0.042344	0.016926	0.021667	0.014067	0.017115	0.016867	0.008038	0.0083	0.012934	0.007479	0.001991	0.00219	0.027934	0.014018	0.000608	0.027321	0.040398	0.013719	0.025332	0.012573	0.013028	0.006287	0.008793	0.000372	0.00577	0.002351	0.010959	0.03249	0.010569	0.008195	0.009286	0.007936	0.018989	0.006099	0.006265	0.0073	0.016063	0.00572	0.004817	0.007352	0.012557	0.004898	0.00174	0.050674
Capnocytophaga ochracea DSM 7271 uid59197	0.055099	0.03033	0.024733	0.020796	0.022648	0.029793	0.018997	0.021336	0.013146	0.023769	0.019097	0.006847	0.006659	0.01353	0.009632	0.002133	0.001929	0.027527	0.016993	0.00061	0.023191	0.031913	0.01725	0.020385	0.0095	0.013045	0.003978	0.008191	0.00035	0.005038	0.003074	0.010831	0.028223	0.007516	0.011234	0.010332	0.008087	0.018168	0.01693	0.00639	0.005563	0.021334	0.006963	0.003062	0.003496	0.012743	0.012641	0.001077	0.045595
Carboxydothermus hydrogenoformans Z 2901 uid57821	0.055856	0.025422	0.01551	0.022311	0.018021	0.042748	0.013818	0.019973	0.006192	0.012229	0.022188	0.007278	0.008611	0.009301	0.009143	0.007706	0.002384	0.022256	0.014026	0.00071	0.042236	0.039542	0.006132	0.016726	0.004327	0.006699	0.009813	0.006348	0.000557	0.004705	0.004247	0.008479	0.01269	0.008927	0.006101	0.015417	0.00557	0.025052	0.00573	0.01476	0.00562	0.009464	0.012049	0.014656	0.003454	0.004763	0.006251	0.016147	0.057174
Cardinium endosymbiont cEper1 of Encarsia pergandiella uid175524	0.054852	0.031333	0.011288	0.018803	0.029216	0.039295	0.014178	0.02324	0.017068	0.015525	0.016781	0.007228	0.011387	0.014233	0.008512	0.005634	0.002187	0.030897	0.00896	0.001217	0.03573	0.037426	0.006278	0.022212	0.009156	0.018395	0.006671	0.003585	0.000487	0.009333	0.003919	0.010134	0.031827	0.022243	0.005685	0.011481	0.017374	0.01843	0.005517	0.008049	0.013491	0.016243	0.006286	0.003098	0.004668	0.011194	0.00468	0.003977	0.038722
Carnobacterium 17 4 uid65789	0.05803	0.035776	0.012335	0.011214	0.014122	0.047962	0.019596	0.026931	0.024496	0.018651	0.007277	0.010014	0.00968	0.015561	0.006715	0.001466	0.00237	0.024765	0.010944	0.000497	0.044359	0.034436	0.009842	0.020619	0.015761	0.016539	0.003482	0.004048	0.000394	0.003892	0.001268	0.008431	0.031397	0.01305	0.004647	0.005861	0.010695	0.012732	0.002788	0.005497	0.01456	0.012294	0.002187	0.004269	0.005253	0.012188	0.004051	0.001815	0.064697
Carnobacterium maltaromaticum LMA28 uid179370	0.059766	0.039253	0.01054	0.012668	0.01105	0.055935	0.012557	0.025229	0.025454	0.018799	0.00671	0.009525	0.00788	0.018306	0.006933	0.001536	0.002345	0.028189	0.007896	0.00063	0.052707	0.036988	0.008877	0.016278	0.016495	0.014225	0.003157	0.003865	0.000468	0.004542	0.001303	0.009002	0.031829	0.013146	0.003465	0.006262	0.011811	0.01117	0.002698	0.003957	0.016436	0.01161	0.002092	0.003615	0.006242	0.012329	0.004277	0.001966	0.058203
Catenulispora acidiphila DSM 44928 uid59077	0.00185	0.001521	0.020047	0.019096	0.001055	0.00127	0.033577	0.017446	0.002568	0.002413	0.039388	0.020038	0.000776	0.002017	0.01647	0.002111	0.000217	0.002875	0.018865	0.000669	0.000191	0.000867	0.028	0.006485	0.001768	0.001427	0.018333	0.018354	0.001993	0.00091	0.006579	0.01524	0.002984	0.002813	0.018892	0.027848	0.000966	0.002442	0.025456	0.062428	0.001942	0.00252	0.017172	0.037293	0.002954	0.004415	0.036186	0.023162	0.009768
Caulobacter crescentus CB15 uid57891	0.002667	0.004651	0.018963	0.032442	0.000641	0.002876	0.04011	0.021632	0.001445	0.001419	0.032717	0.016559	0.00086	0.001369	0.016397	0.002197	0.000612	0.009669	0.011327	0.00101	0.00035	0.004248	0.031109	0.006861	0.001722	0.00173	0.008582	0.021074	0.001459	0.001061	0.006397	0.014105	0.004488	0.005273	0.01268	0.027506	0.001414	0.006233	0.017026	0.068245	0.002249	0.003512	0.018774	0.030133	0.003745	0.008068	0.042843	0.01543	0.015423
Caulobacter crescentus NA1000 uid59307	0.002704	0.004698	0.019157	0.032678	0.000571	0.002941	0.040259	0.021807	0.00148	0.001423	0.03295	0.016719	0.000884	0.001383	0.016531	0.002115	0.000632	0.009764	0.01145	0.001031	0.000343	0.00429	0.031286	0.006979	0.001672	0.00172	0.008664	0.02118	0.001484	0.001061	0.006393	0.014236	0.004486	0.00517	0.012528	0.027221	0.001423	0.005985	0.017014	0.068456	0.002079	0.003509	0.018848	0.030253	0.003496	0.00795	0.042645	0.015184	0.015261
Caulobacter K31 uid58551	0.002834	0.004787	0.019121	0.030206	0.000714	0.002799	0.040463	0.021378	0.001414	0.001436	0.035518	0.01561	0.000746	0.001349	0.017183	0.002529	0.000436	0.009308	0.012443	0.00114	0.000262	0.003472	0.031781	0.007624	0.001385	0.001213	0.009645	0.02076	0.001571	0.000746	0.006622	0.014233	0.005003	0.005287	0.013409	0.026057	0.001604	0.004609	0.016456	0.070172	0.00254	0.002798	0.019863	0.029899	0.003616	0.005444	0.040615	0.017825	0.014959
Caulobacter segnis ATCC 21756 uid41709	0.002523	0.00408	0.01984	0.032424	0.000596	0.002471	0.040437	0.0213	0.001204	0.001356	0.032397	0.018127	0.000634	0.001111	0.017045	0.001998	0.000572	0.008222	0.013893	0.001089	0.000247	0.002952	0.032889	0.007232	0.001125	0.001373	0.009432	0.021688	0.001403	0.000626	0.006399	0.014294	0.004732	0.004396	0.013284	0.026234	0.001706	0.00528	0.018514	0.067316	0.00215	0.003004	0.018764	0.030705	0.003289	0.006506	0.042931	0.014939	0.014182
Cellulomonas fimi ATCC 484 uid66779	4.7e-05	8.7e-05	0.013633	0.012581	3.5e-05	8.2e-05	0.0237	0.012744	0.000784	0.000372	0.028203	0.035832	0.00012	0.000225	0.0107	0.001129	2.2e-05	0.000155	0.017517	0.00017	9e-06	7.8e-05	0.024243	0.000676	0.000453	0.000252	0.013501	0.021486	0.00275	0.000104	0.005269	0.015812	0.000199	0.000334	0.021097	0.026069	0.000124	0.000536	0.054227	0.047044	0.00062	0.001254	0.024681	0.035609	0.002033	0.005665	0.044547	0.026783	0.001059
Cellulomonas flavigena DSM 20109 uid48821	9e-05	0.00017	0.013513	0.012047	7.2e-05	0.000147	0.022934	0.012887	0.001284	0.000478	0.028814	0.034869	0.000226	0.000433	0.010574	0.00167	2.3e-05	0.000256	0.017325	0.000195	2.6e-05	0.000158	0.022997	0.001244	0.000755	0.000297	0.01309	0.020558	0.002751	0.000173	0.005814	0.016001	0.000338	0.000502	0.021685	0.025856	0.000245	0.000565	0.048764	0.051676	0.001005	0.001484	0.024483	0.035406	0.002573	0.007186	0.045577	0.024928	0.001331
Cellulophaga algicola DSM 14237 uid62159	0.062036	0.044649	0.016013	0.01561	0.025106	0.04462	0.010515	0.020587	0.021278	0.018639	0.013408	0.008694	0.013977	0.017445	0.007191	0.002998	0.002212	0.030104	0.010816	0.00052	0.046627	0.042778	0.008913	0.013205	0.01171	0.022217	0.004011	0.003237	0.000187	0.005423	0.001986	0.010429	0.024184	0.012645	0.004152	0.007273	0.012152	0.015025	0.003185	0.003219	0.011903	0.014894	0.003056	0.002932	0.002984	0.007544	0.002703	0.001299	0.051413
Cellulophaga lytica DSM 7489 uid63401	0.069204	0.042226	0.024381	0.014	0.031915	0.042186	0.002593	0.019878	0.029105	0.021958	0.008933	0.004027	0.015611	0.017318	0.00717	0.003395	0.002345	0.026021	0.0156	0.000424	0.05298	0.046875	0.003191	0.011895	0.008111	0.027512	0.001299	0.001611	0.000108	0.005228	0.001918	0.010106	0.024896	0.009432	0.006607	0.006532	0.011415	0.012663	0.000785	0.002178	0.014682	0.014339	0.001251	0.002498	0.001206	0.007876	0.001842	0.000195	0.046483
Cellvibrio gilvus ATCC 13127 uid68143	0.000103	0.00015	0.013838	0.01407	6.6e-05	0.000153	0.027395	0.013741	0.001032	0.000561	0.027816	0.035959	0.000181	0.000385	0.011141	0.001381	2.8e-05	0.000324	0.017366	0.000254	1.8e-05	0.000131	0.024015	0.001477	0.000839	0.000393	0.012861	0.022399	0.002668	0.000192	0.005475	0.015827	0.000351	0.000766	0.020618	0.027389	0.000189	0.000615	0.043553	0.055955	0.000905	0.001254	0.024697	0.033219	0.002168	0.007341	0.044328	0.023881	0.001585
Cellvibrio japonicus Ueda107 uid59139	0.025019	0.021484	0.019309	0.01507	0.00665	0.026429	0.023445	0.020999	0.009252	0.00731	0.028681	0.008337	0.001655	0.012318	0.017752	0.002802	0.001376	0.017701	0.014159	0.000507	0.011082	0.024063	0.01389	0.02454	0.007104	0.00652	0.013081	0.008374	0.000843	0.004376	0.005328	0.014915	0.019639	0.011798	0.01131	0.027791	0.003739	0.008667	0.012985	0.045703	0.006834	0.008059	0.01601	0.014631	0.002885	0.012621	0.029903	0.005779	0.032128
Cenarchaeum symbiosum A uid61411	0.012106	0.008214	0.021232	0.029165	0.035042	0.006503	0.017094	0.028865	0.013219	0.005649	0.017837	0.015834	0.006905	0.003349	0.016401	0.024713	0.000619	0.011574	0.01919	0.001393	0.002731	0.019366	0.015891	0.006012	0.008735	0.007731	0.017103	0.017448	0.001317	0.00238	0.009152	0.008555	0.003847	0.00663	0.014167	0.019947	0.006606	0.012552	0.021478	0.032994	0.00652	0.005386	0.020761	0.01955	0.001713	0.002488	0.014501	0.013314	0.016706
Chamaesiphon PCC 6605 uid183005	0.031785	0.028215	0.012207	0.012893	0.005545	0.03391	0.031134	0.019104	0.012573	0.018384	0.01642	0.01179	0.007034	0.014996	0.011608	0.001909	0.001604	0.020088	0.009724	0.001129	0.028239	0.025727	0.011602	0.021594	0.007126	0.011214	0.006684	0.013208	0.000563	0.006185	0.004278	0.014218	0.032586	0.01127	0.007488	0.016071	0.014598	0.007248	0.020012	0.015791	0.014439	0.009306	0.01334	0.010201	0.012421	0.00797	0.016754	0.009603	0.038746
Chelativorans BNC1 uid58069	0.008376	0.011254	0.01592	0.024013	0.004365	0.011285	0.039443	0.024404	0.005413	0.003697	0.021374	0.020579	0.002372	0.002492	0.014685	0.006025	0.000559	0.012956	0.009726	0.000727	0.001024	0.009911	0.028146	0.009544	0.003906	0.003474	0.015422	0.016078	0.001803	0.001266	0.006926	0.01273	0.006733	0.01033	0.009403	0.024264	0.002749	0.019619	0.030276	0.036766	0.004779	0.006139	0.015242	0.025021	0.004425	0.008196	0.03456	0.016887	0.026102
Chitinophaga pinensis DSM 2588 uid59113	0.039346	0.028694	0.022297	0.020046	0.013785	0.020454	0.031706	0.023541	0.017951	0.01162	0.020457	0.011707	0.009325	0.013026	0.012988	0.006017	0.001643	0.026931	0.015234	0.000477	0.013697	0.022934	0.022189	0.012168	0.008293	0.011142	0.012171	0.004227	0.000553	0.005251	0.003092	0.012791	0.011759	0.013071	0.007276	0.02904	0.004082	0.009897	0.010443	0.044729	0.007812	0.01329	0.006634	0.013356	0.001826	0.013874	0.00799	0.005601	0.03857
Chlamydia muridarum Nigg uid57785	0.04244	0.025666	0.010858	0.017085	0.012289	0.037952	0.01702	0.019728	0.01652	0.017529	0.008907	0.007426	0.01096	0.010426	0.008159	0.003398	0.001752	0.021557	0.00915	0.000845	0.033893	0.033039	0.015936	0.020423	0.010156	0.034803	0.012575	0.006159	0.0005	0.010299	0.006059	0.009752	0.027756	0.016308	0.006357	0.013963	0.013504	0.025852	0.010314	0.008094	0.010063	0.022281	0.007286	0.003488	0.009898	0.012246	0.007022	0.004075	0.04235
Chlamydia pecorum P787 uid221292	0.038373	0.02255	0.013546	0.023394	0.013822	0.034055	0.019938	0.019344	0.018317	0.014643	0.010172	0.008231	0.009766	0.010134	0.009857	0.005507	0.001583	0.023424	0.009145	0.000791	0.030948	0.034784	0.01334	0.016582	0.010513	0.033725	0.012702	0.004768	0.000347	0.010316	0.005668	0.009669	0.025727	0.017891	0.007222	0.015723	0.014281	0.030939	0.014881	0.00766	0.009045	0.02348	0.009298	0.003292	0.005763	0.011813	0.008413	0.003365	0.039126
Chlamydia pecorum PV3056 3 uid221290	0.038267	0.02246	0.013629	0.02345	0.013756	0.033959	0.019928	0.019399	0.018282	0.014725	0.010066	0.008157	0.009643	0.010066	0.009827	0.005525	0.001575	0.023462	0.009109	0.000815	0.031093	0.034825	0.013313	0.016587	0.010435	0.033714	0.012725	0.004831	0.000328	0.01032	0.005711	0.009673	0.02576	0.017866	0.007171	0.015854	0.014164	0.030951	0.01482	0.00764	0.00905	0.023654	0.00918	0.003303	0.005723	0.011821	0.008394	0.003365	0.039097
Chlamydia pecorum W73 uid221291	0.038433	0.022403	0.013614	0.023471	0.01382	0.034072	0.01994	0.019346	0.018242	0.014553	0.010151	0.008203	0.009754	0.010116	0.009836	0.00549	0.001568	0.023442	0.00913	0.000806	0.030956	0.03482	0.01332	0.016565	0.010578	0.03374	0.012696	0.004814	0.000347	0.010304	0.005711	0.009674	0.025716	0.017886	0.00717	0.015736	0.014317	0.030971	0.014891	0.007659	0.00903	0.023542	0.009286	0.00329	0.00572	0.011813	0.008412	0.003381	0.039239
Chlamydia psittaci 01DC12 uid179070	0.043489	0.027002	0.013494	0.018326	0.017321	0.035959	0.018595	0.019608	0.019132	0.01713	0.009329	0.007538	0.011345	0.01248	0.007619	0.00361	0.001655	0.022641	0.010577	0.000734	0.038145	0.030867	0.015527	0.015819	0.012622	0.031855	0.01045	0.005875	0.000352	0.010874	0.005046	0.009546	0.027776	0.016986	0.007533	0.011677	0.014716	0.02265	0.011339	0.007345	0.008754	0.02332	0.007432	0.003804	0.005606	0.015013	0.006441	0.002542	0.044915
Chlamydia psittaci 84 55 uid175571	0.04349	0.02729	0.013635	0.018309	0.017324	0.035972	0.018493	0.019588	0.019317	0.017028	0.009302	0.007472	0.011351	0.012445	0.007768	0.00364	0.00185	0.022598	0.010529	0.000899	0.037983	0.030783	0.015675	0.015856	0.012713	0.031843	0.010414	0.005846	0.000465	0.010908	0.005085	0.009458	0.027864	0.016901	0.007392	0.011641	0.014738	0.022702	0.011334	0.00736	0.008719	0.023092	0.007317	0.003876	0.005625	0.014916	0.006438	0.002485	0.044929
Chlamydia psittaci GR9 uid175572	0.043842	0.02699	0.013436	0.018378	0.01715	0.036192	0.018509	0.019634	0.019301	0.017054	0.009363	0.007463	0.011288	0.012378	0.007723	0.003597	0.001803	0.022565	0.010631	0.000839	0.038088	0.031086	0.015456	0.015622	0.012449	0.031946	0.010312	0.005879	0.000403	0.010809	0.005064	0.009582	0.027667	0.017089	0.007417	0.01163	0.014819	0.022746	0.01135	0.007405	0.00858	0.023255	0.007434	0.003922	0.005491	0.014962	0.006467	0.002504	0.044856
Chlamydia psittaci M56 uid175576	0.043831	0.027632	0.013376	0.018137	0.017866	0.036397	0.017972	0.019555	0.019593	0.017545	0.009112	0.007125	0.011441	0.012482	0.007713	0.003699	0.001747	0.022787	0.010426	0.000845	0.038695	0.031276	0.015132	0.015764	0.012906	0.032086	0.010158	0.005646	0.000409	0.010914	0.005029	0.009535	0.028165	0.017024	0.007307	0.011574	0.014968	0.02333	0.010602	0.007015	0.008699	0.023122	0.007162	0.003838	0.005585	0.014766	0.006352	0.002465	0.045068
Chlamydia psittaci MN uid175573	0.04351	0.027122	0.013591	0.018258	0.017343	0.035932	0.01859	0.019439	0.019304	0.017111	0.009345	0.007523	0.011361	0.01249	0.007715	0.00358	0.001767	0.022647	0.010554	0.000812	0.038151	0.030814	0.015573	0.015693	0.012659	0.031972	0.01044	0.005836	0.000377	0.0109	0.005058	0.009502	0.027823	0.016985	0.007466	0.01163	0.014732	0.022659	0.011392	0.007355	0.008733	0.023193	0.007409	0.003795	0.00553	0.014938	0.006382	0.002531	0.045034
Chlamydia psittaci VS225 uid175574	0.043359	0.027104	0.013478	0.018325	0.017393	0.036111	0.018475	0.019656	0.019251	0.016814	0.00923	0.007451	0.011415	0.012367	0.007723	0.003657	0.001855	0.022685	0.010483	0.000923	0.038183	0.031071	0.015498	0.016027	0.012677	0.031814	0.010249	0.00583	0.000428	0.010822	0.00509	0.009514	0.027896	0.017066	0.007448	0.011589	0.014743	0.022844	0.011285	0.007364	0.008698	0.023195	0.007367	0.003808	0.005602	0.015049	0.006444	0.002517	0.045171
Chlamydia psittaci WC uid175577	0.043567	0.027242	0.013597	0.01822	0.017287	0.035834	0.018511	0.019479	0.019519	0.017084	0.009344	0.007459	0.011351	0.012464	0.007849	0.003553	0.001791	0.022662	0.010482	0.00082	0.038072	0.03073	0.015638	0.015712	0.01262	0.031877	0.010397	0.005828	0.000367	0.010875	0.005022	0.009497	0.0279	0.016999	0.007445	0.011675	0.01477	0.02273	0.011334	0.007334	0.008734	0.023254	0.007391	0.003838	0.005571	0.014858	0.006448	0.002497	0.045027
Chlamydia psittaci WS RT E30 uid175575	0.043783	0.02692	0.013283	0.018478	0.017193	0.036228	0.018448	0.019636	0.019209	0.016984	0.009397	0.007446	0.011271	0.012325	0.007682	0.003642	0.001827	0.022574	0.010546	0.000843	0.038255	0.031104	0.015372	0.015755	0.012487	0.031896	0.010272	0.005858	0.000407	0.010817	0.005053	0.009562	0.027674	0.017131	0.007396	0.011624	0.014736	0.02285	0.011282	0.007355	0.008619	0.023369	0.007366	0.003878	0.005563	0.015036	0.006497	0.002528	0.045047
Chlamydia trachomatis 434 Bu uid61633	0.040116	0.02422	0.010647	0.017503	0.011154	0.034854	0.019793	0.019987	0.016769	0.01684	0.009114	0.008124	0.011151	0.010369	0.008486	0.002464	0.001578	0.020776	0.009848	0.000876	0.032438	0.030672	0.017564	0.019638	0.009489	0.033625	0.012315	0.006798	0.000404	0.01011	0.006057	0.009579	0.027115	0.016222	0.006666	0.014583	0.014854	0.022898	0.012222	0.010048	0.00957	0.02424	0.005689	0.004133	0.009528	0.013108	0.007752	0.004211	0.042263
Chlamydia trachomatis A 363 uid196769	0.03992	0.024118	0.010736	0.01739	0.011196	0.034877	0.019813	0.019951	0.016821	0.017013	0.009096	0.008246	0.011142	0.010336	0.008396	0.002522	0.001592	0.020705	0.009931	0.000885	0.032473	0.030607	0.017595	0.019708	0.009534	0.033739	0.012273	0.00684	0.0004	0.010228	0.006009	0.009573	0.027126	0.016294	0.006702	0.014658	0.014859	0.022776	0.012126	0.009911	0.009627	0.024205	0.005744	0.004097	0.009531	0.013111	0.007664	0.004193	0.042237
Chlamydia trachomatis A 5291 uid196770	0.039844	0.024128	0.010766	0.017366	0.011217	0.034798	0.019761	0.019876	0.016812	0.016985	0.00911	0.008256	0.011313	0.010398	0.008518	0.002603	0.001695	0.020777	0.009925	0.000921	0.032365	0.030686	0.017653	0.019655	0.009592	0.03373	0.012317	0.006887	0.000547	0.010322	0.006072	0.009653	0.02708	0.016323	0.006705	0.014638	0.01482	0.022718	0.012106	0.009899	0.009608	0.024144	0.005746	0.004118	0.00957	0.013059	0.007648	0.004221	0.042073
Chlamydia trachomatis A HAR 13 uid58333	0.039923	0.02419	0.010743	0.017446	0.011307	0.034799	0.019818	0.020016	0.016817	0.017053	0.009136	0.008201	0.011221	0.010338	0.008434	0.002557	0.001591	0.020724	0.009949	0.000912	0.032385	0.030663	0.017643	0.019828	0.009534	0.033606	0.012248	0.006802	0.000399	0.010242	0.006043	0.009598	0.027152	0.016234	0.006722	0.014579	0.014898	0.022803	0.012203	0.009917	0.009671	0.024158	0.005804	0.004107	0.009522	0.013052	0.007666	0.004219	0.042072
Chlamydia trachomatis A2497 uid159863	0.039972	0.024141	0.010732	0.01751	0.011213	0.03487	0.01981	0.019921	0.016772	0.017032	0.009107	0.00823	0.01118	0.010316	0.008415	0.002499	0.001579	0.020775	0.009936	0.000871	0.032466	0.030601	0.017656	0.019784	0.009501	0.03361	0.012256	0.006807	0.000403	0.01015	0.005959	0.009562	0.02717	0.01633	0.00671	0.014621	0.0148	0.022822	0.012181	0.00993	0.009592	0.024161	0.005748	0.00411	0.009517	0.01312	0.007704	0.004214	0.042291
Chlamydia trachomatis A2497 uid159993	0.040171	0.024203	0.010814	0.017513	0.011359	0.034623	0.019796	0.020032	0.016741	0.017009	0.009102	0.008178	0.011526	0.010397	0.008484	0.002812	0.001665	0.020767	0.009906	0.000949	0.032346	0.031174	0.017712	0.020328	0.009672	0.033623	0.012308	0.006813	0.000479	0.010275	0.006025	0.009635	0.026962	0.016249	0.006662	0.014562	0.014881	0.022857	0.012204	0.009855	0.009578	0.024001	0.005832	0.004121	0.009537	0.012986	0.007607	0.004158	0.041874
Chlamydia trachomatis B Jali20 OT uid59351	0.040001	0.024197	0.010726	0.01751	0.011148	0.034987	0.019826	0.020018	0.016772	0.017032	0.009117	0.008253	0.011115	0.01029	0.008415	0.002489	0.001579	0.020746	0.009929	0.000864	0.032427	0.030572	0.017617	0.019752	0.009549	0.033616	0.012197	0.006804	0.000396	0.010124	0.00594	0.009533	0.027222	0.016376	0.006732	0.014605	0.014794	0.022725	0.012175	0.00991	0.009618	0.024151	0.005748	0.004104	0.009504	0.013153	0.007723	0.00424	0.0422
Chlamydia trachomatis B TZ1A828 OT uid59349	0.039955	0.024167	0.010714	0.017479	0.011204	0.03489	0.019854	0.019965	0.016817	0.017067	0.009088	0.008212	0.011201	0.010318	0.008436	0.002502	0.001587	0.02076	0.009939	0.000863	0.032454	0.030601	0.017651	0.01978	0.009497	0.033645	0.01222	0.006804	0.000402	0.010153	0.005964	0.009569	0.027184	0.016305	0.006723	0.014604	0.014796	0.022807	0.012184	0.009932	0.009611	0.024163	0.005743	0.004118	0.009517	0.013099	0.007716	0.004221	0.042301
Chlamydia trachomatis D EC uid159881	0.039907	0.024247	0.01074	0.017391	0.011258	0.034894	0.019878	0.020087	0.016766	0.016831	0.00908	0.008208	0.011248	0.010422	0.008452	0.002709	0.001551	0.020673	0.009929	0.000837	0.032436	0.030988	0.017564	0.020193	0.009546	0.033623	0.012272	0.006792	0.000409	0.010209	0.006052	0.009588	0.027027	0.016284	0.006692	0.014656	0.014891	0.022844	0.012143	0.009939	0.009598	0.024016	0.005759	0.004118	0.009469	0.013028	0.007622	0.004231	0.041956
Chlamydia trachomatis D LC uid159879	0.039912	0.024248	0.010745	0.017395	0.011263	0.034897	0.019876	0.020085	0.016765	0.016832	0.009082	0.008207	0.01125	0.010424	0.008445	0.002712	0.001547	0.020664	0.009925	0.00084	0.032436	0.030985	0.017559	0.020191	0.009545	0.03362	0.012277	0.006791	0.000409	0.010208	0.006058	0.00959	0.027018	0.016285	0.006692	0.014654	0.014892	0.022852	0.012148	0.009938	0.009594	0.024013	0.005756	0.004121	0.009471	0.013026	0.007622	0.004234	0.041955
Chlamydia trachomatis D SotonD1 uid196772	0.040008	0.024068	0.010744	0.017428	0.011182	0.034879	0.019836	0.019993	0.016836	0.016926	0.009012	0.008244	0.01117	0.010465	0.0084	0.002478	0.001578	0.020687	0.009873	0.000919	0.032433	0.030618	0.017553	0.019759	0.00955	0.033615	0.012255	0.006851	0.000471	0.01019	0.006063	0.009553	0.027048	0.016209	0.006723	0.01471	0.014867	0.022749	0.012172	0.009976	0.009652	0.024234	0.005689	0.004069	0.009534	0.013023	0.007703	0.004245	0.042245
Chlamydia trachomatis D SotonD5 uid196773	0.040027	0.024092	0.010699	0.017372	0.011164	0.0349	0.019847	0.020049	0.016753	0.016855	0.009042	0.008224	0.011132	0.010395	0.008413	0.002491	0.001574	0.020684	0.009898	0.000866	0.03247	0.030633	0.017551	0.019767	0.009458	0.033656	0.0122	0.0068	0.000417	0.01017	0.006031	0.009539	0.027141	0.016278	0.00672	0.014739	0.014851	0.022819	0.012158	0.009978	0.009616	0.024175	0.005714	0.004075	0.009523	0.01311	0.007657	0.004226	0.042281
Chlamydia trachomatis D SotonD6 uid196774	0.040019	0.024117	0.010728	0.017384	0.011173	0.03489	0.019824	0.020013	0.016795	0.016895	0.009064	0.008228	0.011141	0.010427	0.008404	0.002478	0.001572	0.020688	0.009893	0.000868	0.032438	0.030578	0.017544	0.019731	0.009525	0.033661	0.01223	0.006784	0.000413	0.010171	0.006025	0.009521	0.027117	0.016261	0.006691	0.014714	0.01483	0.022792	0.012169	0.009966	0.009608	0.024149	0.005708	0.004085	0.009512	0.013097	0.007671	0.004236	0.042279
Chlamydia trachomatis D UW 3 CX uid57637	0.040074	0.024132	0.010733	0.017458	0.011231	0.034836	0.019841	0.020072	0.016822	0.016928	0.009053	0.008215	0.011199	0.010396	0.008456	0.002528	0.00158	0.020715	0.009911	0.000864	0.032437	0.030693	0.017603	0.019809	0.009522	0.033657	0.01221	0.006796	0.000427	0.010133	0.006047	0.009535	0.02716	0.016267	0.006703	0.01468	0.014876	0.022905	0.012175	0.009966	0.009612	0.024125	0.005762	0.004108	0.009442	0.012978	0.007689	0.004214	0.042155
Chlamydia trachomatis E 11023 uid161369	0.040261	0.023991	0.010706	0.017538	0.011188	0.034938	0.019883	0.020047	0.016603	0.016706	0.008952	0.008194	0.011178	0.010372	0.008419	0.002512	0.001577	0.020699	0.009887	0.000912	0.032484	0.030917	0.017689	0.019848	0.009463	0.033563	0.0122	0.006774	0.000482	0.010227	0.006103	0.009543	0.027023	0.016224	0.00671	0.014657	0.014785	0.022857	0.012248	0.010009	0.00954	0.024052	0.005708	0.004073	0.00946	0.012977	0.007725	0.004221	0.042265
Chlamydia trachomatis E 150 uid161403	0.040227	0.023995	0.010718	0.017587	0.011185	0.034929	0.019882	0.020039	0.016605	0.016715	0.008983	0.008195	0.011217	0.010396	0.008391	0.002511	0.001593	0.020712	0.009875	0.000908	0.032476	0.030883	0.017699	0.019875	0.009418	0.033539	0.012192	0.006788	0.00048	0.010184	0.006093	0.00953	0.027037	0.01619	0.006708	0.014635	0.014742	0.022885	0.012221	0.010017	0.009489	0.024047	0.005736	0.004094	0.009456	0.012994	0.007689	0.004242	0.042229
Chlamydia trachomatis E Bour uid196775	0.040003	0.024068	0.010732	0.017419	0.011158	0.034886	0.019824	0.01999	0.016789	0.016879	0.009028	0.00827	0.01119	0.010435	0.008443	0.002472	0.001564	0.020662	0.009888	0.00087	0.03244	0.030659	0.017541	0.019754	0.009546	0.03361	0.012251	0.006818	0.000432	0.010198	0.006044	0.009543	0.027074	0.016249	0.006725	0.014717	0.014816	0.022731	0.012181	0.009994	0.009623	0.024215	0.005667	0.004071	0.009549	0.013016	0.007723	0.004228	0.042264
Chlamydia trachomatis E SotonE8 uid196777	0.039974	0.024125	0.010743	0.017472	0.011149	0.034852	0.019805	0.019987	0.016846	0.016958	0.009081	0.008257	0.011193	0.010471	0.008404	0.002518	0.001575	0.020687	0.00989	0.000879	0.032471	0.03064	0.017571	0.01969	0.009541	0.033663	0.012241	0.006838	0.000412	0.010126	0.00603	0.009599	0.027062	0.016239	0.006704	0.014644	0.014862	0.022732	0.012123	0.009963	0.009615	0.024208	0.005675	0.00408	0.009541	0.013037	0.007678	0.004224	0.042252
Chlamydia trachomatis E SW3 uid167483	0.04002	0.024079	0.010767	0.017494	0.011166	0.034898	0.019897	0.019994	0.016849	0.016872	0.009039	0.008248	0.011224	0.010407	0.008433	0.002464	0.001563	0.020642	0.00982	0.000862	0.032417	0.030586	0.017621	0.019825	0.009548	0.033555	0.012206	0.006789	0.000412	0.010148	0.006053	0.009548	0.027097	0.01623	0.006721	0.014625	0.014803	0.022837	0.012119	0.010002	0.009551	0.024153	0.005687	0.004059	0.009483	0.013033	0.007706	0.00426	0.042251
Chlamydia trachomatis F SW4 uid167484	0.040032	0.024116	0.010746	0.017527	0.011146	0.034946	0.019845	0.019949	0.016795	0.016866	0.009009	0.008264	0.011159	0.010433	0.00844	0.002449	0.001564	0.020688	0.009828	0.000859	0.032428	0.03063	0.017543	0.019845	0.009549	0.033534	0.012238	0.006781	0.000413	0.010111	0.006004	0.009555	0.027062	0.016245	0.006706	0.014638	0.014837	0.022815	0.012141	0.010007	0.009529	0.024158	0.005675	0.004065	0.009441	0.013051	0.007737	0.004247	0.042257
Chlamydia trachomatis F SW5 uid167485	0.040029	0.024102	0.010782	0.017466	0.011168	0.034955	0.019914	0.019943	0.01683	0.016862	0.009003	0.008243	0.011197	0.010428	0.008441	0.002445	0.001571	0.020687	0.009817	0.000857	0.032446	0.030595	0.017586	0.019804	0.009525	0.03353	0.012223	0.006769	0.000409	0.010145	0.006058	0.009584	0.027073	0.016229	0.006727	0.014632	0.014846	0.022852	0.012152	0.010002	0.009541	0.024138	0.005678	0.004078	0.009454	0.013048	0.007753	0.004246	0.04223
Chlamydia trachomatis G 11074 uid161409	0.040072	0.024047	0.010672	0.017531	0.011211	0.034918	0.019818	0.020126	0.016571	0.016793	0.00897	0.00817	0.011218	0.010373	0.008347	0.002553	0.001593	0.02072	0.009866	0.000896	0.032471	0.030859	0.017695	0.019869	0.009448	0.033611	0.012139	0.00675	0.000459	0.010254	0.006041	0.009557	0.02705	0.016266	0.006661	0.014644	0.014779	0.022927	0.012204	0.009988	0.009525	0.02399	0.005752	0.004088	0.009477	0.013093	0.00763	0.004249	0.042189
Chlamydia trachomatis G 11222 uid161361	0.040215	0.023988	0.010677	0.017524	0.011228	0.034952	0.019819	0.020141	0.016568	0.016745	0.009003	0.008192	0.011292	0.010446	0.008395	0.002543	0.001613	0.020746	0.00985	0.000895	0.032492	0.030847	0.017701	0.019913	0.009428	0.033538	0.0121	0.006766	0.000473	0.010211	0.006045	0.009528	0.02701	0.016214	0.00667	0.014669	0.014772	0.022925	0.012158	0.009995	0.00949	0.023978	0.005739	0.004104	0.009428	0.01304	0.007623	0.004255	0.042168
Chlamydia trachomatis G 9301 uid161377	0.04009	0.024023	0.010678	0.017516	0.011229	0.03489	0.019837	0.020128	0.01656	0.016801	0.008985	0.008181	0.011236	0.010383	0.008373	0.002565	0.001593	0.020728	0.009861	0.000898	0.032457	0.030848	0.017686	0.019849	0.009457	0.033602	0.012162	0.006754	0.000458	0.010261	0.006046	0.009569	0.027091	0.016253	0.006674	0.014647	0.014807	0.022943	0.01221	0.009979	0.009508	0.024014	0.005748	0.004094	0.009476	0.013066	0.007633	0.004251	0.042193
Chlamydia trachomatis G 9768 uid161353	0.040079	0.024048	0.010669	0.017517	0.011212	0.034916	0.019819	0.020125	0.016551	0.016792	0.008971	0.008187	0.011237	0.010387	0.008354	0.002562	0.001592	0.020738	0.009873	0.000896	0.03246	0.030887	0.017704	0.019868	0.009443	0.033577	0.012143	0.006752	0.000462	0.010261	0.006042	0.009558	0.02705	0.016272	0.006662	0.014637	0.014798	0.022924	0.01221	0.009976	0.00952	0.024009	0.005757	0.00409	0.009475	0.013074	0.007645	0.004248	0.042175
Chlamydia trachomatis G SotonG1 uid196779	0.040054	0.024101	0.01071	0.01739	0.011165	0.034866	0.019849	0.020051	0.016755	0.016832	0.009056	0.008225	0.011133	0.010418	0.008385	0.002485	0.001581	0.020673	0.009873	0.000869	0.032512	0.030636	0.01754	0.019775	0.009492	0.033682	0.012188	0.006795	0.00041	0.0102	0.006028	0.009517	0.027134	0.01627	0.006708	0.014757	0.014853	0.022793	0.012131	0.009953	0.00961	0.024149	0.005733	0.004076	0.00952	0.013112	0.00767	0.00422	0.04227
Chlamydia trachomatis Ia SotonIa1 uid196780	0.03996	0.024074	0.010729	0.017381	0.011139	0.034845	0.019858	0.019986	0.01676	0.016907	0.009068	0.008236	0.011174	0.010416	0.008412	0.002516	0.001581	0.020687	0.009891	0.000877	0.032409	0.0306	0.01757	0.01974	0.009587	0.033664	0.012269	0.006824	0.000403	0.010211	0.006008	0.009535	0.027124	0.016299	0.006731	0.014718	0.014852	0.022755	0.012157	0.009996	0.009609	0.024183	0.005707	0.004081	0.009519	0.013101	0.007685	0.004225	0.042287
Chlamydia trachomatis IU824 uid193712	0.039989	0.024002	0.010788	0.017406	0.011182	0.034972	0.019981	0.019959	0.016684	0.016814	0.009021	0.00822	0.011293	0.010362	0.008526	0.002578	0.001628	0.020681	0.009916	0.000885	0.032466	0.030705	0.017634	0.019848	0.009506	0.033439	0.012211	0.006771	0.000501	0.010193	0.006084	0.009714	0.027159	0.01629	0.006787	0.014633	0.014802	0.022836	0.012221	0.010036	0.009558	0.024112	0.005716	0.004066	0.009548	0.013028	0.007744	0.004291	0.042261
Chlamydia trachomatis IU888 uid193713	0.040049	0.024108	0.010767	0.017418	0.011186	0.034972	0.019972	0.019992	0.016775	0.01684	0.009024	0.008238	0.011186	0.010374	0.008452	0.002457	0.001565	0.020648	0.009871	0.000857	0.032427	0.030697	0.017616	0.01983	0.009527	0.033479	0.012228	0.006774	0.000419	0.010121	0.006021	0.009576	0.027081	0.016256	0.006742	0.014659	0.014815	0.022819	0.012176	0.010043	0.009546	0.024153	0.00568	0.004087	0.009488	0.013	0.007738	0.004246	0.042301
Chlamydia trachomatis J 6276tet1 uid213394	0.040176	0.023893	0.010777	0.017636	0.011141	0.034489	0.019965	0.020087	0.016542	0.016666	0.009257	0.00829	0.011079	0.010308	0.008573	0.002596	0.001601	0.020774	0.009928	0.000889	0.032151	0.030799	0.017581	0.019701	0.009434	0.033358	0.012176	0.006797	0.000479	0.010109	0.006029	0.009658	0.026955	0.016128	0.006838	0.014832	0.014751	0.022932	0.012263	0.010255	0.009555	0.023852	0.005911	0.004294	0.009484	0.012932	0.007913	0.004362	0.042083
Chlamydia trachomatis K SotonK1 uid196782	0.040038	0.024063	0.010723	0.017375	0.011158	0.034898	0.019862	0.020045	0.016747	0.01684	0.009082	0.008229	0.011142	0.010396	0.008393	0.002477	0.001577	0.020702	0.009877	0.000868	0.032482	0.030626	0.017542	0.019756	0.009502	0.033639	0.012232	0.006791	0.000413	0.0102	0.006012	0.009534	0.02714	0.016254	0.006726	0.014722	0.014847	0.022804	0.012168	0.009979	0.009591	0.024175	0.005701	0.004079	0.009505	0.013107	0.007678	0.004246	0.042297
Chlamydia trachomatis L1 115 uid196784	0.04008	0.024201	0.010633	0.017435	0.011163	0.034956	0.019768	0.01998	0.01676	0.016817	0.009071	0.008168	0.011122	0.010418	0.008518	0.002465	0.001575	0.02072	0.009862	0.000887	0.032455	0.030572	0.01748	0.019691	0.009479	0.033641	0.012327	0.006795	0.000395	0.010173	0.006049	0.009592	0.0271	0.016245	0.006657	0.014657	0.014802	0.02277	0.012179	0.010042	0.009582	0.024246	0.005654	0.004147	0.009563	0.013131	0.007705	0.004227	0.042285
Chlamydia trachomatis L1 224 uid196785	0.040095	0.024194	0.010636	0.017441	0.011163	0.034962	0.019781	0.01999	0.01674	0.016804	0.009064	0.008161	0.011131	0.010395	0.008505	0.002469	0.001572	0.020729	0.009858	0.00089	0.032465	0.030581	0.017489	0.019691	0.009473	0.033612	0.012324	0.006795	0.000399	0.01017	0.006049	0.009598	0.0271	0.016248	0.006663	0.014673	0.014799	0.022793	0.012189	0.010038	0.009582	0.024252	0.005651	0.004143	0.009572	0.01313	0.007711	0.004227	0.042288
Chlamydia trachomatis L1 440 LN uid196783	0.040069	0.024199	0.01064	0.017427	0.01116	0.034942	0.01976	0.019997	0.01675	0.016824	0.009069	0.008179	0.011134	0.010421	0.008548	0.002464	0.001587	0.02072	0.009869	0.000887	0.03242	0.030595	0.017479	0.019683	0.009506	0.033654	0.012333	0.006804	0.000411	0.010183	0.006059	0.009592	0.027055	0.016268	0.006634	0.014662	0.014816	0.022773	0.012207	0.010016	0.009589	0.024219	0.005657	0.004131	0.00957	0.013139	0.007716	0.004228	0.042244
Chlamydia trachomatis L2 25667R uid196786	0.040083	0.024178	0.010641	0.017432	0.011161	0.034928	0.019779	0.019985	0.016763	0.016837	0.009081	0.008152	0.011133	0.010406	0.008489	0.002454	0.001572	0.020712	0.009866	0.000891	0.032446	0.030587	0.01748	0.019657	0.009483	0.033616	0.012335	0.006811	0.000399	0.010184	0.006049	0.009592	0.027095	0.016252	0.006666	0.014666	0.014795	0.022792	0.01219	0.010055	0.009586	0.024265	0.005656	0.004132	0.00956	0.013139	0.007714	0.004222	0.042269
Chlamydia trachomatis L2 434 Bu f uid198644	0.04011	0.02421	0.010658	0.017477	0.011157	0.034808	0.019809	0.020103	0.016762	0.0168	0.009074	0.008125	0.011182	0.010387	0.008493	0.00252	0.001613	0.020754	0.009879	0.000923	0.032412	0.030841	0.01758	0.019742	0.009505	0.033591	0.012335	0.006774	0.000444	0.010134	0.006053	0.00963	0.027085	0.016216	0.006659	0.014628	0.014814	0.02283	0.012226	0.010045	0.009563	0.024223	0.005717	0.004127	0.009531	0.01307	0.00772	0.004197	0.042189
Chlamydia trachomatis L2 434 Bu i uid198643	0.040101	0.024216	0.010659	0.017482	0.011148	0.034802	0.019811	0.020099	0.016764	0.016805	0.009075	0.00812	0.01118	0.010385	0.0085	0.00252	0.001613	0.020757	0.009883	0.000917	0.032416	0.030844	0.017575	0.019747	0.0095	0.033601	0.01234	0.006775	0.000447	0.01012	0.006053	0.009631	0.027081	0.016221	0.00666	0.014633	0.014806	0.022823	0.012221	0.010043	0.009564	0.024219	0.005715	0.004127	0.009532	0.013077	0.007721	0.004204	0.04219
Chlamydia trachomatis L2b 795 uid196791	0.040086	0.024179	0.010635	0.017418	0.011136	0.03493	0.019794	0.020003	0.016756	0.016824	0.00906	0.008166	0.011133	0.01041	0.008497	0.00245	0.001579	0.020707	0.009866	0.000884	0.032425	0.030635	0.017492	0.019694	0.009497	0.033634	0.012316	0.00679	0.000399	0.010175	0.006041	0.0096	0.027079	0.01628	0.006658	0.01466	0.014795	0.022774	0.012194	0.010043	0.009596	0.024243	0.005639	0.004134	0.009571	0.013142	0.007729	0.004231	0.042279
Chlamydia trachomatis L2b 8200 07 uid196787	0.040092	0.024175	0.010646	0.017427	0.011148	0.034931	0.019799	0.020001	0.016759	0.016823	0.009069	0.008172	0.011141	0.010409	0.008497	0.002465	0.001578	0.020698	0.009869	0.000884	0.032437	0.030635	0.017488	0.019696	0.00949	0.033633	0.012321	0.006793	0.000398	0.010171	0.006048	0.009599	0.027093	0.016257	0.006652	0.014657	0.014798	0.022781	0.012192	0.010049	0.009599	0.024233	0.005637	0.004129	0.00957	0.01314	0.007716	0.004229	0.04228
Chlamydia trachomatis L2b Ams1 uid196792	0.040091	0.024175	0.010646	0.017427	0.011148	0.034931	0.019798	0.020001	0.016755	0.016823	0.009068	0.008172	0.011141	0.010408	0.008496	0.002465	0.001578	0.020698	0.009869	0.000884	0.032437	0.030637	0.017488	0.019699	0.009489	0.033629	0.01232	0.006787	0.000398	0.010171	0.006048	0.009599	0.027093	0.016257	0.006652	0.01466	0.014798	0.02278	0.012192	0.010049	0.009602	0.024226	0.005643	0.004129	0.009573	0.01314	0.007716	0.004232	0.04228
Chlamydia trachomatis L2b Ams2 uid196793	0.040123	0.024156	0.010654	0.017473	0.011166	0.034946	0.019799	0.020038	0.016778	0.016836	0.009087	0.00818	0.011147	0.010407	0.008489	0.002465	0.001596	0.020662	0.009869	0.00093	0.032394	0.030586	0.017518	0.019716	0.009509	0.033617	0.012315	0.006812	0.000431	0.010159	0.006062	0.009547	0.027056	0.01624	0.006638	0.014651	0.014815	0.022782	0.012202	0.010059	0.009608	0.02423	0.005654	0.004135	0.009576	0.013135	0.007694	0.004244	0.042257
Chlamydia trachomatis L2b Ams3 uid196794	0.040097	0.024156	0.010646	0.01743	0.01115	0.034937	0.019799	0.020002	0.016761	0.016819	0.009073	0.008173	0.011141	0.010398	0.008491	0.002456	0.001579	0.020693	0.009864	0.000884	0.032438	0.030635	0.017488	0.019696	0.009491	0.033634	0.012314	0.006791	0.000402	0.010173	0.006045	0.009601	0.027101	0.016266	0.006655	0.014655	0.014796	0.022777	0.012189	0.010054	0.009594	0.024236	0.005639	0.004128	0.009565	0.013131	0.00772	0.004234	0.042287
Chlamydia trachomatis L2b Ams4 uid196795	0.04008	0.024169	0.010633	0.017419	0.011138	0.034931	0.019791	0.02	0.016753	0.016821	0.009068	0.008168	0.011144	0.010415	0.008502	0.002456	0.001578	0.020714	0.009868	0.000884	0.032414	0.030633	0.017496	0.019685	0.009508	0.033639	0.012327	0.006782	0.000402	0.01018	0.006043	0.009601	0.027081	0.016281	0.006657	0.014648	0.014799	0.022774	0.012195	0.010045	0.009595	0.02424	0.005638	0.004134	0.009566	0.01315	0.007734	0.00423	0.042292
Chlamydia trachomatis L2b Ams5 uid196796	0.040082	0.024167	0.010644	0.017428	0.011142	0.034923	0.0198	0.019996	0.01676	0.016824	0.009069	0.008172	0.011145	0.010412	0.0085	0.002462	0.001578	0.020693	0.009863	0.000884	0.032433	0.030598	0.017486	0.019697	0.009506	0.033644	0.012328	0.006794	0.000399	0.010171	0.006048	0.009596	0.027092	0.016277	0.006659	0.014661	0.014796	0.022766	0.012193	0.010049	0.009599	0.024244	0.005637	0.004136	0.009574	0.013134	0.007726	0.004232	0.042276
Chlamydia trachomatis L2b Canada1 uid196798	0.039968	0.023977	0.010761	0.017758	0.011395	0.034824	0.019827	0.020068	0.016703	0.016703	0.009033	0.008213	0.011256	0.010391	0.008557	0.00258	0.001802	0.020618	0.009783	0.001184	0.032399	0.030523	0.017539	0.019801	0.0096	0.03346	0.012373	0.006862	0.000611	0.010198	0.006193	0.009699	0.026888	0.016159	0.006656	0.014779	0.014885	0.02288	0.012408	0.010208	0.009632	0.024015	0.005659	0.004166	0.009596	0.013074	0.007714	0.004272	0.041902
Chlamydia trachomatis L2b Canada2 uid196799	0.040083	0.024171	0.010644	0.017428	0.011142	0.034934	0.019791	0.020003	0.016754	0.016815	0.00906	0.008163	0.011149	0.010403	0.008501	0.002459	0.001581	0.0207	0.00987	0.000887	0.032443	0.030647	0.017483	0.019694	0.009503	0.033639	0.012309	0.006794	0.000399	0.010172	0.006039	0.0096	0.027086	0.016278	0.006659	0.014665	0.01479	0.022776	0.012196	0.01004	0.009596	0.024238	0.005634	0.004136	0.009574	0.013144	0.007726	0.004233	0.042274
Chlamydia trachomatis L2b CV204 uid196790	0.040039	0.02417	0.010647	0.017399	0.011145	0.034948	0.019793	0.019973	0.016782	0.016836	0.009053	0.008169	0.011245	0.010448	0.008535	0.002552	0.001633	0.020706	0.009856	0.0009	0.032371	0.030677	0.017521	0.019671	0.009525	0.033592	0.012366	0.006787	0.000469	0.010216	0.006122	0.009647	0.027036	0.01621	0.006659	0.014612	0.01478	0.022756	0.012193	0.01002	0.009599	0.02416	0.005656	0.00413	0.009577	0.013137	0.007751	0.004229	0.042266
Chlamydia trachomatis L2b UCH 1 proctitis uid61635	0.040141	0.024203	0.010647	0.01752	0.011169	0.034896	0.019815	0.020001	0.016786	0.016855	0.009145	0.008153	0.011133	0.0104	0.008453	0.002439	0.001584	0.02076	0.009845	0.000854	0.032431	0.030648	0.017549	0.019649	0.009477	0.033527	0.012326	0.006774	0.000404	0.010149	0.006067	0.009598	0.027137	0.016219	0.006651	0.014553	0.014856	0.022853	0.012209	0.010067	0.009578	0.024239	0.005663	0.004137	0.009513	0.013079	0.007749	0.004215	0.042287
Chlamydia trachomatis L2b UCH 2 uid196788	0.040092	0.024175	0.010646	0.017427	0.011151	0.034931	0.019799	0.020001	0.016759	0.016823	0.009069	0.008172	0.011141	0.010409	0.008497	0.002465	0.001578	0.020698	0.009869	0.000884	0.032437	0.030638	0.017488	0.019696	0.00949	0.03363	0.012321	0.006793	0.000398	0.010171	0.006048	0.009599	0.027093	0.016257	0.006652	0.014657	0.014798	0.022781	0.012192	0.010049	0.009599	0.024233	0.005637	0.004129	0.00957	0.01314	0.007716	0.004229	0.04228
Chlamydia trachomatis L2c uid68843	0.040187	0.024158	0.010698	0.017531	0.011088	0.034866	0.019778	0.019855	0.016777	0.016803	0.009083	0.008139	0.011152	0.010411	0.008506	0.002475	0.00167	0.020735	0.009834	0.000935	0.032458	0.03093	0.017573	0.019823	0.009544	0.033702	0.0123	0.006749	0.000471	0.010089	0.006027	0.009567	0.027191	0.01619	0.00663	0.014685	0.014824	0.022866	0.01219	0.010008	0.009492	0.0242	0.005689	0.004132	0.009544	0.013077	0.00771	0.004213	0.042273
Chlamydia trachomatis L3 404 LN uid196797	0.040066	0.02419	0.010644	0.017425	0.011158	0.03493	0.019768	0.019977	0.01675	0.016827	0.009072	0.008163	0.011129	0.010413	0.00852	0.002436	0.001572	0.020729	0.00986	0.000881	0.032417	0.030585	0.017467	0.019691	0.009474	0.033635	0.012325	0.006807	0.000402	0.010175	0.006048	0.009587	0.027092	0.016258	0.006662	0.014645	0.014835	0.022773	0.012183	0.01004	0.009577	0.024241	0.005663	0.004155	0.009558	0.013135	0.007707	0.004223	0.042287
Chlamydia trachomatis RC F 69 uid213385	0.040245	0.023968	0.010652	0.017601	0.011187	0.034903	0.019873	0.020144	0.01667	0.016715	0.008941	0.008077	0.011158	0.010359	0.008467	0.002487	0.001605	0.020749	0.009827	0.000909	0.032519	0.03096	0.017653	0.01977	0.009469	0.033614	0.012256	0.006769	0.000461	0.010181	0.006102	0.009576	0.027084	0.016203	0.006698	0.014541	0.014779	0.022879	0.012221	0.010075	0.009469	0.024077	0.005754	0.004063	0.009476	0.013062	0.007726	0.004256	0.042259
Chlamydia trachomatis RC F s 342 uid213391	0.040256	0.023745	0.010868	0.017739	0.011094	0.034569	0.019952	0.020043	0.016595	0.016601	0.009216	0.008269	0.011028	0.010313	0.008573	0.002539	0.001596	0.020739	0.009912	0.00089	0.032203	0.030924	0.017658	0.019727	0.009429	0.033294	0.012156	0.006821	0.000492	0.010009	0.006015	0.009624	0.02693	0.016134	0.006849	0.014774	0.014677	0.022849	0.012241	0.010276	0.009573	0.023855	0.005884	0.004244	0.009473	0.012934	0.007975	0.004398	0.042096
Chlamydia trachomatis RC F s 852 uid213387	0.040325	0.023758	0.010876	0.017742	0.011108	0.034607	0.019976	0.020076	0.016573	0.016608	0.009172	0.008254	0.010992	0.010265	0.00857	0.00256	0.001598	0.020766	0.009886	0.000893	0.032219	0.030887	0.017661	0.0197	0.009435	0.033275	0.012193	0.006812	0.000495	0.010015	0.006035	0.00962	0.026967	0.016128	0.006837	0.014759	0.014737	0.022843	0.01228	0.010259	0.009576	0.023868	0.005922	0.004249	0.009429	0.012945	0.007972	0.004396	0.042121
Chlamydia trachomatis RC J 943 uid213388	0.040124	0.024071	0.010538	0.017465	0.011204	0.034812	0.019871	0.020077	0.016645	0.016716	0.009011	0.008094	0.011156	0.010339	0.008454	0.002553	0.001611	0.020774	0.009815	0.000917	0.032477	0.030924	0.017571	0.019816	0.009429	0.033657	0.012259	0.006782	0.000447	0.010236	0.006072	0.009622	0.027032	0.016211	0.006708	0.014571	0.014793	0.022906	0.012262	0.010046	0.009516	0.024135	0.005721	0.004116	0.009529	0.013101	0.007731	0.004226	0.042234
Chlamydia trachomatis RC J 953 uid213389	0.040055	0.024075	0.010598	0.017488	0.011219	0.03484	0.019849	0.020148	0.016644	0.016718	0.008993	0.008088	0.01119	0.010369	0.008456	0.002509	0.001607	0.02077	0.009831	0.000908	0.032498	0.030942	0.0176	0.019794	0.009396	0.033658	0.012237	0.00679	0.000445	0.01023	0.006088	0.009606	0.027035	0.016173	0.006729	0.014614	0.014801	0.022935	0.012247	0.010053	0.009509	0.024069	0.005737	0.004088	0.009512	0.013068	0.007663	0.004197	0.042194
Chlamydia trachomatis RC J 966 uid213393	0.04014	0.024111	0.010556	0.017509	0.011216	0.034867	0.019809	0.020131	0.016656	0.016682	0.009018	0.008088	0.011167	0.01037	0.008462	0.002538	0.001609	0.020758	0.009835	0.000917	0.03245	0.030893	0.017602	0.019829	0.009411	0.033615	0.012261	0.006801	0.00045	0.010231	0.006068	0.00962	0.027048	0.016219	0.006705	0.014588	0.014797	0.022895	0.012239	0.010054	0.009511	0.024117	0.005724	0.004118	0.009498	0.013101	0.007722	0.004224	0.042225
Chlamydia trachomatis RC J 971 uid213395	0.040097	0.024039	0.010645	0.017547	0.011187	0.034881	0.019802	0.020182	0.016629	0.016709	0.008986	0.008077	0.011193	0.010381	0.008432	0.002536	0.001611	0.020769	0.009843	0.000909	0.032526	0.030912	0.017598	0.019818	0.009398	0.033624	0.012231	0.006782	0.000458	0.010236	0.006073	0.009614	0.027	0.016203	0.006708	0.014602	0.014811	0.022905	0.012221	0.010049	0.009518	0.0241	0.005748	0.004079	0.009524	0.013081	0.007681	0.004211	0.042214
Chlamydia trachomatis RC J s 122 uid213392	0.040145	0.023925	0.010824	0.017794	0.011091	0.034533	0.019964	0.020193	0.016611	0.016598	0.009249	0.00825	0.011062	0.010216	0.008657	0.002599	0.001588	0.020747	0.009926	0.000897	0.032077	0.030791	0.017546	0.019719	0.009398	0.033196	0.012185	0.006767	0.000487	0.01007	0.00601	0.009643	0.026964	0.016111	0.006799	0.014801	0.014632	0.022901	0.012208	0.01027	0.00958	0.023827	0.005883	0.004257	0.009516	0.012978	0.007951	0.004343	0.041962
Chlamydia trachomatis RC L2 55 uid213396	0.040185	0.024101	0.010581	0.017529	0.011189	0.034881	0.019814	0.020091	0.016625	0.016705	0.008998	0.0081	0.011173	0.010369	0.008451	0.002533	0.001612	0.020792	0.00986	0.000914	0.032526	0.030868	0.017655	0.019759	0.009403	0.033613	0.012271	0.006787	0.000454	0.010208	0.006066	0.009613	0.027007	0.016232	0.006678	0.014594	0.014787	0.022874	0.012248	0.010092	0.009503	0.024168	0.005699	0.004122	0.009532	0.013098	0.007723	0.004209	0.042235
Chlamydia trachomatis RC L2 s 3 uid213390	0.040234	0.024075	0.010624	0.017619	0.011154	0.034935	0.019849	0.020085	0.016598	0.016734	0.009012	0.008136	0.01117	0.010304	0.008446	0.00253	0.00159	0.020844	0.009907	0.000908	0.032547	0.030906	0.017691	0.019704	0.009406	0.033539	0.012236	0.006782	0.000469	0.010143	0.005984	0.009577	0.027029	0.016259	0.006698	0.014569	0.01477	0.022835	0.012211	0.010039	0.009532	0.02415	0.005697	0.004097	0.009551	0.013099	0.007771	0.004236	0.042263
Chlamydia trachomatis RC L2 s 46 uid213386	0.0402	0.024107	0.010618	0.017542	0.011186	0.034899	0.019854	0.02007	0.0166	0.016729	0.008977	0.008081	0.011125	0.010357	0.008445	0.002547	0.001599	0.020834	0.009864	0.000919	0.03252	0.030969	0.017632	0.019737	0.009374	0.033609	0.012269	0.006788	0.000461	0.010202	0.006056	0.009612	0.026983	0.016232	0.006688	0.014604	0.014801	0.022872	0.012286	0.010073	0.009512	0.024168	0.005701	0.004118	0.009522	0.013098	0.007739	0.004234	0.042216
Chlamydia trachomatis Sweden2 uid161995	0.04001	0.024055	0.010771	0.017484	0.011164	0.034904	0.019893	0.019984	0.016812	0.016854	0.009051	0.008271	0.011216	0.010401	0.008434	0.002461	0.001561	0.020656	0.009846	0.000863	0.03243	0.03058	0.017608	0.019851	0.009557	0.033573	0.012209	0.006791	0.000412	0.010138	0.006025	0.00955	0.027132	0.016241	0.00672	0.014621	0.014813	0.022834	0.012121	0.010005	0.009547	0.024133	0.005697	0.004064	0.009486	0.01303	0.00769	0.004266	0.042269
Chlamydia trachomatis uid196771	0.039906	0.024146	0.010717	0.017382	0.01121	0.034892	0.019803	0.019944	0.016813	0.017017	0.009086	0.008254	0.011165	0.010352	0.008398	0.002517	0.001589	0.020711	0.009933	0.000886	0.032477	0.030568	0.017571	0.019704	0.009534	0.033734	0.012278	0.006831	0.000397	0.010208	0.006003	0.009578	0.02712	0.016298	0.0067	0.014657	0.01483	0.022752	0.012099	0.009911	0.009636	0.024188	0.005721	0.004106	0.00953	0.013112	0.00766	0.004196	0.04226
Chlamydia trachomatis uid196776	0.039988	0.024087	0.010771	0.017367	0.011143	0.0349	0.019859	0.02	0.016775	0.016867	0.009059	0.008237	0.011184	0.010413	0.008403	0.002496	0.001562	0.020688	0.009882	0.000874	0.032439	0.030669	0.017562	0.019744	0.009514	0.0336	0.012243	0.006813	0.000422	0.010186	0.006048	0.009549	0.027072	0.016218	0.006723	0.014691	0.014823	0.022743	0.01217	0.010003	0.009626	0.024205	0.005674	0.004061	0.009549	0.013059	0.007683	0.004234	0.042295
Chlamydia trachomatis uid196778	0.040027	0.024061	0.010781	0.017412	0.011136	0.0349	0.019841	0.019981	0.016784	0.016896	0.009011	0.008263	0.011175	0.010464	0.008394	0.002464	0.001565	0.020698	0.009869	0.000864	0.032449	0.030609	0.017517	0.019725	0.009523	0.033646	0.012276	0.006823	0.000438	0.010192	0.006055	0.009559	0.027063	0.016234	0.00672	0.014704	0.014836	0.022721	0.012183	0.009965	0.009616	0.024196	0.005661	0.004071	0.009514	0.01306	0.007715	0.004224	0.042279
Chlamydia trachomatis uid196781	0.039953	0.024083	0.010728	0.017378	0.01114	0.034846	0.019855	0.019983	0.01676	0.016911	0.009067	0.008238	0.011182	0.010424	0.008414	0.002515	0.001581	0.02069	0.009896	0.000877	0.032407	0.030595	0.017567	0.019737	0.009585	0.033665	0.012277	0.006823	0.000403	0.010209	0.006007	0.009534	0.02712	0.016296	0.00673	0.014715	0.014853	0.022751	0.012155	0.009995	0.009611	0.024179	0.005706	0.004084	0.009518	0.013102	0.007681	0.004224	0.042286
Chlamydia trachomatis uid196789	0.040079	0.024153	0.010637	0.017424	0.011132	0.034908	0.019785	0.019988	0.016765	0.016816	0.009059	0.008175	0.011202	0.010418	0.008516	0.00249	0.001613	0.020711	0.009878	0.0009	0.032398	0.030653	0.01751	0.019692	0.009525	0.03361	0.012317	0.006806	0.000456	0.010177	0.006073	0.009608	0.027051	0.016257	0.006636	0.014654	0.014805	0.022806	0.012176	0.010026	0.009621	0.024217	0.005643	0.004129	0.009586	0.013124	0.007719	0.004229	0.042273
Chlamydia trachomatis uid196800	0.040055	0.024241	0.010641	0.017414	0.011155	0.034944	0.019772	0.019988	0.016771	0.016842	0.009067	0.008174	0.011133	0.010426	0.008546	0.002458	0.001578	0.020717	0.009883	0.000887	0.032438	0.030581	0.017475	0.019669	0.009491	0.033649	0.012344	0.006782	0.000395	0.010162	0.006053	0.009587	0.027082	0.016228	0.00666	0.014664	0.014799	0.022757	0.012193	0.010031	0.009594	0.024216	0.005648	0.004138	0.009555	0.013122	0.007711	0.004212	0.042282
Chlamydia trachomatis uid216090	0.040191	0.024152	0.010741	0.017523	0.011213	0.034806	0.01982	0.020091	0.016684	0.016856	0.009082	0.008173	0.01127	0.010384	0.00845	0.002635	0.001614	0.020735	0.00987	0.000995	0.032433	0.030931	0.017603	0.019915	0.009608	0.033626	0.012253	0.006744	0.000475	0.010144	0.006074	0.009554	0.027042	0.016215	0.00669	0.014658	0.014843	0.022901	0.012224	0.010081	0.009624	0.024021	0.005732	0.004093	0.009452	0.012945	0.00764	0.004249	0.042099
Chlamydophila abortus S26 3 uid57963	0.043176	0.025855	0.013006	0.018033	0.016588	0.035228	0.019574	0.020032	0.018784	0.016139	0.009899	0.00858	0.010917	0.012165	0.007589	0.003666	0.00167	0.022366	0.010866	0.000748	0.037796	0.030979	0.015534	0.01624	0.011366	0.030476	0.011207	0.006569	0.000368	0.010671	0.005306	0.009579	0.027887	0.01759	0.00802	0.012054	0.014017	0.021537	0.012099	0.008804	0.008232	0.02265	0.008358	0.004614	0.005458	0.0149	0.006862	0.002822	0.044532
Chlamydophila caviae GPIC uid57783	0.043216	0.028194	0.012403	0.019259	0.016286	0.036394	0.018339	0.020034	0.019419	0.015966	0.009504	0.008034	0.011843	0.011094	0.008726	0.003737	0.001804	0.022573	0.009798	0.000715	0.038107	0.030422	0.015834	0.014925	0.01204	0.032037	0.01027	0.005756	0.000335	0.010327	0.00575	0.009498	0.026479	0.017507	0.006156	0.012606	0.015683	0.024557	0.010496	0.006347	0.008669	0.023434	0.007603	0.003554	0.005009	0.014822	0.007019	0.002236	0.043991
Chlamydophila felis Fe C 56 uid57971	0.043541	0.028265	0.013248	0.018854	0.017309	0.03798	0.016331	0.019664	0.018792	0.016646	0.00989	0.007431	0.011855	0.011376	0.008443	0.00401	0.001672	0.022055	0.010496	0.000812	0.035007	0.031654	0.01527	0.016167	0.011503	0.032997	0.011841	0.00621	0.00035	0.010011	0.006052	0.009512	0.026877	0.016068	0.00729	0.012343	0.016785	0.025197	0.009498	0.007566	0.008849	0.020352	0.009943	0.004007	0.006221	0.013412	0.007106	0.00231	0.043859
Chlamydophila pecorum E58 uid66295	0.038813	0.022711	0.013564	0.023404	0.013953	0.034034	0.019787	0.019274	0.018339	0.014716	0.010079	0.008122	0.010044	0.010179	0.009852	0.005578	0.001701	0.023451	0.009103	0.000817	0.031018	0.034824	0.013404	0.016573	0.01058	0.033621	0.012747	0.004678	0.000395	0.010288	0.005698	0.009578	0.025777	0.017891	0.00722	0.015683	0.014283	0.031057	0.014701	0.007594	0.009103	0.023398	0.009298	0.003216	0.00574	0.011807	0.008278	0.003358	0.039273
Chlamydophila pneumoniae AR39 uid57809	0.040525	0.025033	0.01289	0.021115	0.013928	0.034378	0.020746	0.018909	0.0172	0.017397	0.010273	0.007628	0.011489	0.011743	0.00897	0.004827	0.002141	0.022577	0.009879	0.00155	0.030701	0.031199	0.016625	0.016206	0.011793	0.03034	0.011223	0.006415	0.001051	0.010339	0.006029	0.010188	0.025948	0.015913	0.007543	0.013868	0.015886	0.025871	0.016047	0.009074	0.008789	0.023059	0.00918	0.00322	0.006823	0.013287	0.006815	0.003132	0.041637
Chlamydophila pneumoniae CWL029 uid57811	0.040442	0.025251	0.012769	0.02075	0.01359	0.034828	0.020761	0.018811	0.01724	0.017541	0.010274	0.007598	0.010743	0.011745	0.00874	0.004392	0.001571	0.0227	0.009775	0.000868	0.03103	0.030971	0.016246	0.015805	0.011667	0.030637	0.011006	0.006309	0.000441	0.010196	0.005693	0.010071	0.026362	0.016185	0.007576	0.01383	0.015797	0.025831	0.015867	0.008784	0.008787	0.023465	0.009312	0.003198	0.006711	0.013573	0.006892	0.003109	0.042387
Chlamydophila pneumoniae J138 uid57829	0.040359	0.025576	0.012927	0.020731	0.0137	0.034482	0.020766	0.018624	0.017434	0.017774	0.01036	0.007641	0.010782	0.011805	0.008865	0.00444	0.001571	0.022731	0.009834	0.000871	0.030867	0.03102	0.016315	0.015741	0.011713	0.030614	0.011081	0.006345	0.000465	0.010169	0.005724	0.010044	0.026297	0.016171	0.007592	0.013923	0.015744	0.025793	0.015943	0.008814	0.008803	0.023273	0.009255	0.00319	0.00671	0.01343	0.006857	0.003108	0.042112
Chlamydophila pneumoniae LPCoLN uid159529	0.040786	0.025573	0.012959	0.020962	0.013665	0.034484	0.020646	0.018757	0.017543	0.01767	0.010295	0.007605	0.010827	0.011805	0.008813	0.004295	0.001627	0.022619	0.009843	0.000892	0.030992	0.03117	0.01643	0.015865	0.011743	0.03063	0.011005	0.006238	0.000446	0.010059	0.005543	0.010103	0.026205	0.016097	0.007573	0.013927	0.015886	0.025854	0.015889	0.008651	0.008797	0.0233	0.009303	0.003173	0.006646	0.013403	0.006781	0.003092	0.042565
Chlamydophila pneumoniae TW 183 uid57997	0.040447	0.025748	0.012923	0.020743	0.013795	0.034552	0.020754	0.018561	0.017478	0.017759	0.010364	0.007629	0.010995	0.011883	0.008863	0.004555	0.001649	0.022764	0.009873	0.000888	0.030893	0.031196	0.01647	0.015956	0.011747	0.030712	0.011089	0.006326	0.000477	0.010225	0.005774	0.010012	0.02616	0.016107	0.007561	0.013827	0.015753	0.025891	0.015877	0.008798	0.008752	0.023183	0.009242	0.003204	0.006697	0.013418	0.006781	0.003071	0.041936
Chlamydophila psittaci 01DC11 uid159527	0.043469	0.027141	0.013414	0.018206	0.017366	0.036091	0.018522	0.019548	0.019267	0.017028	0.009297	0.007487	0.011278	0.012457	0.007722	0.003584	0.001689	0.022545	0.010518	0.00074	0.038245	0.030783	0.015439	0.01576	0.012683	0.031833	0.010378	0.005833	0.000364	0.010834	0.005073	0.00952	0.02797	0.017048	0.007459	0.011639	0.014693	0.022748	0.01129	0.007321	0.008815	0.023333	0.007378	0.003843	0.005635	0.015052	0.006498	0.002495	0.045121
Chlamydophila psittaci 02DC15 uid159521	0.043488	0.027142	0.013422	0.018108	0.01732	0.036155	0.018543	0.019554	0.019308	0.016981	0.009326	0.007475	0.01128	0.012346	0.007683	0.003562	0.001701	0.022505	0.010538	0.000756	0.038326	0.030837	0.01545	0.015711	0.012648	0.031849	0.010338	0.005799	0.000362	0.010894	0.005127	0.009492	0.027962	0.017056	0.007454	0.011622	0.014685	0.022821	0.011315	0.007318	0.008828	0.023409	0.00735	0.003849	0.005608	0.01505	0.006509	0.002463	0.04518
Chlamydophila psittaci 08DC60 uid159525	0.043507	0.02699	0.01326	0.018245	0.017444	0.036187	0.018505	0.019629	0.019155	0.016907	0.009234	0.007474	0.011318	0.012387	0.007656	0.003615	0.001696	0.022566	0.010497	0.000743	0.038369	0.030852	0.015367	0.015838	0.012656	0.031791	0.010312	0.005821	0.000367	0.01087	0.005075	0.009497	0.027982	0.017089	0.007462	0.011627	0.014679	0.022806	0.011242	0.007347	0.008818	0.02336	0.007367	0.003844	0.005641	0.015109	0.006523	0.002506	0.04525
Chlamydophila psittaci 6BC uid159845	0.043619	0.027165	0.013447	0.018279	0.017432	0.036014	0.018454	0.019638	0.019223	0.017006	0.009338	0.00747	0.011338	0.012405	0.007699	0.003602	0.001728	0.022705	0.010551	0.000764	0.038283	0.030902	0.015524	0.015884	0.012657	0.031643	0.010363	0.005816	0.000375	0.010918	0.005064	0.00949	0.027924	0.017043	0.007467	0.011607	0.014803	0.022791	0.011324	0.00733	0.008772	0.023314	0.00737	0.003842	0.005625	0.015012	0.006457	0.002518	0.044964
Chlamydophila psittaci 6BC uid63621	0.043518	0.027255	0.013633	0.018175	0.017299	0.035891	0.018484	0.019365	0.019419	0.017205	0.009452	0.007509	0.011204	0.01248	0.007801	0.003526	0.001686	0.022527	0.01054	0.00073	0.038072	0.0305	0.015536	0.015613	0.012749	0.031905	0.010428	0.005841	0.000352	0.010806	0.005022	0.009507	0.027996	0.016998	0.007438	0.011564	0.014741	0.022619	0.011315	0.007283	0.008805	0.023314	0.007372	0.003878	0.005606	0.014958	0.006436	0.002467	0.045112
Chlamydophila psittaci C19 98 uid159523	0.043475	0.027112	0.013365	0.018241	0.017387	0.036146	0.018489	0.019593	0.019245	0.016982	0.009279	0.007456	0.011289	0.01243	0.007666	0.003603	0.001688	0.022589	0.010504	0.000748	0.038271	0.030807	0.015423	0.015789	0.012669	0.031813	0.01034	0.005828	0.000365	0.010857	0.005064	0.009517	0.028006	0.01708	0.00745	0.011616	0.014693	0.022761	0.011269	0.007321	0.008824	0.023357	0.00737	0.003836	0.005641	0.015078	0.00651	0.00251	0.04516
Chlamydophila psittaci CP3 uid175578	0.043437	0.02711	0.013559	0.018171	0.017387	0.035885	0.018509	0.019609	0.019227	0.017025	0.009255	0.007549	0.011472	0.012543	0.00773	0.003647	0.001858	0.022722	0.010561	0.000916	0.038107	0.030908	0.015615	0.015879	0.012614	0.031931	0.010383	0.005818	0.000431	0.010906	0.005105	0.009507	0.02775	0.016999	0.007503	0.011678	0.014739	0.02265	0.01144	0.007342	0.008758	0.023222	0.007437	0.003816	0.005608	0.014912	0.006386	0.002515	0.044921
Chlamydophila psittaci Mat116 uid189026	0.043115	0.026897	0.01322	0.01847	0.017379	0.036078	0.018482	0.019771	0.019007	0.017003	0.009121	0.007532	0.011391	0.012423	0.007704	0.003628	0.001713	0.022581	0.010458	0.000863	0.038304	0.030594	0.015494	0.015903	0.012435	0.031628	0.010327	0.00578	0.000439	0.010837	0.005063	0.009462	0.027837	0.017142	0.007485	0.011732	0.014658	0.022792	0.011308	0.007467	0.008795	0.023379	0.007274	0.003839	0.005629	0.015079	0.006527	0.002555	0.045195
Chlamydophila psittaci NJ1 uid175579	0.043651	0.027416	0.013356	0.018211	0.017458	0.036139	0.018535	0.019552	0.01928	0.01702	0.009222	0.007397	0.011425	0.012399	0.007689	0.003618	0.001788	0.022632	0.010499	0.000822	0.038377	0.031006	0.015602	0.015776	0.012625	0.031991	0.010368	0.005801	0.000381	0.010815	0.005096	0.009485	0.02794	0.017051	0.007383	0.011594	0.014897	0.022772	0.011282	0.007165	0.008892	0.023251	0.007251	0.003776	0.005609	0.014946	0.006409	0.002444	0.045123
Chlamydophila psittaci RD1 uid162063	0.04334	0.026918	0.013241	0.018354	0.01745	0.036284	0.018366	0.019791	0.019081	0.016864	0.009221	0.00746	0.01135	0.012322	0.007657	0.003631	0.001688	0.022657	0.010538	0.000736	0.038451	0.03103	0.015344	0.015945	0.012605	0.031642	0.01034	0.005852	0.000356	0.010838	0.005098	0.009527	0.028002	0.017034	0.007484	0.011689	0.014667	0.022795	0.011147	0.007363	0.008859	0.023399	0.007354	0.003823	0.005719	0.015176	0.006503	0.002556	0.045122
Chlorobaculum parvum NCIB 8327 uid59185	0.022624	0.0099	0.024385	0.028923	0.002961	0.017183	0.042545	0.026762	0.004406	0.004352	0.026985	0.015426	0.003775	0.004114	0.017773	0.004802	0.001042	0.009733	0.018805	0.000276	0.001928	0.01322	0.029886	0.008761	0.006156	0.003843	0.01046	0.021312	0.001759	0.001984	0.008719	0.011039	0.005492	0.007352	0.013483	0.026828	0.001336	0.016874	0.033632	0.03744	0.004374	0.005543	0.010552	0.0238	0.004218	0.008152	0.025298	0.011411	0.030928
Chlorobium chlorochromatii CaD3 uid58375	0.034401	0.025808	0.018666	0.014953	0.008336	0.048274	0.007506	0.023368	0.015006	0.010251	0.022508	0.016663	0.003128	0.011686	0.01793	0.001303	0.001688	0.018442	0.012292	0.000432	0.020694	0.034441	0.006398	0.019262	0.012641	0.007178	0.006501	0.011094	0.00052	0.003794	0.005863	0.010082	0.027078	0.013048	0.008826	0.011027	0.004148	0.035528	0.010984	0.009634	0.013131	0.010509	0.009173	0.005473	0.004539	0.015393	0.01888	0.003248	0.037579
Chlorobium limicola DSM 245 uid58127	0.031109	0.015078	0.021186	0.01902	0.011025	0.020135	0.033239	0.02536	0.008753	0.005516	0.02395	0.013321	0.008413	0.006514	0.015409	0.00942	0.001124	0.016067	0.014438	0.00041	0.002936	0.020328	0.02349	0.007014	0.008715	0.006301	0.012846	0.016592	0.00153	0.003884	0.007376	0.010315	0.00518	0.012518	0.008535	0.025885	0.001183	0.028772	0.027821	0.033337	0.004012	0.008988	0.010584	0.018809	0.005256	0.010246	0.013282	0.012493	0.039612
Chlorobium luteolum DSM 273 uid58175	0.017929	0.007851	0.022496	0.024844	0.006193	0.012077	0.04182	0.027439	0.007024	0.004529	0.028377	0.012903	0.003664	0.004741	0.018722	0.009373	0.000811	0.009957	0.017504	0.00041	0.001074	0.010577	0.030456	0.00429	0.007705	0.004515	0.015369	0.015291	0.001743	0.00189	0.008034	0.01055	0.002709	0.009787	0.011357	0.026837	0.001419	0.022982	0.040337	0.032206	0.003506	0.006913	0.01548	0.019819	0.003471	0.008719	0.02258	0.016452	0.030554
Chlorobium phaeobacteroides BS1 uid58131	0.033902	0.015852	0.021252	0.023102	0.013331	0.021923	0.030265	0.025636	0.012579	0.006592	0.01964	0.01147	0.01077	0.008058	0.013869	0.010729	0.00115	0.0176	0.013853	0.000632	0.003739	0.023284	0.021255	0.009645	0.012374	0.008717	0.012519	0.010957	0.001477	0.005044	0.006111	0.010623	0.007011	0.013151	0.008302	0.024925	0.001843	0.029593	0.022815	0.031914	0.004075	0.011685	0.00896	0.016137	0.005292	0.010487	0.009711	0.009896	0.040751
Chlorobium phaeobacteroides DSM 266 uid58133	0.035448	0.018521	0.019558	0.019324	0.011473	0.026339	0.027879	0.024735	0.011463	0.006672	0.020939	0.012994	0.009626	0.008511	0.014997	0.008356	0.00123	0.01894	0.012027	0.000422	0.00507	0.026932	0.017418	0.010876	0.01185	0.007801	0.010973	0.013534	0.001364	0.004638	0.006806	0.010594	0.008642	0.013724	0.0078	0.024649	0.001622	0.034616	0.022403	0.027477	0.005673	0.01071	0.00906	0.015635	0.007668	0.009985	0.011209	0.010451	0.037825
Chlorobium phaeovibrioides DSM 265 uid58129	0.02583	0.012734	0.02021	0.020732	0.009615	0.025427	0.026337	0.027245	0.01144	0.007133	0.024619	0.009861	0.005949	0.0067	0.017506	0.008553	0.000913	0.013673	0.013994	0.000393	0.001413	0.018682	0.0235	0.005671	0.011982	0.006685	0.013659	0.011707	0.001626	0.002853	0.007237	0.010129	0.003867	0.011538	0.009269	0.026368	0.001201	0.033129	0.029034	0.031317	0.004924	0.009583	0.014825	0.014721	0.004195	0.01003	0.017218	0.013519	0.033821
Chlorobium tepidum TLS uid57897	0.022587	0.009558	0.024422	0.029864	0.003388	0.016576	0.042532	0.026717	0.004797	0.004143	0.026046	0.015036	0.00407	0.003908	0.017674	0.005351	0.001197	0.009369	0.018449	0.000323	0.001621	0.013527	0.02989	0.008853	0.005954	0.003829	0.0099	0.021447	0.002056	0.002199	0.009283	0.010849	0.00546	0.007304	0.014006	0.025826	0.001365	0.015996	0.036032	0.035489	0.005204	0.005061	0.010968	0.023947	0.004293	0.007643	0.026742	0.012442	0.029176
Chloroflexus aggregans DSM 9485 uid58621	0.008469	0.013306	0.014146	0.010409	0.003767	0.02394	0.031595	0.019771	0.008757	0.006631	0.026381	0.019365	0.000936	0.010914	0.012903	0.001051	0.000956	0.013222	0.013896	0.000834	0.010402	0.018905	0.01439	0.026992	0.005785	0.002712	0.003472	0.011863	0.00097	0.0042	0.004139	0.016015	0.019229	0.010204	0.01141	0.020904	0.00662	0.011856	0.027301	0.029064	0.012337	0.006914	0.011794	0.028973	0.008244	0.019723	0.028195	0.018279	0.027844
Chloroflexus aurantiacus J 10 fl uid57657	0.008113	0.014403	0.01284	0.009661	0.003387	0.026767	0.029106	0.019715	0.009844	0.006929	0.026733	0.016425	0.001333	0.011916	0.013196	0.00138	0.000788	0.012271	0.014775	0.000822	0.007479	0.018008	0.015893	0.01958	0.006582	0.003214	0.00364	0.010583	0.001123	0.00454	0.003618	0.015906	0.013914	0.009888	0.011296	0.02823	0.004928	0.010595	0.023347	0.046837	0.014045	0.007426	0.01205	0.025412	0.007345	0.018703	0.02861	0.018277	0.028566
Chloroflexus Y 400 fl uid59085	0.008073	0.014298	0.012746	0.009635	0.003496	0.026393	0.028805	0.019807	0.009881	0.006936	0.026602	0.016439	0.001443	0.011853	0.013326	0.001609	0.00082	0.012249	0.014691	0.000873	0.007426	0.01777	0.015771	0.019425	0.006702	0.003326	0.003907	0.010588	0.001213	0.004672	0.004028	0.015935	0.013843	0.010069	0.011562	0.028209	0.005003	0.010525	0.023264	0.046336	0.014145	0.007632	0.012378	0.025369	0.007409	0.018775	0.028806	0.018345	0.028214
Chloroherpeton thalassium ATCC 35110 uid59187	0.047984	0.024634	0.018323	0.017541	0.005781	0.042237	0.020691	0.02304	0.011412	0.007597	0.016039	0.017532	0.005467	0.006681	0.016571	0.001801	0.001787	0.021748	0.012854	0.000469	0.013605	0.034861	0.014582	0.026228	0.009635	0.008875	0.010054	0.016122	0.000593	0.002835	0.006134	0.009811	0.023715	0.012126	0.008129	0.012191	0.004733	0.024811	0.014174	0.015564	0.009619	0.007134	0.006115	0.01522	0.007118	0.006696	0.018576	0.00525	0.050097
Chromobacterium violaceum ATCC 12472 uid58001	0.007682	0.007853	0.020738	0.028128	0.003464	0.004927	0.035644	0.023933	0.001509	0.002237	0.027291	0.011307	0.001264	0.001755	0.023315	0.003456	0.000758	0.006691	0.018053	0.000406	0.000967	0.004661	0.029626	0.012891	0.001367	0.00182	0.014845	0.013172	0.001979	0.00105	0.009223	0.014628	0.008464	0.007699	0.014113	0.035281	0.001539	0.003004	0.00871	0.087778	0.002402	0.002907	0.012484	0.031628	0.002176	0.004138	0.043275	0.014166	0.021898
Chromohalobacter salexigens DSM 3043 uid62921	0.003987	0.007248	0.017087	0.020986	0.001759	0.00728	0.036522	0.024762	0.002847	0.002359	0.028452	0.018395	0.00094	0.004253	0.01757	0.001532	0.000477	0.009453	0.014418	0.000391	0.000995	0.005859	0.02847	0.013001	0.002218	0.001878	0.01099	0.01661	0.002122	0.001927	0.007594	0.014907	0.006945	0.01122	0.014214	0.030437	0.002031	0.004712	0.027548	0.064035	0.002711	0.00332	0.019435	0.023417	0.004123	0.014699	0.041126	0.012057	0.022771
Chroococcidiopsis thermalis PCC 7203 uid183002	0.029592	0.023545	0.015019	0.012815	0.007747	0.037429	0.019873	0.018283	0.014954	0.019172	0.011241	0.011231	0.007904	0.01344	0.012334	0.00283	0.001364	0.017246	0.013036	0.000976	0.032902	0.0284	0.010819	0.023024	0.008084	0.014554	0.006384	0.008261	0.000754	0.005481	0.004547	0.014508	0.037327	0.010058	0.00842	0.017533	0.015694	0.009406	0.013027	0.015427	0.01526	0.01385	0.011369	0.007097	0.010221	0.009747	0.017993	0.007661	0.043105
Chthonomonas calidirosea T49 uid208678	0.017191	0.011215	0.020832	0.016018	0.008044	0.018391	0.026256	0.020009	0.009197	0.006542	0.024065	0.01536	0.003892	0.005414	0.014578	0.003799	0.000989	0.016498	0.014619	0.001061	0.008556	0.020066	0.016747	0.015577	0.004123	0.008503	0.010724	0.009993	0.000732	0.004877	0.006745	0.014701	0.018728	0.014255	0.010687	0.02522	0.01123	0.024551	0.025968	0.024402	0.010542	0.014849	0.018001	0.01597	0.009279	0.015231	0.024433	0.009377	0.021795
Citrobacter koseri ATCC BAA 895 uid58143	0.029698	0.01492	0.022827	0.011355	0.004149	0.02698	0.0273	0.027483	0.005321	0.005494	0.023894	0.019537	0.002482	0.006243	0.018586	0.001845	0.001945	0.014679	0.012956	0.000349	0.01026	0.021339	0.018103	0.011584	0.006037	0.007458	0.010768	0.009435	0.001145	0.004191	0.007513	0.015005	0.011729	0.012366	0.010912	0.032966	0.003035	0.010225	0.011424	0.061003	0.00554	0.007064	0.00677	0.024956	0.003314	0.018639	0.024911	0.006416	0.034432
Citrobacter rodentium ICC168 uid43089	0.028502	0.014672	0.022998	0.013735	0.004721	0.025371	0.027621	0.026715	0.004558	0.005274	0.027284	0.016631	0.002589	0.005776	0.020202	0.002097	0.001812	0.015169	0.01289	0.000274	0.008936	0.020692	0.017197	0.007048	0.005728	0.005987	0.010913	0.010701	0.001096	0.00382	0.007348	0.015245	0.008219	0.011632	0.010381	0.035476	0.002574	0.010838	0.01191	0.065773	0.004171	0.005662	0.007073	0.027546	0.002698	0.015709	0.027199	0.008288	0.033861
Clavibacter michiganensis NCPPB 382 uid61625	0.000292	0.000491	0.01476	0.016602	0.000303	0.000363	0.040364	0.016017	0.000963	0.000689	0.029741	0.029202	0.000311	0.000397	0.014855	0.001622	6e-05	0.000464	0.017694	0.000692	0.0001	0.000299	0.027442	0.000871	0.000735	0.000587	0.018973	0.019442	0.002272	0.00013	0.004474	0.013647	0.000506	0.001013	0.018677	0.025767	0.000385	0.000761	0.065961	0.031829	0.000758	0.001242	0.025988	0.029307	0.002577	0.003376	0.050874	0.018669	0.001697
Clavibacter michiganensis nebraskensis NCPPB 2581 uid195908	0.00026	0.000441	0.014908	0.01695	0.000235	0.000382	0.040088	0.016136	0.000785	0.000566	0.029892	0.029295	0.000288	0.000376	0.01479	0.001488	5.6e-05	0.00043	0.017811	0.000713	0.000126	0.0003	0.02741	0.000906	0.000615	0.000472	0.018965	0.019228	0.002282	9.9e-05	0.004452	0.01352	0.000486	0.000925	0.01882	0.025825	0.000393	0.000698	0.066589	0.031546	0.00064	0.00107	0.026147	0.029523	0.002249	0.003235	0.051797	0.019202	0.001563
Clavibacter michiganensis sepedonicus uid61577	0.000386	0.000547	0.015132	0.016928	0.000293	0.000464	0.040218	0.015641	0.000961	0.000865	0.029764	0.028766	0.000442	0.000482	0.014763	0.001865	8.2e-05	0.000654	0.018032	0.000694	0.00012	0.000353	0.027334	0.001358	0.001223	0.000545	0.018889	0.019243	0.00234	0.000145	0.004605	0.013614	0.000717	0.001604	0.01958	0.025611	0.00039	0.00094	0.06385	0.031805	0.000936	0.001354	0.025543	0.029622	0.00304	0.004078	0.050319	0.020979	0.001978
Clostridiales genomosp BVAB3 UPII9 5 uid46219	0.043394	0.029568	0.01671	0.021183	0.017217	0.033781	0.017582	0.024522	0.0118	0.014935	0.015397	0.011976	0.006359	0.010511	0.011533	0.003458	0.001427	0.024292	0.011731	0.000495	0.018692	0.027223	0.014792	0.034209	0.010197	0.009607	0.008114	0.008283	0.000985	0.006376	0.006819	0.009325	0.01927	0.011381	0.006417	0.013479	0.006576	0.016749	0.006982	0.017562	0.006806	0.00986	0.005079	0.018922	0.005869	0.01326	0.011494	0.007227	0.043423
Clostridium acetobutylicum ATCC 824 uid57677	0.063221	0.052464	0.012638	0.030749	0.056159	0.035397	0.004623	0.025206	0.021866	0.019473	0.004891	0.002997	0.023759	0.018918	0.007784	0.006027	0.002066	0.033647	0.009104	0.000826	0.035849	0.037931	0.006711	0.009752	0.018199	0.016291	0.003947	0.002313	0.000365	0.008381	0.003611	0.007177	0.016155	0.010433	0.002856	0.006995	0.009368	0.026807	0.002345	0.00234	0.011901	0.012146	0.001253	0.001731	0.000987	0.002159	0.000547	0.000149	0.050127
Clostridium acetobutylicum DSM 1731 uid68293	0.063207	0.052502	0.012659	0.030703	0.056153	0.035437	0.00465	0.02518	0.021901	0.019508	0.004877	0.002994	0.023777	0.018927	0.007794	0.006032	0.002082	0.03368	0.009114	0.000831	0.035901	0.037952	0.006739	0.009742	0.018218	0.016318	0.003942	0.002313	0.000366	0.008388	0.003607	0.007215	0.016158	0.010435	0.00286	0.006995	0.00938	0.026754	0.002335	0.002341	0.011887	0.012156	0.001245	0.001719	0.000988	0.002161	0.000545	0.000149	0.050078
Clostridium acetobutylicum EA 2018 uid159515	0.063218	0.052512	0.012652	0.030715	0.05616	0.03543	0.004644	0.025174	0.021874	0.019517	0.004878	0.002996	0.023793	0.018928	0.007801	0.006027	0.00208	0.033672	0.009114	0.000836	0.035895	0.037955	0.006741	0.009733	0.018216	0.016315	0.003943	0.002309	0.000368	0.008386	0.003601	0.007197	0.016147	0.010436	0.002859	0.006994	0.009385	0.026755	0.002333	0.002343	0.011881	0.012152	0.001242	0.001717	0.000981	0.002155	0.000544	0.000147	0.050093
Clostridium acidurici 9a uid176126	0.065426	0.046311	0.012926	0.023962	0.07049	0.028966	0.005552	0.024685	0.021553	0.022915	0.0025	0.003065	0.027657	0.020619	0.005988	0.00407	0.002118	0.031911	0.007408	0.000911	0.04359	0.032849	0.007343	0.007417	0.018479	0.017888	0.001876	0.002447	0.000318	0.007517	0.002025	0.006353	0.018643	0.010624	0.003078	0.005474	0.01783	0.018238	0.001686	0.002815	0.013232	0.011451	0.000926	0.001567	0.001177	0.002169	0.000356	0.000154	0.058929
Clostridium beijerinckii NCIMB 8052 uid58137	0.061489	0.054627	0.010418	0.025916	0.049546	0.042762	0.006586	0.025406	0.022926	0.021092	0.00289	0.002623	0.023105	0.017807	0.007392	0.004747	0.002104	0.034129	0.006568	0.000789	0.045094	0.035611	0.00757	0.010529	0.020149	0.015833	0.002378	0.002639	0.000267	0.008226	0.003533	0.007332	0.018724	0.011202	0.002235	0.005495	0.010577	0.019081	0.001739	0.002273	0.01437	0.010241	0.000768	0.001903	0.001334	0.002554	0.000587	0.000251	0.058648
Clostridium BNL1100 uid84307	0.048061	0.037922	0.019331	0.029588	0.038797	0.035971	0.011033	0.025818	0.023749	0.015833	0.011218	0.004992	0.0177	0.014177	0.010941	0.008632	0.001828	0.027905	0.013054	0.000601	0.019636	0.03121	0.011745	0.015516	0.018235	0.011039	0.008766	0.003977	0.000477	0.007568	0.00501	0.009009	0.013003	0.010029	0.004451	0.016718	0.006689	0.025102	0.005381	0.015548	0.007594	0.012569	0.005104	0.007025	0.001936	0.004812	0.001628	0.001972	0.04682
Clostridium botulinum A ATCC 19397 uid58927	0.076155	0.056181	0.009446	0.022662	0.06739	0.032231	0.00391	0.025854	0.020206	0.02047	0.00426	0.001683	0.02412	0.017217	0.005278	0.004398	0.002421	0.036111	0.005372	0.000745	0.0532	0.037912	0.005637	0.008266	0.01473	0.018952	0.004276	0.000708	0.000236	0.009568	0.002828	0.006818	0.017232	0.011612	0.002021	0.004627	0.010232	0.015841	0.00102	0.001488	0.012651	0.012613	0.001551	0.001029	0.000887	0.001576	0.00034	0.00019	0.060505
Clostridium botulinum A ATCC 3502 uid61579	0.076001	0.055926	0.009423	0.022664	0.067486	0.032229	0.003889	0.025874	0.020268	0.020494	0.00424	0.001676	0.024057	0.017157	0.005271	0.004388	0.002416	0.036094	0.005338	0.000752	0.053111	0.037924	0.005661	0.008281	0.014743	0.018928	0.00427	0.000726	0.000231	0.009531	0.002797	0.006826	0.017182	0.011537	0.002008	0.004619	0.010179	0.015874	0.001017	0.00147	0.012726	0.012589	0.001558	0.00103	0.000882	0.001573	0.000342	0.000198	0.06049
Clostridium botulinum A Hall uid58931	0.075858	0.05597	0.00939	0.022557	0.067878	0.032153	0.0039	0.025862	0.020147	0.020468	0.004267	0.001689	0.024131	0.017068	0.005206	0.004331	0.002393	0.036076	0.005324	0.000704	0.053294	0.037941	0.005636	0.00825	0.014828	0.019077	0.004264	0.000707	0.000216	0.00958	0.002817	0.006741	0.017067	0.011564	0.001999	0.004566	0.010177	0.015875	0.000999	0.001479	0.012731	0.012687	0.00156	0.001039	0.000883	0.001565	0.000336	0.000193	0.060438
Clostridium botulinum A2 Kyoto uid59229	0.076245	0.056531	0.009533	0.022794	0.06662	0.032657	0.004003	0.025638	0.020646	0.020576	0.00423	0.001763	0.024003	0.017327	0.005366	0.004397	0.002462	0.036293	0.005463	0.000761	0.05315	0.037639	0.005679	0.008325	0.014632	0.018668	0.004218	0.000797	0.000221	0.009469	0.002745	0.00701	0.017485	0.011449	0.002035	0.004756	0.010194	0.015608	0.001058	0.001552	0.0126	0.012329	0.001634	0.0011	0.000991	0.001657	0.000415	0.000256	0.060908
Clostridium botulinum A3 Loch Maree uid59149	0.075734	0.055934	0.009486	0.022619	0.066819	0.032876	0.004008	0.025876	0.02042	0.020479	0.004255	0.001717	0.023813	0.017132	0.005216	0.004408	0.002414	0.036104	0.005379	0.000736	0.052699	0.037924	0.005718	0.00856	0.014873	0.01895	0.004326	0.000825	0.000235	0.009459	0.002848	0.006821	0.017284	0.01154	0.002041	0.004644	0.010229	0.015888	0.001127	0.00155	0.012711	0.012503	0.001623	0.001048	0.000959	0.001682	0.000391	0.000199	0.060193
Clostridium botulinum B Eklund 17B uid59159	0.071007	0.060605	0.008918	0.021701	0.056839	0.040021	0.004196	0.025018	0.023576	0.022217	0.001899	0.001632	0.024364	0.018856	0.004745	0.003062	0.00237	0.036093	0.005477	0.00072	0.056803	0.037397	0.005688	0.007386	0.021041	0.016784	0.001174	0.001177	0.000218	0.010173	0.00245	0.006848	0.020149	0.011009	0.001621	0.00245	0.007654	0.016737	0.000562	0.001003	0.014506	0.00999	0.000615	0.001013	0.000834	0.001824	0.000189	9.4e-05	0.064115
Clostridium botulinum B1 Okra uid59147	0.075575	0.055844	0.009552	0.022676	0.066813	0.032559	0.003974	0.025951	0.020203	0.020494	0.004287	0.001797	0.024048	0.017163	0.005277	0.004356	0.002463	0.035805	0.005481	0.000714	0.052906	0.037804	0.005765	0.00843	0.014843	0.018873	0.00431	0.000791	0.00024	0.009477	0.002821	0.006804	0.017131	0.011591	0.002023	0.004733	0.010228	0.01593	0.001076	0.001602	0.012706	0.012523	0.001579	0.001041	0.000908	0.001681	0.000389	0.000223	0.060549
Clostridium botulinum Ba4 657 uid59173	0.076893	0.056056	0.009495	0.022636	0.067116	0.032245	0.00394	0.025672	0.02048	0.020534	0.004175	0.001689	0.024237	0.017243	0.005257	0.004364	0.002464	0.036073	0.005449	0.000781	0.053291	0.037672	0.005609	0.008236	0.014617	0.018845	0.004181	0.000749	0.000233	0.009538	0.002718	0.006916	0.017515	0.011508	0.001946	0.004623	0.009993	0.015781	0.00101	0.001521	0.012554	0.012453	0.001569	0.001022	0.000929	0.001562	0.00039	0.00019	0.060976
Clostridium botulinum BKT015925 uid66203	0.075317	0.057909	0.009491	0.021623	0.062075	0.037206	0.004057	0.025079	0.021788	0.022285	0.002809	0.002307	0.025127	0.019238	0.003879	0.003477	0.002253	0.035232	0.005091	0.000701	0.049876	0.037126	0.005438	0.007157	0.017883	0.017944	0.00217	0.001664	0.000209	0.010605	0.0023	0.006235	0.020392	0.011777	0.002085	0.003478	0.008468	0.019508	0.000968	0.000864	0.01309	0.012848	0.001039	0.001433	0.001076	0.002299	0.000329	0.000118	0.058013
Clostridium botulinum E3 Alaska E43 uid59157	0.070418	0.061209	0.008629	0.02153	0.058113	0.040005	0.004174	0.024909	0.023413	0.022359	0.001751	0.001729	0.024354	0.018864	0.004669	0.002765	0.002351	0.035574	0.005147	0.000701	0.057261	0.03764	0.005645	0.007438	0.021427	0.017193	0.001108	0.001306	0.000187	0.010076	0.002371	0.006465	0.019747	0.010917	0.001634	0.002349	0.00761	0.016839	0.000494	0.000964	0.014307	0.010188	0.000579	0.001093	0.000819	0.001733	0.000172	6.6e-05	0.063308
Clostridium botulinum F 230613 uid159513	0.075249	0.055569	0.00958	0.022581	0.066904	0.032689	0.003954	0.026032	0.020578	0.020663	0.004206	0.001751	0.024017	0.017152	0.00527	0.004383	0.002535	0.035652	0.005327	0.000774	0.053114	0.037901	0.0057	0.0084	0.014775	0.018847	0.004188	0.00074	0.000268	0.009499	0.002809	0.006824	0.017162	0.011464	0.001997	0.004678	0.010216	0.01593	0.00104	0.00158	0.012908	0.012592	0.001542	0.001063	0.000923	0.001676	0.000363	0.000203	0.060098
Clostridium botulinum F Langeland uid58929	0.07583	0.056056	0.009578	0.022763	0.066725	0.032484	0.003956	0.025852	0.020455	0.020622	0.004206	0.001738	0.024009	0.017276	0.005311	0.004351	0.002446	0.035777	0.005332	0.000719	0.053025	0.03769	0.005656	0.00831	0.014743	0.018966	0.004254	0.000751	0.000221	0.009444	0.002754	0.006816	0.017244	0.01147	0.002005	0.004683	0.010235	0.015881	0.001035	0.001546	0.012703	0.012561	0.001548	0.001058	0.000909	0.001686	0.000356	0.000196	0.060681
Clostridium botulinum H04402 065 uid162091	0.075638	0.055825	0.009525	0.02264	0.067154	0.032207	0.003916	0.025923	0.0203	0.020522	0.004274	0.001704	0.024168	0.017142	0.005286	0.004392	0.00248	0.036095	0.005439	0.000749	0.053274	0.037667	0.00578	0.008214	0.014911	0.018937	0.004237	0.000763	0.00028	0.009483	0.002773	0.006798	0.017247	0.011541	0.001993	0.004628	0.010205	0.015958	0.00104	0.001499	0.012806	0.012507	0.001518	0.001007	0.000881	0.001647	0.000363	0.000203	0.060605
Clostridium cellulolyticum H10 uid58709	0.047449	0.037283	0.019106	0.0309	0.039745	0.035365	0.010416	0.025526	0.023767	0.015917	0.010401	0.005285	0.018042	0.014565	0.010834	0.009508	0.001767	0.02775	0.013051	0.000636	0.018946	0.030708	0.011517	0.015123	0.017784	0.011518	0.008143	0.004321	0.000485	0.007606	0.004695	0.008981	0.013016	0.010069	0.004471	0.016831	0.007297	0.025653	0.00552	0.015175	0.007926	0.012768	0.005107	0.006779	0.002117	0.005026	0.001568	0.001839	0.045805
Clostridium cellulovorans 743B uid51503	0.056408	0.048883	0.013594	0.028097	0.045371	0.039451	0.009789	0.023719	0.022816	0.024176	0.005135	0.003081	0.022465	0.018472	0.007121	0.005099	0.001871	0.034861	0.008043	0.00079	0.041343	0.034619	0.008875	0.010025	0.018054	0.01644	0.003467	0.001927	0.000282	0.00807	0.003011	0.008169	0.01997	0.011129	0.002603	0.005837	0.010697	0.021465	0.001909	0.002356	0.014342	0.010819	0.000908	0.001655	0.001778	0.002863	0.000606	0.000363	0.056565
Clostridium cf saccharolyticum K10 uid197201	0.025033	0.018374	0.017831	0.034801	0.007682	0.027406	0.029634	0.030691	0.016206	0.006489	0.01608	0.012314	0.014385	0.00486	0.017245	0.012923	0.001503	0.019858	0.016961	0.000991	0.007264	0.025031	0.015848	0.005423	0.006086	0.008539	0.018164	0.004071	0.001054	0.004847	0.010436	0.009288	0.002897	0.008056	0.008242	0.029829	0.001283	0.019204	0.013718	0.045411	0.003829	0.007086	0.008962	0.016124	0.002156	0.005089	0.010692	0.011061	0.029856
Clostridium clariflavum DSM 19732 uid82345	0.055027	0.03889	0.017432	0.028286	0.039907	0.040088	0.009901	0.024166	0.019298	0.015045	0.010941	0.004449	0.019193	0.013629	0.010327	0.01	0.001678	0.032253	0.011158	0.000697	0.021375	0.033788	0.010051	0.020781	0.013494	0.010038	0.008881	0.006096	0.000639	0.0068	0.005257	0.008875	0.012682	0.010141	0.003605	0.013101	0.005187	0.023286	0.004252	0.012969	0.00636	0.012233	0.005391	0.008489	0.002468	0.004104	0.0021	0.002212	0.053752
Clostridium difficile 630 uid57679	0.06829	0.052333	0.01052	0.022519	0.059648	0.03332	0.005743	0.026454	0.023421	0.021122	0.002474	0.002151	0.024047	0.019977	0.004492	0.003524	0.002209	0.033422	0.007312	0.000801	0.045831	0.037468	0.005858	0.011802	0.018556	0.018811	0.001962	0.001365	0.000232	0.010502	0.001917	0.00622	0.019027	0.011193	0.00233	0.004829	0.010381	0.018871	0.00129	0.002721	0.015432	0.010171	0.000757	0.000938	0.001189	0.002578	0.000526	0.000251	0.058477
Clostridium difficile BI1 uid158363	0.068905	0.053335	0.010103	0.021883	0.061955	0.033224	0.005054	0.026415	0.023311	0.021586	0.001918	0.001838	0.024559	0.020338	0.004172	0.003481	0.002207	0.03367	0.00707	0.000789	0.047108	0.037652	0.005587	0.01161	0.019086	0.019138	0.001605	0.001281	0.000192	0.010701	0.001798	0.006162	0.01916	0.011301	0.002191	0.00414	0.010552	0.018553	0.001026	0.002086	0.015731	0.010291	0.000602	0.000587	0.00102	0.002344	0.000304	6.6e-05	0.058197
Clostridium difficile CD196 uid41017	0.068787	0.053346	0.010149	0.021914	0.062026	0.033199	0.005049	0.026581	0.023294	0.021562	0.001926	0.001842	0.024484	0.02026	0.004129	0.003594	0.002188	0.033742	0.007107	0.000792	0.0471	0.037686	0.005582	0.011612	0.019063	0.019153	0.001619	0.001289	0.000188	0.010703	0.00181	0.006155	0.019117	0.011295	0.002192	0.004111	0.01059	0.01854	0.001025	0.002101	0.01573	0.010311	0.000591	0.000589	0.001025	0.002342	0.000305	7.5e-05	0.058029
Clostridium difficile R20291 uid40921	0.068518	0.052929	0.010299	0.022202	0.061217	0.033168	0.005356	0.026637	0.023154	0.021331	0.002132	0.001987	0.024278	0.020118	0.004316	0.00363	0.002206	0.033666	0.007199	0.000806	0.046626	0.037507	0.005667	0.011667	0.018896	0.018997	0.001775	0.001332	0.000208	0.010633	0.001882	0.006197	0.019013	0.011299	0.002278	0.004404	0.010519	0.018622	0.001137	0.002483	0.015511	0.010241	0.000687	0.000749	0.001089	0.002428	0.000458	0.000291	0.058025
Clostridium kluyveri DSM 555 uid58885	0.066009	0.05167	0.010195	0.023763	0.056596	0.03618	0.006808	0.026	0.018618	0.019085	0.007882	0.003249	0.021549	0.017823	0.006823	0.00786	0.002087	0.034338	0.006997	0.000795	0.034151	0.036756	0.006388	0.013552	0.014674	0.017224	0.00751	0.002042	0.000558	0.009675	0.003543	0.007231	0.014498	0.011468	0.003058	0.011422	0.00792	0.021567	0.003212	0.008027	0.009164	0.01336	0.003559	0.002737	0.001433	0.00271	0.001133	0.001142	0.053722
Clostridium kluyveri NBRC 12016 uid59369	0.065945	0.051622	0.010136	0.023584	0.056959	0.036312	0.006761	0.026211	0.018512	0.019004	0.007872	0.003179	0.021556	0.017778	0.006771	0.007889	0.001971	0.034419	0.006942	0.000743	0.034257	0.037096	0.006378	0.013842	0.014649	0.017293	0.007508	0.002012	0.000488	0.00972	0.003512	0.007142	0.014253	0.011477	0.003039	0.011315	0.007869	0.021626	0.003214	0.008015	0.00911	0.01337	0.003551	0.002715	0.001416	0.002646	0.001111	0.001124	0.053588
Clostridium lentocellum DSM 5427 uid49117	0.051362	0.038524	0.009972	0.024461	0.023941	0.049718	0.011128	0.027956	0.02531	0.018685	0.008377	0.005306	0.016893	0.020247	0.008055	0.004738	0.002024	0.035337	0.007922	0.000796	0.043334	0.03242	0.007524	0.007957	0.012115	0.014387	0.002932	0.00164	0.000303	0.009006	0.003269	0.008865	0.025324	0.014035	0.003309	0.008947	0.012543	0.02265	0.003929	0.003576	0.013269	0.014138	0.001907	0.00176	0.002045	0.00847	0.002213	0.000512	0.056767
Clostridium ljungdahlii DSM 13528 uid50583	0.067295	0.050886	0.010835	0.025343	0.054495	0.036923	0.004919	0.026528	0.020274	0.021399	0.00472	0.003235	0.020961	0.018558	0.007294	0.006745	0.002064	0.033117	0.007136	0.000762	0.036026	0.038021	0.005555	0.012207	0.017073	0.017575	0.005208	0.001759	0.00039	0.009851	0.003912	0.007143	0.01568	0.010699	0.002707	0.009331	0.008723	0.023773	0.002652	0.004466	0.011686	0.013883	0.001846	0.001836	0.001191	0.002449	0.000545	0.000367	0.052599
Clostridium novyi NT uid58643	0.075343	0.053637	0.012165	0.024085	0.061526	0.034783	0.004173	0.025658	0.022574	0.020885	0.002356	0.001531	0.02689	0.01812	0.004555	0.003063	0.002234	0.032952	0.007452	0.000699	0.048573	0.036687	0.005992	0.005643	0.017436	0.016383	0.00244	0.001116	0.000209	0.009931	0.002538	0.005996	0.019396	0.010741	0.002895	0.003005	0.009639	0.021719	0.000717	0.000867	0.013804	0.012068	0.000844	0.000969	0.000706	0.002154	0.000252	6.2e-05	0.062745
Clostridium pasteurianum BC1 uid201478	0.063371	0.055383	0.009606	0.025822	0.053627	0.041031	0.005466	0.024543	0.019876	0.02177	0.005594	0.002499	0.023801	0.018226	0.006828	0.005339	0.002178	0.033914	0.006865	0.000859	0.038633	0.037682	0.006728	0.011329	0.016322	0.016031	0.005572	0.001408	0.00042	0.008396	0.003391	0.007666	0.015401	0.011629	0.002624	0.009846	0.009518	0.022238	0.002396	0.005183	0.012726	0.012475	0.002231	0.001775	0.001211	0.002556	0.000589	0.000351	0.052943
Clostridium perfringens 13 uid57681	0.064223	0.052255	0.011159	0.028077	0.059505	0.031527	0.004326	0.024765	0.019214	0.023181	0.002806	0.000721	0.028727	0.017872	0.00534	0.003144	0.002356	0.033362	0.006563	0.000684	0.0617	0.036828	0.008941	0.003742	0.02	0.015892	0.002258	0.000362	0.000114	0.008927	0.002322	0.006924	0.016856	0.01046	0.002485	0.002703	0.007904	0.019124	0.000456	0.000475	0.014563	0.011782	0.000545	0.000371	0.000193	0.001118	9.1e-05	2.7e-05	0.062416
Clostridium perfringens ATCC 13124 uid57901	0.064607	0.053183	0.011228	0.028434	0.058854	0.031881	0.004311	0.024383	0.019312	0.023201	0.002926	0.000687	0.02837	0.018117	0.005288	0.003166	0.002359	0.033592	0.006587	0.000718	0.061158	0.03727	0.008919	0.003719	0.020111	0.015841	0.002339	0.000316	0.000112	0.008953	0.002252	0.007094	0.016856	0.010498	0.002394	0.00271	0.007985	0.019089	0.000465	0.000463	0.014534	0.011793	0.000572	0.000349	0.000199	0.001117	0.000105	3e-05	0.062121
Clostridium perfringens SM101 uid58117	0.066925	0.053123	0.011066	0.027614	0.060213	0.032255	0.00423	0.024337	0.01869	0.022945	0.002792	0.000803	0.028993	0.017448	0.005222	0.003205	0.002404	0.03368	0.006578	0.000692	0.061554	0.037434	0.008809	0.003921	0.020263	0.016291	0.002207	0.00045	0.000152	0.009224	0.002267	0.006648	0.017058	0.010442	0.002682	0.002602	0.0081	0.019497	0.000441	0.000528	0.014075	0.011849	0.000556	0.000465	0.000223	0.001336	0.00014	3.1e-05	0.062075
Clostridium phytofermentans ISDg uid58519	0.045714	0.039831	0.012646	0.028323	0.022551	0.04289	0.018743	0.028075	0.02184	0.016307	0.010663	0.008433	0.014443	0.015886	0.007595	0.003646	0.001883	0.034307	0.009246	0.000716	0.038335	0.033387	0.009669	0.011141	0.012221	0.015058	0.008915	0.004302	0.000351	0.009253	0.00399	0.008487	0.018072	0.013167	0.003296	0.012664	0.011903	0.021567	0.003839	0.005571	0.015269	0.009665	0.001336	0.004709	0.004901	0.009987	0.002624	0.001389	0.049247
Clostridium saccharolyticum WM1 uid51419	0.033261	0.025715	0.016935	0.03192	0.013522	0.030853	0.028375	0.031254	0.013825	0.008525	0.021782	0.009856	0.010811	0.007158	0.014711	0.009401	0.001733	0.027373	0.012827	0.000598	0.01672	0.029412	0.011964	0.011125	0.007575	0.009248	0.018738	0.003536	0.000742	0.005783	0.008096	0.009434	0.007058	0.012216	0.005041	0.025118	0.003502	0.022762	0.005989	0.031351	0.006012	0.00954	0.008512	0.011283	0.00235	0.006409	0.005678	0.010102	0.044952
Clostridium saccharoperbutylacetonicum ATCC 27021 uid189747	0.063631	0.056596	0.009255	0.024573	0.045747	0.045902	0.005855	0.025429	0.022913	0.021742	0.003506	0.002289	0.021925	0.018467	0.006038	0.004119	0.002145	0.036557	0.005736	0.00074	0.046946	0.037188	0.006718	0.011167	0.019726	0.015014	0.00238	0.002079	0.000287	0.008981	0.003057	0.008197	0.020172	0.011576	0.002087	0.004702	0.008558	0.018849	0.001337	0.001942	0.015055	0.010202	0.000721	0.001391	0.001479	0.002709	0.00054	0.00027	0.061192
Clostridium stercorarium DSM 8532 uid186819	0.047176	0.02744	0.022823	0.023864	0.034387	0.035857	0.013593	0.02639	0.015662	0.008045	0.017055	0.010336	0.014502	0.008142	0.012391	0.015358	0.001638	0.02648	0.015555	0.000468	0.012063	0.028784	0.015611	0.013534	0.011417	0.005625	0.009643	0.009757	0.000999	0.004856	0.007048	0.009327	0.005718	0.010507	0.005087	0.020013	0.001905	0.028213	0.006641	0.027871	0.003792	0.00979	0.009261	0.013526	0.001833	0.005665	0.00517	0.006042	0.053814
Clostridium stercorarium DSM 8532 uid195569	0.046985	0.027368	0.022896	0.023898	0.034415	0.03582	0.013571	0.026364	0.015633	0.00803	0.017132	0.010368	0.014509	0.008094	0.01242	0.015337	0.001568	0.026418	0.015614	0.000456	0.011857	0.028518	0.015591	0.013431	0.011396	0.005573	0.00968	0.009787	0.000939	0.004733	0.006994	0.009364	0.005606	0.010454	0.005089	0.020066	0.001895	0.028273	0.006655	0.028018	0.003774	0.009846	0.009282	0.013558	0.001782	0.005636	0.005149	0.005968	0.054039
Clostridium sticklandii uid59585	0.059096	0.040891	0.01341	0.025177	0.047095	0.036312	0.01105	0.028753	0.01804	0.022958	0.00499	0.002835	0.025695	0.012617	0.011139	0.004103	0.002017	0.030117	0.009201	0.000868	0.028781	0.035162	0.007417	0.009057	0.018584	0.0189	0.003069	0.003327	0.000297	0.005194	0.003758	0.005921	0.017231	0.01161	0.003628	0.009148	0.019025	0.027422	0.003401	0.004554	0.01352	0.01365	0.001048	0.001823	0.001009	0.002024	0.000776	0.000139	0.052455
Clostridium SY8519 uid68705	0.035856	0.020489	0.016912	0.024505	0.005325	0.026829	0.035582	0.029154	0.014314	0.005577	0.023265	0.012211	0.009335	0.006058	0.014945	0.004687	0.001531	0.024024	0.014653	0.000558	0.005396	0.02219	0.015628	0.004703	0.004494	0.006872	0.021057	0.005199	0.001032	0.00546	0.009977	0.008883	0.002288	0.012627	0.007295	0.031885	0.000925	0.012125	0.006764	0.05733	0.002418	0.003942	0.00754	0.022794	0.002609	0.008413	0.011854	0.018939	0.045238
Clostridium tetani E88 uid57683	0.076946	0.054968	0.009936	0.022294	0.067436	0.032584	0.003742	0.025157	0.019946	0.020528	0.004543	0.001623	0.025513	0.017764	0.004719	0.004964	0.002074	0.034725	0.00622	0.000612	0.052167	0.0383	0.005467	0.007746	0.015021	0.018341	0.004595	0.000903	0.000286	0.00904	0.002222	0.006389	0.017628	0.011133	0.002318	0.003808	0.011221	0.016579	0.001046	0.001397	0.012397	0.012515	0.001767	0.000834	0.000828	0.001402	0.00024	0.000181	0.063249
Clostridium thermocellum ATCC 27405 uid57917	0.052278	0.03202	0.021686	0.028262	0.036905	0.036211	0.011682	0.024527	0.016677	0.011796	0.01325	0.008506	0.0191	0.010712	0.012366	0.012559	0.001664	0.028355	0.013608	0.00058	0.013512	0.031567	0.010819	0.020586	0.011958	0.007877	0.010842	0.006522	0.000747	0.005642	0.006042	0.008759	0.010151	0.009473	0.004619	0.015384	0.003018	0.027471	0.005514	0.016494	0.004965	0.010856	0.006648	0.011394	0.001768	0.003803	0.002737	0.0033	0.051253
Clostridium thermocellum DSM 1313 uid161989	0.052145	0.031489	0.021962	0.027733	0.036753	0.036451	0.011653	0.024531	0.016284	0.011757	0.013585	0.008707	0.018893	0.010553	0.012443	0.012292	0.001667	0.028062	0.013603	0.000566	0.0127	0.031632	0.010942	0.021102	0.011832	0.007796	0.011309	0.006761	0.000719	0.005603	0.006123	0.008621	0.00975	0.009341	0.004592	0.015413	0.002527	0.027663	0.005594	0.016742	0.004573	0.010922	0.006869	0.011861	0.001656	0.003589	0.002678	0.003236	0.050909
Collimonas fungivorans Ter331 uid70793	0.014896	0.012134	0.021373	0.024604	0.003984	0.009574	0.03892	0.024059	0.004182	0.00567	0.029661	0.013281	0.001249	0.003362	0.023292	0.002822	0.001111	0.010404	0.015123	0.000484	0.002034	0.010762	0.026703	0.017092	0.00304	0.002775	0.010572	0.018999	0.001302	0.00136	0.00774	0.012948	0.01186	0.010582	0.011366	0.03227	0.001932	0.004663	0.01114	0.068893	0.004475	0.005522	0.007939	0.030089	0.001979	0.007157	0.035149	0.010315	0.032295
Colwellia psychrerythraea 34H uid57855	0.046576	0.033961	0.016527	0.013737	0.01625	0.040934	0.014172	0.023589	0.014505	0.019066	0.014236	0.00832	0.007045	0.020109	0.011369	0.00184	0.002153	0.021845	0.009546	0.00075	0.048664	0.034238	0.009269	0.014201	0.017683	0.014367	0.003196	0.00511	0.000334	0.007431	0.002672	0.011231	0.034304	0.015132	0.006319	0.010652	0.011451	0.016731	0.005471	0.006614	0.012211	0.014293	0.00398	0.004471	0.005774	0.015044	0.006523	0.001223	0.042964
Comamonas testosteroni CNB 2 uid62961	0.006737	0.009956	0.017951	0.029492	0.002708	0.01154	0.030206	0.026998	0.004342	0.004135	0.025159	0.015464	0.001633	0.003637	0.023024	0.003015	0.000742	0.010163	0.012515	0.000384	0.000737	0.012191	0.021634	0.011454	0.002536	0.00348	0.012903	0.013195	0.001973	0.001501	0.008114	0.015682	0.009651	0.011047	0.011449	0.039066	0.001711	0.005242	0.014676	0.073938	0.004009	0.007156	0.022263	0.015585	0.002888	0.01013	0.039047	0.005738	0.021563
Conexibacter woesei DSM 14684 uid43467	0.000292	0.000555	0.016157	0.014289	0.000654	0.000385	0.035297	0.015375	0.001185	0.000708	0.02159	0.032223	0.007575	0.000627	0.016097	0.001415	7.4e-05	0.001103	0.016959	0.000792	1.2e-05	0.000435	0.027762	0.002221	0.000912	0.000566	0.009805	0.020398	0.002103	0.000401	0.007365	0.013166	0.000963	0.00189	0.017715	0.025459	0.000144	0.001441	0.046633	0.054151	0.001424	0.00137	0.01495	0.039842	0.002451	0.004345	0.052288	0.01896	0.003473
Coprococcus ART55 1 uid197176	0.018487	0.025506	0.019114	0.049195	0.036057	0.012662	0.025617	0.033204	0.026058	0.008581	0.011173	0.008988	0.02123	0.008939	0.013542	0.00985	0.001587	0.026487	0.017568	0.000887	0.004984	0.020466	0.017751	0.006462	0.016251	0.006584	0.008435	0.006671	0.000759	0.008055	0.006925	0.00852	0.00227	0.009373	0.006983	0.026233	0.001665	0.027113	0.015699	0.024871	0.008529	0.009387	0.001446	0.010372	0.001804	0.004945	0.003127	0.002577	0.021105
Coprococcus catus GD 7 uid197174	0.034984	0.029364	0.012903	0.030895	0.008776	0.03763	0.027039	0.033727	0.027836	0.007262	0.010129	0.009584	0.014487	0.010902	0.010351	0.004285	0.001936	0.030862	0.01051	0.000744	0.011313	0.025938	0.012727	0.01432	0.010561	0.010473	0.010923	0.004341	0.000648	0.008516	0.006845	0.009026	0.005099	0.015225	0.004284	0.028903	0.001716	0.02009	0.006	0.033517	0.006829	0.007516	0.00194	0.01589	0.003859	0.010817	0.005078	0.005122	0.046577
Coprothermobacter proteolyticus DSM 5265 uid59253	0.032209	0.016746	0.020121	0.027364	0.022098	0.026687	0.014077	0.024771	0.014902	0.015024	0.013017	0.008958	0.014723	0.012564	0.012718	0.01051	0.001411	0.014974	0.018791	0.000863	0.016492	0.025448	0.01808	0.024796	0.009676	0.012562	0.008847	0.004578	0.001085	0.003479	0.004326	0.011923	0.016216	0.008689	0.0082	0.016361	0.012748	0.02386	0.011171	0.017847	0.012567	0.015262	0.009878	0.005291	0.004059	0.007905	0.006233	0.002863	0.045009
Coraliomargarita akajimensis DSM 45221 uid47079	0.014448	0.018041	0.017721	0.027408	0.002916	0.022	0.031558	0.022135	0.009108	0.010013	0.022699	0.013088	0.001752	0.012204	0.015772	0.001235	0.001142	0.014977	0.016117	0.001033	0.005587	0.017952	0.023127	0.022061	0.006944	0.005457	0.013145	0.01244	0.000603	0.005038	0.005815	0.014294	0.016164	0.009526	0.011838	0.022799	0.007542	0.010762	0.024526	0.02925	0.010947	0.006221	0.010539	0.017172	0.006383	0.01705	0.022238	0.006441	0.031303
Corallococcus coralloides DSM 2259 uid157997	0.000962	0.001966	0.019641	0.029606	0.000194	0.002712	0.025116	0.018815	0.001257	0.001005	0.022798	0.031216	0.000501	0.001248	0.015899	0.002731	0.000148	0.002363	0.01822	0.000708	9.2e-05	0.001101	0.032418	0.005661	0.001614	0.001204	0.02063	0.014852	0.00175	0.0013	0.007691	0.01392	0.001875	0.003118	0.017837	0.033128	0.000355	0.002514	0.033424	0.067331	0.002173	0.00363	0.026021	0.030382	0.002529	0.004824	0.044992	0.021716	0.009442
Coriobacterium glomerans PW2 uid65787	0.008066	0.007648	0.017866	0.023404	0.005812	0.006841	0.048327	0.026172	0.005527	0.002989	0.021906	0.020838	0.005484	0.003205	0.017018	0.005622	0.000302	0.01091	0.01471	0.000997	0.001033	0.008954	0.027563	0.008636	0.006498	0.00519	0.014801	0.020095	0.001573	0.002391	0.013524	0.01027	0.005689	0.009718	0.010082	0.021832	0.001857	0.011661	0.037666	0.033119	0.003116	0.004471	0.015459	0.018929	0.008613	0.007617	0.03423	0.011354	0.01148
Corynebacterium argentoratense DSM 44202 uid217419	0.010438	0.007551	0.020724	0.02186	0.00161	0.015359	0.032556	0.021774	0.006848	0.008486	0.03154	0.011691	0.000882	0.004847	0.013027	0.002886	0.001333	0.005776	0.016092	0.001225	0.00234	0.010255	0.022033	0.021692	0.004163	0.008148	0.017648	0.010729	0.000542	0.002599	0.006252	0.013057	0.011401	0.006064	0.016026	0.023323	0.006822	0.010288	0.022829	0.029382	0.006265	0.007966	0.019584	0.016868	0.004805	0.01403	0.029823	0.007862	0.027351
Corynebacterium aurimucosum ATCC 700975 uid59409	0.006295	0.007259	0.021635	0.028634	0.00127	0.014474	0.033245	0.021462	0.004348	0.007382	0.0339	0.014565	0.000967	0.002594	0.010319	0.001884	0.001483	0.007038	0.01569	0.001147	0.002058	0.008763	0.024956	0.011998	0.003736	0.006883	0.025529	0.010738	0.000445	0.00173	0.005534	0.013784	0.007544	0.004529	0.016972	0.02538	0.004893	0.010803	0.030113	0.0351	0.006286	0.005992	0.014153	0.023662	0.002995	0.009672	0.038797	0.006266	0.021787
Corynebacterium callunae DSM 20147 uid193714	0.013359	0.01599	0.016268	0.021971	0.001819	0.029192	0.026875	0.021885	0.005362	0.014784	0.034043	0.005616	0.002219	0.005381	0.010626	0.002363	0.001853	0.012472	0.009358	0.000838	0.006498	0.019018	0.016231	0.022572	0.00696	0.012528	0.020719	0.005146	0.000431	0.002723	0.003446	0.014069	0.014091	0.008225	0.012271	0.020849	0.00797	0.018416	0.018263	0.024319	0.016949	0.012394	0.010306	0.008661	0.004754	0.016697	0.025367	0.00438	0.035362
Corynebacterium diphtheriae 241 uid83607	0.01627	0.011828	0.019247	0.020343	0.003278	0.022528	0.030144	0.022305	0.009786	0.012853	0.026047	0.012287	0.002025	0.005463	0.010217	0.002247	0.001664	0.009563	0.013309	0.000988	0.006405	0.015619	0.01815	0.020398	0.007387	0.011795	0.014853	0.012318	0.000507	0.003363	0.005064	0.013987	0.016274	0.009715	0.014115	0.018319	0.009043	0.017594	0.021182	0.019062	0.015295	0.01145	0.010423	0.011308	0.007921	0.018075	0.023246	0.00588	0.031527
Corynebacterium diphtheriae 31A uid84309	0.016126	0.011569	0.018785	0.019864	0.00341	0.022189	0.030695	0.022428	0.0097	0.012731	0.026199	0.012192	0.002049	0.005372	0.010407	0.002319	0.001605	0.00944	0.013231	0.001024	0.006358	0.015348	0.018088	0.020257	0.007306	0.011627	0.015	0.012215	0.000598	0.003353	0.005235	0.014207	0.016276	0.009821	0.014416	0.01842	0.00915	0.017384	0.021452	0.019362	0.015159	0.011278	0.0108	0.011318	0.007886	0.018035	0.023441	0.00618	0.031362
Corynebacterium diphtheriae BH8 uid84311	0.016293	0.011755	0.018854	0.020116	0.00332	0.022316	0.030442	0.022309	0.009647	0.012681	0.026009	0.012444	0.002013	0.00541	0.010403	0.002358	0.001637	0.009522	0.013309	0.001017	0.00642	0.015502	0.018081	0.020471	0.007323	0.011623	0.014954	0.012323	0.000596	0.003355	0.005179	0.014128	0.016246	0.00971	0.014233	0.018335	0.008999	0.017492	0.021388	0.019348	0.01508	0.01128	0.010638	0.011411	0.007991	0.018121	0.023446	0.006353	0.031573
Corynebacterium diphtheriae C7 beta uid84313	0.016573	0.011561	0.019334	0.019891	0.003381	0.022011	0.030836	0.022482	0.010072	0.012721	0.026294	0.012137	0.002029	0.005281	0.010409	0.002346	0.001643	0.009282	0.013397	0.00098	0.006276	0.015202	0.018257	0.020183	0.007375	0.011471	0.014912	0.012141	0.000563	0.003385	0.005182	0.014177	0.016618	0.009601	0.014477	0.018122	0.009304	0.017447	0.021811	0.018953	0.015445	0.011182	0.010744	0.011074	0.007994	0.017909	0.023626	0.005988	0.031892
Corynebacterium diphtheriae CDCE 8392 uid84295	0.015892	0.011496	0.018928	0.019765	0.003272	0.022382	0.030582	0.022447	0.009726	0.012631	0.026154	0.012181	0.001896	0.005397	0.010422	0.002223	0.001647	0.009335	0.013164	0.000984	0.006282	0.015421	0.018078	0.02061	0.007276	0.011657	0.01487	0.012317	0.000532	0.003333	0.005176	0.014103	0.016286	0.009767	0.014365	0.018535	0.00907	0.017597	0.021687	0.019294	0.015383	0.011277	0.010582	0.01111	0.007962	0.018087	0.023665	0.005899	0.031443
Corynebacterium diphtheriae HC01 uid84297	0.016289	0.011821	0.019223	0.020326	0.003281	0.022539	0.03016	0.022276	0.009796	0.012856	0.02608	0.012272	0.002032	0.005465	0.010246	0.002252	0.001667	0.009572	0.013322	0.000986	0.006396	0.015607	0.018148	0.020416	0.007388	0.011793	0.014867	0.012304	0.000503	0.003352	0.005056	0.013975	0.016265	0.009722	0.01412	0.018325	0.009035	0.017592	0.021175	0.019077	0.015305	0.011441	0.01041	0.011317	0.007928	0.018068	0.023284	0.00589	0.031537
Corynebacterium diphtheriae HC02 uid84317	0.016017	0.011445	0.01924	0.020207	0.003198	0.022039	0.030802	0.022234	0.009643	0.012654	0.026364	0.012315	0.001931	0.005307	0.010368	0.002283	0.001603	0.009359	0.013509	0.000963	0.006203	0.01528	0.018378	0.020336	0.007262	0.011506	0.014946	0.012363	0.000524	0.003299	0.005127	0.013915	0.016097	0.009535	0.014378	0.018755	0.008971	0.017432	0.021658	0.019618	0.014906	0.011242	0.010685	0.011355	0.007899	0.017897	0.023491	0.006054	0.031261
Corynebacterium diphtheriae HC03 uid84299	0.016089	0.011823	0.019141	0.02036	0.003268	0.022434	0.030167	0.022261	0.009639	0.012989	0.02605	0.012325	0.001981	0.005403	0.010343	0.00229	0.001615	0.009552	0.013395	0.000951	0.006277	0.01552	0.01811	0.020369	0.007224	0.01169	0.014942	0.012473	0.000543	0.003321	0.005154	0.013985	0.016322	0.009711	0.014249	0.018364	0.008979	0.017559	0.021314	0.01902	0.015146	0.011534	0.01063	0.011236	0.007869	0.0181	0.023428	0.005953	0.031603
Corynebacterium diphtheriae HC04 uid84301	0.016241	0.011846	0.019122	0.02024	0.003281	0.02252	0.030173	0.022248	0.00973	0.013016	0.026016	0.012304	0.002045	0.0054	0.010369	0.002252	0.001597	0.009587	0.013207	0.00098	0.006325	0.01558	0.018002	0.020475	0.007266	0.011715	0.014829	0.012455	0.000545	0.003314	0.005049	0.013911	0.016315	0.009673	0.014201	0.018283	0.0091	0.017652	0.021212	0.018943	0.0152	0.011459	0.010682	0.011265	0.007903	0.018109	0.023361	0.00588	0.031629
Corynebacterium diphtheriae INCA 402 uid83605	0.015721	0.011444	0.019212	0.02003	0.003328	0.022167	0.030635	0.022319	0.009607	0.012696	0.026263	0.012215	0.001919	0.005316	0.010441	0.002251	0.001607	0.009299	0.013408	0.000972	0.006309	0.015354	0.018271	0.020349	0.007226	0.011603	0.015027	0.012282	0.000512	0.003321	0.005181	0.013959	0.016256	0.009644	0.014312	0.018498	0.009063	0.017476	0.021685	0.01949	0.015207	0.011304	0.010745	0.011234	0.007881	0.018028	0.023563	0.005998	0.031348
Corynebacterium diphtheriae NCTC 13129 uid57691	0.01642	0.011849	0.018995	0.020225	0.003368	0.022522	0.030105	0.022141	0.010026	0.012813	0.025916	0.012181	0.002058	0.005513	0.010464	0.002286	0.001626	0.009591	0.013178	0.00095	0.006325	0.01553	0.018016	0.020362	0.007392	0.011727	0.014779	0.012292	0.000538	0.00336	0.0051	0.014058	0.016329	0.009796	0.014136	0.018378	0.009191	0.017626	0.02134	0.01898	0.015269	0.011424	0.010561	0.011289	0.007961	0.01786	0.023211	0.005964	0.031601
Corynebacterium diphtheriae PW8 uid84303	0.016054	0.011405	0.019129	0.020179	0.003152	0.022136	0.030681	0.022252	0.009788	0.012582	0.026101	0.012321	0.002078	0.005367	0.010246	0.002354	0.001596	0.009277	0.013268	0.000996	0.006223	0.015131	0.018274	0.020403	0.007394	0.011511	0.014816	0.012379	0.000586	0.003279	0.005068	0.013916	0.016119	0.009681	0.014261	0.018673	0.008965	0.017285	0.021787	0.019433	0.015191	0.011333	0.010603	0.011326	0.008064	0.018018	0.023435	0.00626	0.031409
Corynebacterium diphtheriae VA01 uid84305	0.016148	0.011829	0.019247	0.020067	0.003261	0.022555	0.030409	0.022309	0.009761	0.012936	0.026038	0.012258	0.001981	0.005345	0.010333	0.002195	0.001619	0.009492	0.013198	0.000974	0.006339	0.01558	0.018134	0.020555	0.007239	0.011772	0.01493	0.012403	0.000513	0.003309	0.005071	0.01396	0.0163	0.009701	0.014112	0.018333	0.008984	0.017627	0.021407	0.018826	0.015322	0.011494	0.010632	0.011031	0.007818	0.018116	0.023333	0.005804	0.031576
Corynebacterium efficiens YS 314 uid62905	0.006044	0.006618	0.02063	0.020194	0.001213	0.004956	0.046052	0.021933	0.004215	0.003107	0.049902	0.009031	0.001701	0.003822	0.008786	0.004533	0.000792	0.005706	0.015556	0.001127	0.001215	0.003403	0.02894	0.006458	0.00406	0.002384	0.028446	0.008652	0.001146	0.002401	0.004775	0.014489	0.003051	0.006139	0.016677	0.028701	0.001689	0.004728	0.03067	0.051723	0.005394	0.003595	0.021941	0.022954	0.003347	0.013998	0.027519	0.015551	0.015883
Corynebacterium glutamicum ATCC 13032 uid193708	0.013713	0.010921	0.021934	0.020927	0.001704	0.021791	0.03427	0.022136	0.007535	0.012528	0.032748	0.008714	0.002153	0.004803	0.010329	0.00317	0.001693	0.007452	0.014704	0.000944	0.004945	0.013336	0.022792	0.019481	0.008145	0.01099	0.02136	0.007543	0.000505	0.002263	0.004022	0.013982	0.012922	0.00665	0.014234	0.020776	0.005837	0.016663	0.02196	0.02777	0.016833	0.011235	0.009656	0.010366	0.006532	0.013666	0.025063	0.004795	0.03592
Corynebacterium glutamicum ATCC 13032 uid57905	0.013696	0.0109	0.021929	0.020913	0.001701	0.021784	0.034255	0.022128	0.007522	0.012527	0.032751	0.008708	0.002146	0.0048	0.010327	0.003169	0.001695	0.007451	0.014697	0.000941	0.004946	0.013315	0.02278	0.019489	0.008139	0.010995	0.021362	0.007549	0.000504	0.002264	0.004024	0.013971	0.012918	0.006656	0.014236	0.020781	0.005835	0.016674	0.021951	0.02778	0.01684	0.011234	0.009659	0.010371	0.006526	0.013669	0.02506	0.004799	0.035905
Corynebacterium glutamicum ATCC 13032 uid61611	0.013831	0.010916	0.021761	0.020923	0.001763	0.021778	0.034158	0.02216	0.007626	0.012552	0.03258	0.00877	0.00223	0.004871	0.01031	0.003232	0.001702	0.007456	0.014627	0.000959	0.005073	0.013362	0.022787	0.019631	0.00819	0.011005	0.02142	0.007572	0.00053	0.002333	0.00408	0.014031	0.012968	0.006688	0.014195	0.020672	0.005842	0.016606	0.021803	0.027764	0.016853	0.011271	0.009698	0.010449	0.006593	0.013676	0.024962	0.004923	0.035848
Corynebacterium glutamicum MB001 uid214793	0.013449	0.010236	0.021762	0.020967	0.001524	0.021378	0.034968	0.022101	0.007241	0.012224	0.033176	0.008674	0.00204	0.004511	0.01017	0.003195	0.001676	0.006979	0.014702	0.000946	0.004861	0.012797	0.023152	0.019863	0.007882	0.010758	0.022077	0.007497	0.000499	0.002214	0.004013	0.014078	0.012721	0.006347	0.014237	0.020415	0.005679	0.016487	0.022014	0.02853	0.017022	0.011164	0.009793	0.010444	0.006395	0.013667	0.025627	0.004897	0.036117
Corynebacterium glutamicum R uid58897	0.013243	0.010255	0.021703	0.020769	0.001541	0.02119	0.035453	0.022149	0.007355	0.012507	0.032825	0.008801	0.002136	0.004544	0.010269	0.003397	0.001637	0.006861	0.014622	0.000984	0.004732	0.012636	0.023405	0.019547	0.007979	0.01099	0.021868	0.007732	0.000567	0.002297	0.004197	0.014204	0.012383	0.0064	0.014291	0.020352	0.005617	0.016564	0.022201	0.028512	0.016825	0.011117	0.009911	0.010546	0.006442	0.013439	0.025101	0.005091	0.03547
Corynebacterium glutamicum SCgG1 uid207285	0.013715	0.010587	0.021594	0.020773	0.001711	0.021777	0.035024	0.022274	0.007434	0.012573	0.032395	0.008661	0.002122	0.004698	0.010072	0.003224	0.001664	0.007121	0.014736	0.000946	0.004926	0.012953	0.023211	0.01951	0.008124	0.010981	0.021523	0.007582	0.000519	0.002191	0.003914	0.014011	0.012632	0.006538	0.014023	0.020266	0.0059	0.01677	0.022044	0.028151	0.01677	0.011076	0.009713	0.010411	0.006615	0.01342	0.024748	0.005	0.03615
Corynebacterium glutamicum SCgG2 uid207286	0.013717	0.010593	0.021588	0.020778	0.00172	0.021772	0.035017	0.022267	0.007434	0.012585	0.032392	0.008668	0.002122	0.004701	0.010069	0.003217	0.001664	0.007123	0.014741	0.000948	0.004933	0.012957	0.023207	0.019519	0.008122	0.010979	0.02152	0.007578	0.000519	0.002193	0.003918	0.01402	0.012623	0.006542	0.014027	0.020265	0.005902	0.016775	0.022052	0.028156	0.016771	0.011081	0.009703	0.010405	0.006608	0.013414	0.024744	0.00499	0.036162
Corynebacterium halotolerans YIM 70093 DSM 44683 uid189953	0.001898	0.002742	0.020929	0.020456	0.000371	0.002292	0.042188	0.019866	0.001564	0.001749	0.046382	0.013212	0.000593	0.001667	0.008781	0.002509	0.000395	0.001551	0.018538	0.001087	0.000155	0.001044	0.030236	0.003224	0.001487	0.000918	0.027441	0.011956	0.001592	0.00071	0.005274	0.014601	0.00123	0.001945	0.020587	0.027627	0.000667	0.001853	0.034864	0.059481	0.001483	0.001423	0.020077	0.030956	0.002012	0.007483	0.038208	0.01955	0.008683
Corynebacterium jeikeium K411 uid58399	0.006265	0.005997	0.025108	0.031625	0.00133	0.010666	0.035493	0.021692	0.004792	0.007713	0.032265	0.014195	0.001181	0.00348	0.013398	0.002394	0.001046	0.004195	0.017401	0.001368	0.001563	0.006454	0.025192	0.010143	0.002808	0.006261	0.02309	0.00975	0.000452	0.001545	0.00565	0.014136	0.0068	0.003232	0.017787	0.028822	0.006326	0.006835	0.01575	0.051299	0.006145	0.005217	0.013684	0.025192	0.004404	0.009678	0.036013	0.008546	0.020979
Corynebacterium kroppenstedtii DSM 44385 uid59411	0.013852	0.011666	0.019136	0.020948	0.002566	0.020558	0.02872	0.021553	0.009053	0.008863	0.023883	0.021536	0.001679	0.005318	0.010581	0.002846	0.00124	0.008586	0.013274	0.001011	0.005625	0.009297	0.021402	0.015366	0.008477	0.008183	0.017808	0.020343	0.000602	0.002748	0.005133	0.01389	0.010639	0.008125	0.016495	0.020917	0.004319	0.011888	0.023928	0.024365	0.007252	0.007932	0.016166	0.019787	0.007486	0.013945	0.022681	0.014112	0.025696
Corynebacterium maris DSM 45190 uid214081	0.00503	0.002468	0.021908	0.020102	0.000455	0.00383	0.039753	0.020714	0.001636	0.002997	0.041002	0.015886	0.000566	0.001441	0.009696	0.001435	0.001029	0.002984	0.018729	0.000924	0.001019	0.003658	0.027708	0.011175	0.001421	0.002563	0.025792	0.012339	0.001127	0.000754	0.004861	0.014503	0.004019	0.002974	0.018927	0.027381	0.001116	0.002674	0.027608	0.0541	0.001554	0.001986	0.016854	0.031319	0.002685	0.007751	0.037508	0.015204	0.019584
Corynebacterium pseudotuberculosis 1 06 A uid159665	0.018655	0.013934	0.016958	0.019541	0.006876	0.022659	0.028129	0.021692	0.011183	0.015093	0.020528	0.012308	0.00374	0.004803	0.010583	0.003526	0.001671	0.012325	0.010093	0.00095	0.008647	0.020213	0.014106	0.016191	0.007946	0.016312	0.015893	0.009096	0.000595	0.003116	0.00493	0.013314	0.014484	0.011437	0.011217	0.018901	0.009787	0.022918	0.020329	0.019019	0.010408	0.013385	0.012082	0.012243	0.007756	0.016088	0.019253	0.007895	0.029351
Corynebacterium pseudotuberculosis 1002 uid159677	0.018904	0.01407	0.016973	0.019961	0.006951	0.022409	0.027838	0.021468	0.011248	0.015225	0.020607	0.012402	0.003786	0.004941	0.010721	0.003643	0.001646	0.012313	0.010125	0.000935	0.008609	0.020319	0.014249	0.01605	0.007981	0.016254	0.015823	0.009163	0.000566	0.003149	0.004981	0.013442	0.014472	0.011327	0.011218	0.018805	0.009843	0.022693	0.020356	0.019137	0.010527	0.01339	0.012144	0.012348	0.007732	0.015858	0.01893	0.007976	0.029408
Corynebacterium pseudotuberculosis 258 uid167260	0.018776	0.013889	0.016983	0.019748	0.006865	0.022491	0.028043	0.021487	0.011289	0.015184	0.020744	0.012352	0.00369	0.004809	0.010701	0.003572	0.001661	0.012296	0.010018	0.000954	0.008489	0.020205	0.014255	0.016186	0.007976	0.016332	0.015899	0.009063	0.000546	0.00308	0.004915	0.013456	0.014574	0.011324	0.011193	0.018814	0.009812	0.022883	0.020385	0.019159	0.010437	0.013436	0.012074	0.012223	0.007706	0.015823	0.019112	0.007858	0.029418
Corynebacterium pseudotuberculosis 267 uid162175	0.01892	0.014096	0.01701	0.020025	0.006946	0.02245	0.027875	0.02151	0.011242	0.015165	0.02068	0.012435	0.003789	0.004936	0.010727	0.003679	0.001662	0.012337	0.010143	0.000927	0.008553	0.020397	0.014324	0.016045	0.008049	0.016209	0.01584	0.009189	0.000596	0.003227	0.005014	0.013493	0.014574	0.011338	0.011277	0.018746	0.009854	0.022713	0.020376	0.019132	0.010512	0.013289	0.012159	0.01229	0.007702	0.015801	0.018912	0.007935	0.029399
Corynebacterium pseudotuberculosis 3 99 5 uid83609	0.018781	0.014028	0.01698	0.019969	0.006951	0.022478	0.027959	0.021427	0.011174	0.015142	0.020667	0.012327	0.00367	0.004798	0.010653	0.003555	0.001701	0.012328	0.010082	0.000938	0.008526	0.020354	0.014215	0.016066	0.007915	0.016219	0.015827	0.009092	0.000597	0.00315	0.004877	0.013404	0.01448	0.011263	0.011162	0.018828	0.009784	0.022804	0.02042	0.01915	0.010416	0.013353	0.012082	0.012235	0.007649	0.015833	0.018982	0.007871	0.029546
Corynebacterium pseudotuberculosis 31 uid162167	0.018523	0.013914	0.01695	0.019679	0.006882	0.022435	0.027862	0.021465	0.011117	0.015104	0.0205	0.012412	0.003738	0.004759	0.010733	0.00363	0.001647	0.012316	0.009974	0.000985	0.008638	0.020189	0.014225	0.016224	0.007983	0.01641	0.015982	0.00917	0.000594	0.003094	0.004958	0.013453	0.014526	0.011393	0.011216	0.018734	0.009849	0.02295	0.0202	0.019118	0.010453	0.013415	0.012015	0.012305	0.00777	0.015899	0.019115	0.007949	0.029458
Corynebacterium pseudotuberculosis 316 uid89381	0.018691	0.013935	0.016967	0.019613	0.006981	0.022567	0.027981	0.021702	0.011359	0.015177	0.020472	0.012332	0.003821	0.004907	0.010669	0.003661	0.00167	0.01241	0.010057	0.000938	0.008651	0.020236	0.014348	0.016229	0.008005	0.016353	0.015906	0.009141	0.000578	0.003218	0.005018	0.013457	0.014586	0.011435	0.011243	0.018702	0.009878	0.022833	0.020324	0.019056	0.010507	0.013445	0.012052	0.012273	0.007783	0.015881	0.019168	0.007942	0.029345
Corynebacterium pseudotuberculosis 42 02 A uid159669	0.018629	0.013944	0.016955	0.019961	0.006867	0.022502	0.027966	0.021533	0.011119	0.015139	0.020639	0.01237	0.003658	0.004822	0.010603	0.003556	0.001655	0.012343	0.010137	0.000923	0.008543	0.020183	0.014279	0.016042	0.007895	0.016246	0.01584	0.009209	0.000547	0.00305	0.004854	0.013419	0.0145	0.011276	0.011191	0.01892	0.009824	0.02276	0.020391	0.019188	0.010483	0.013351	0.012114	0.012346	0.007694	0.015936	0.019096	0.00795	0.029479
Corynebacterium pseudotuberculosis C231 uid159675	0.01884	0.014074	0.017032	0.020072	0.00693	0.022398	0.02779	0.021463	0.011234	0.015171	0.020632	0.01243	0.003795	0.004936	0.010683	0.00361	0.00164	0.012316	0.010126	0.000933	0.008582	0.020302	0.014282	0.016059	0.00802	0.016239	0.015773	0.00921	0.000579	0.003135	0.005003	0.013404	0.014592	0.011369	0.011272	0.018802	0.009792	0.022683	0.020243	0.019128	0.010506	0.013379	0.012138	0.012359	0.007741	0.015887	0.018984	0.007935	0.029459
Corynebacterium pseudotuberculosis CIP 52 97 uid159667	0.018668	0.013831	0.016895	0.019535	0.006839	0.022517	0.028105	0.021566	0.01127	0.015166	0.020631	0.012351	0.003744	0.004826	0.010651	0.003542	0.001675	0.012346	0.010098	0.000938	0.008581	0.020101	0.014259	0.016134	0.00803	0.016307	0.015924	0.008992	0.000582	0.003109	0.004988	0.013457	0.014536	0.011419	0.011338	0.018804	0.009927	0.022934	0.020464	0.019026	0.010568	0.013475	0.012112	0.012269	0.007761	0.015929	0.019145	0.007872	0.02931
Corynebacterium pseudotuberculosis Cp162 uid168258	0.01854	0.013912	0.016916	0.019616	0.006816	0.022579	0.028021	0.021415	0.011196	0.015133	0.020621	0.012253	0.003585	0.004697	0.010476	0.003427	0.001681	0.012389	0.009988	0.000943	0.00859	0.020245	0.014154	0.016178	0.007875	0.016313	0.015777	0.009098	0.000561	0.003064	0.004877	0.013543	0.014597	0.011371	0.011256	0.018926	0.009869	0.022844	0.020294	0.019195	0.010413	0.013462	0.011998	0.012299	0.007654	0.016057	0.019064	0.007821	0.02945
Corynebacterium pseudotuberculosis FRC41 uid50585	0.018731	0.014061	0.017037	0.020181	0.006907	0.022419	0.027846	0.021457	0.011117	0.015158	0.020781	0.012543	0.003763	0.004916	0.010706	0.003628	0.001617	0.012284	0.010148	0.000903	0.00849	0.020263	0.014314	0.015973	0.007958	0.01616	0.015827	0.009235	0.000559	0.003106	0.004923	0.013427	0.014526	0.011259	0.011169	0.018843	0.009766	0.022619	0.020295	0.019225	0.010418	0.013316	0.012113	0.012367	0.007699	0.01575	0.019006	0.00794	0.02949
Corynebacterium pseudotuberculosis I19 uid159673	0.018864	0.014041	0.016996	0.020052	0.006906	0.02243	0.027778	0.021499	0.01121	0.015182	0.020602	0.01238	0.003804	0.004939	0.010693	0.003629	0.001637	0.012318	0.010154	0.000931	0.008636	0.02033	0.014276	0.01609	0.008035	0.016239	0.015825	0.009197	0.000578	0.00315	0.005016	0.013428	0.014552	0.011367	0.01128	0.018776	0.009784	0.022684	0.02028	0.019125	0.010514	0.013394	0.012111	0.012326	0.007732	0.015891	0.01899	0.007935	0.029451
Corynebacterium pseudotuberculosis P54B96 uid157909	0.018816	0.014132	0.017019	0.019894	0.006977	0.022422	0.027662	0.021484	0.011232	0.015217	0.020555	0.012394	0.003817	0.004956	0.010747	0.003688	0.001618	0.012349	0.010092	0.000928	0.008641	0.020322	0.014289	0.016108	0.008053	0.016306	0.01575	0.009196	0.000603	0.003182	0.005047	0.013478	0.014608	0.011395	0.011282	0.018775	0.00981	0.022724	0.020215	0.019079	0.010557	0.013444	0.012148	0.012305	0.007741	0.015913	0.018912	0.008016	0.029391
Corynebacterium pseudotuberculosis PAT10 uid159671	0.018803	0.014054	0.016999	0.019949	0.00694	0.022479	0.027802	0.021543	0.011204	0.015189	0.020596	0.012398	0.003795	0.004912	0.010694	0.003651	0.00163	0.012357	0.010161	0.000947	0.008618	0.020291	0.014334	0.016099	0.008056	0.016205	0.015785	0.00921	0.000578	0.003152	0.004987	0.013475	0.014509	0.011381	0.011298	0.018749	0.009786	0.022725	0.020291	0.019154	0.010497	0.013425	0.012186	0.012375	0.007698	0.015928	0.018984	0.007973	0.029412
Corynebacterium resistens DSM 45100 uid50555	0.011611	0.011161	0.020696	0.027168	0.00185	0.016375	0.030354	0.021656	0.007625	0.011052	0.027329	0.014548	0.001816	0.0056	0.011468	0.002713	0.001175	0.006176	0.015209	0.001167	0.003718	0.008511	0.023405	0.02053	0.005158	0.007937	0.019779	0.010449	0.000508	0.002432	0.004977	0.01378	0.013633	0.006403	0.015505	0.021824	0.008076	0.010449	0.019254	0.02934	0.013399	0.008705	0.013394	0.015222	0.006961	0.013491	0.028033	0.010223	0.031157
Corynebacterium terpenotabidum Y 11 uid210639	0.002031	0.00387	0.018298	0.019833	0.000294	0.00312	0.040095	0.019576	0.002952	0.00368	0.048374	0.014864	0.000601	0.00364	0.008568	0.002389	0.000253	0.002153	0.017941	0.000895	0.000141	0.001083	0.028204	0.004297	0.002395	0.001868	0.027174	0.012338	0.001763	0.001709	0.005571	0.014517	0.001375	0.004086	0.016552	0.026515	0.000797	0.003286	0.038059	0.049281	0.002019	0.002539	0.016553	0.031771	0.003352	0.010742	0.024532	0.025945	0.012551
Corynebacterium ulcerans 0102 uid169879	0.017811	0.011965	0.018172	0.020702	0.005685	0.020392	0.029945	0.021512	0.011113	0.013437	0.02218	0.013699	0.003223	0.004714	0.010849	0.003411	0.00157	0.010888	0.011299	0.000959	0.006657	0.01786	0.015979	0.015634	0.00753	0.014461	0.016043	0.010283	0.000588	0.002914	0.004879	0.013832	0.013764	0.010376	0.012334	0.019801	0.008793	0.021245	0.022459	0.020851	0.010571	0.012723	0.012138	0.012781	0.007734	0.015386	0.020276	0.007885	0.029922
Corynebacterium ulcerans 809 uid159659	0.017465	0.011916	0.018179	0.020237	0.005739	0.02049	0.029808	0.021488	0.011059	0.013531	0.022237	0.013826	0.003257	0.004769	0.010873	0.003426	0.001551	0.011005	0.011229	0.000916	0.006871	0.018131	0.016043	0.015795	0.007339	0.014642	0.016136	0.010365	0.000514	0.003002	0.004943	0.013724	0.013788	0.010455	0.012501	0.019455	0.008822	0.021477	0.022435	0.020724	0.010542	0.012921	0.012269	0.012788	0.007843	0.01541	0.020303	0.007814	0.029811
Corynebacterium ulcerans BR AD22 uid68291	0.017728	0.011919	0.018128	0.02052	0.005721	0.020292	0.029946	0.021618	0.011033	0.013542	0.022349	0.013769	0.003257	0.004722	0.010883	0.003456	0.001564	0.010816	0.011313	0.000939	0.0067	0.017787	0.016019	0.01558	0.007482	0.014535	0.015942	0.010368	0.000559	0.002997	0.00497	0.01392	0.013765	0.010376	0.01247	0.01968	0.008773	0.021095	0.022407	0.020827	0.01067	0.012792	0.012314	0.012821	0.007779	0.01548	0.020355	0.007955	0.029783
Corynebacterium urealyticum DSM 7109 uid61639	0.004355	0.005799	0.022836	0.030213	0.000553	0.006888	0.039323	0.021019	0.003048	0.00464	0.035958	0.014729	0.000841	0.002514	0.014238	0.002131	0.001152	0.003944	0.016991	0.001282	0.000771	0.004125	0.026982	0.007101	0.002024	0.004108	0.025069	0.009308	0.000419	0.00115	0.005491	0.014055	0.004531	0.002843	0.01815	0.031534	0.002901	0.005429	0.027576	0.049926	0.006787	0.004112	0.013236	0.028114	0.003972	0.00868	0.036069	0.012879	0.014825
Corynebacterium urealyticum DSM 7111 uid188688	0.004031	0.005744	0.022643	0.030093	0.000522	0.006755	0.039389	0.021177	0.002947	0.004589	0.036033	0.014716	0.000798	0.002383	0.014269	0.002046	0.001118	0.003849	0.016815	0.001305	0.000699	0.003928	0.027384	0.006825	0.001901	0.003999	0.025549	0.009246	0.00042	0.001124	0.0054	0.013837	0.004246	0.002725	0.018306	0.031708	0.002904	0.005375	0.027608	0.050568	0.006747	0.003927	0.013421	0.028227	0.003939	0.008538	0.036429	0.012775	0.014779
Corynebacterium variabile DSM 44702 uid62003	0.002015	0.002955	0.020131	0.021852	0.000496	0.001943	0.039655	0.019948	0.003385	0.003203	0.048109	0.013912	0.000948	0.003563	0.008505	0.003251	0.000266	0.001597	0.018353	0.000951	0.000176	0.000786	0.028472	0.002758	0.002722	0.002007	0.028007	0.012716	0.001815	0.001647	0.006062	0.014667	0.001218	0.003255	0.017976	0.02631	0.000808	0.002766	0.038726	0.048833	0.002051	0.003069	0.016874	0.0311	0.003416	0.011791	0.02802	0.020964	0.010177
Coxiella burnetii CbuG Q212 uid58893	0.049645	0.028745	0.012912	0.012727	0.01012	0.042785	0.020231	0.022367	0.009794	0.012013	0.014258	0.014851	0.004772	0.009987	0.010524	0.002775	0.001912	0.02244	0.010326	0.000724	0.03998	0.034133	0.010722	0.025679	0.009139	0.011119	0.008962	0.009326	0.000953	0.006368	0.005038	0.011897	0.030472	0.01534	0.008928	0.011202	0.007243	0.016896	0.010314	0.010114	0.007626	0.013503	0.011664	0.010994	0.011367	0.013008	0.014533	0.007668	0.045489
Coxiella burnetii CbuK Q154 uid58895	0.04967	0.028945	0.012972	0.012832	0.010273	0.042594	0.020007	0.022157	0.009831	0.012201	0.014134	0.014645	0.004914	0.009913	0.010563	0.002881	0.001859	0.022595	0.010336	0.000766	0.039743	0.034373	0.010737	0.025723	0.009427	0.011125	0.009009	0.009236	0.000928	0.006342	0.005056	0.011772	0.030644	0.015385	0.008839	0.011443	0.007343	0.01697	0.010497	0.010099	0.00777	0.013749	0.011851	0.011042	0.011446	0.012987	0.014428	0.007665	0.045718
Coxiella burnetii Dugway 5J108 111 uid58629	0.050061	0.029754	0.013224	0.013103	0.01089	0.042369	0.019825	0.021727	0.010171	0.012683	0.014013	0.014311	0.005256	0.010136	0.010703	0.002964	0.00178	0.022956	0.010266	0.000688	0.040225	0.034977	0.010939	0.024801	0.009724	0.011682	0.009082	0.009209	0.000908	0.006215	0.005049	0.012148	0.03058	0.01516	0.008865	0.011034	0.007654	0.017404	0.010512	0.010055	0.007922	0.013962	0.011721	0.010627	0.011244	0.012556	0.013571	0.007031	0.046094
Coxiella burnetii RSA 331 uid58637	0.049446	0.028886	0.012895	0.012948	0.010133	0.042272	0.020183	0.02227	0.009636	0.012049	0.014094	0.014999	0.004617	0.009906	0.010672	0.002658	0.001973	0.022321	0.010283	0.000782	0.039801	0.034144	0.010545	0.025712	0.009198	0.011025	0.008972	0.009355	0.000907	0.006493	0.004941	0.011939	0.030788	0.015086	0.008927	0.011581	0.007267	0.016913	0.010581	0.010167	0.007717	0.013386	0.01163	0.010996	0.011281	0.013077	0.014581	0.007897	0.045833
Coxiella burnetii RSA 493 uid57631	0.049643	0.028651	0.012917	0.012778	0.01013	0.042919	0.020327	0.02222	0.009656	0.012225	0.014351	0.014727	0.004738	0.009825	0.010585	0.002724	0.001872	0.022586	0.010406	0.000719	0.040178	0.034176	0.010778	0.025426	0.009131	0.011246	0.009068	0.009253	0.000912	0.00623	0.005049	0.011952	0.030465	0.015223	0.008952	0.011173	0.007292	0.016865	0.01049	0.010037	0.00763	0.01359	0.01173	0.010965	0.011358	0.013091	0.014448	0.007562	0.045553
Crinalium epipsammum PCC 9333 uid183113	0.036716	0.031375	0.014359	0.014301	0.01219	0.042129	0.013813	0.017676	0.018329	0.022682	0.009818	0.00555	0.008146	0.016281	0.010148	0.003303	0.001825	0.020328	0.009607	0.000729	0.042678	0.030025	0.007847	0.020046	0.011655	0.017154	0.005476	0.004426	0.000543	0.006169	0.003609	0.01395	0.039695	0.011127	0.006677	0.015661	0.015132	0.01279	0.007385	0.011457	0.016236	0.017336	0.00803	0.004732	0.007436	0.012883	0.012709	0.005751	0.047417
Croceibacter atlanticus HTCC2559 uid49661	0.054822	0.041102	0.021087	0.018787	0.028445	0.040466	0.007353	0.020576	0.028578	0.0206	0.009018	0.005168	0.015127	0.016311	0.007981	0.003256	0.002339	0.027678	0.011913	0.000472	0.046568	0.043086	0.007513	0.010261	0.012491	0.02444	0.002293	0.002117	0.000186	0.005309	0.001972	0.009568	0.027335	0.010632	0.00675	0.007323	0.011067	0.019742	0.002695	0.002757	0.015969	0.01415	0.001283	0.00201	0.002937	0.008849	0.003168	0.000392	0.048409
Cronobacter sakazakii ATCC BAA 894 uid58145	0.028594	0.011688	0.024161	0.011311	0.003656	0.021805	0.028008	0.026502	0.003893	0.004513	0.025311	0.019891	0.001723	0.004153	0.020813	0.001403	0.001917	0.013799	0.013424	0.00022	0.006329	0.019635	0.019566	0.006067	0.004308	0.005282	0.009668	0.011335	0.001144	0.002952	0.007479	0.015348	0.007077	0.010662	0.01223	0.036893	0.001874	0.013645	0.01887	0.060833	0.003712	0.005342	0.006172	0.030479	0.001919	0.015068	0.034607	0.006116	0.031741
Cronobacter sakazakii ES15 uid167045	0.028369	0.011124	0.024357	0.010883	0.003172	0.021769	0.028307	0.026303	0.003597	0.004314	0.025851	0.020335	0.001322	0.003869	0.02124	0.001117	0.001862	0.013711	0.013586	0.000199	0.006054	0.019137	0.019078	0.005801	0.004021	0.005217	0.009765	0.01167	0.001075	0.002799	0.00754	0.015561	0.006908	0.010451	0.011972	0.036844	0.001677	0.013659	0.018956	0.062449	0.003365	0.0053	0.006231	0.031501	0.001712	0.015222	0.035068	0.005683	0.031622
Cronobacter sakazakii Sp291 uid189241	0.028665	0.011285	0.024308	0.011077	0.003191	0.021971	0.028208	0.026368	0.003568	0.004341	0.025704	0.020035	0.001387	0.004004	0.020984	0.001169	0.001885	0.013797	0.013523	0.000214	0.006193	0.019185	0.019117	0.005869	0.004109	0.005179	0.009883	0.011596	0.001108	0.00291	0.007447	0.01551	0.006951	0.010464	0.011952	0.036696	0.001744	0.013613	0.018814	0.062324	0.003509	0.005314	0.006238	0.031207	0.00175	0.015363	0.035034	0.00569	0.031897
Cronobacter turicensis z3032 uid40821	0.027756	0.011406	0.023996	0.011171	0.003526	0.021095	0.02885	0.026125	0.003264	0.00421	0.025984	0.020193	0.001512	0.003845	0.021184	0.001488	0.001911	0.013647	0.013681	0.000219	0.006086	0.018747	0.019633	0.006383	0.003951	0.005109	0.010065	0.011796	0.001131	0.002905	0.00786	0.015528	0.007176	0.010854	0.011804	0.036774	0.001763	0.012747	0.018309	0.062848	0.003212	0.005379	0.006528	0.03143	0.00199	0.014734	0.035354	0.006117	0.031195
Cryptobacterium curtum DSM 15641 uid59041	0.015844	0.016541	0.014577	0.021518	0.006578	0.030462	0.020877	0.024764	0.012335	0.010637	0.018466	0.017591	0.001488	0.009557	0.012363	0.001541	0.001348	0.016577	0.010915	0.001076	0.007585	0.023155	0.013772	0.013857	0.012117	0.011036	0.00699	0.01466	0.000459	0.006527	0.008444	0.010399	0.012501	0.013524	0.007485	0.022794	0.004532	0.028602	0.014352	0.020697	0.008578	0.010512	0.009839	0.012013	0.005303	0.019007	0.02268	0.006472	0.040258
Cupriavidus metallidurans CH34 uid57815	0.004238	0.007383	0.020053	0.028856	0.001007	0.007676	0.038065	0.025863	0.003674	0.00297	0.023086	0.023945	0.000896	0.002708	0.015323	0.001995	0.000682	0.007439	0.016283	0.000426	0.000585	0.005664	0.029447	0.009329	0.002369	0.001943	0.009752	0.021123	0.002066	0.001407	0.008121	0.014072	0.007039	0.008516	0.014478	0.030552	0.002242	0.006442	0.020048	0.063794	0.005028	0.003821	0.013085	0.030913	0.003768	0.010966	0.041182	0.01187	0.023658
Cupriavidus necator N 1 uid68689	0.002877	0.005642	0.02031	0.028583	0.000589	0.004694	0.038903	0.02538	0.00176	0.00207	0.030228	0.017019	0.000458	0.001561	0.017033	0.001999	0.000591	0.00666	0.017136	0.000488	0.000236	0.006061	0.028687	0.005364	0.001619	0.001195	0.008883	0.019686	0.002083	0.000822	0.008896	0.013956	0.004892	0.007604	0.014991	0.033645	0.001198	0.00395	0.012841	0.080002	0.002747	0.002835	0.01448	0.03392	0.001566	0.005394	0.050852	0.011133	0.021258
Cupriavidus taiwanensis LMG 19424 uid61615	0.002469	0.004944	0.020882	0.028463	0.000377	0.003805	0.039602	0.024826	0.001222	0.001471	0.031181	0.016532	0.000323	0.001095	0.016831	0.001637	0.000588	0.006386	0.017324	0.000435	0.00016	0.005057	0.029634	0.004339	0.000938	0.000855	0.00825	0.020621	0.00207	0.000587	0.008556	0.013703	0.004157	0.007704	0.014808	0.034283	0.000711	0.002798	0.013394	0.082668	0.001946	0.002125	0.014697	0.035613	0.001257	0.004528	0.052491	0.011369	0.021014
Cyanobacterium PCC 10605 uid183340	0.052002	0.045861	0.012707	0.009954	0.015907	0.05164	0.015806	0.017919	0.013979	0.022572	0.012666	0.004459	0.014013	0.019959	0.005771	0.003558	0.002004	0.027738	0.00628	0.000682	0.061673	0.03577	0.007406	0.014302	0.008876	0.020783	0.006594	0.002804	0.000368	0.007817	0.002171	0.012961	0.038809	0.012781	0.004249	0.009105	0.009374	0.012473	0.006221	0.003537	0.006701	0.020006	0.011201	0.002633	0.004231	0.01192	0.005425	0.001586	0.053682
Cyanobacterium stanieri PCC 7202 uid183337	0.044583	0.038052	0.015205	0.012137	0.011777	0.045213	0.021736	0.020066	0.009267	0.016761	0.022628	0.004678	0.01166	0.018592	0.006435	0.006413	0.002139	0.025938	0.006824	0.000647	0.044905	0.034373	0.007676	0.021261	0.006658	0.016454	0.010276	0.003625	0.000344	0.007849	0.002108	0.013134	0.036989	0.013519	0.005028	0.010718	0.010946	0.012947	0.011223	0.004579	0.005562	0.018256	0.017089	0.002016	0.004578	0.013062	0.00627	0.002722	0.048481
cyanobacterium UCYN A uid43697	0.056464	0.044039	0.011228	0.013614	0.02798	0.053332	0.010758	0.018602	0.018594	0.026175	0.005045	0.002835	0.015726	0.017671	0.005958	0.003098	0.002141	0.027586	0.006399	0.000627	0.056497	0.035729	0.00748	0.013384	0.01464	0.026879	0.003686	0.002311	0.000322	0.008055	0.002396	0.012314	0.032974	0.015285	0.003131	0.008267	0.016095	0.018135	0.003273	0.003351	0.012087	0.021983	0.002827	0.001705	0.004978	0.013549	0.003611	0.001047	0.049701
Cyanobium gracile PCC 6307 uid182931	0.002516	0.003782	0.016757	0.016479	0.00048	0.003264	0.034311	0.017157	0.001951	0.001582	0.032088	0.010769	0.001143	0.003165	0.024961	0.003705	0.000142	0.003799	0.013981	0.00035	0.000461	0.003262	0.027568	0.004358	0.001868	0.001486	0.015527	0.008827	0.002814	0.00144	0.009545	0.017003	0.002766	0.00582	0.014866	0.036686	0.001034	0.004804	0.031691	0.087022	0.003343	0.003734	0.03265	0.024412	0.002882	0.005612	0.038083	0.029722	0.012392
Cyanothece ATCC 51142 uid59013	0.045457	0.034588	0.014135	0.009835	0.009525	0.050042	0.015781	0.019233	0.012565	0.016985	0.021391	0.006136	0.009962	0.018218	0.005337	0.002874	0.00229	0.026436	0.006467	0.000606	0.059833	0.034202	0.007115	0.013741	0.009482	0.018711	0.007578	0.003719	0.000435	0.008184	0.001769	0.014274	0.04265	0.01423	0.004654	0.00923	0.010547	0.011689	0.00894	0.006574	0.007675	0.019709	0.013617	0.00437	0.007615	0.013382	0.00609	0.00484	0.053977
Cyanothece PCC 7424 uid59025	0.04484	0.035011	0.01131	0.008815	0.010756	0.046986	0.015926	0.018033	0.011007	0.020706	0.017169	0.006877	0.010137	0.017115	0.005772	0.00247	0.00227	0.026906	0.005644	0.000518	0.056907	0.034848	0.005791	0.01262	0.009164	0.020488	0.006956	0.004215	0.000438	0.008235	0.001687	0.014696	0.04448	0.014029	0.004318	0.01005	0.009979	0.01322	0.011092	0.007849	0.00688	0.018714	0.013867	0.008031	0.009745	0.011254	0.00717	0.006561	0.05205
Cyanothece PCC 7425 uid59435	0.021947	0.019921	0.013751	0.012815	0.002628	0.033315	0.021776	0.018095	0.007977	0.010382	0.025539	0.011283	0.004121	0.013528	0.012055	0.002858	0.00139	0.017051	0.012077	0.000921	0.019	0.026734	0.010869	0.0187	0.005695	0.01027	0.013037	0.005417	0.00092	0.00637	0.004305	0.015935	0.026658	0.01151	0.009045	0.034681	0.008859	0.009675	0.017692	0.046973	0.009119	0.01108	0.023991	0.010206	0.007688	0.009693	0.016594	0.017049	0.038397
Cyanothece PCC 7822 uid52547	0.043535	0.033032	0.012622	0.010732	0.01097	0.043715	0.016755	0.017542	0.011261	0.01927	0.017868	0.006419	0.008841	0.016184	0.008528	0.002614	0.002096	0.025877	0.006874	0.00062	0.048533	0.033414	0.006632	0.015541	0.009542	0.018382	0.006289	0.004837	0.000456	0.007592	0.002303	0.014502	0.041935	0.01331	0.004596	0.012457	0.012556	0.013397	0.011653	0.010536	0.007355	0.018062	0.013525	0.008314	0.008991	0.011152	0.00968	0.005807	0.05024
Cyanothece PCC 8801 uid59027	0.04235	0.033136	0.012706	0.01046	0.007487	0.049559	0.016853	0.018476	0.010965	0.016244	0.020904	0.008364	0.007938	0.017462	0.006433	0.0026	0.001988	0.025468	0.006957	0.00073	0.052511	0.033047	0.006865	0.014819	0.009398	0.016552	0.008463	0.004794	0.0005	0.008038	0.002167	0.014481	0.044338	0.013368	0.005368	0.011014	0.012642	0.012644	0.011832	0.008686	0.007269	0.017755	0.016857	0.005336	0.008543	0.012301	0.009522	0.006146	0.052571
Cyanothece PCC 8802 uid59143	0.041855	0.032927	0.012811	0.010279	0.007355	0.049558	0.016978	0.018489	0.010902	0.016313	0.021165	0.00839	0.007733	0.017495	0.006462	0.002592	0.002038	0.025355	0.007046	0.00073	0.052202	0.033052	0.006903	0.01477	0.009332	0.016559	0.008537	0.004826	0.00049	0.008033	0.002139	0.014439	0.044414	0.013304	0.00541	0.010988	0.012699	0.012563	0.012033	0.008755	0.007246	0.017787	0.017038	0.005297	0.008477	0.012342	0.00959	0.006183	0.052595
Cyclobacterium marinum DSM 745 uid71485	0.051126	0.040101	0.016386	0.019952	0.019521	0.036787	0.017439	0.023945	0.014287	0.013687	0.017936	0.004694	0.014188	0.014643	0.009058	0.010024	0.001823	0.026607	0.012629	0.00044	0.025348	0.03921	0.012024	0.027161	0.012864	0.014578	0.011061	0.003525	0.000533	0.004549	0.002411	0.012995	0.023978	0.013048	0.005374	0.010986	0.010528	0.019425	0.005534	0.009159	0.009387	0.015951	0.007439	0.006547	0.004372	0.003867	0.002382	0.002777	0.049755
Cycloclasticus P1 uid176368	0.042491	0.026266	0.016503	0.015094	0.012959	0.04079	0.013512	0.025324	0.017635	0.01134	0.014353	0.010692	0.00656	0.013332	0.012047	0.003643	0.002043	0.018787	0.009822	0.000604	0.039123	0.032355	0.008071	0.019795	0.015502	0.012397	0.004433	0.00734	0.000482	0.006154	0.00398	0.0114	0.029553	0.014515	0.008036	0.012505	0.012691	0.016376	0.005994	0.010749	0.013193	0.012675	0.006272	0.007042	0.007144	0.014554	0.008748	0.0036	0.041861
Cycloclasticus zancles 7 ME uid214092	0.04252	0.026778	0.016336	0.01539	0.013591	0.04077	0.013539	0.025291	0.017383	0.011593	0.013789	0.010538	0.006842	0.013509	0.011858	0.003747	0.002034	0.019272	0.009897	0.000599	0.038723	0.032726	0.008155	0.019638	0.01567	0.012621	0.004541	0.007309	0.00054	0.006393	0.004054	0.011717	0.029257	0.014787	0.007956	0.012601	0.012761	0.016597	0.006021	0.010938	0.013102	0.012796	0.00615	0.007016	0.007299	0.014636	0.008625	0.00366	0.041503
Cylindrospermum stagnale PCC 7417 uid183111	0.035558	0.029142	0.01586	0.014489	0.011161	0.039056	0.017842	0.017276	0.017295	0.019492	0.013903	0.005717	0.008015	0.014859	0.011073	0.003298	0.00162	0.019517	0.011087	0.000808	0.032597	0.029672	0.009946	0.024649	0.010621	0.01596	0.007183	0.004711	0.000676	0.005935	0.003818	0.014134	0.036927	0.010766	0.007035	0.017766	0.01476	0.011036	0.010997	0.01679	0.015556	0.013321	0.011761	0.006356	0.006891	0.010127	0.012866	0.008097	0.0459
Cytophaga hutchinsonii ATCC 33406 uid57651	0.055195	0.035815	0.019573	0.014527	0.01706	0.039811	0.021571	0.021862	0.029976	0.009743	0.014882	0.012559	0.008595	0.01079	0.011147	0.002129	0.00201	0.030475	0.013675	0.0004	0.028863	0.034408	0.014521	0.015902	0.01494	0.015612	0.009019	0.006958	0.000432	0.006189	0.004222	0.010812	0.013825	0.012051	0.006548	0.02069	0.004002	0.01689	0.003851	0.021455	0.00754	0.010396	0.004674	0.013683	0.001779	0.010381	0.006563	0.004026	0.046441
Dactylococcopsis salina PCC 8305 uid183341	0.037969	0.029308	0.015883	0.009588	0.003717	0.043374	0.018789	0.017455	0.013331	0.016924	0.01908	0.009895	0.006838	0.016744	0.008526	0.001668	0.001934	0.022277	0.007165	0.000727	0.046464	0.030655	0.009672	0.014606	0.008201	0.016009	0.008007	0.006157	0.000629	0.006958	0.001983	0.01368	0.039885	0.01152	0.005168	0.012404	0.00862	0.012637	0.015168	0.009341	0.009875	0.014262	0.014833	0.006924	0.011283	0.01344	0.010976	0.005867	0.057774
Dechloromonas aromatica RCB uid58025	0.011762	0.012112	0.018734	0.029114	0.002069	0.014885	0.03635	0.024588	0.004113	0.004918	0.026906	0.014446	0.001435	0.005066	0.016567	0.002091	0.000929	0.008946	0.014533	0.000438	0.001623	0.011196	0.026327	0.015186	0.004215	0.003212	0.011906	0.015221	0.001665	0.002607	0.007648	0.013546	0.010223	0.009583	0.01229	0.027326	0.003526	0.009373	0.020739	0.057557	0.005894	0.004593	0.010629	0.02712	0.004193	0.012071	0.031917	0.011318	0.035403
Dechlorosoma suillum PS uid81439	0.005126	0.006513	0.021142	0.031941	0.00082	0.006472	0.037553	0.021982	0.001342	0.002387	0.035326	0.007829	0.000666	0.002383	0.018359	0.001364	0.000737	0.00543	0.017861	0.000487	0.000638	0.004875	0.030457	0.005196	0.001182	0.001719	0.022892	0.005517	0.001784	0.00139	0.008312	0.013403	0.004479	0.005936	0.015964	0.036106	0.001561	0.004057	0.021831	0.080795	0.001739	0.002834	0.027842	0.019285	0.001552	0.006154	0.036529	0.021356	0.029412
Deferribacter desulfuricans SSM1 uid46653	0.078302	0.04501	0.013317	0.020179	0.038897	0.046814	0.011435	0.020469	0.021054	0.016829	0.004408	0.002401	0.022222	0.014747	0.005062	0.007596	0.001783	0.035672	0.00807	0.00053	0.042485	0.048119	0.006286	0.018591	0.015234	0.015913	0.003041	0.002161	0.000744	0.007533	0.002439	0.006119	0.013067	0.011467	0.003337	0.007398	0.007947	0.021019	0.003195	0.004005	0.013706	0.013995	0.001621	0.001484	0.001051	0.001728	0.000479	0.00026	0.050532
Dehalobacter 11DCA uid177715	0.042295	0.026609	0.016532	0.023269	0.011544	0.036059	0.029703	0.025992	0.013542	0.008485	0.016857	0.013605	0.011956	0.009789	0.013165	0.008371	0.001789	0.02385	0.011173	0.000721	0.014143	0.02718	0.0132	0.015938	0.008128	0.00917	0.012747	0.007378	0.000898	0.005686	0.006227	0.009451	0.013593	0.012041	0.005216	0.023441	0.005661	0.020257	0.011196	0.033273	0.005869	0.009494	0.006731	0.015388	0.003338	0.006786	0.007362	0.008989	0.048243
Dehalobacter CF uid177714	0.042869	0.027181	0.016617	0.023295	0.011991	0.036343	0.029264	0.025827	0.013762	0.00867	0.016682	0.01339	0.012182	0.009891	0.013048	0.008324	0.001794	0.024097	0.011156	0.000715	0.014504	0.027452	0.013006	0.016038	0.008349	0.009277	0.012602	0.00723	0.000876	0.005721	0.006155	0.009332	0.013828	0.011994	0.005197	0.023022	0.005816	0.020444	0.010979	0.032491	0.005971	0.009536	0.0066	0.015057	0.003252	0.006869	0.00725	0.008686	0.048575
Dehalococcoides BAV1 uid58477	0.03832	0.021576	0.018191	0.020528	0.031107	0.025808	0.015439	0.025587	0.008379	0.014729	0.025637	0.003873	0.006494	0.009894	0.015409	0.005971	0.001818	0.018458	0.012791	0.000907	0.009211	0.024872	0.013237	0.014562	0.010537	0.010422	0.012158	0.004768	0.00069	0.005433	0.007724	0.010165	0.010213	0.010853	0.007637	0.022824	0.005096	0.022794	0.007971	0.044139	0.003906	0.01228	0.014657	0.012661	0.002516	0.011735	0.014385	0.009281	0.046466
Dehalococcoides CBDB1 uid58413	0.03834	0.021579	0.017955	0.020115	0.031346	0.026288	0.015277	0.025672	0.00845	0.014742	0.026104	0.003697	0.006369	0.009849	0.015088	0.00587	0.001836	0.018127	0.012756	0.00095	0.009433	0.025185	0.013386	0.014881	0.01057	0.010443	0.012052	0.004626	0.000695	0.005619	0.007925	0.010579	0.010267	0.010952	0.007751	0.022865	0.00507	0.022927	0.007786	0.043962	0.003857	0.012575	0.014838	0.012677	0.002597	0.011491	0.014219	0.00924	0.046499
Dehalococcoides ethenogenes 195 uid57763	0.036668	0.019929	0.018732	0.021588	0.029957	0.024903	0.01642	0.025408	0.007608	0.013344	0.026826	0.004572	0.00567	0.008392	0.017527	0.006151	0.001811	0.018407	0.013603	0.00097	0.00911	0.024299	0.013553	0.011751	0.009533	0.009774	0.013257	0.005115	0.000807	0.004947	0.008578	0.010276	0.006974	0.009776	0.008192	0.025856	0.003722	0.021374	0.008133	0.048532	0.002681	0.010201	0.015727	0.014916	0.00137	0.009844	0.015971	0.011305	0.043794
Dehalococcoides GT uid42115	0.037858	0.020926	0.017915	0.021107	0.030311	0.025845	0.015521	0.025897	0.008308	0.01452	0.02584	0.004043	0.006487	0.0099	0.015067	0.006254	0.001806	0.017793	0.012969	0.000991	0.009083	0.024699	0.013556	0.014412	0.010604	0.010442	0.012098	0.004826	0.000675	0.005466	0.007672	0.010395	0.010027	0.010768	0.007765	0.023237	0.00515	0.023087	0.008305	0.043677	0.003786	0.012363	0.014743	0.012908	0.002638	0.011527	0.014095	0.00937	0.046484
Dehalococcoides mccartyi BTF08 uid190183	0.037736	0.021061	0.018517	0.021234	0.029951	0.025787	0.016287	0.025743	0.008751	0.014508	0.025355	0.004493	0.006677	0.009677	0.015176	0.006067	0.001832	0.018044	0.012993	0.000924	0.009394	0.024301	0.013732	0.014238	0.010505	0.010204	0.012281	0.004988	0.000732	0.005415	0.007801	0.010542	0.010291	0.010704	0.00782	0.022909	0.005223	0.022893	0.008634	0.042585	0.004107	0.012153	0.014483	0.012783	0.002859	0.011411	0.014234	0.009444	0.046003
[truncated: 1,841 more rows]
[truncated: 15 more columns]
